# Supplementary material for: Metal-free intermolecular formal cycloadditions enable an orthogonal access to nitrogen heterocycles
Source: PubMed Central journal article supplement (PMC4796318; doi:10.1038/ncomms10914), 2016-03-15
Supplement: ncomms10914-s1.pdf [file ncomms10914-s1.pdf]

# Supplementary Figures

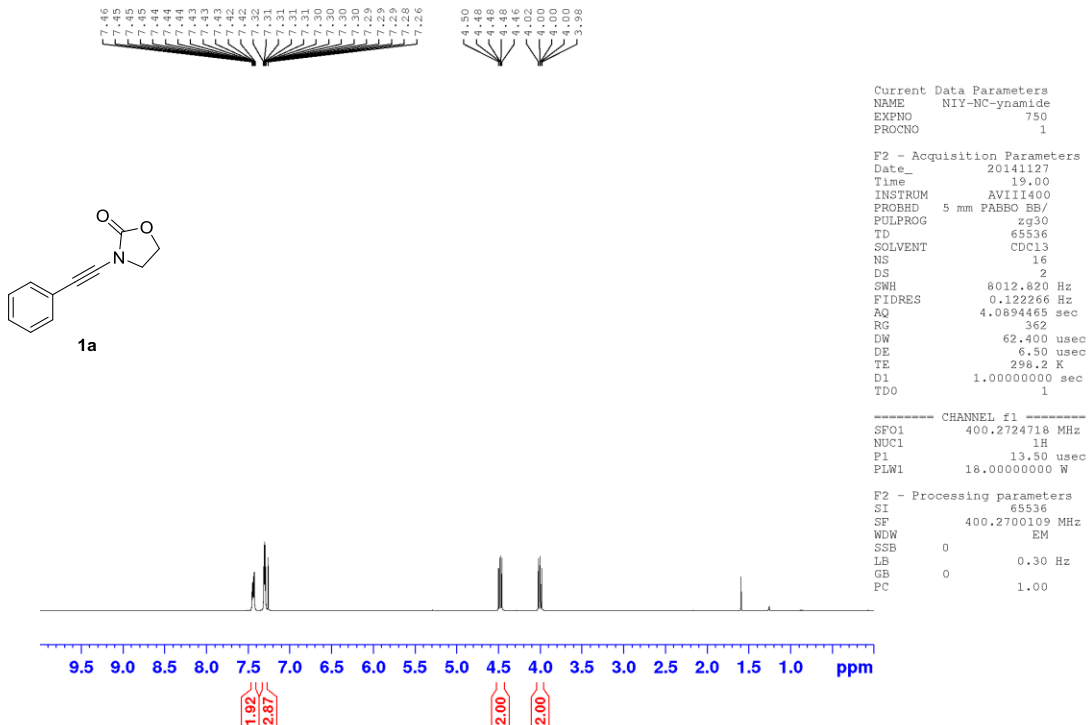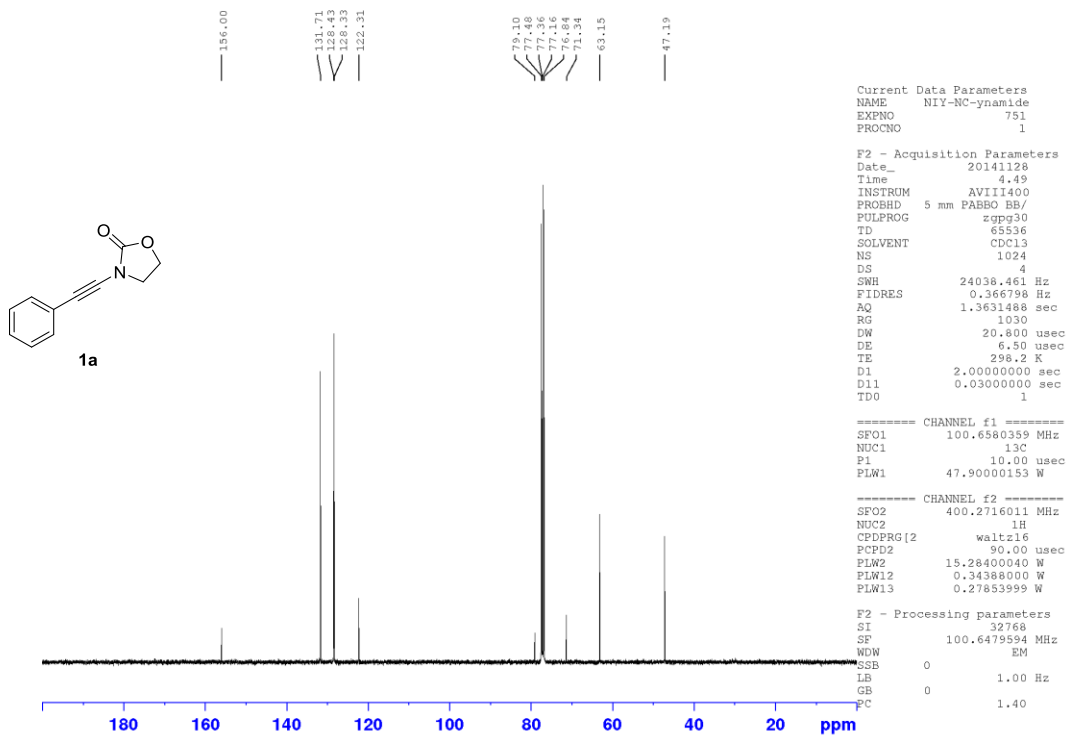

Supplementary Figure 1. <sup>1</sup>H NMR and <sup>13</sup>C NMR spectra of substrate 1a

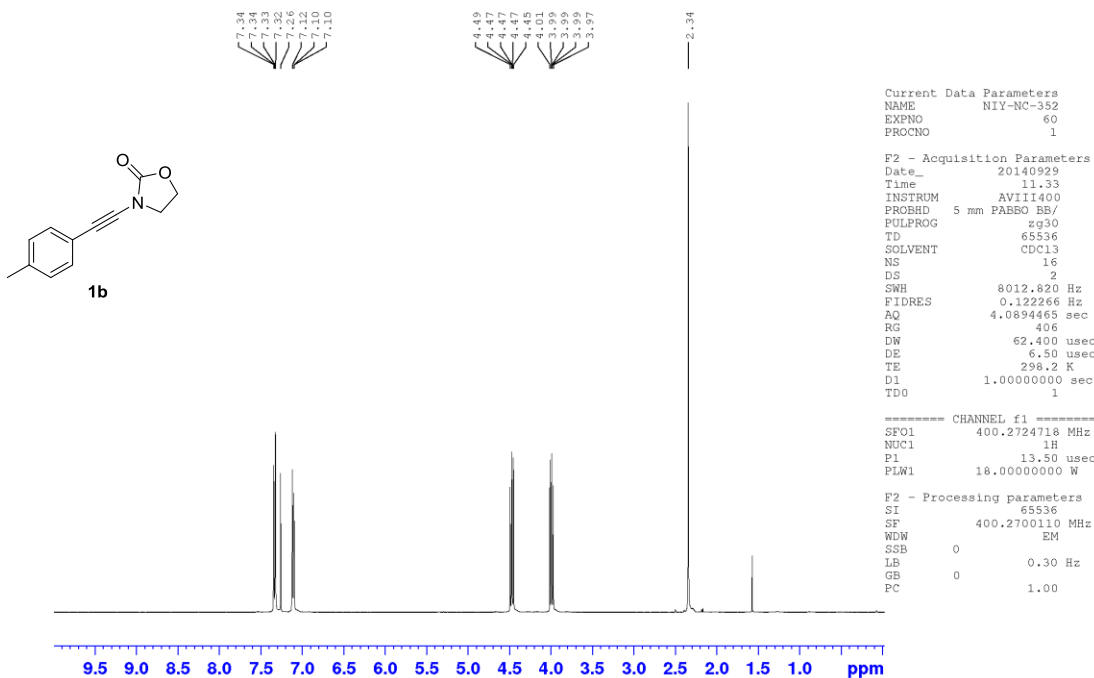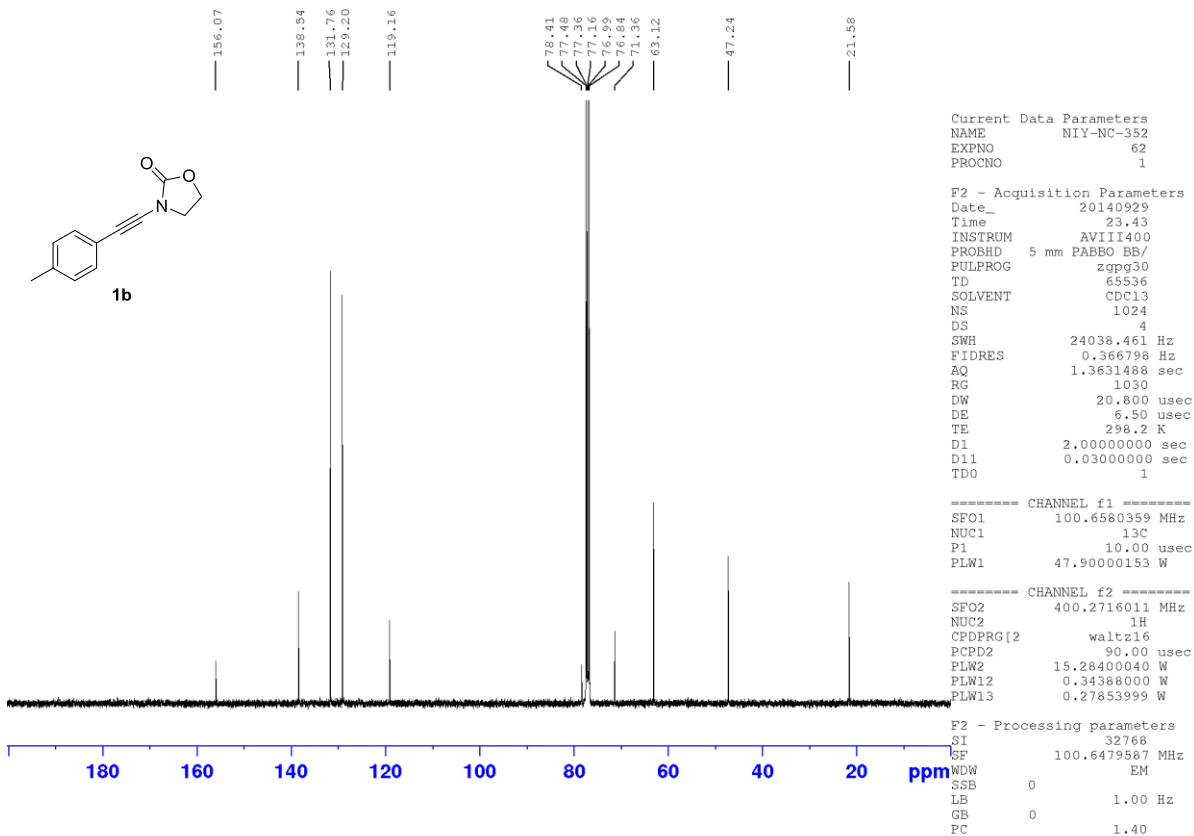

Supplementary Figure 2.  $^1\text{H}$  NMR and  $^{13}\text{C}$  NMR spectra of substrate **1b**

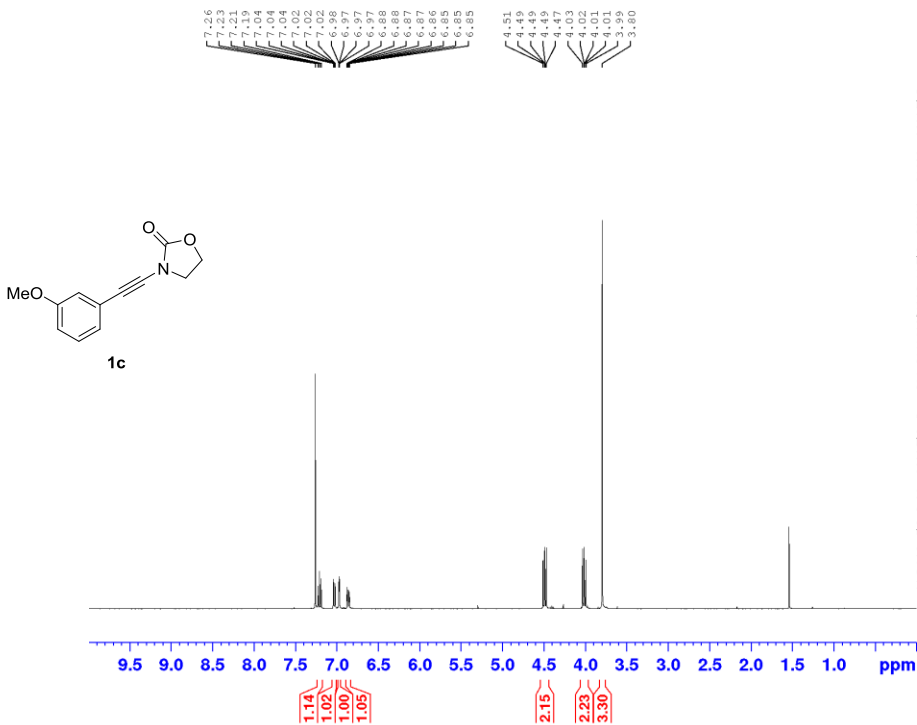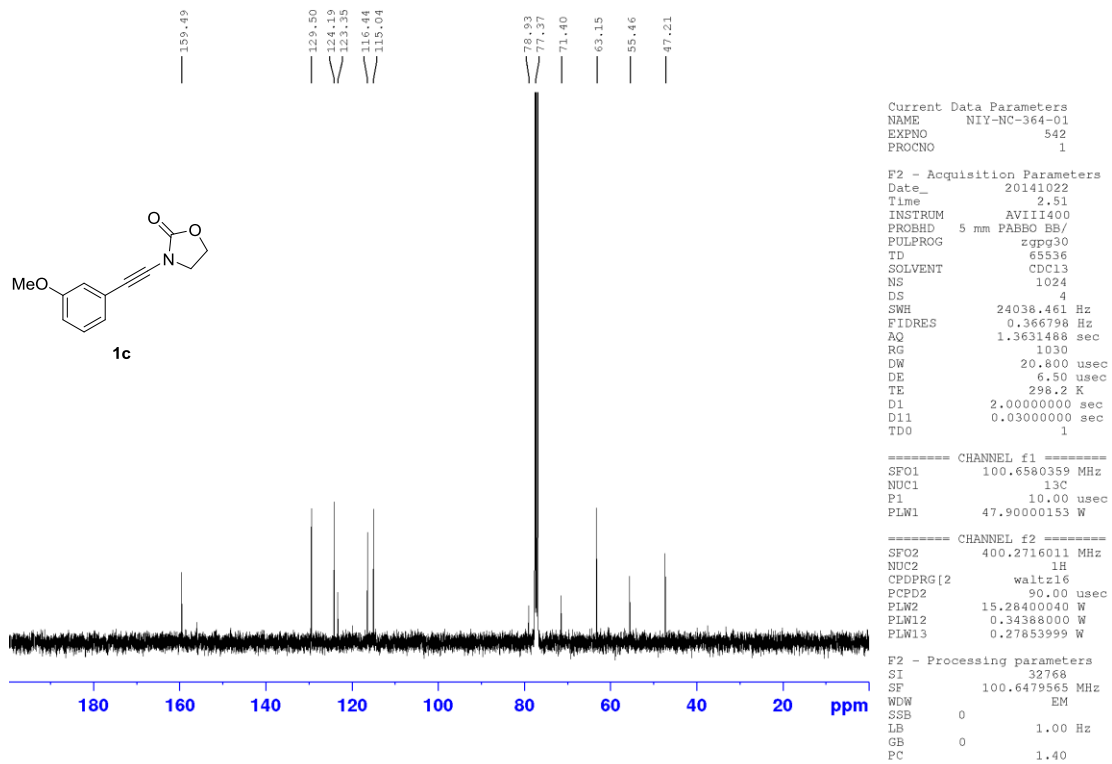

Supplementary Figure 3. <sup>1</sup>H NMR and <sup>13</sup>C NMR spectra of substrate **1c**

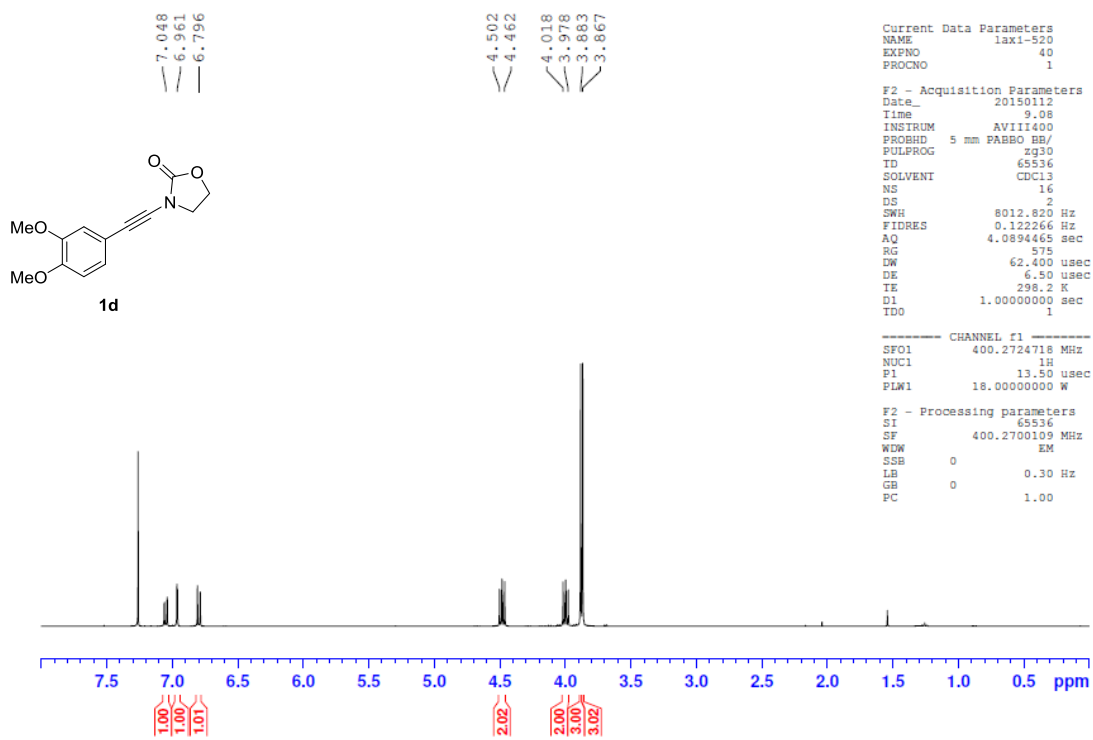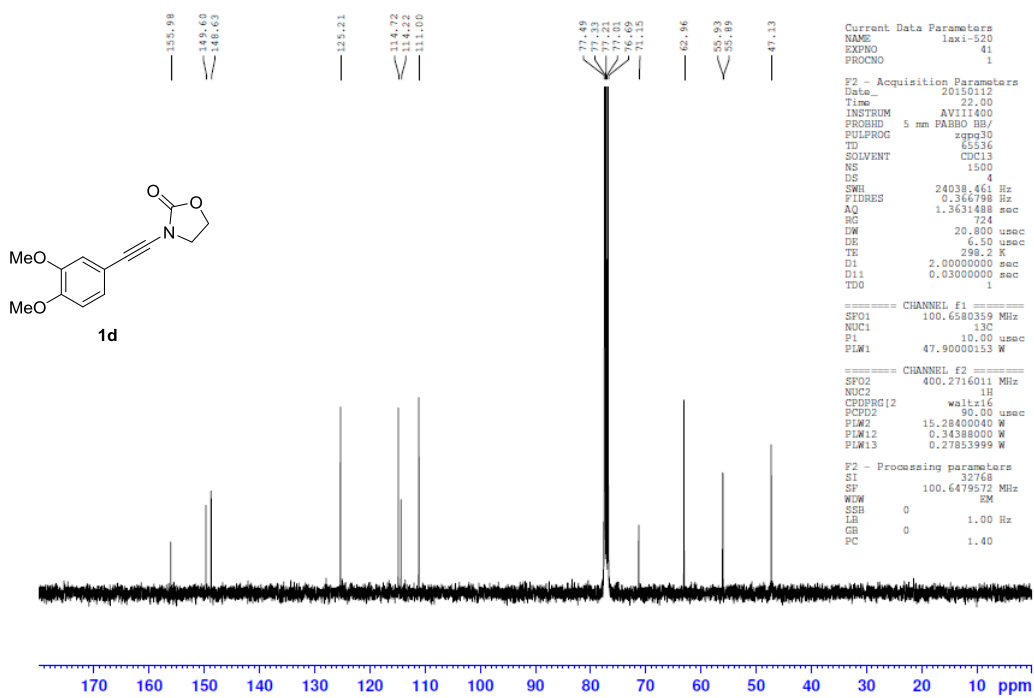

Supplementary Figure 4. <sup>1</sup>H NMR and <sup>13</sup>C NMR spectra of substrate **1d**

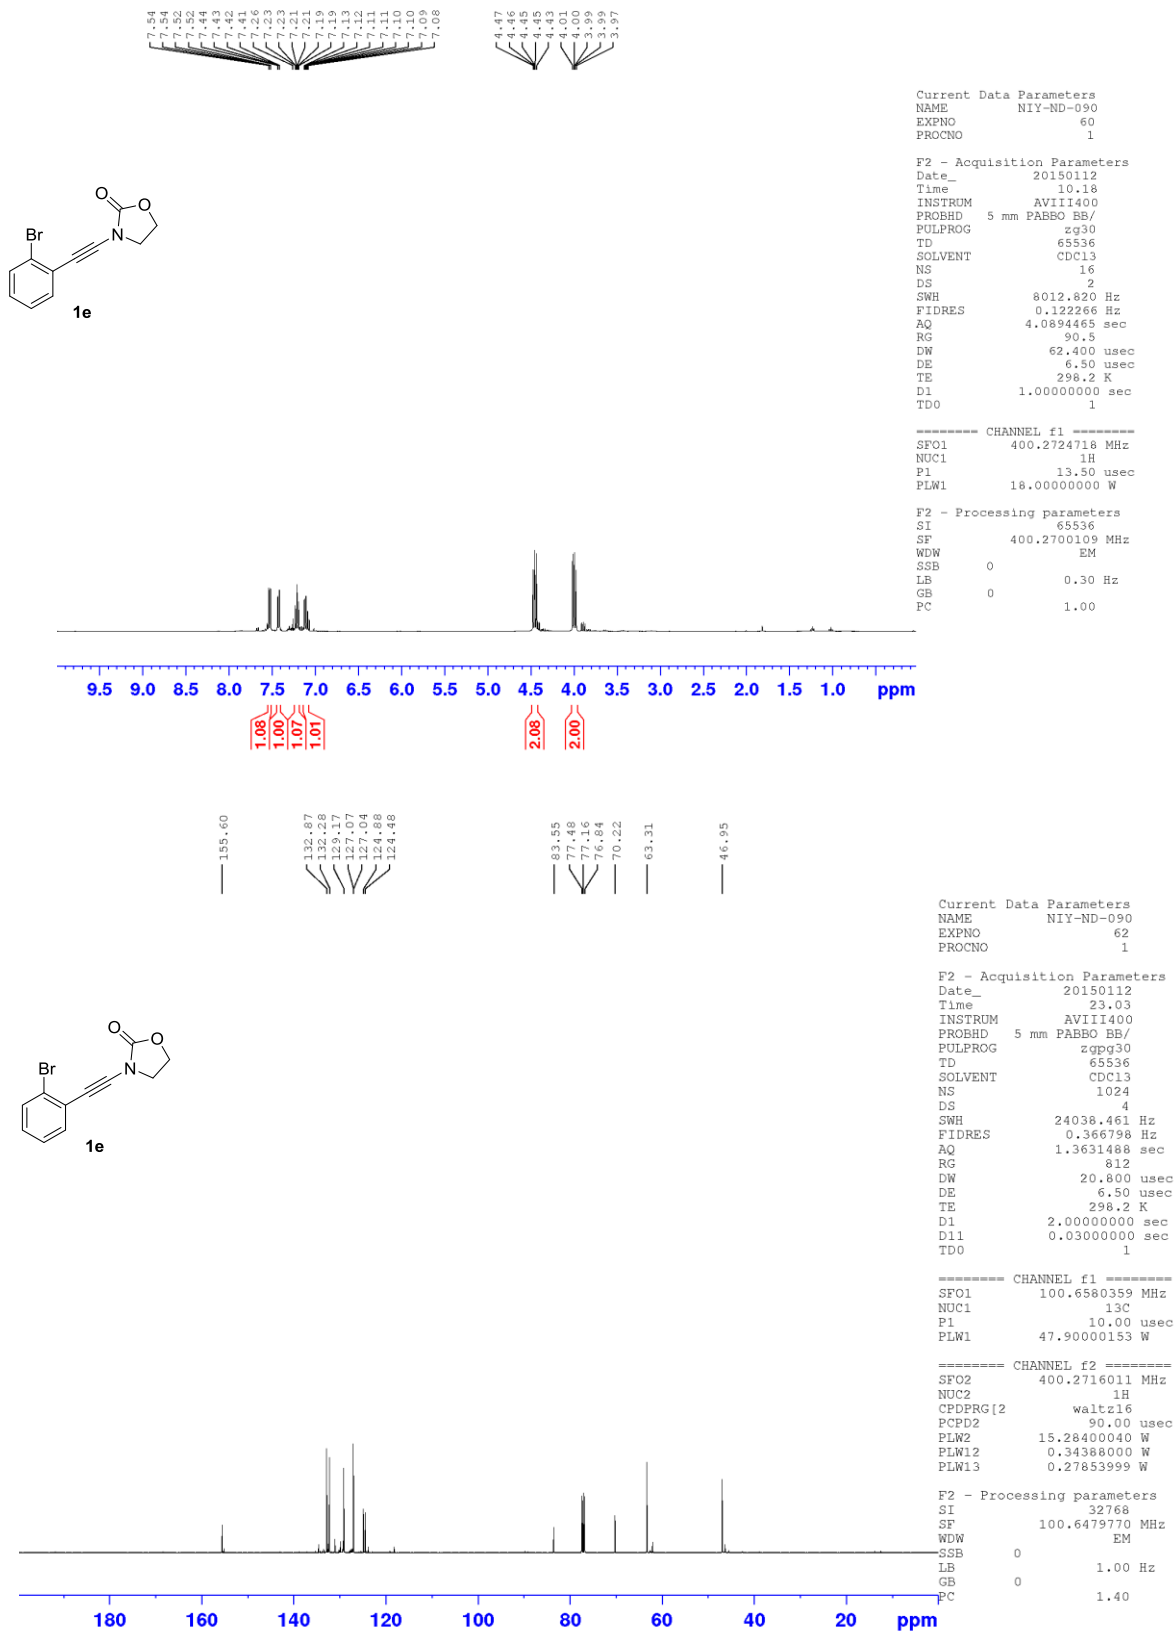

Supplementary Figure 5. . <sup>1</sup>H NMR and <sup>13</sup>C NMR spectra of substrate **1e**

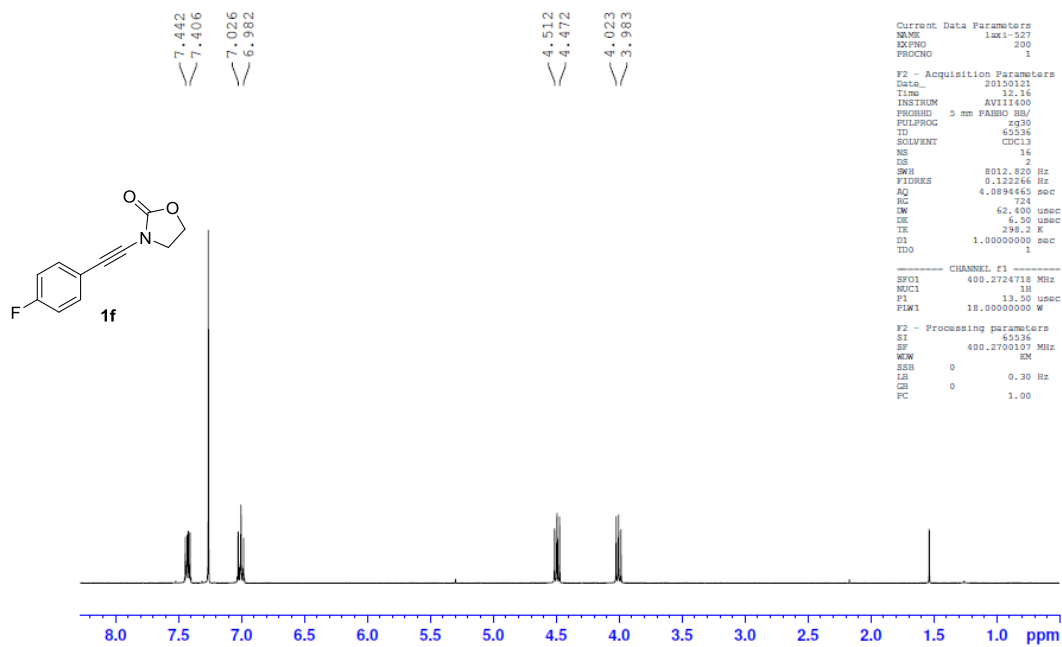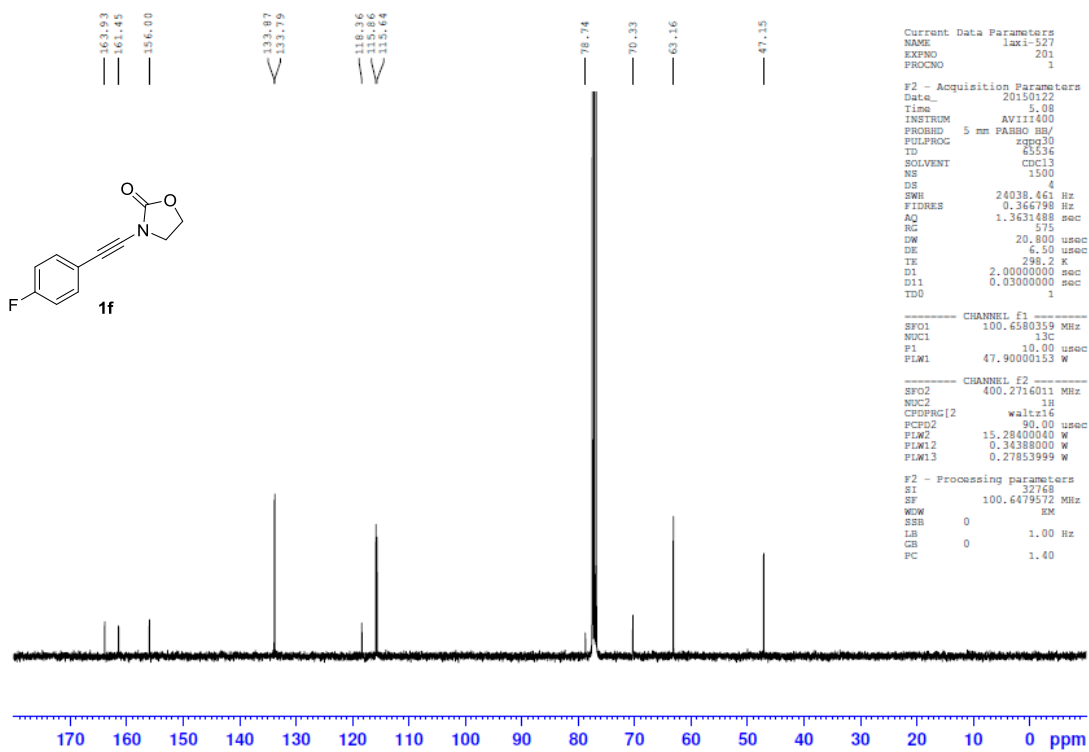

Supplementary Figure 6.  $^1\text{H}$  NMR and  $^{13}\text{C}$  NMR spectra of substrate **1f**

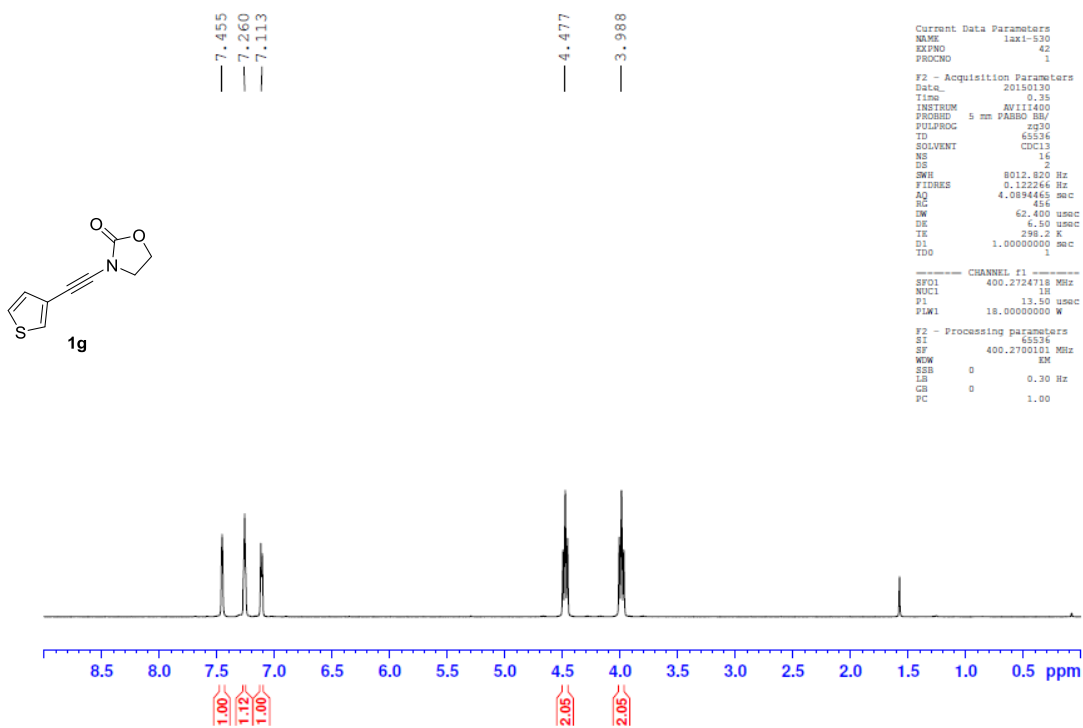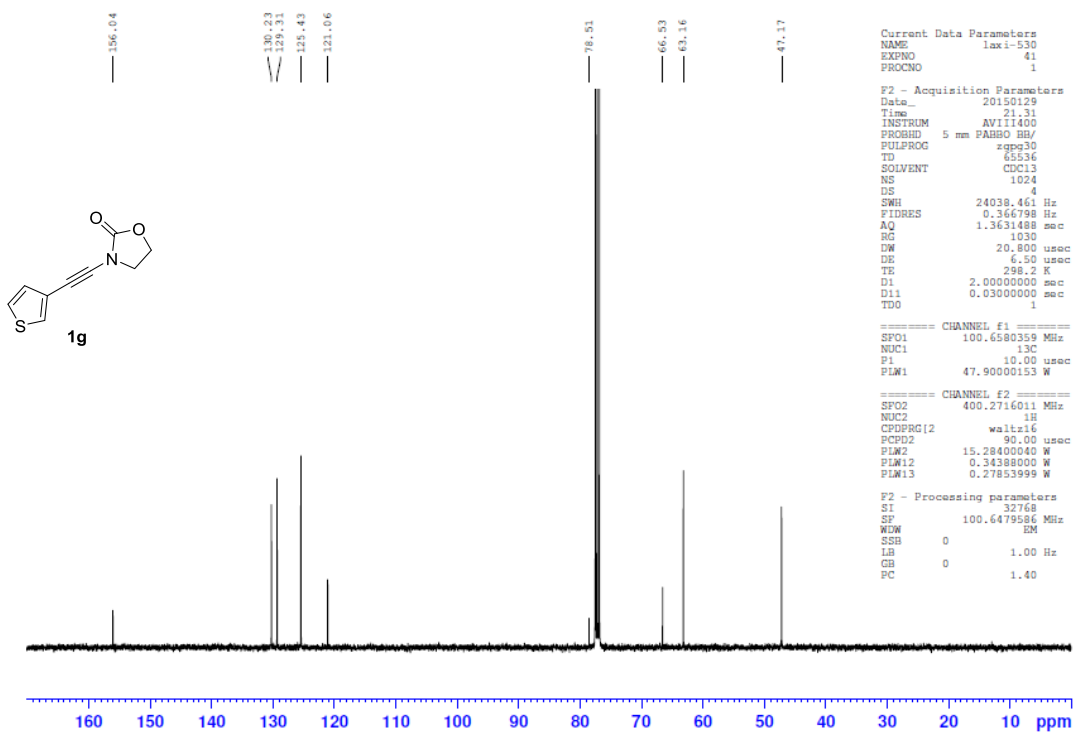

Supplementary Figure 7.  $^1\text{H}$  NMR and  $^{13}\text{C}$  NMR spectra of substrate **1g**

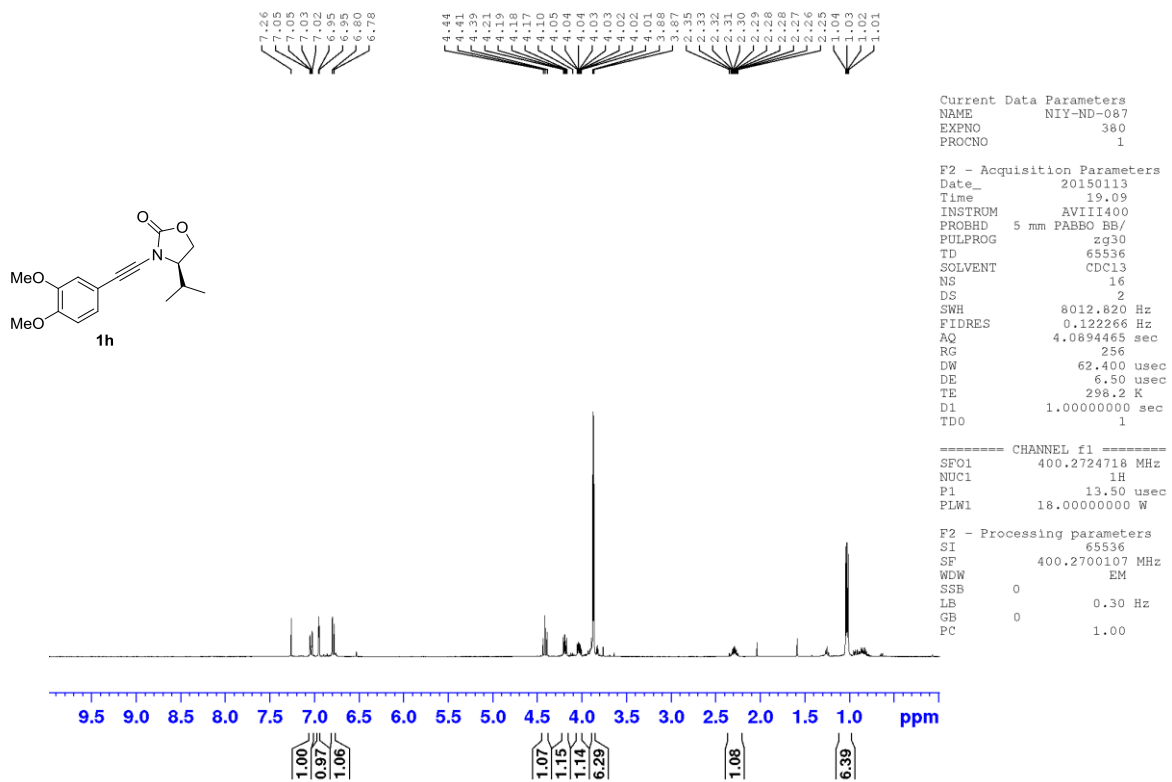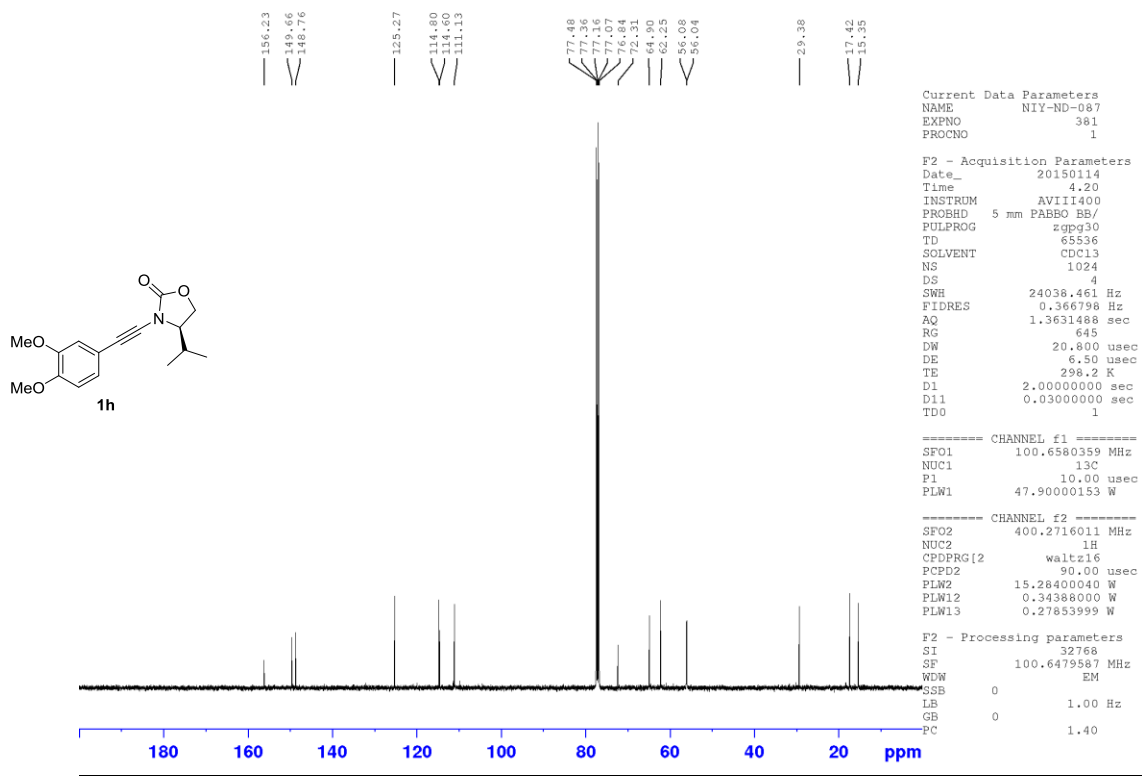

Supplementary Figure 8. <sup>1</sup>H NMR and <sup>13</sup>C NMR spectra of substrate **1h**



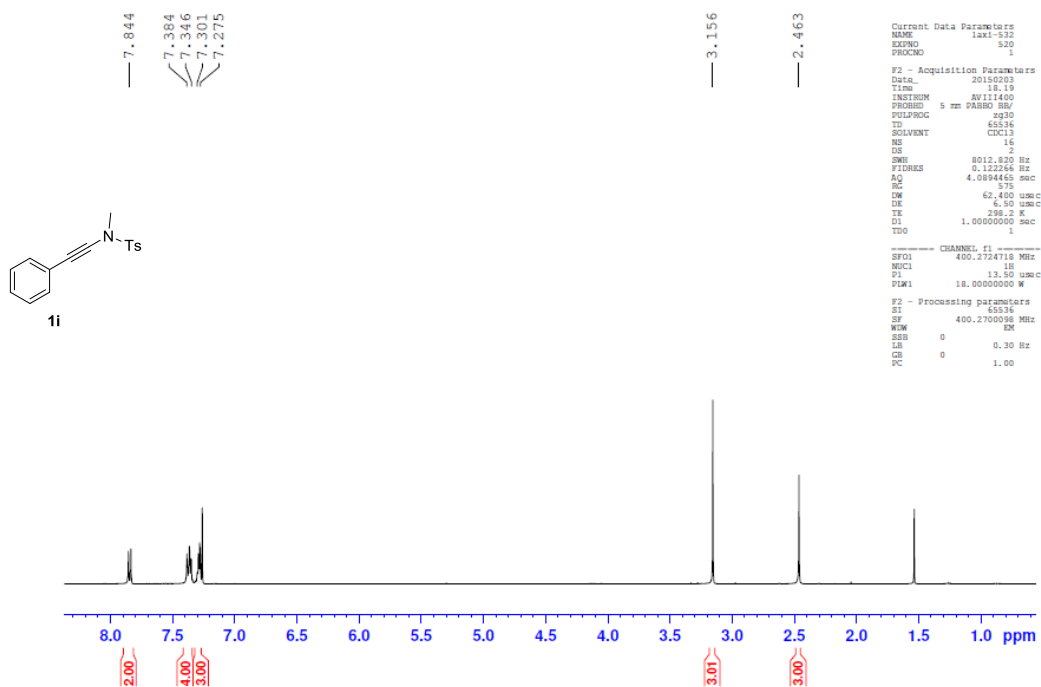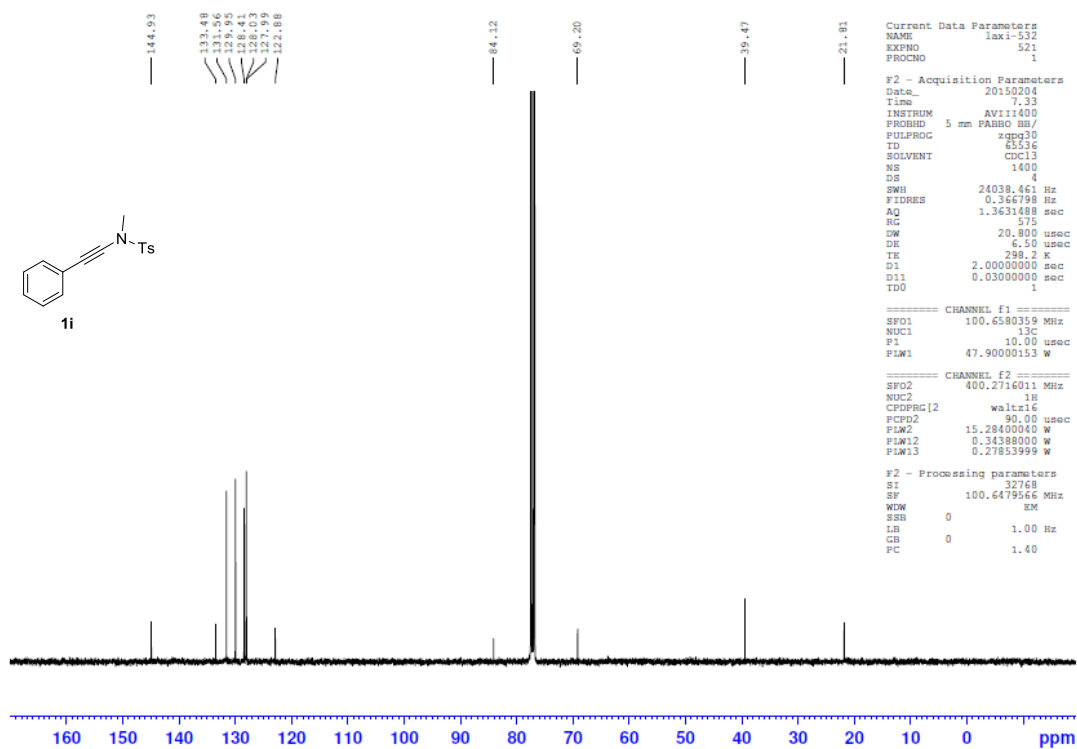

Supplementary Figure 9. <sup>1</sup>H NMR and <sup>13</sup>C NMR spectra of substrate **1i**

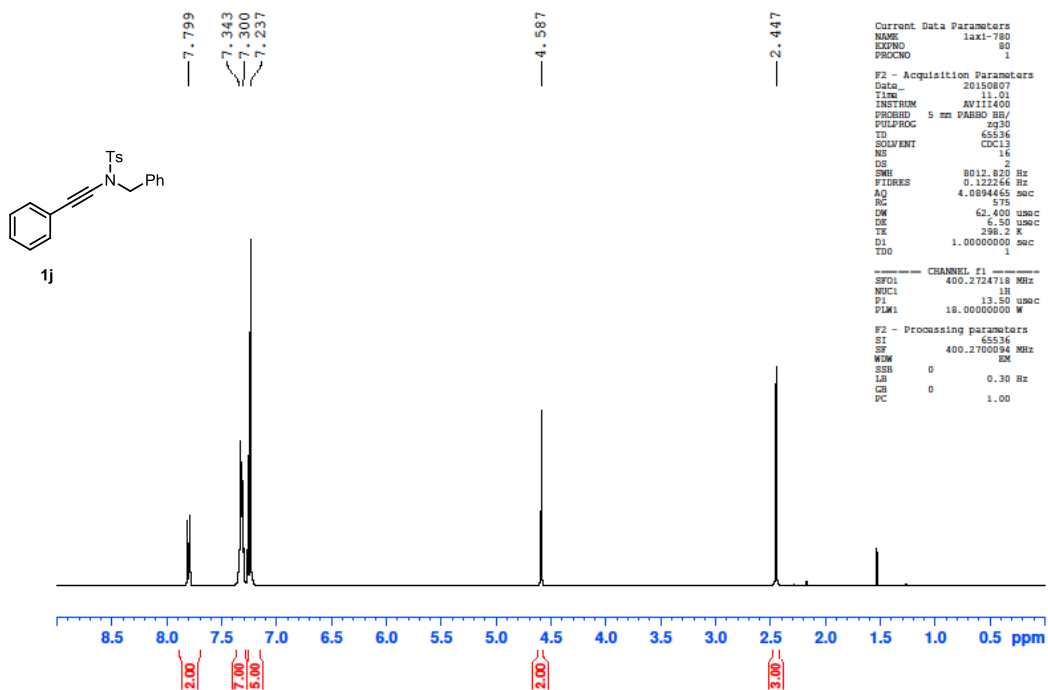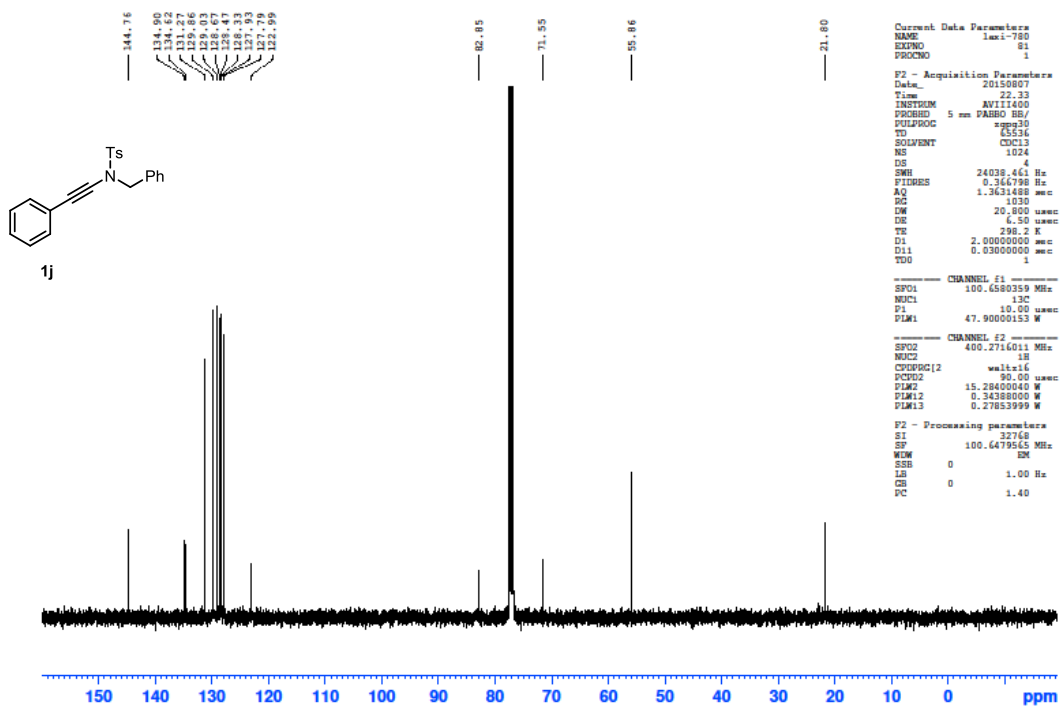

Supplementary Figure 10. <sup>1</sup>H NMR and <sup>13</sup>C NMR spectra of substrate **1j**

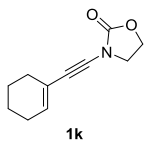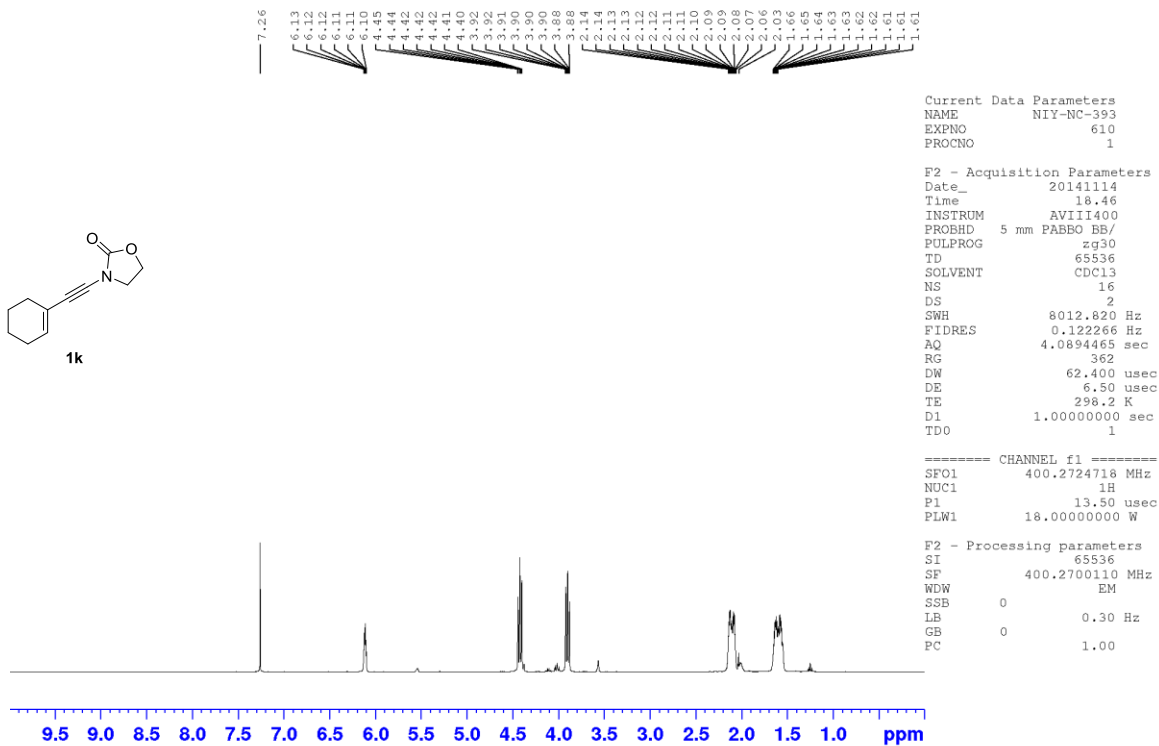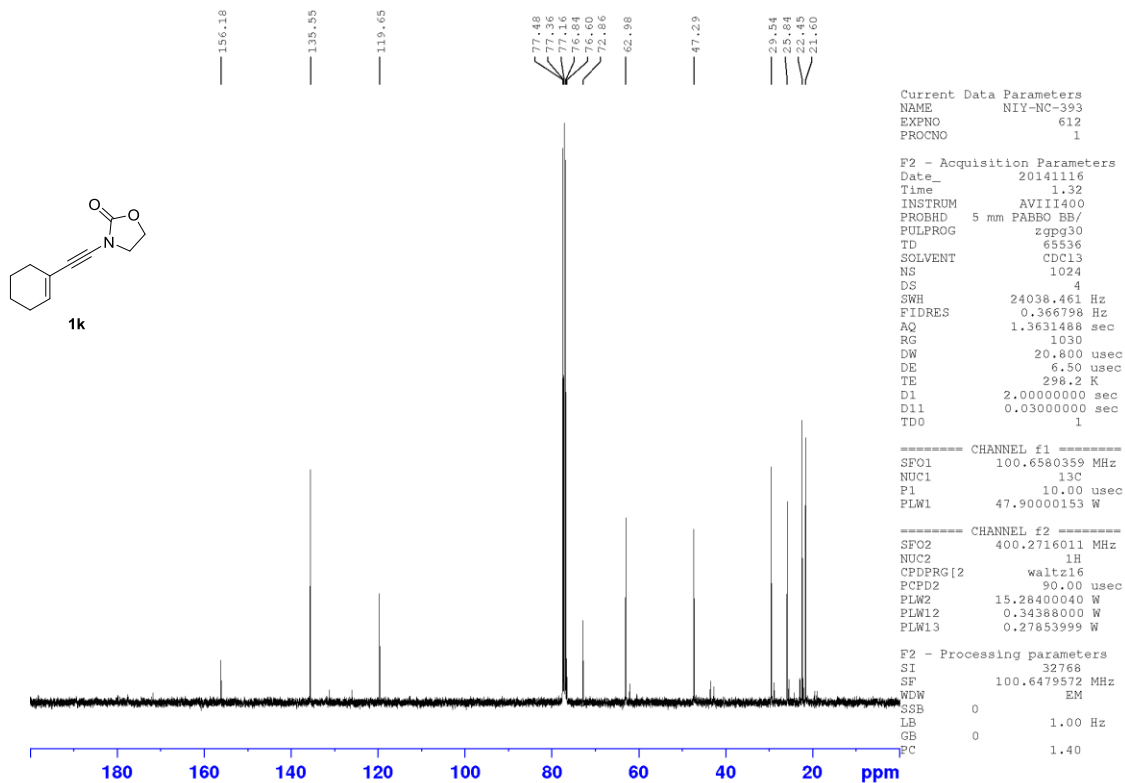

Supplementary Figure 11. <sup>1</sup>H NMR and <sup>13</sup>C NMR spectra of substrate **1k**

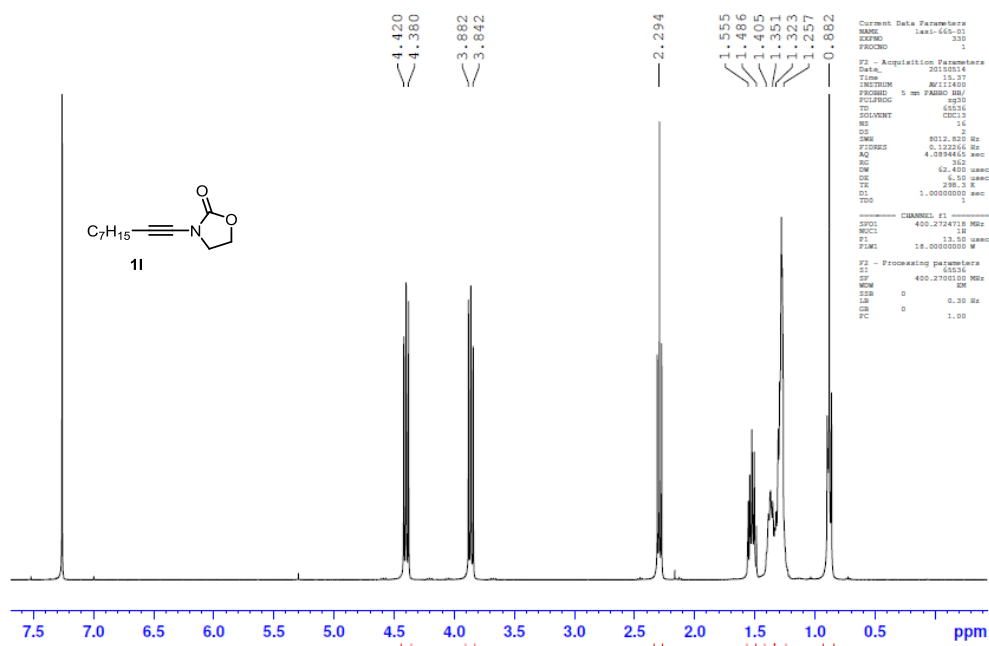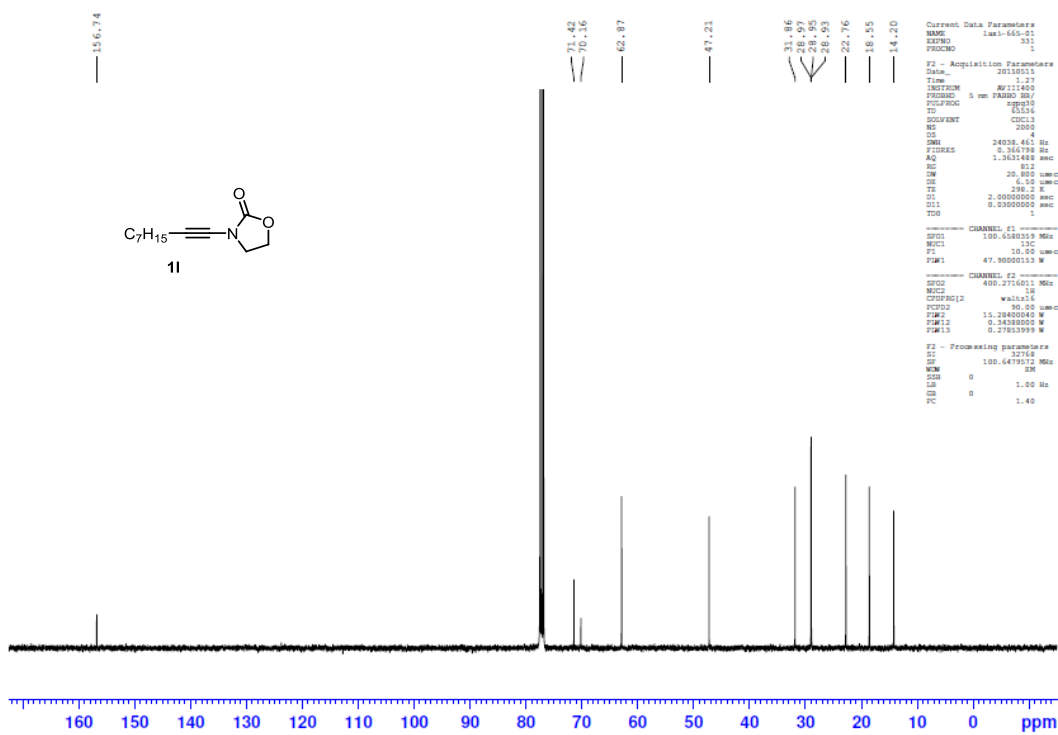

Supplementary Figure 12. <sup>1</sup>H NMR and <sup>13</sup>C NMR spectra of substrate **11**

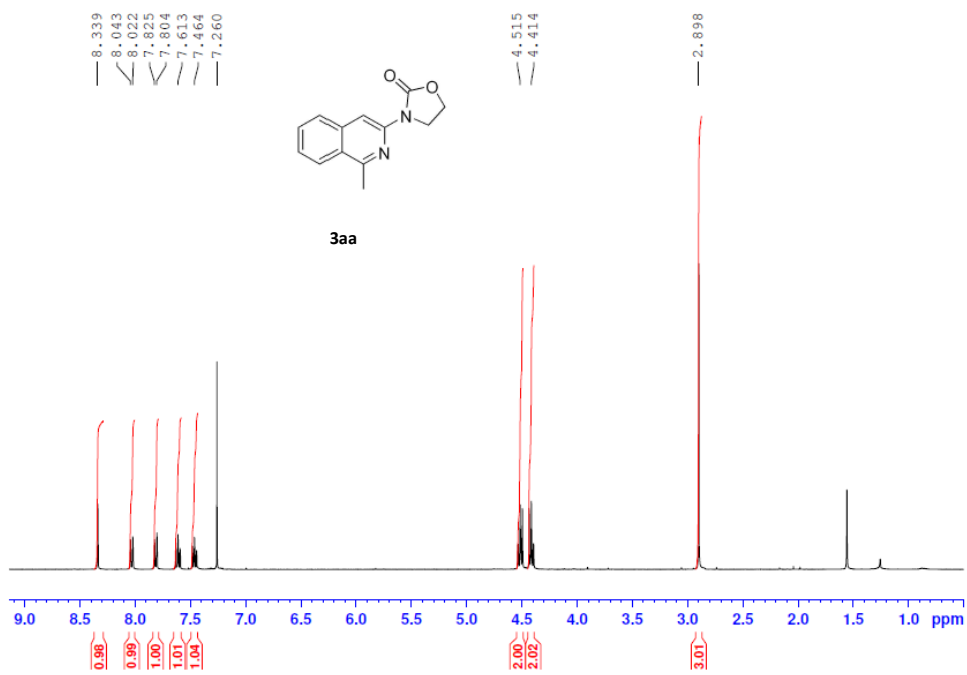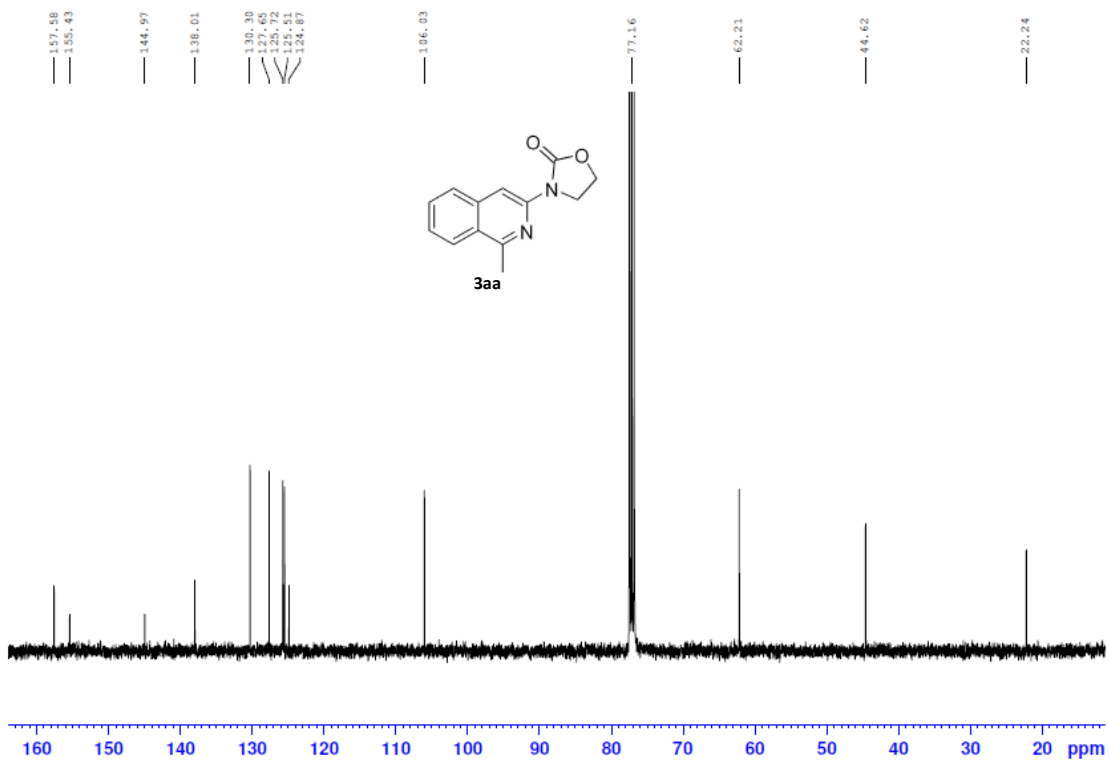

Supplementary Figure 13. <sup>1</sup>H NMR and <sup>13</sup>C NMR spectra of substrate 3aa

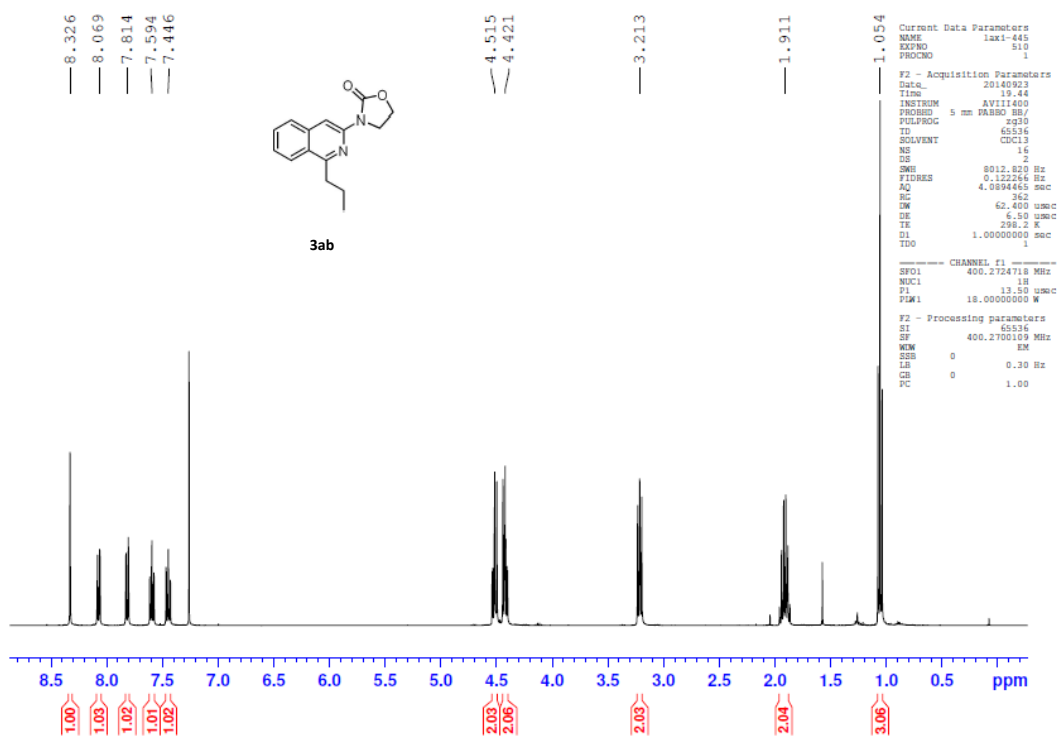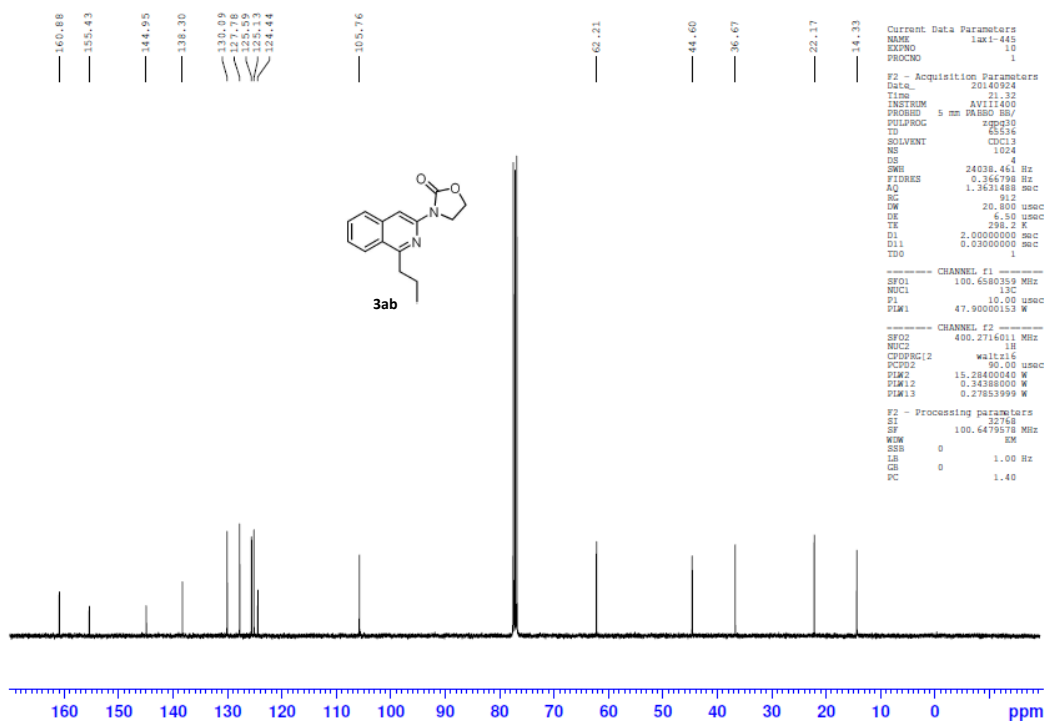

Supplementary Figure 14.  $^1\text{H}$  NMR and  $^{13}\text{C}$  NMR spectra of substrate **3ab**

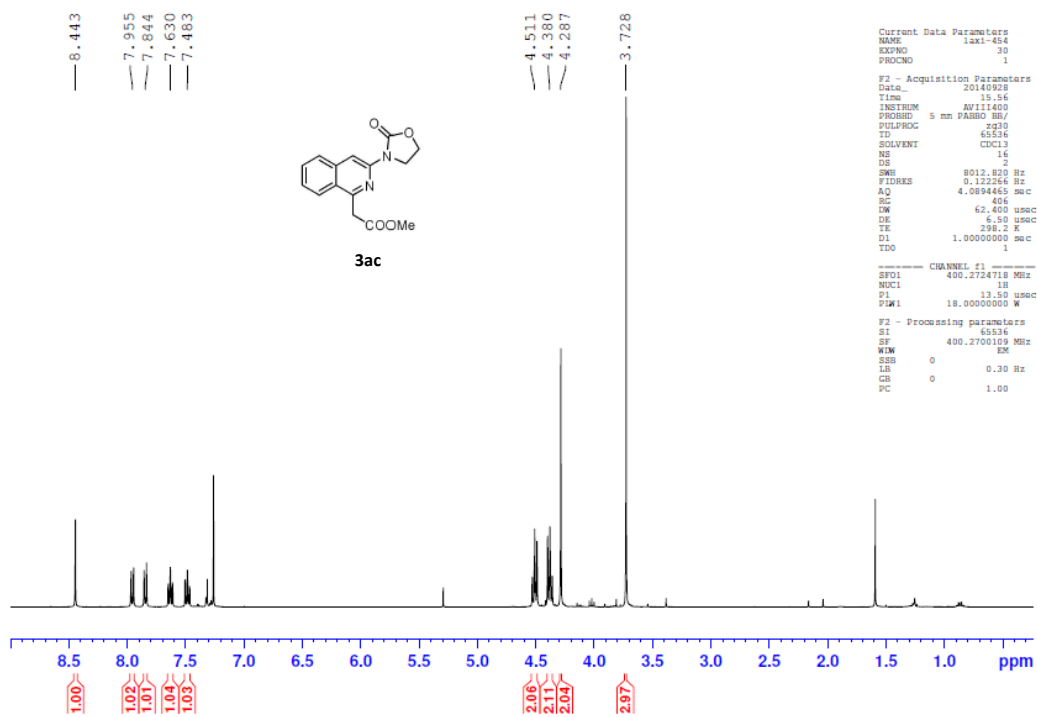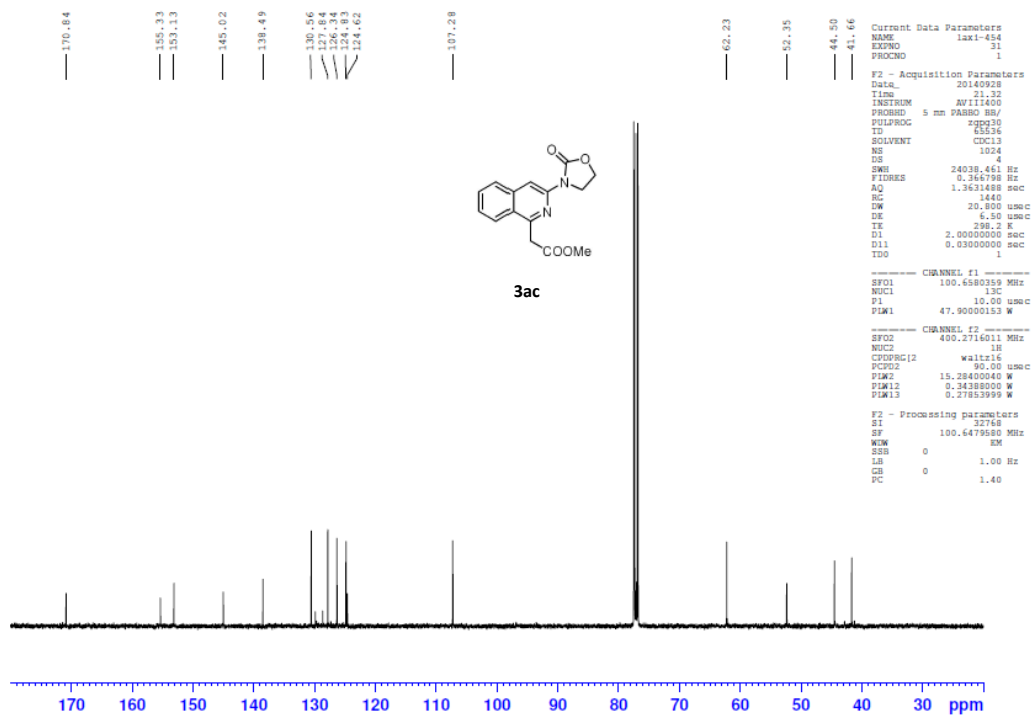

Supplementary Figure 15. <sup>1</sup>H NMR and <sup>13</sup>C NMR spectra of substrate **3ac**

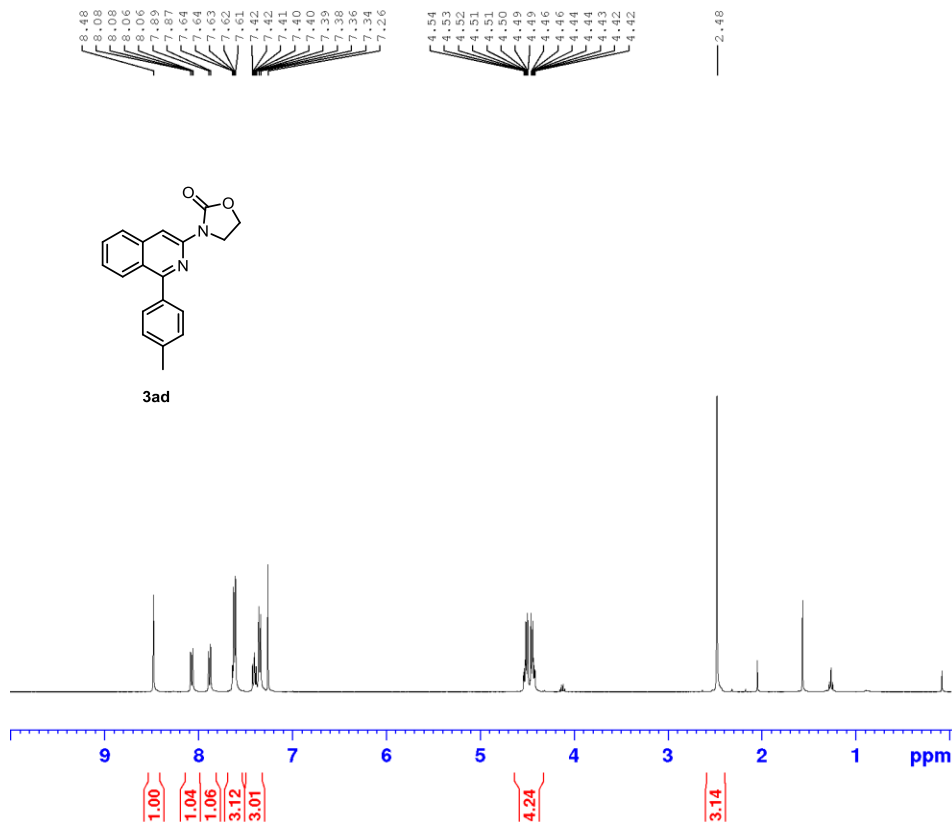

```

Current Data Parameters
NAME      NIY-NC-lax-Me-Ph
EXPNO    450
PROCNO   1

F2 - Acquisition Parameters
Date_    20140926
Time     16.22
INSTRUM  AVIII400
PROBHD   5 mm PABBO BB/
PULPROG  zg30
TD       65536
SOLVENT  CDCl3
NS       16
DS       2
SWH      8012.820 Hz
FIDRES   0.122266 Hz
AQ       4.0894465 sec
RG       456
DW       62.400 usec
DE       6.50 usec
TE       298.2 K
D1       1.00000000 sec
TD0      1

===== CHANNEL f1 =====
SFO1     400.2724718 MHz
NUC1     1H
P1       13.50 usec
PLW1     18.00000000 W

F2 - Processing parameters
SI       65536
SF       400.2700107 MHz
WDW      EM
SSB      0
LB       0.30 Hz
GB       0
PC       1.00
  
```

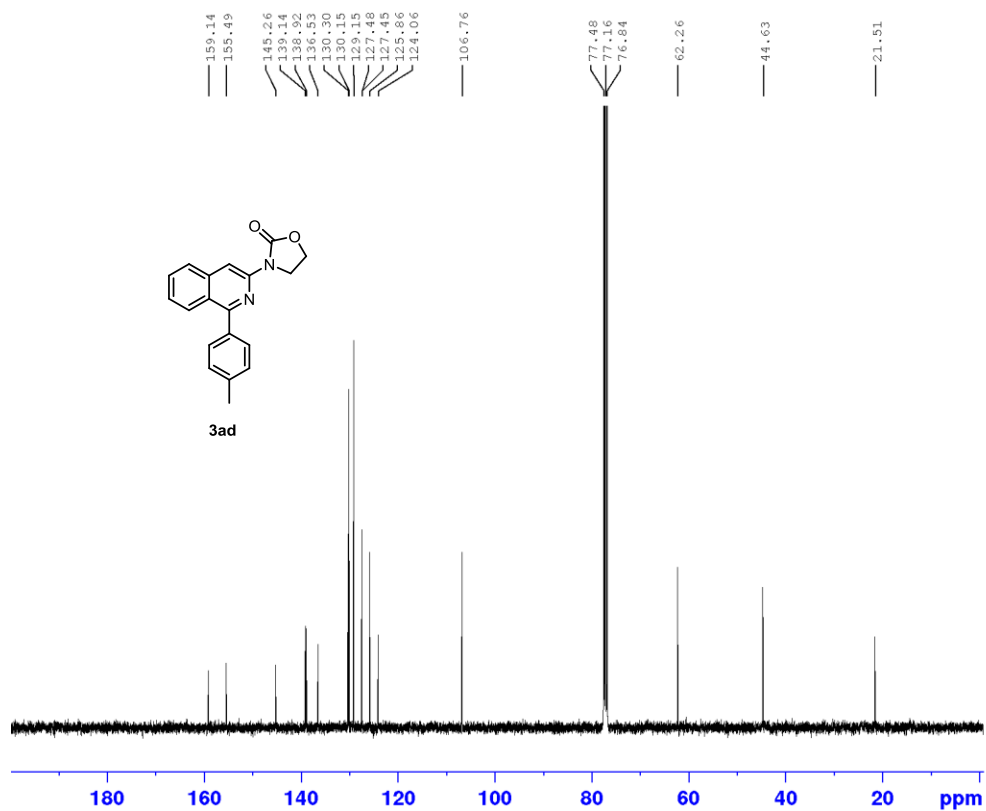

```

Current Data Parameters
NAME      NIY-NC-lax-Me-Ph
EXPNO    452
PROCNO   1

F2 - Acquisition Parameters
Date_    20140927
Time     4.08
INSTRUM  AVIII400
PROBHD   5 mm PABBO BB/
PULPROG  zgpg30
TD       65536
SOLVENT  CDCl3
NS       1024
DS       4
SWH      24038.461 Hz
FIDRES   0.366798 Hz
AQ       1.3631488 sec
RG       912
DW       20.800 usec
DE       6.50 usec
TE       298.2 K
D1       2.00000000 sec
D11      0.03000000 sec
TD0      1

===== CHANNEL f1 =====
SFO1     100.6580359 MHz
NUC1     13C
P1       10.00 usec
PLW1     47.90000153 W

===== CHANNEL f2 =====
SFO2     400.2716011 MHz
NUC2     1H
CPDPRG[2] waltz16
PCPD2    90.00 usec
PLW2     15.28400040 W
PLW12    0.34388000 W
PLW13    0.27853999 W

F2 - Processing parameters
SI       32768
SF       100.6479577 MHz
WDW      EM
SSB      0
LB       1.00 Hz
GB       0
PC       1.40
  
```

Supplementary Figure 16. <sup>1</sup>H NMR and <sup>13</sup>C NMR spectra of substrate **3ad**





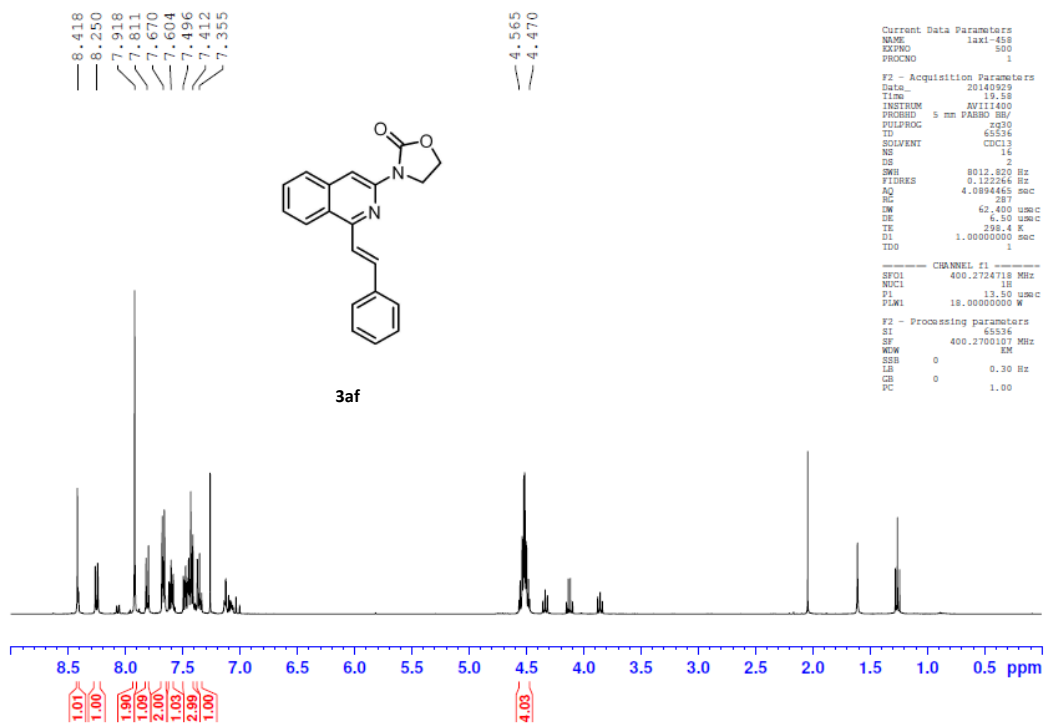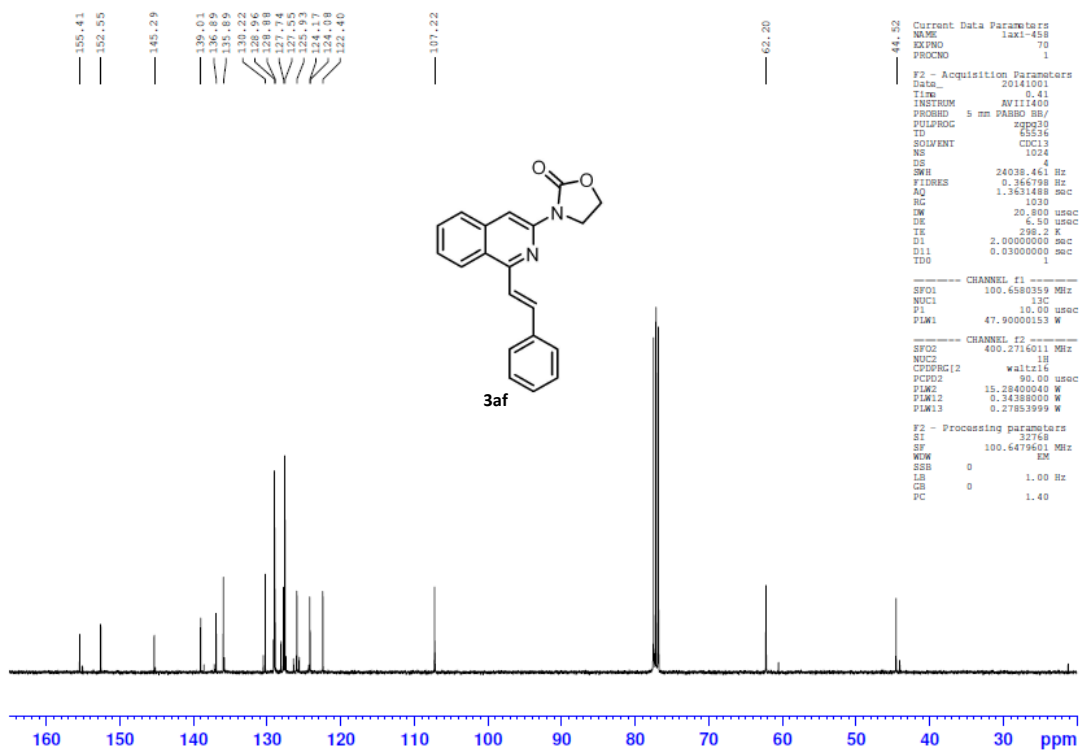

Supplementary Figure 18. <sup>1</sup>H NMR and <sup>13</sup>C NMR spectra of substrate **3af**

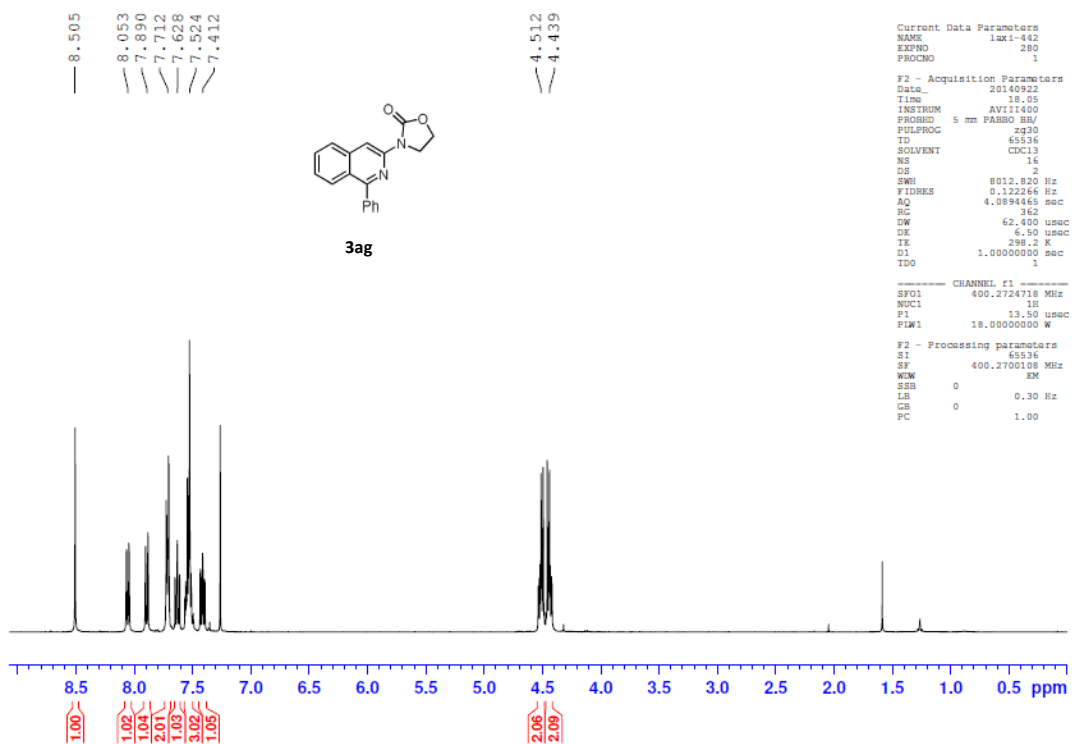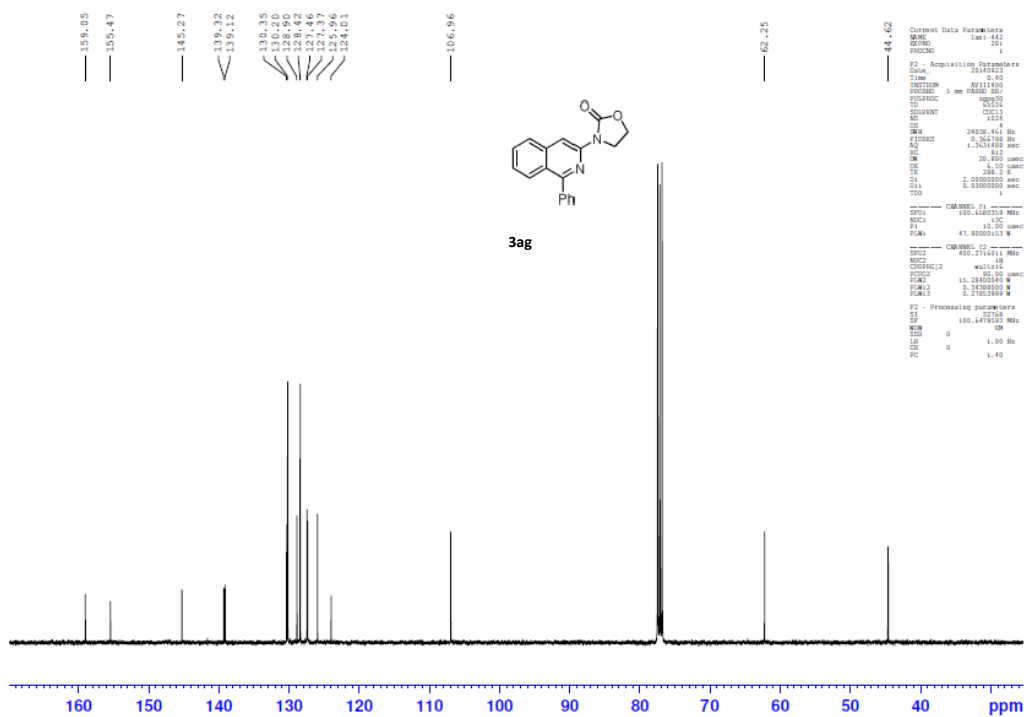

Supplementary Figure 19. <sup>1</sup>H NMR and <sup>13</sup>C NMR spectra of substrate **3ag**

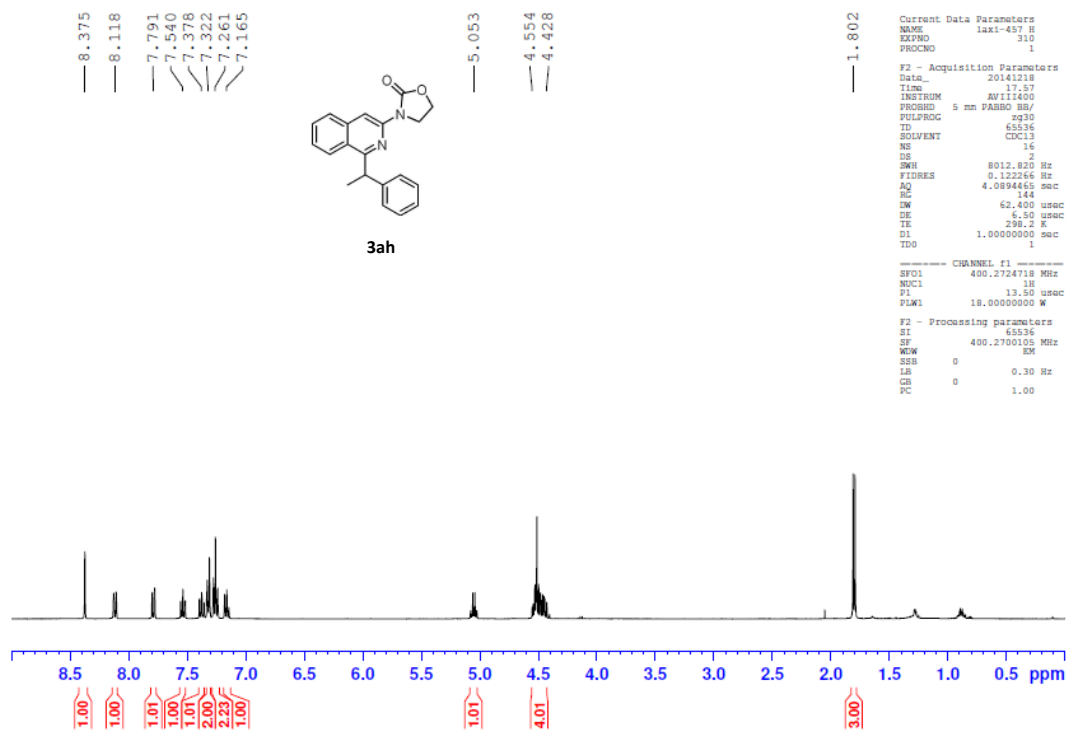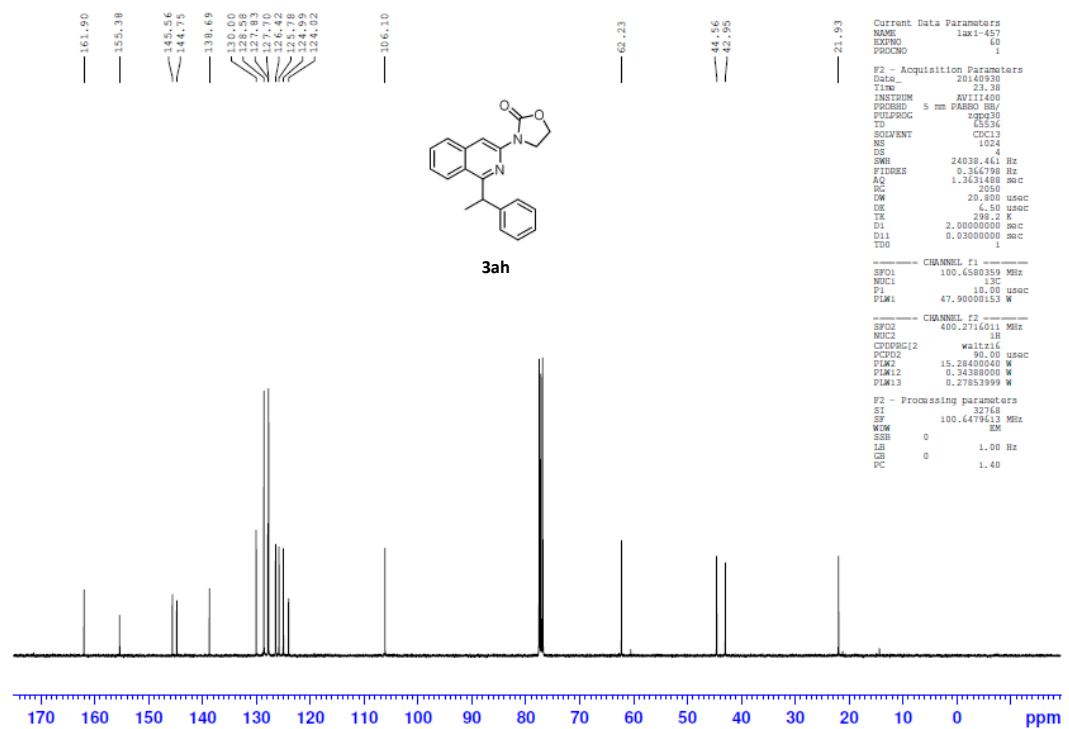

Supplementary Figure 20. <sup>1</sup>H NMR and <sup>13</sup>C NMR spectra of substrate **3ah**

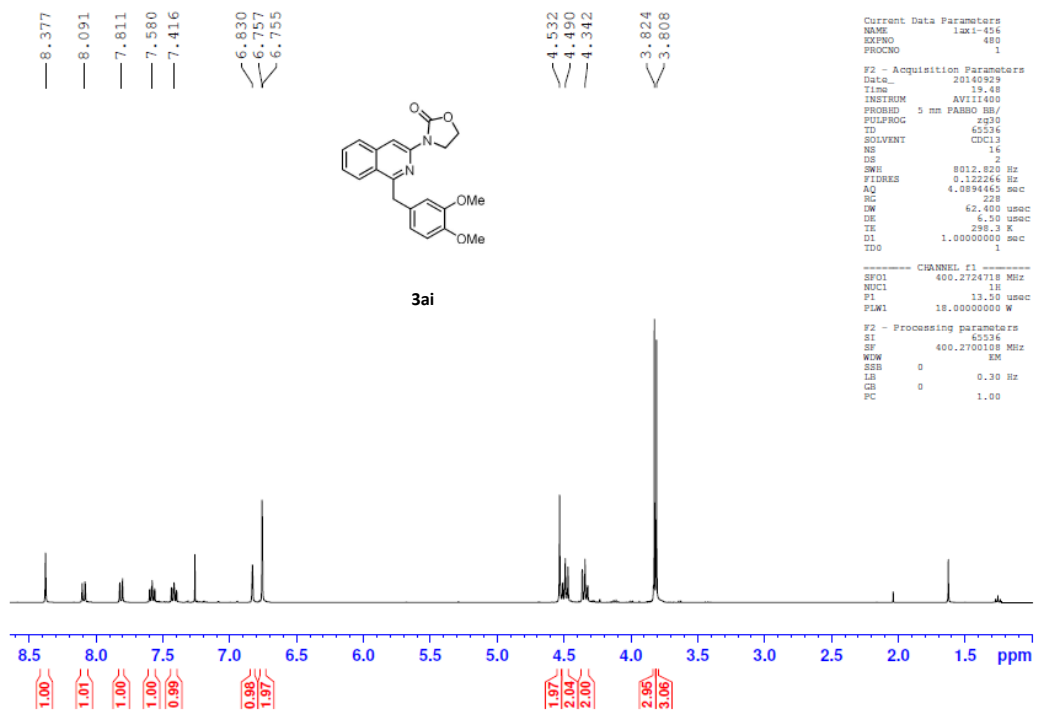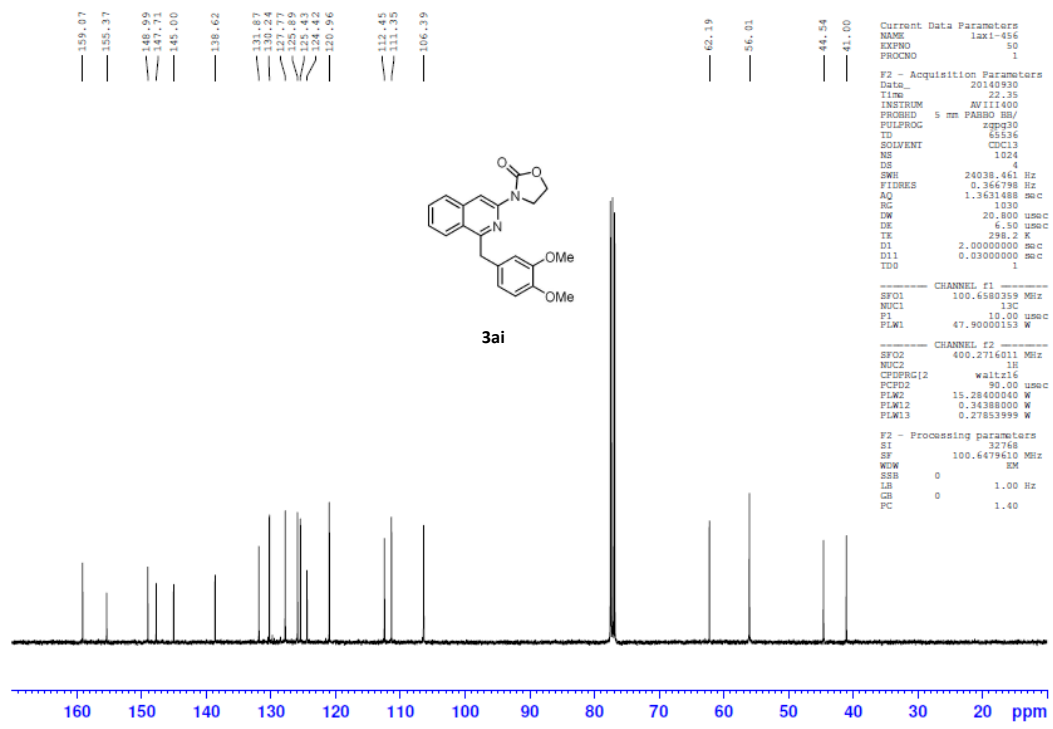

Supplementary Figure 21. <sup>1</sup>H NMR and <sup>13</sup>C NMR spectra of substrate **3ai**

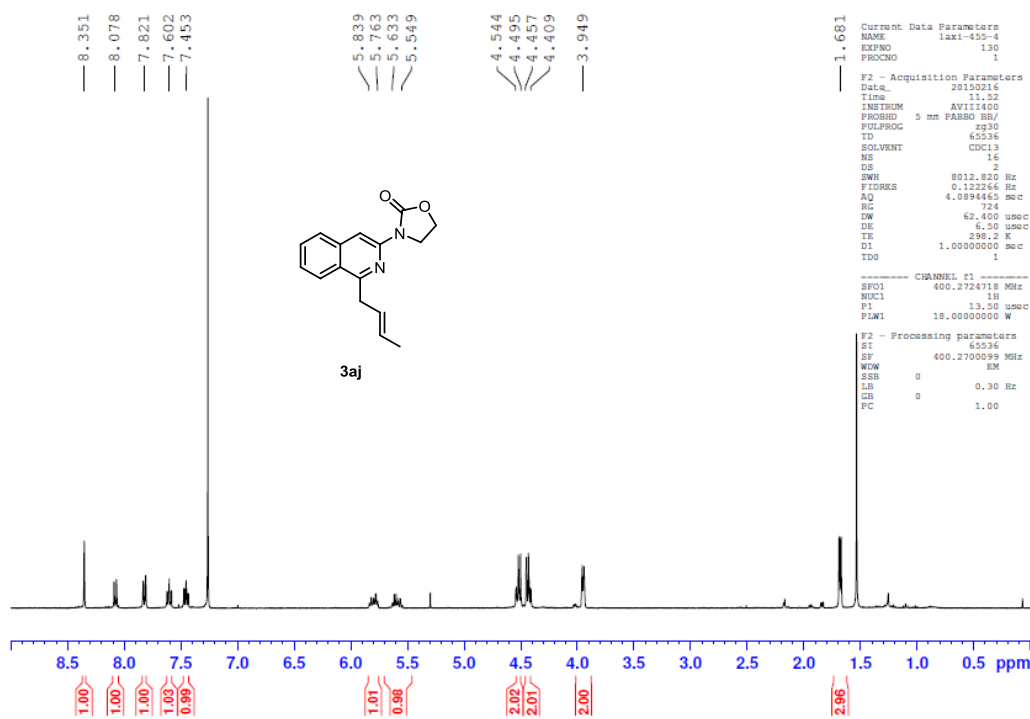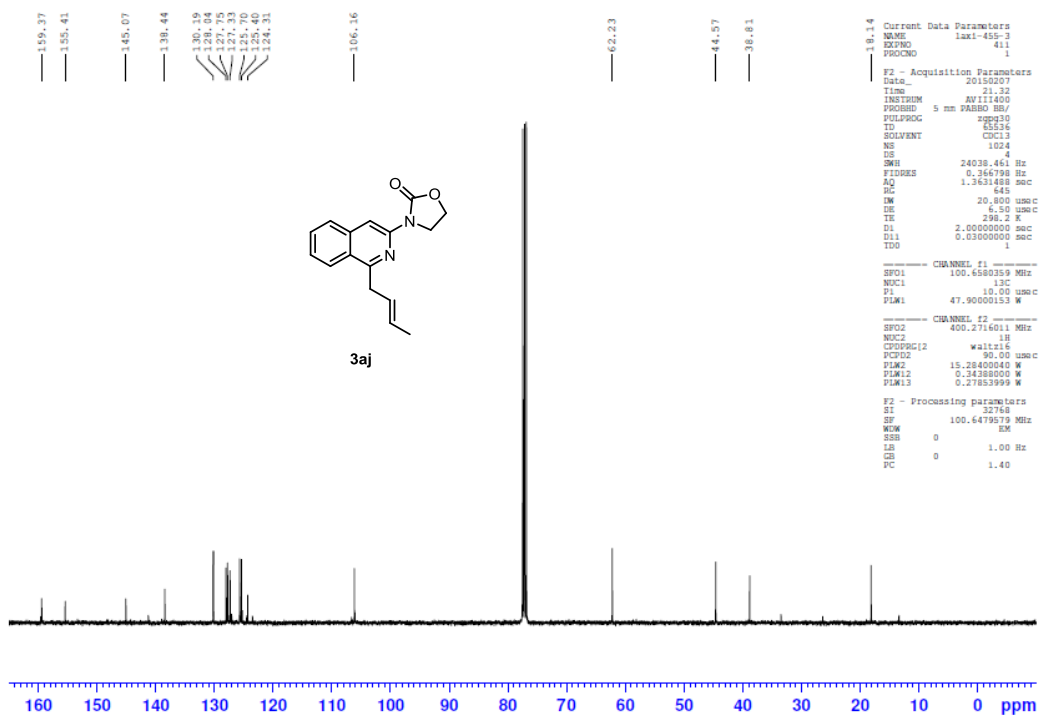

Supplementary Figure 22. <sup>1</sup>H NMR and <sup>13</sup>C NMR spectra of substrate **3aj**

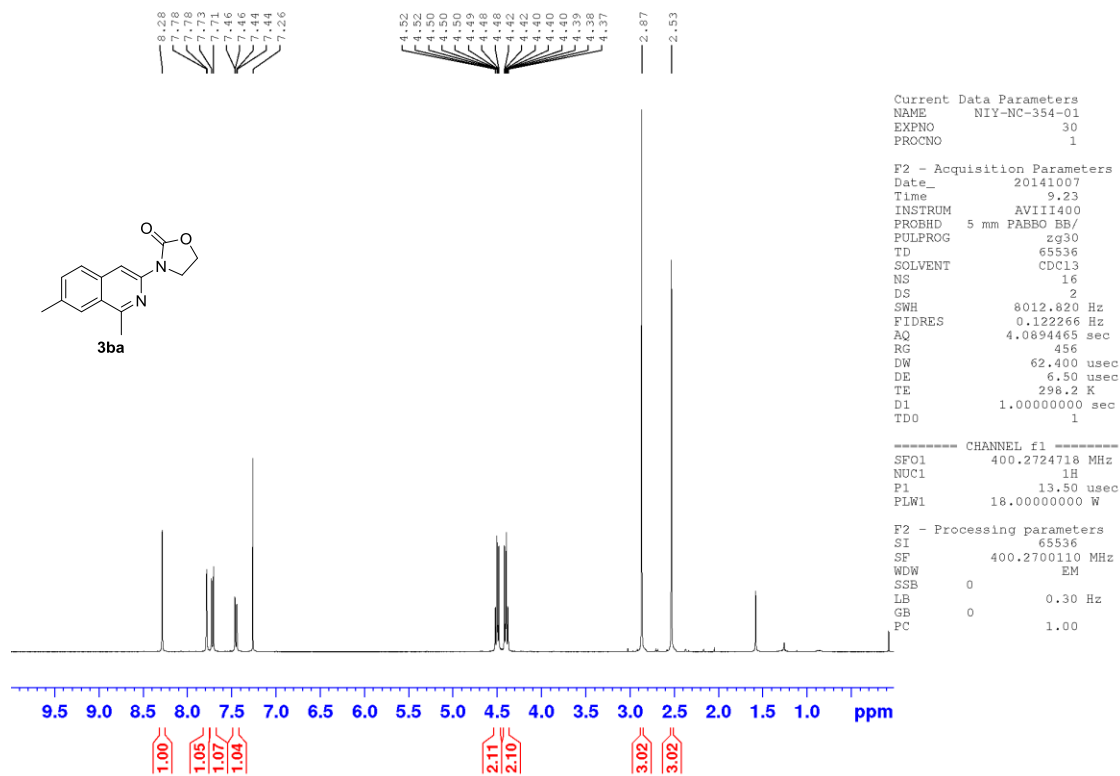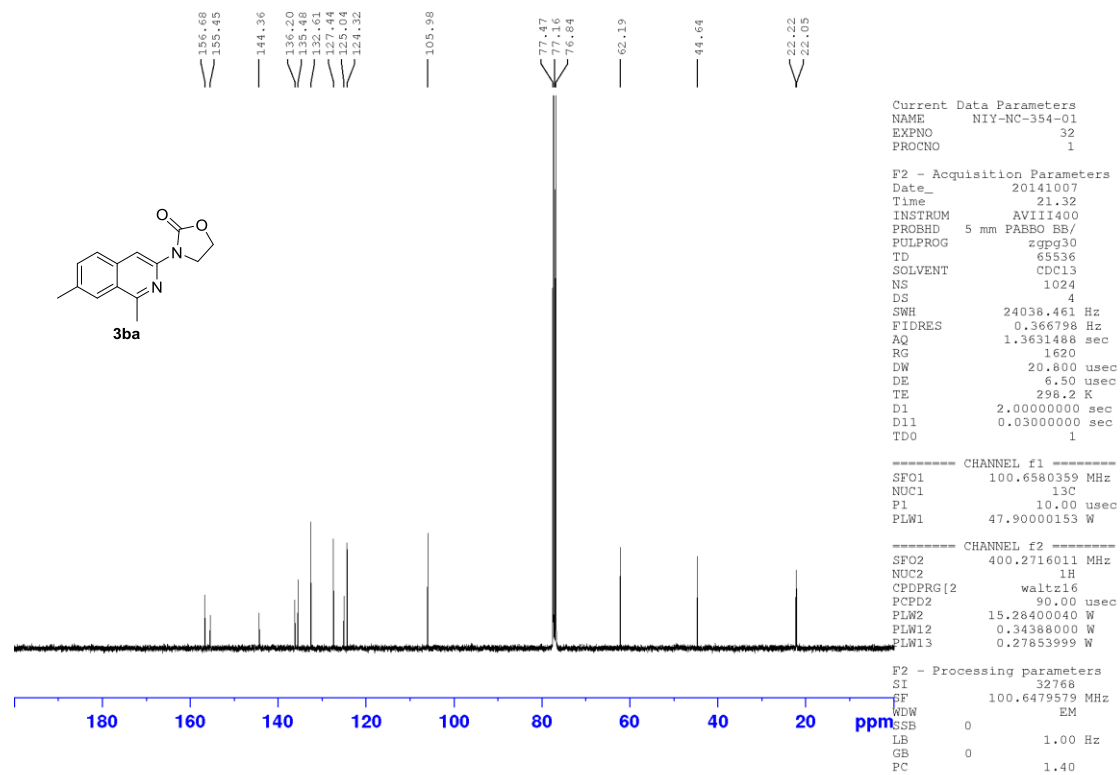

Supplementary Figure 23. <sup>1</sup>H NMR and <sup>13</sup>C NMR spectra of substrate **3ba**

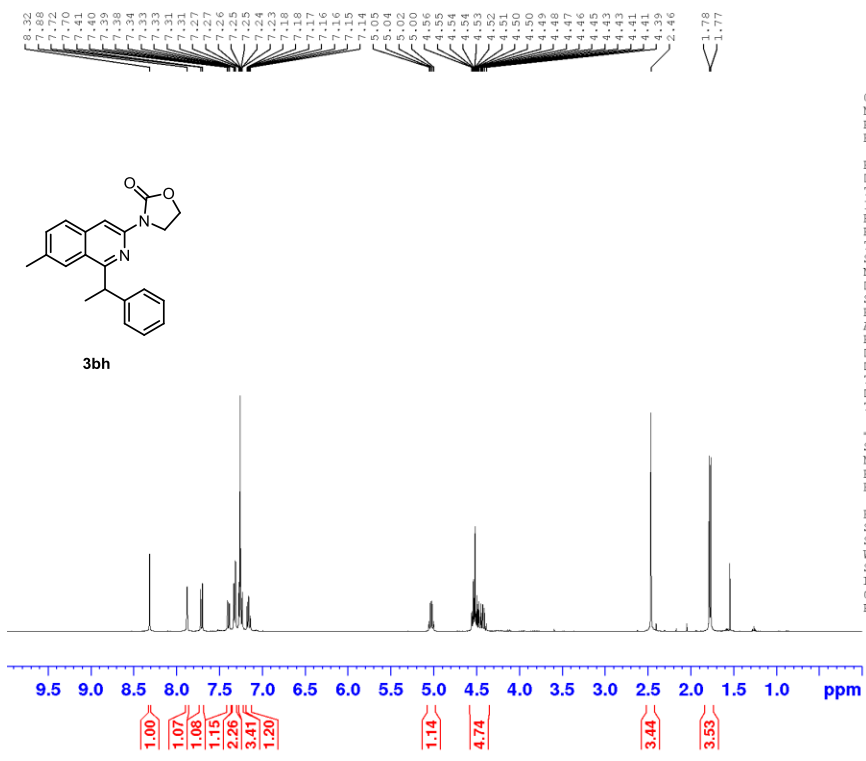

```

Current Data Parameters
NAME      NIY-ND-016
EXPNO    80
PROCNO   1

F2 - Acquisition Parameters
Date_    20141203
Time     12.02
INSTRUM  AVIII400
PROBHD   5 mm PABBO BB/
PULPROG  zg30
TD        65536
SOLVENT  CDCl3
NS        16
DS        2
SWH       8012.820 Hz
FIDRES    0.122266 Hz
AQ        4.0894465 sec
RG        512
DW        62.400 usec
DE        6.50 usec
TE        298.2 K
D1        1.00000000 sec
TD0       1

----- CHANNEL f1 -----
SFO1     400.2724718 MHz
NUC1     1H
P1       13.50 usec
PLW1     18.00000000 W

F2 - Processing parameters
SI        65536
SF        400.2700109 MHz
WDW       EM
SSB       0
LB        0.30 Hz
GB        0
PC        1.00

```

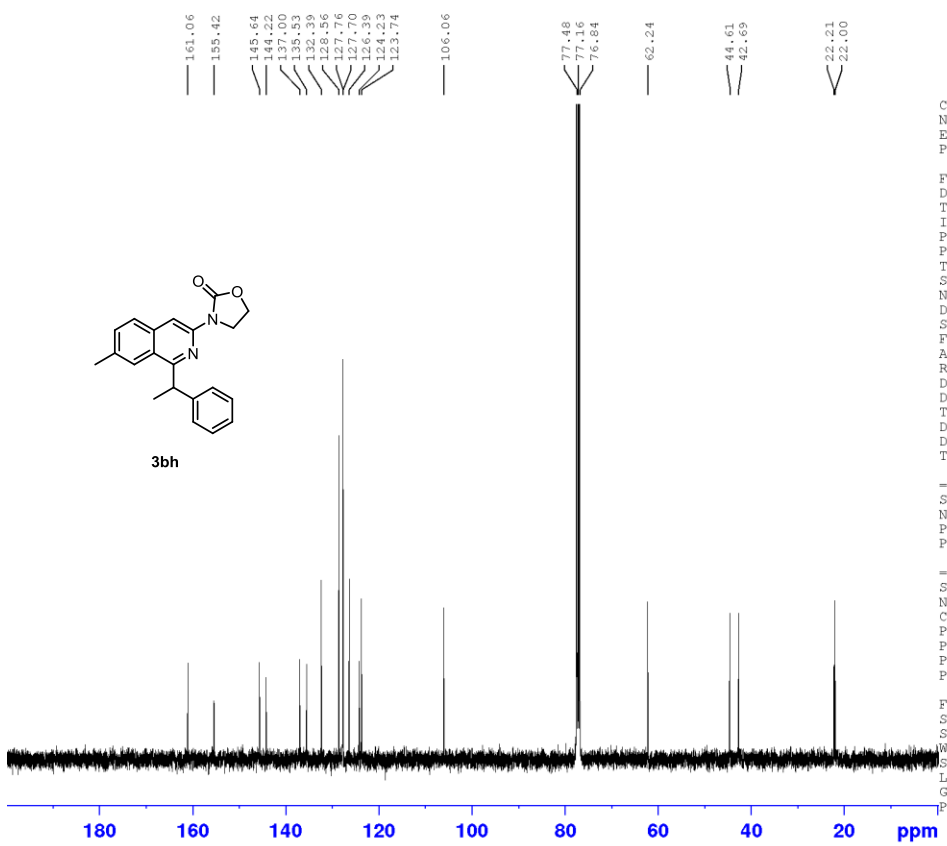

```

Current Data Parameters
NAME      NIY-ND-016
EXPNO    82
PROCNO   1

F2 - Acquisition Parameters
Date_    20141204
Time     4.33
INSTRUM  AVIII400
PROBHD   5 mm PABBO BB/
PULPROG  zgpg30
TD        65536
SOLVENT  CDCl3
NS        1024
DS        4
SWH       24038.461 Hz
FIDRES    0.366798 Hz
AQ        1.3631488 sec
RG        912
DW        20.800 usec
DE        6.50 usec
TE        298.2 K
D1        2.00000000 sec
D11       0.03000000 sec
TD0       1

----- CHANNEL f1 -----
SFO1     100.6580359 MHz
NUC1     13C
P1       10.00 usec
PLW1     47.90000153 W

----- CHANNEL f2 -----
SFO2     400.2716011 MHz
NUC2     1H
CPDPRG[2] waltz16
PCPD2    90.00 usec
PLW2     15.28400040 W
PLW12    0.34388000 W
PLW13    0.27853999 W

F2 - Processing parameters
SI        32768
SF        100.6479572 MHz
WDW       EM
SSB       0
LB        1.00 Hz
GB        0
PC        1.40

```

Supplementary Figure 24. <sup>1</sup>H NMR and <sup>13</sup>C NMR spectra of substrate 3bh



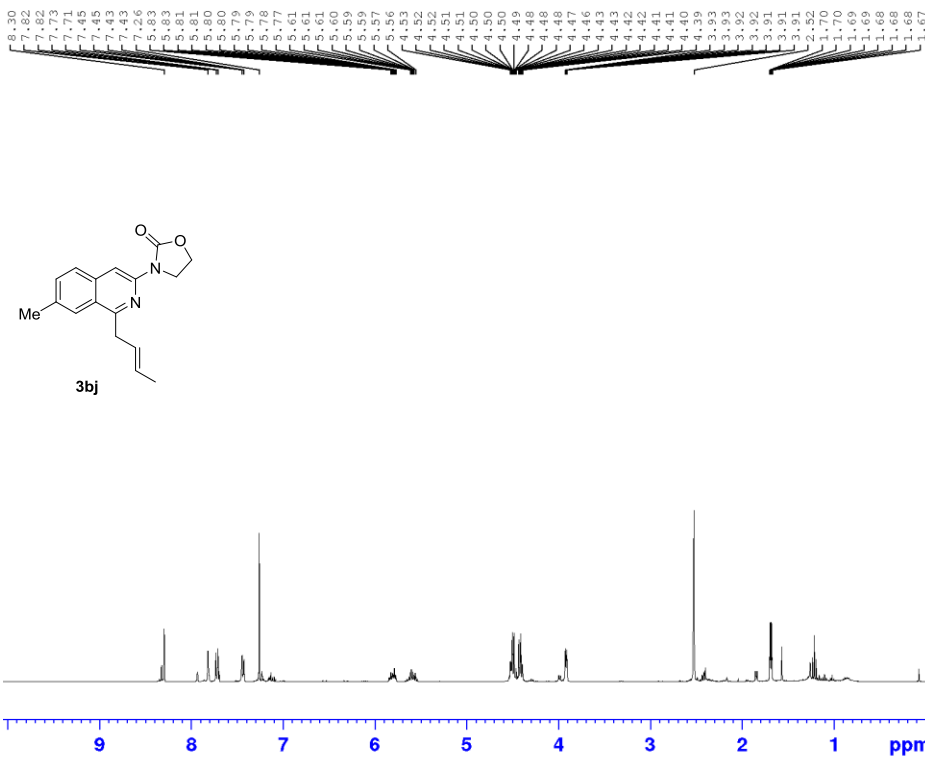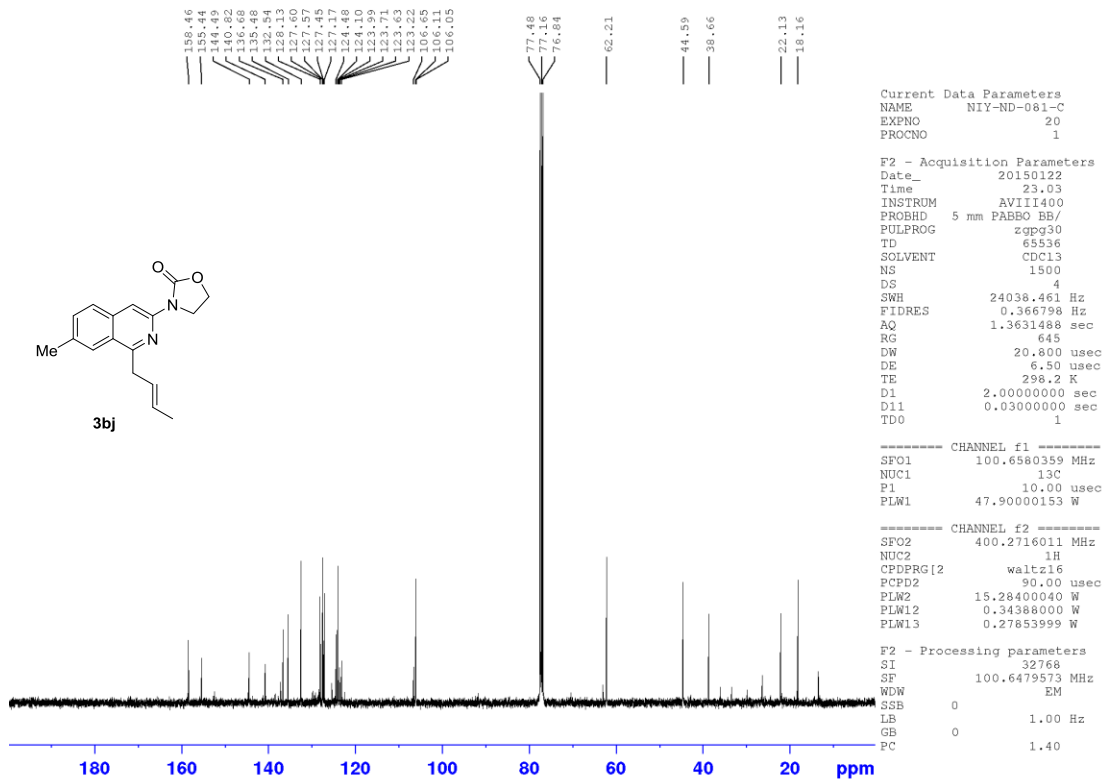

Supplementary Figure 25. <sup>1</sup>H NMR and <sup>13</sup>C NMR spectra of substrate **3bj**

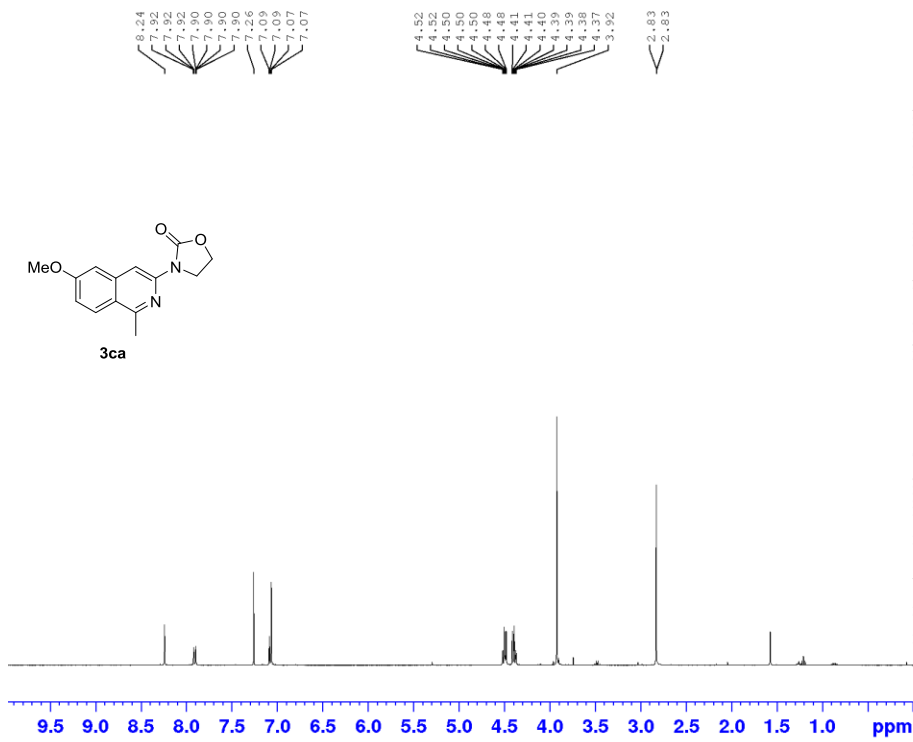

Current Data Parameters  
 NAME NIY-NC-374  
 EXPNO 680  
 PROCNO 1

F2 - Acquisition Parameters  
 Date\_ 20141031  
 Time\_ 5.48  
 INSTRUM AVII1400  
 PROBHD 5 mm PABBO BB/  
 PULPROG zg30  
 TD 65536  
 SOLVENT CDCl3  
 NS 16  
 DS 2  
 SWH 8012.820 Hz  
 FIDRES 0.122266 Hz  
 AQ 4.0894465 sec  
 RG 512  
 DW 62.400 usec  
 DE 6.50 usec  
 TE 298.2 K  
 D1 1.00000000 sec  
 TDO 1

----- CHANNEL f1 -----  
 SFO1 400.2724718 MHz  
 NUC1 1H  
 P1 13.50 usec  
 PLW1 18.00000000 W

F2 - Processing parameters  
 SI 65536  
 SF 400.2700110 MHz  
 WDW EM  
 SSB 0  
 LB 0.30 Hz  
 GB 0  
 PC 1.00

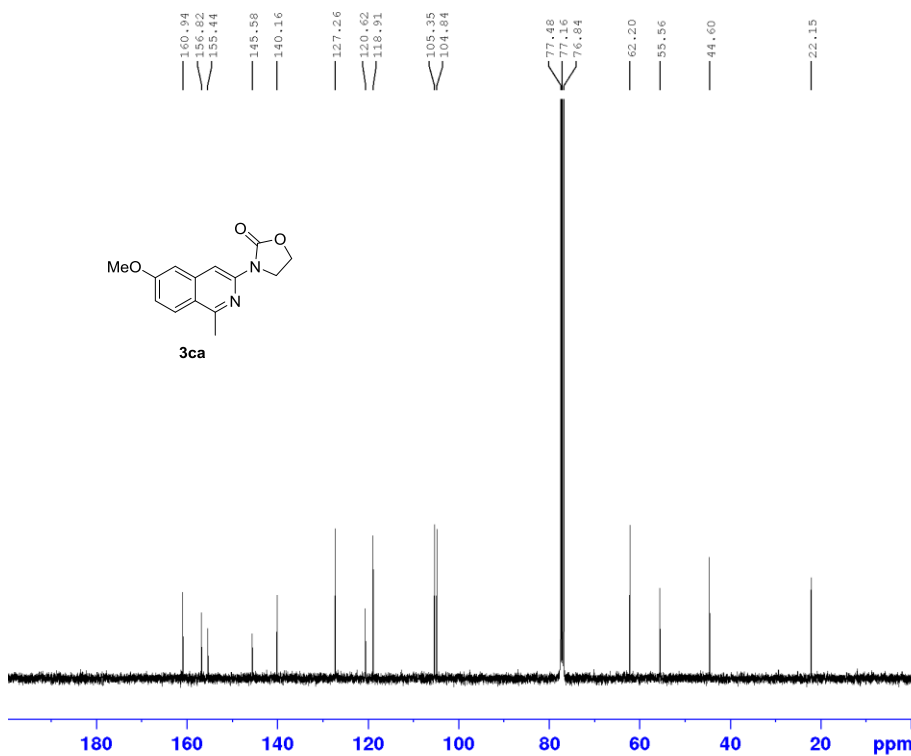

Current Data Parameters  
 NAME NIY-NC-374  
 EXPNO 52  
 PROCNO 1

F2 - Acquisition Parameters  
 Date\_ 20141026  
 Time\_ 2.49  
 INSTRUM AVII1400  
 PROBHD 5 mm PABBO BB/  
 PULPROG zgpg30  
 TD 65536  
 SOLVENT CDCl3  
 NS 1024  
 DS 4  
 SWH 24038.461 Hz  
 FIDRES 0.366798 Hz  
 AQ 1.3631488 sec  
 RG 724  
 DW 20.800 usec  
 DE 6.50 usec  
 TE 298.2 K  
 D1 2.00000000 sec  
 D11 0.03000000 sec  
 TDO 1

----- CHANNEL f1 -----  
 SFO1 100.6580359 MHz  
 NUC1 13C  
 P1 10.00 usec  
 PLW1 47.90000153 W

----- CHANNEL f2 -----  
 SFO2 400.2716011 MHz  
 NUC2 1H  
 CPDPRG2 waltz16  
 PCPD2 90.00 usec  
 PLW2 15.28400040 W  
 PLW12 0.34388000 W  
 PLW13 0.27853999 W

F2 - Processing parameters  
 SI 32768  
 SF 100.6479572 MHz  
 WDW EM  
 SSB 0  
 LB 1.00 Hz  
 GB 0  
 PC 1.40

Supplementary Figure 26. <sup>1</sup>H NMR and <sup>13</sup>C NMR spectra of substrate **3ca**

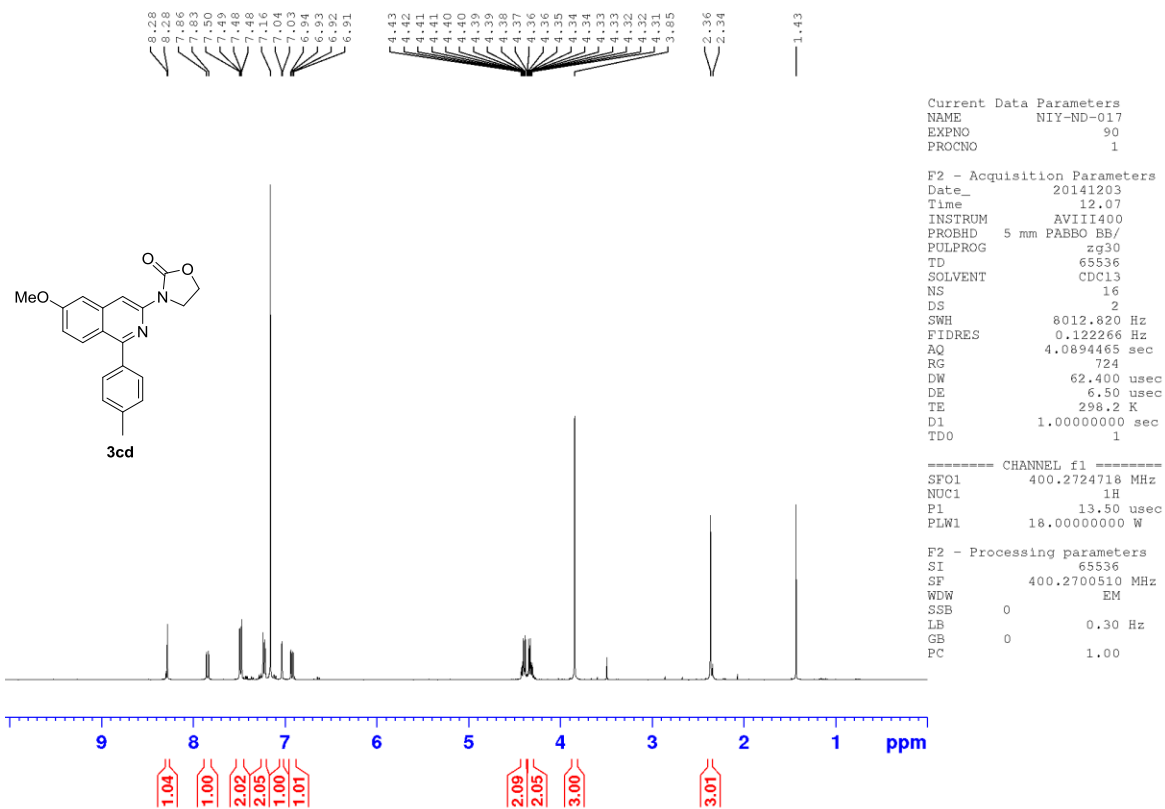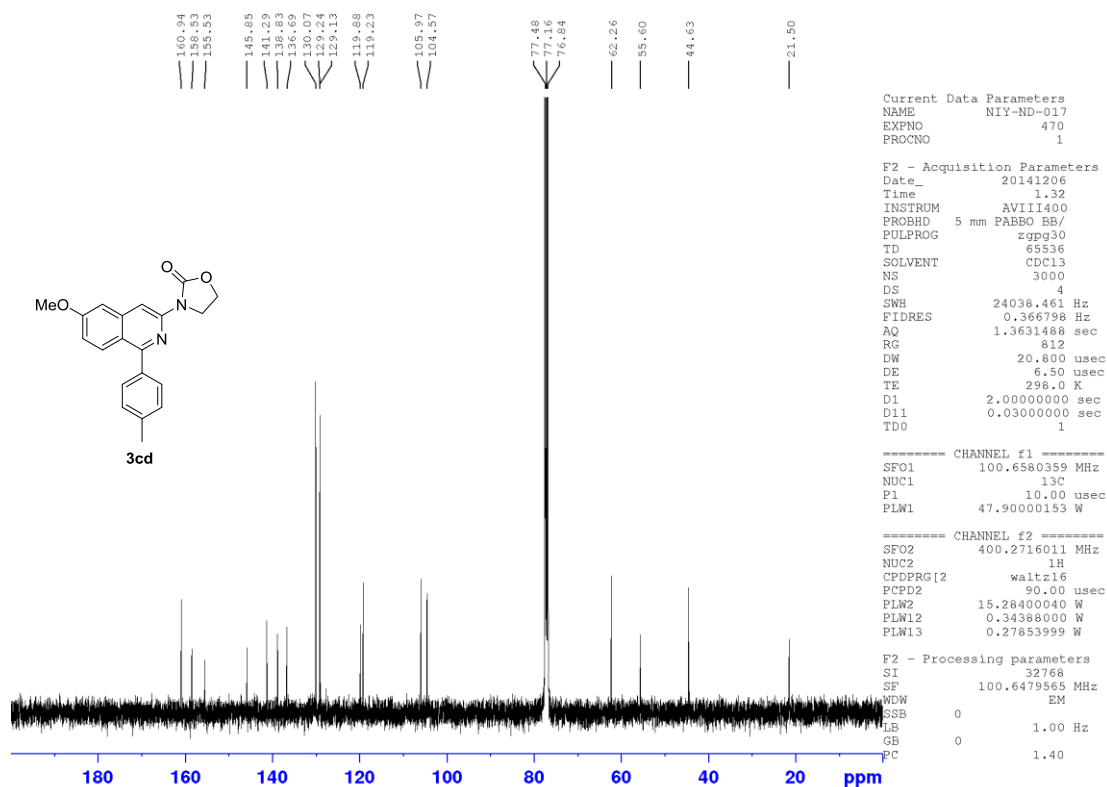

Supplementary Figure 27.  $^1\text{H}$  NMR and  $^{13}\text{C}$  NMR spectra of substrate **3cd**

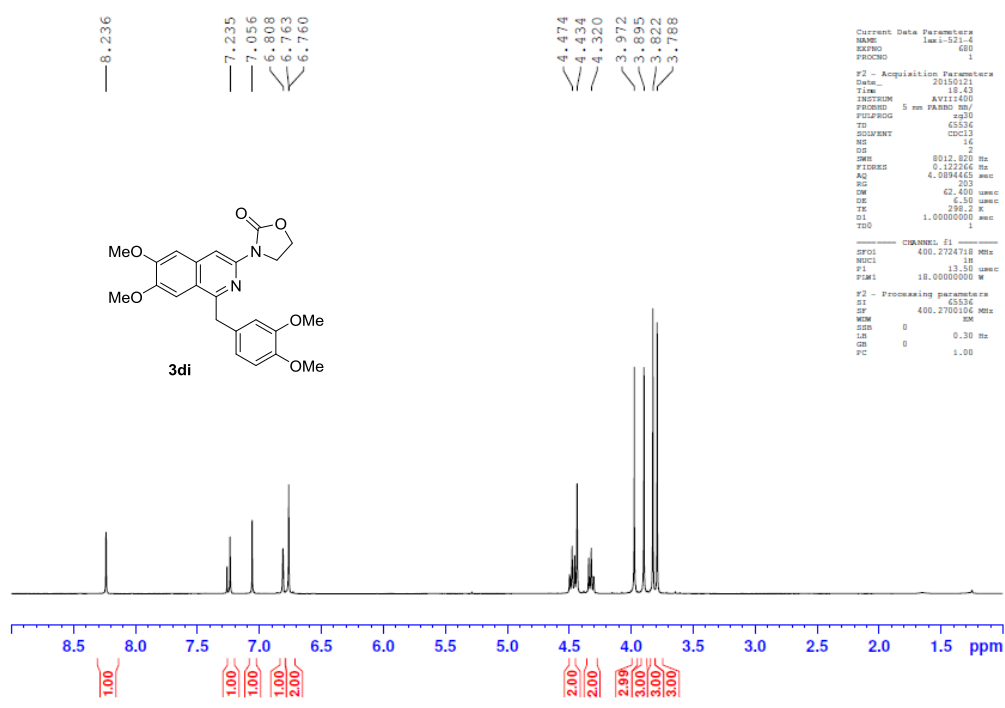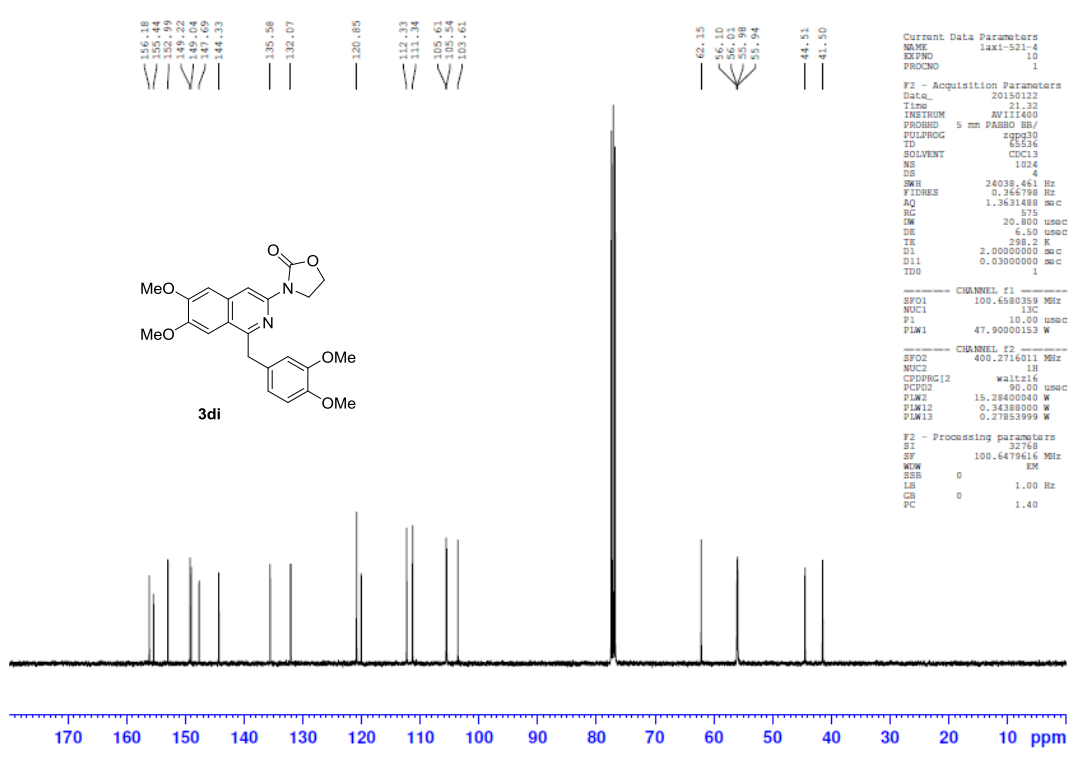

Supplementary Figure 28. <sup>1</sup>H NMR and <sup>13</sup>C NMR spectra of substrate **3di**

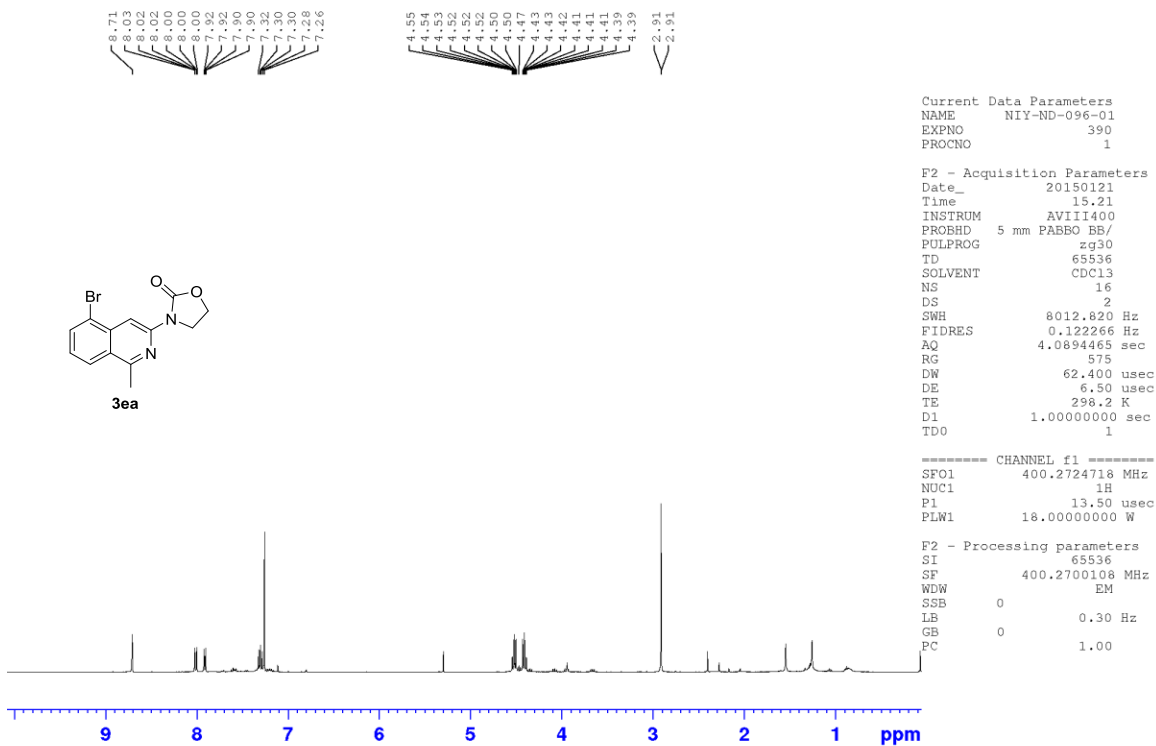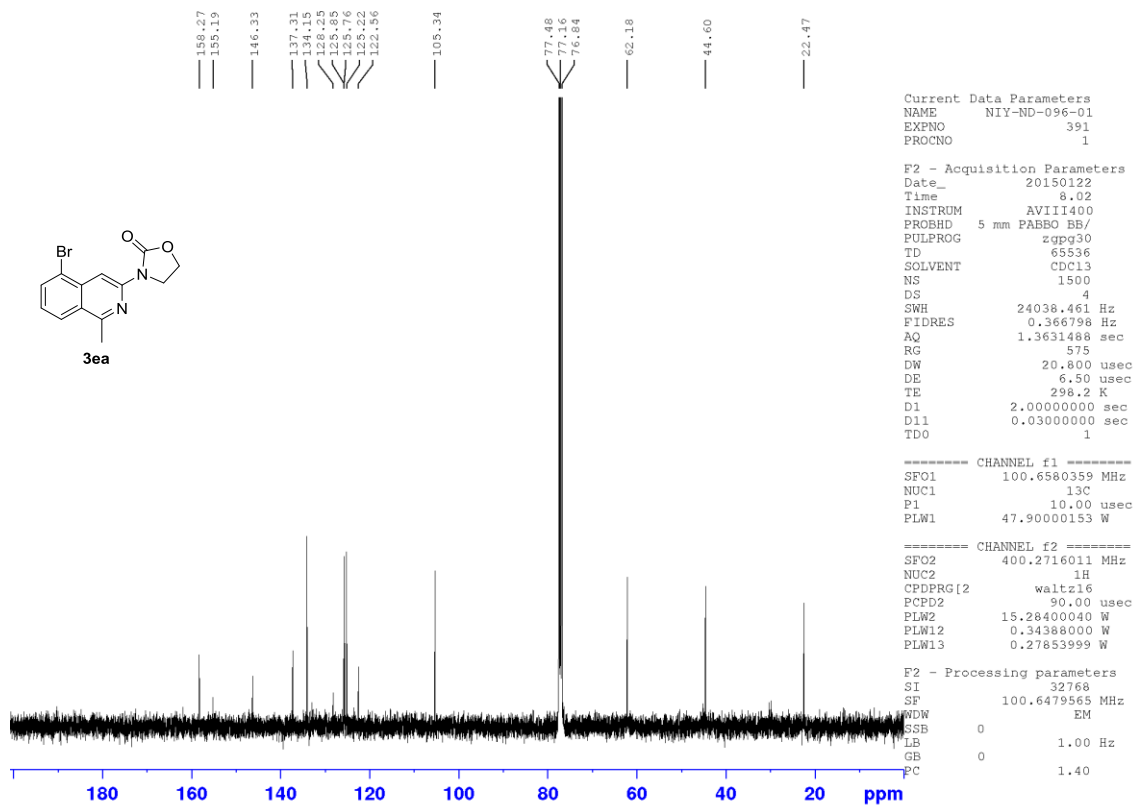

Supplementary Figure 29. <sup>1</sup>H NMR and <sup>13</sup>C NMR spectra of substrate **3ea**

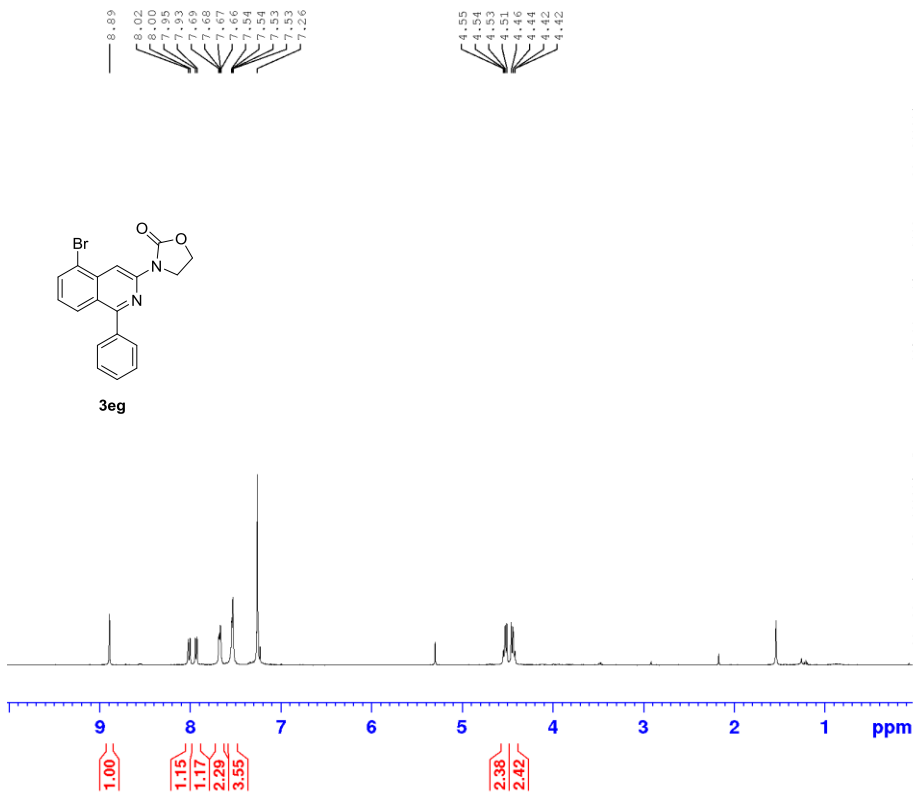

Current Data Parameters  
 NAME NIY-ND-103  
 EXPNO 391  
 PROCNO 1

F2 - Acquisition Parameters  
 Date\_ 20150210  
 Time 18.09  
 INSTRUM AVIII400  
 PROBHD 5 mm PABBO BB/  
 PULPROG zg30  
 TD 65536  
 SOLVENT CDCl3  
 NS 16  
 DS 2  
 SWH 8012.820 Hz  
 FIDRES 0.122266 Hz  
 AQ 4.0894465 sec  
 RG 724  
 DW 62.400 usec  
 DE 6.50 usec  
 TE 298.2 K  
 D1 1.00000000 sec  
 TDO 1

===== CHANNEL f1 =====  
 SFO1 400.2724718 MHz  
 NUC1 1H  
 P1 13.50 usec  
 PLW1 18.00000000 W

F2 - Processing parameters  
 SI 65536  
 SF 400.2700098 MHz  
 WDW EM  
 SSB 0  
 LB 0.30 Hz  
 GB 0  
 PC 1.00

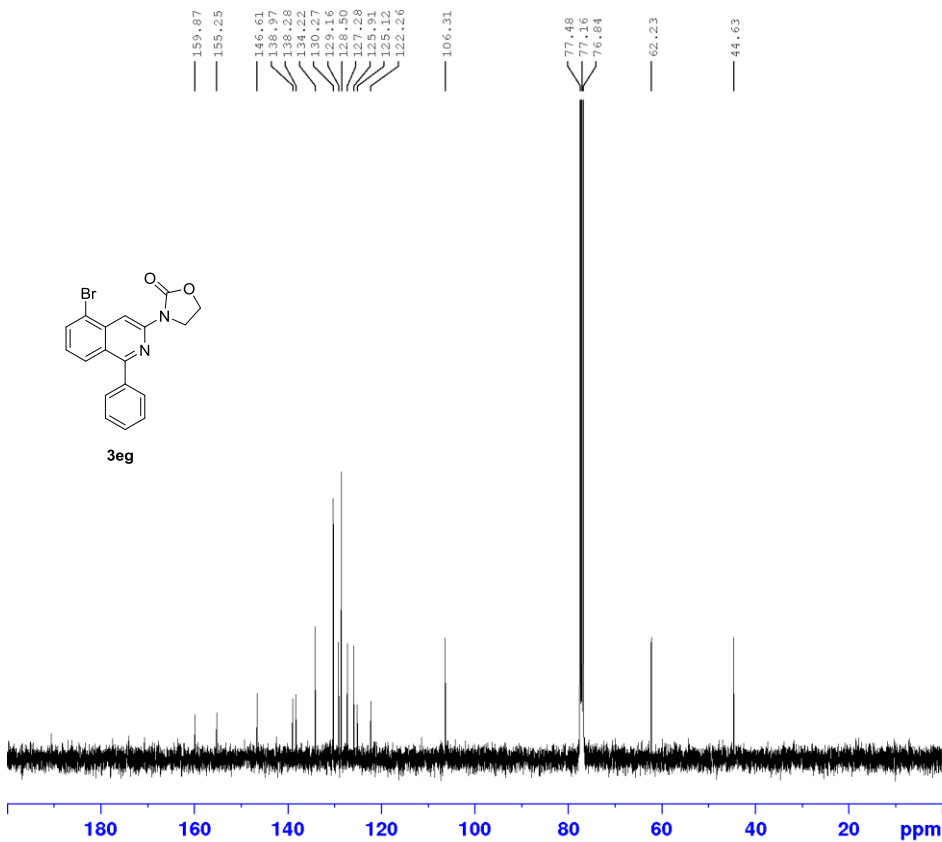

Current Data Parameters  
 NAME NIY-ND-103  
 EXPNO 442  
 PROCNO 1

F2 - Acquisition Parameters  
 Date\_ 20150211  
 Time 3.17  
 INSTRUM AVIII400  
 PROBHD 5 mm PABBO BB/  
 PULPROG zgpg30  
 TD 65536  
 SOLVENT CDCl3  
 NS 1500  
 DS 4  
 SWH 24038.461 Hz  
 FIDRES 0.366798 Hz  
 AQ 1.3631488 sec  
 RG 724  
 DW 20.800 usec  
 DE 6.50 usec  
 TE 298.2 K  
 D1 2.00000000 sec  
 D11 0.03000000 sec  
 TDO 1

===== CHANNEL f1 =====  
 SFO1 100.6580359 MHz  
 NUC1 13C  
 P1 10.00 usec  
 PLW1 47.90000153 W

===== CHANNEL f2 =====  
 SFO2 400.2716011 MHz  
 NUC2 1H  
 CPDPRG[2] waltz16  
 PCPD2 90.00 usec  
 PLW2 15.28400040 W  
 PLW12 0.34388000 W  
 PLW13 0.27853999 W

F2 - Processing parameters  
 SI 32768  
 SF 100.6479564 MHz  
 WDW EM  
 SSB 0  
 LB 1.00 Hz  
 GB 0  
 PC 1.40

Supplementary Figure 30. <sup>1</sup>H NMR and <sup>13</sup>C NMR spectra of substrate **3eg**

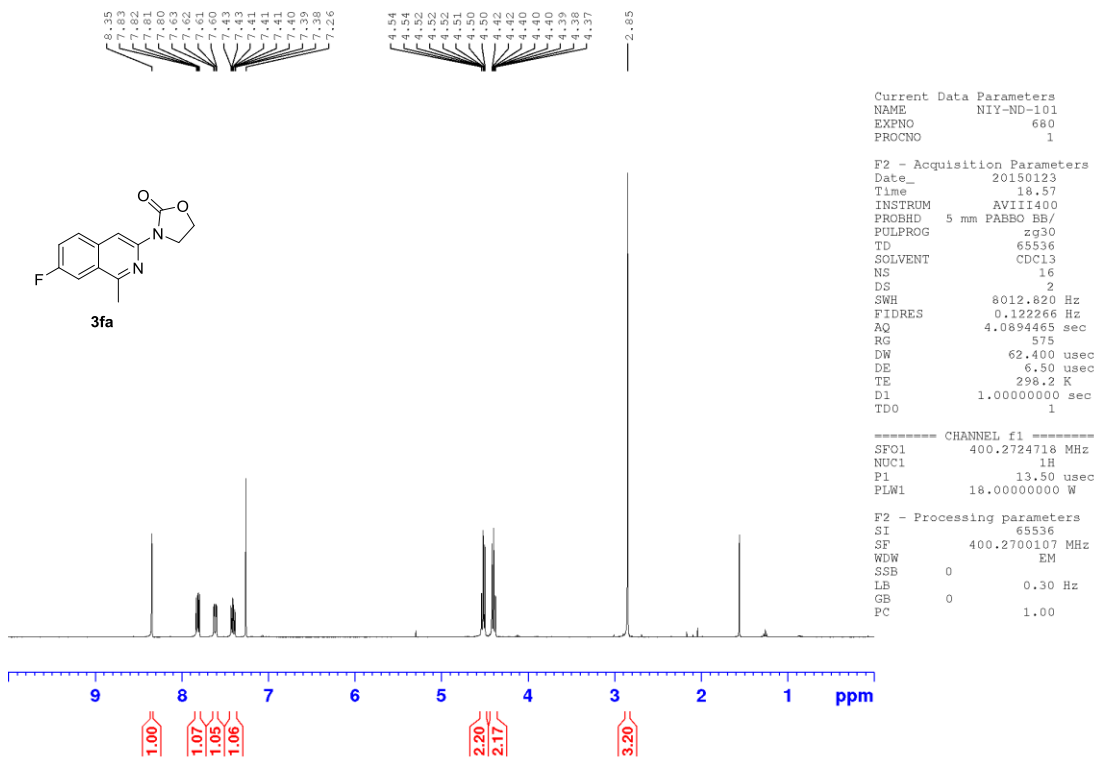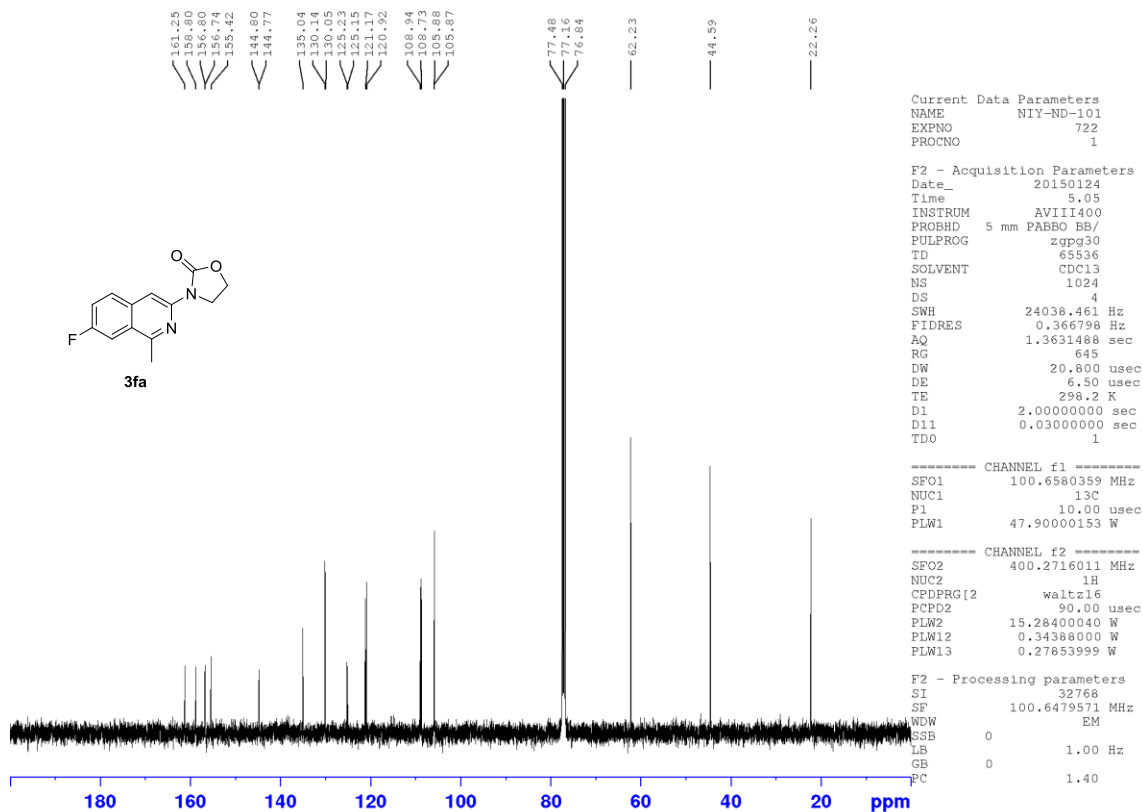

Supplementary Figure 31. <sup>1</sup>H NMR and <sup>13</sup>C NMR spectra of substrate **3fa**

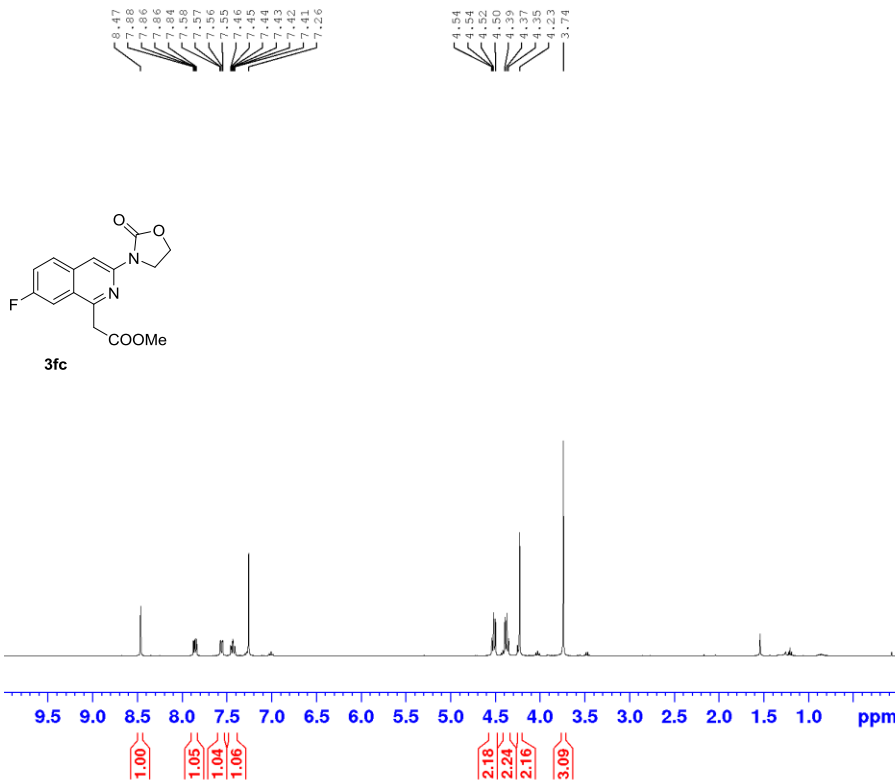

Current Data Parameters  
 NAME NIY-ND-102  
 EXPNO 510  
 PROCNO 1

F2 - Acquisition Parameters  
 Date\_ 20150205  
 Time 18.31  
 INSTRUM AVIII400  
 PROBHD 5 mm PABBO BB/  
 PULPROG zg30  
 TD 65536  
 SOLVENT CDCl3  
 NS 16  
 DS 2  
 SWH 8012.820 Hz  
 FIDRES 0.122266 Hz  
 AQ 4.0894465 sec  
 RG 645  
 DW 62.400 usec  
 DE 6.50 usec  
 TE 298.2 K  
 D1 1.00000000 sec  
 TDO 1

===== CHANNEL f1 =====  
 SFO1 400.2724718 MHz  
 NUC1 1H  
 P1 13.50 usec  
 PLW1 18.00000000 W

F2 - Processing parameters  
 SI 65536  
 SF 400.2700098 MHz  
 WDW EM  
 SSB 0  
 LB 0.30 Hz  
 GB 0  
 PC 1.00

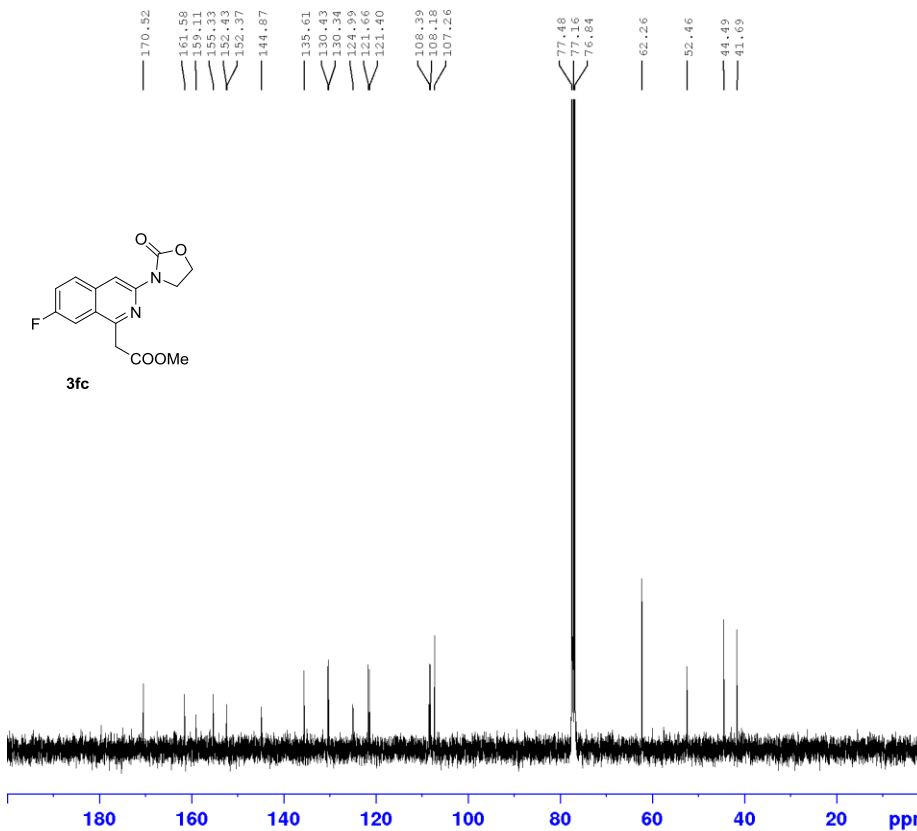

Current Data Parameters  
 NAME NIY-ND-102  
 EXPNO 70  
 PROCNO 1

F2 - Acquisition Parameters  
 Date\_ 20150207  
 Time 0.38  
 INSTRUM AVIII400  
 PROBHD 5 mm PABBO BB/  
 PULPROG zgpg30  
 TD 65536  
 SOLVENT CDCl3  
 NS 1024  
 DS 4  
 SWH 24038.461 Hz  
 FIDRES 0.366798 Hz  
 AQ 1.3631488 sec  
 RG 812  
 DW 20.800 usec  
 DE 6.50 usec  
 TE 298.2 K  
 D1 2.00000000 sec  
 D11 0.03000000 sec  
 TDO 1

===== CHANNEL f1 =====  
 SFO1 100.6580359 MHz  
 NUC1 13C  
 P1 10.00 usec  
 PLW1 47.90000153 W

===== CHANNEL f2 =====  
 SFO2 400.2716011 MHz  
 NUC2 1H  
 CPDPRG12 waltz16  
 PCPD2 90.00 usec  
 PLW2 15.28400040 W  
 PLW12 0.34388000 W  
 PLW13 0.27853999 W

F2 - Processing parameters  
 SI 32768  
 SF 100.6479565 MHz  
 WDW EM  
 SSB 0  
 LB 1.00 Hz  
 GB 0  
 PC 1.40

Supplementary Figure 32. <sup>1</sup>H NMR and <sup>13</sup>C NMR spectra of substrate **3fc**



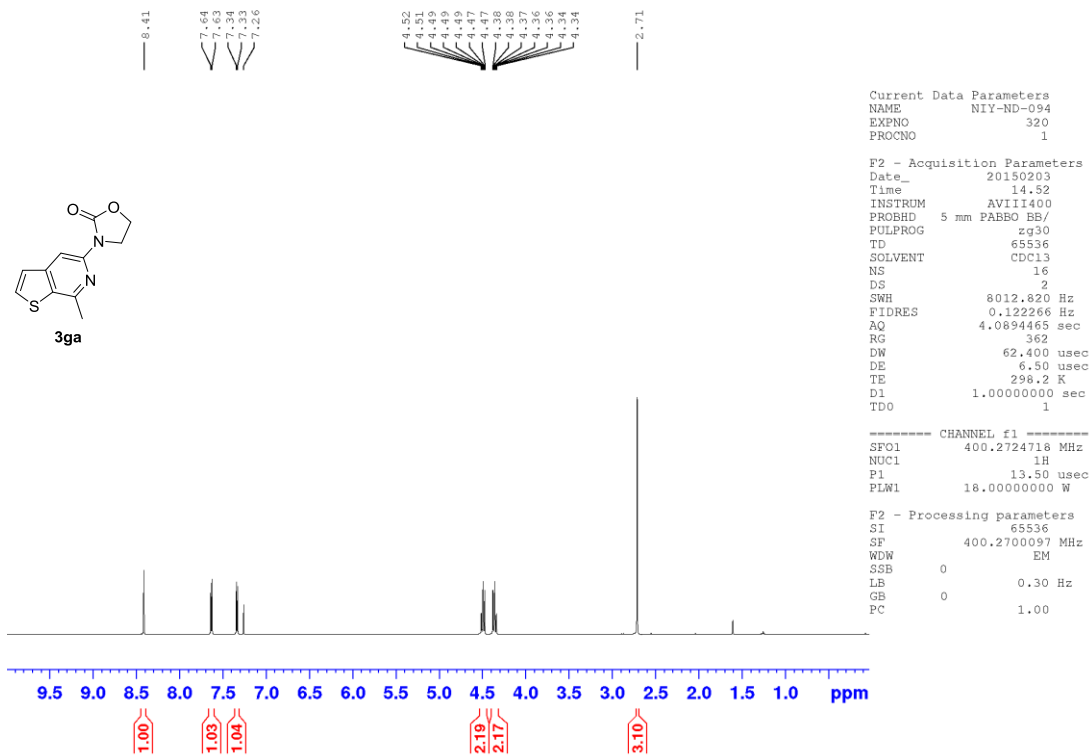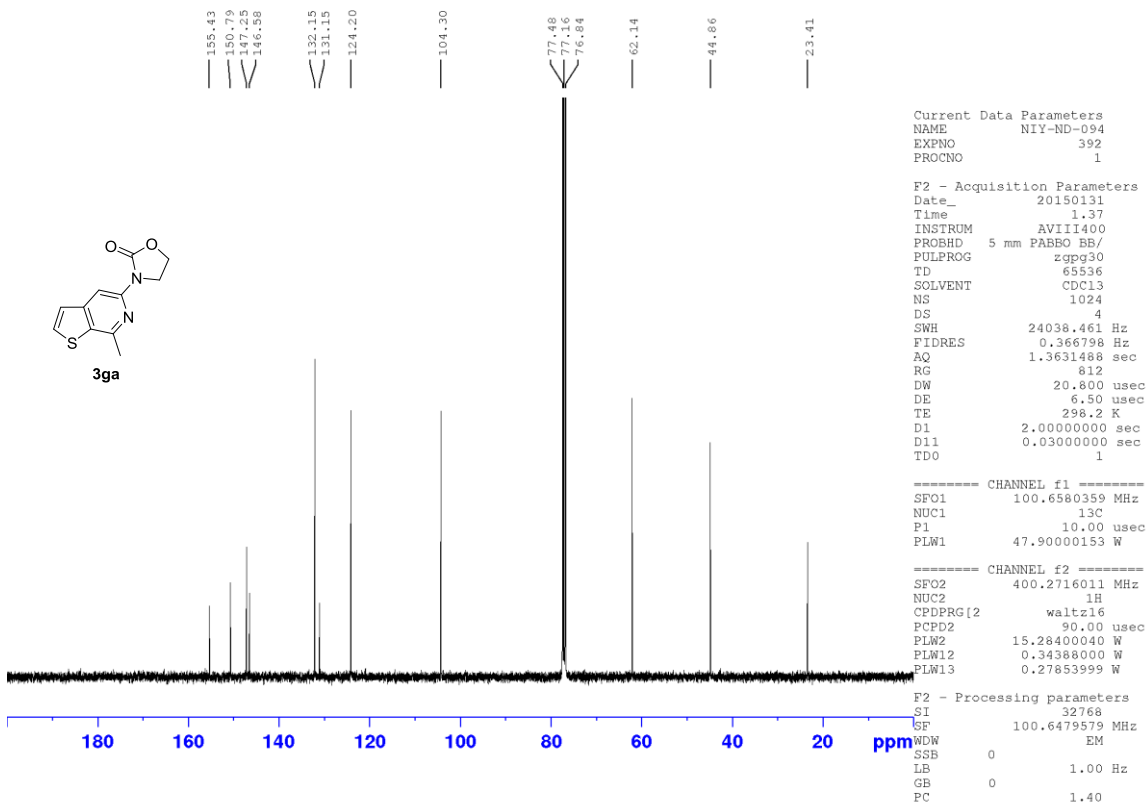

Supplementary Figure 33. <sup>1</sup>H NMR and <sup>13</sup>C NMR spectra of substrate **3ga**

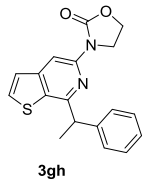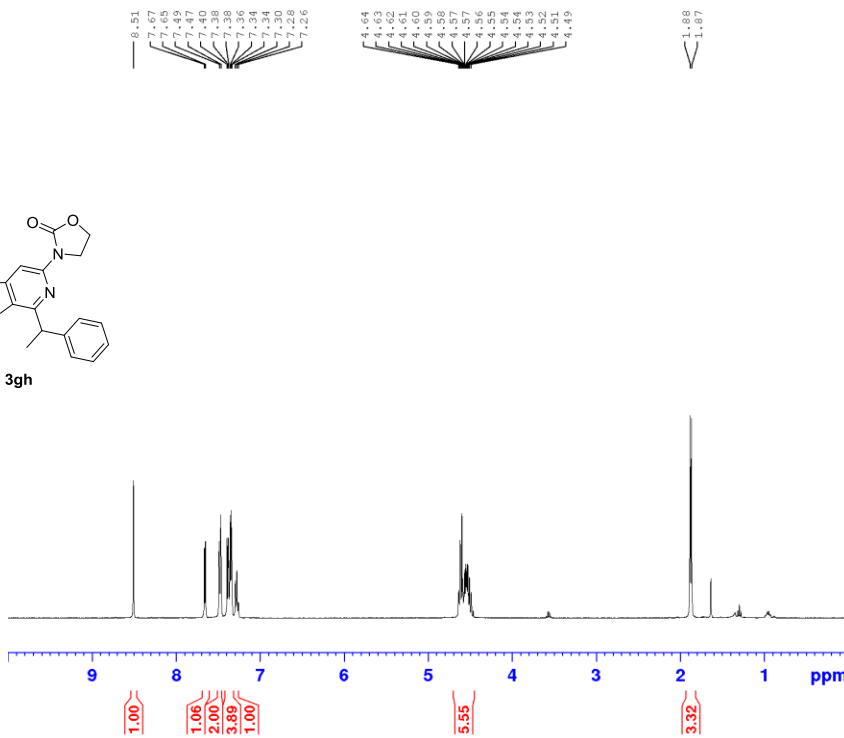

Current Data Parameters  
 NAME NIY-ND-095  
 EXPNO 20  
 PROCNO 1

F2 - Acquisition Parameters  
 Date\_ 20150201  
 Time 18.50  
 INSTRUM AVIII400  
 PROBHD 5 mm PABBO BB/  
 PULPROG zg30  
 TD 65536  
 SOLVENT CDCl3  
 NS 16  
 DS 2  
 SWH 8012.820 Hz  
 FIDRES 0.122266 Hz  
 AQ 4.0894465 sec  
 RG 456  
 DW 62.400 usec  
 DE 6.50 usec  
 TE 298.2 K  
 D1 1.00000000 sec  
 TDO 1

----- CHANNEL f1 -----  
 SFO1 400.2724718 MHz  
 NUC1 1H  
 P1 13.50 usec  
 PLW1 18.00000000 W

F2 - Processing parameters  
 SI 65536  
 SF 400.2699761 MHz  
 WDW EM  
 SSB 0  
 LB 0.30 Hz  
 GB 0  
 PC 1.00

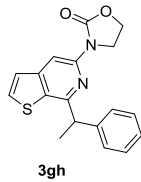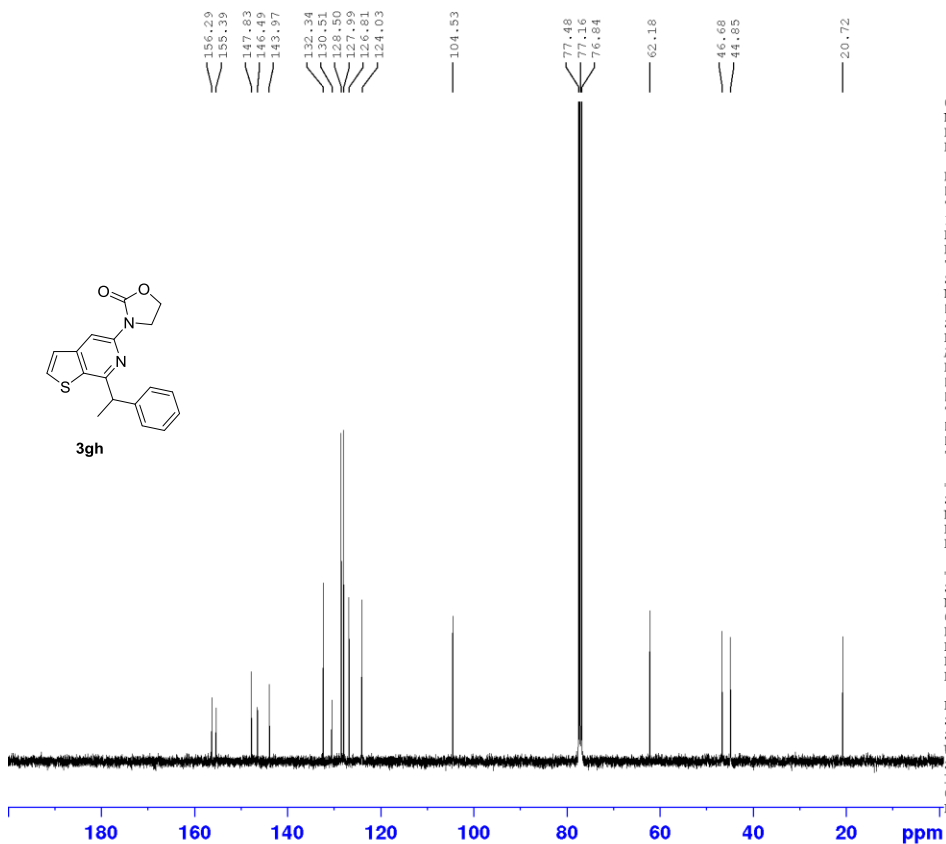

Current Data Parameters  
 NAME NIY-ND-095  
 EXPNO 22  
 PROCNO 1

F2 - Acquisition Parameters  
 Date\_ 20150201  
 Time 21.31  
 INSTRUM AVIII400  
 PROBHD 5 mm PABBO BB/  
 PULPROG zgpg30  
 TD 65536  
 SOLVENT CDCl3  
 NS 1024  
 DS 4  
 SWH 24038.461 Hz  
 FIDRES 0.366798 Hz  
 AQ 1.3631488 sec  
 RG 724  
 DW 20.800 usec  
 DE 6.50 usec  
 TE 298.2 K  
 D1 2.00000000 sec  
 D11 0.03000000 sec  
 TDO 1

----- CHANNEL f1 -----  
 SFO1 100.6580359 MHz  
 NUC1 13C  
 P1 10.00 usec  
 PLW1 47.90000153 W

----- CHANNEL f2 -----  
 SFO2 400.2716011 MHz  
 NUC2 1H  
 CPDPRG2 waltz16  
 PCPD2 90.00 usec  
 PLW2 15.28400040 W  
 PLW12 0.34388000 W  
 PLW13 0.27853999 W

F2 - Processing parameters  
 SI 32768  
 SF 100.6479572 MHz  
 WDW EM  
 SSB 0  
 LB 1.00 Hz  
 GB 0  
 PC 1.40

Supplementary Figure 34. <sup>1</sup>H NMR and <sup>13</sup>C NMR spectra of substrate **3gh**

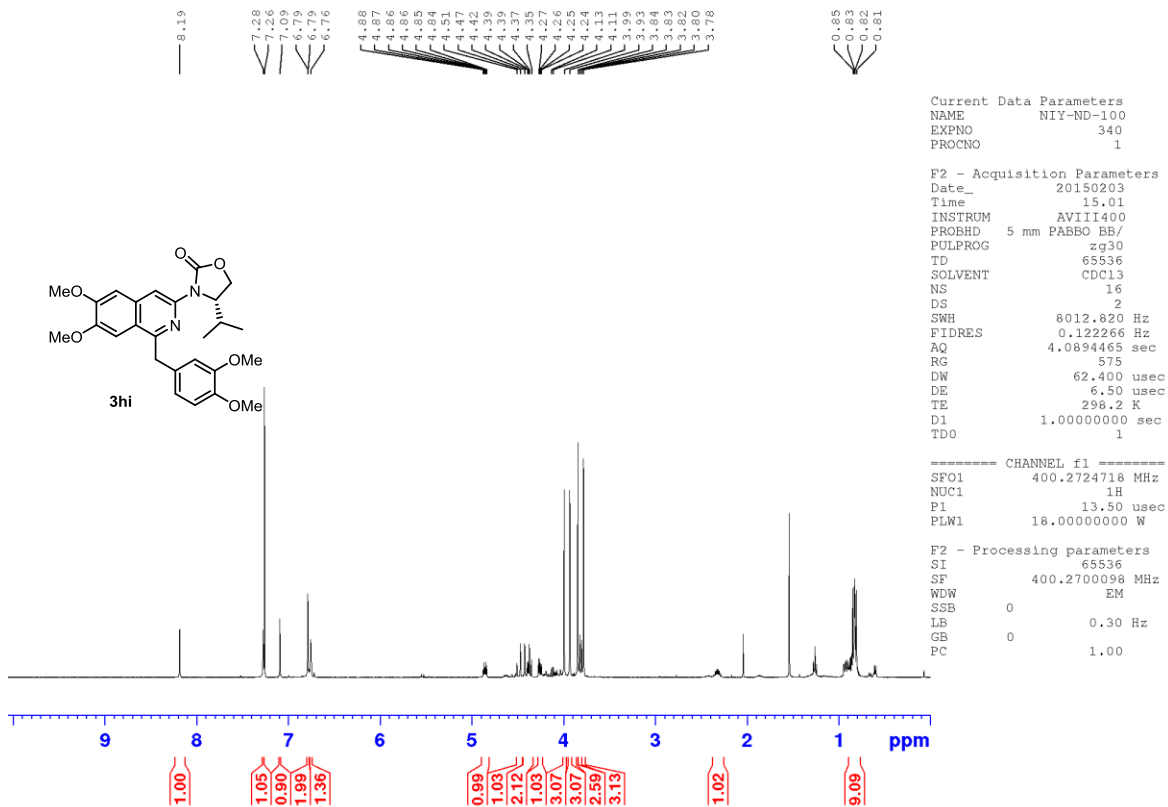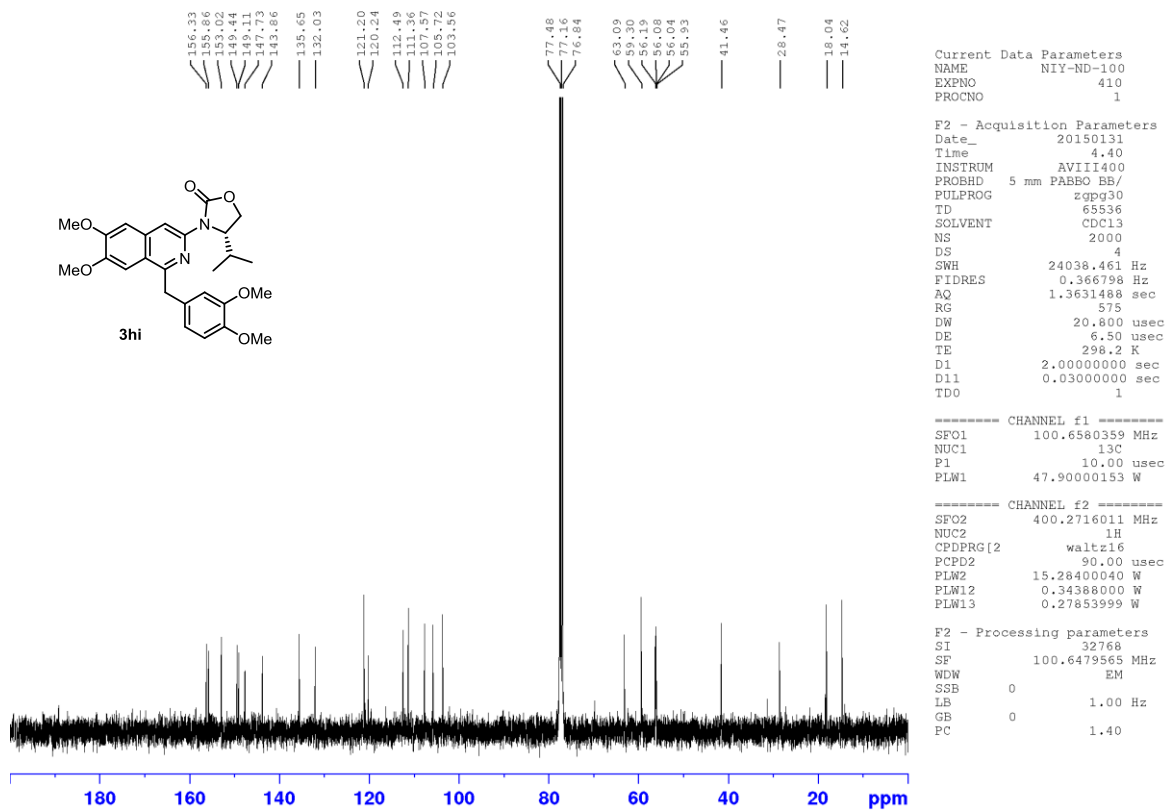

Supplementary Figure 35. <sup>1</sup>H NMR and <sup>13</sup>C NMR spectra of substrate **3hi**



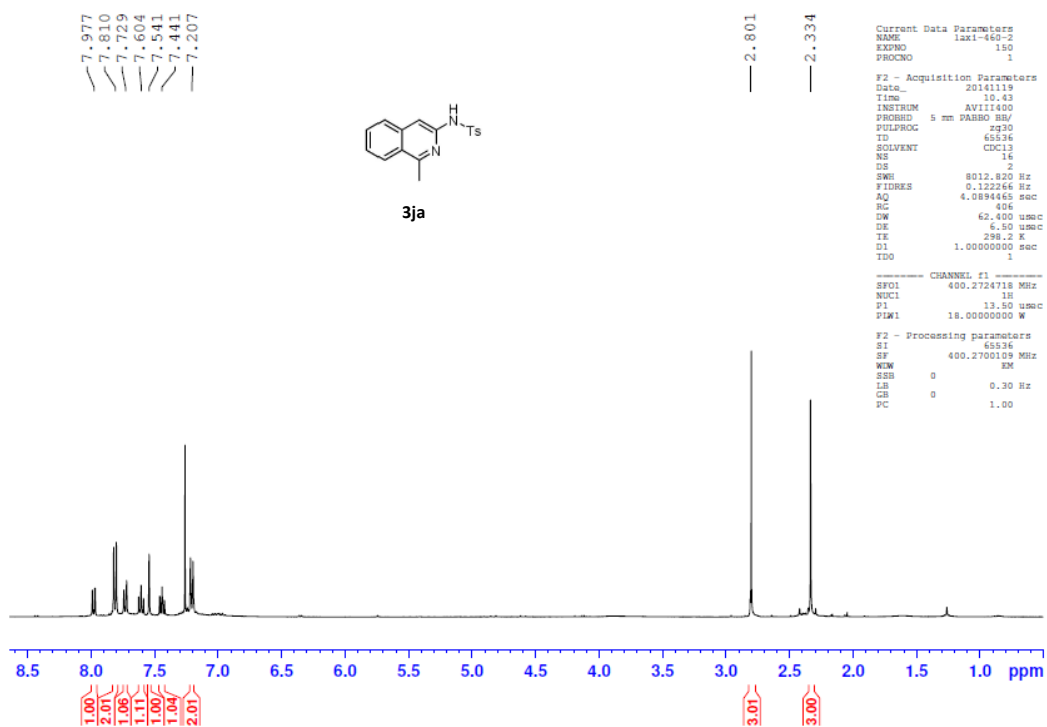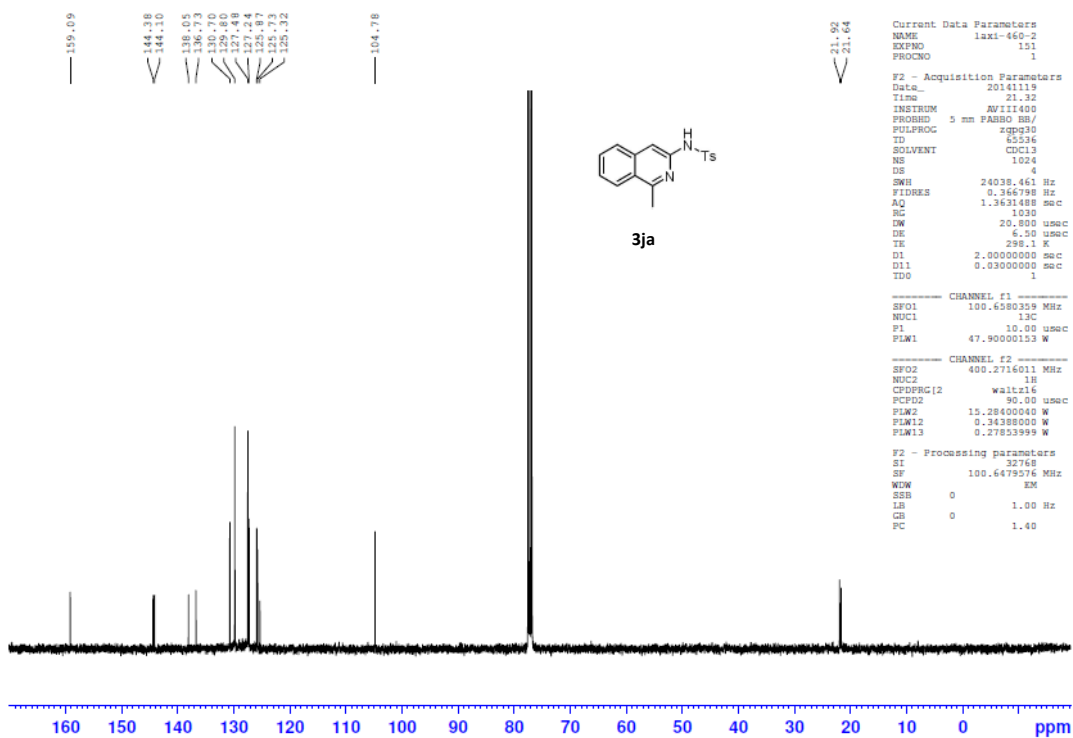

Supplementary Figure 37.  $^1\text{H}$  NMR and  $^{13}\text{C}$  NMR spectra of substrate **3ja**

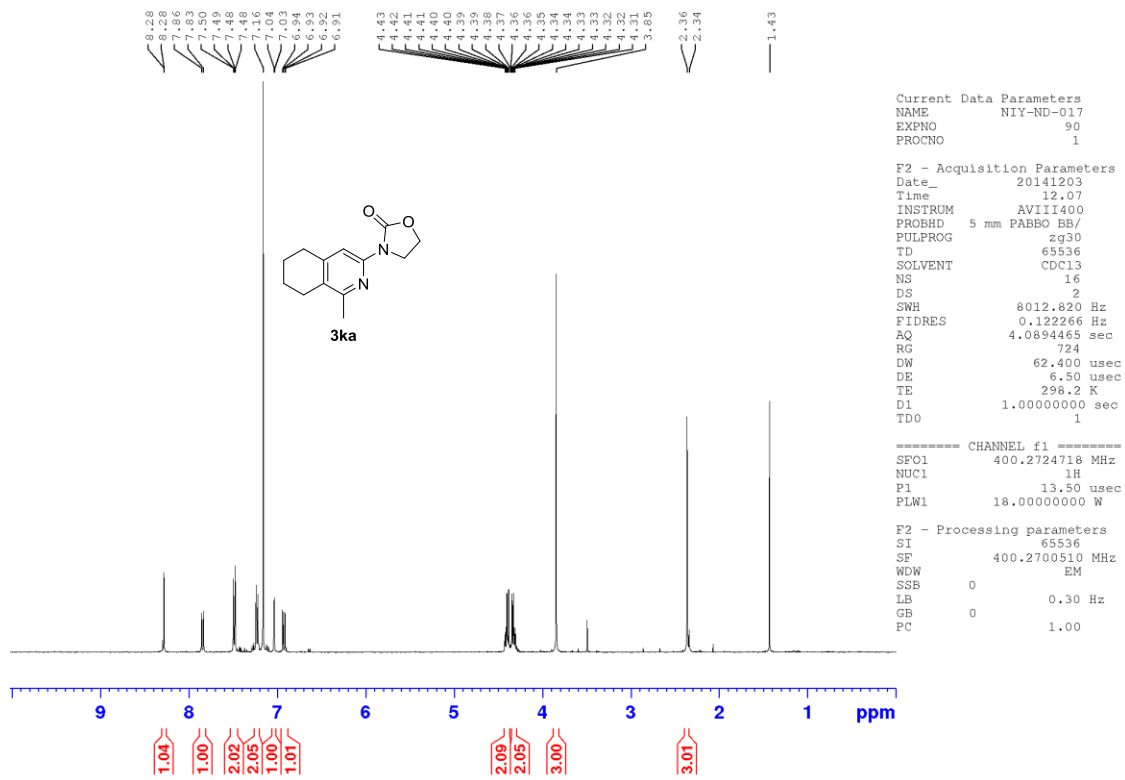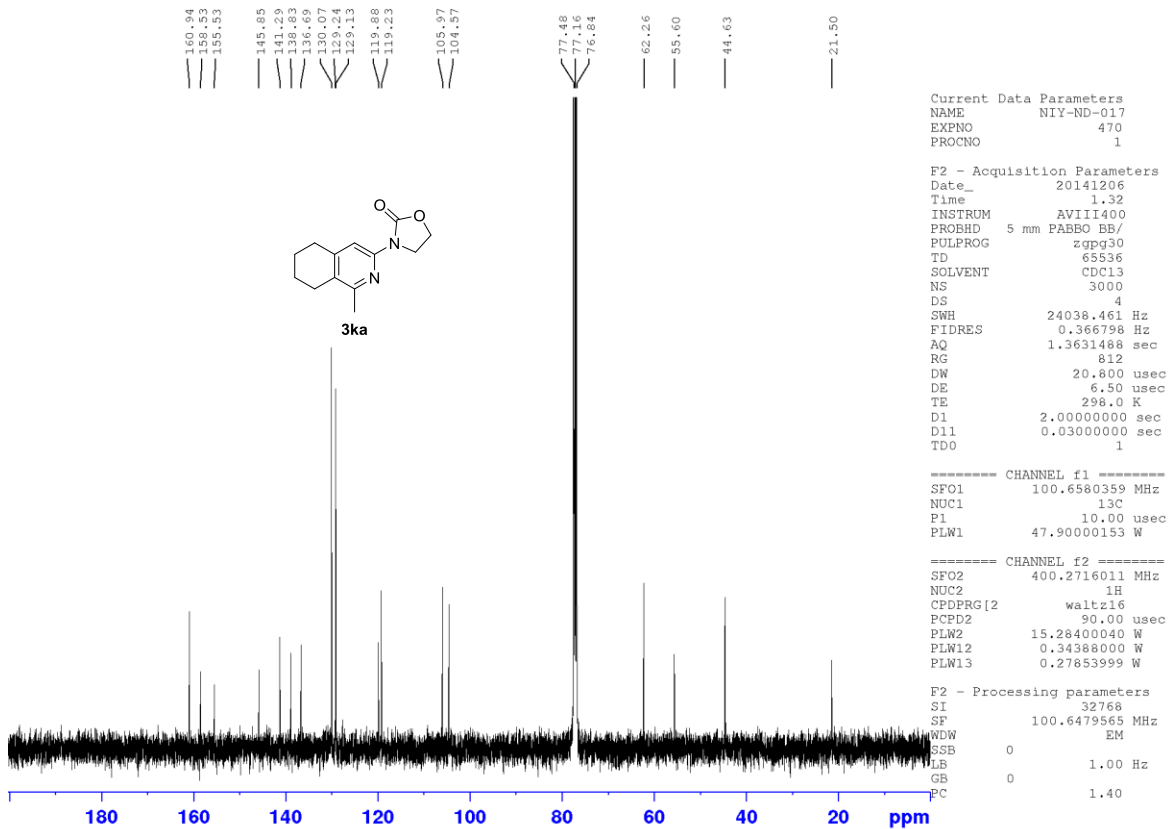

Supplementary Figure 38. <sup>1</sup>H NMR and <sup>13</sup>C NMR spectra of substrate **3ka**

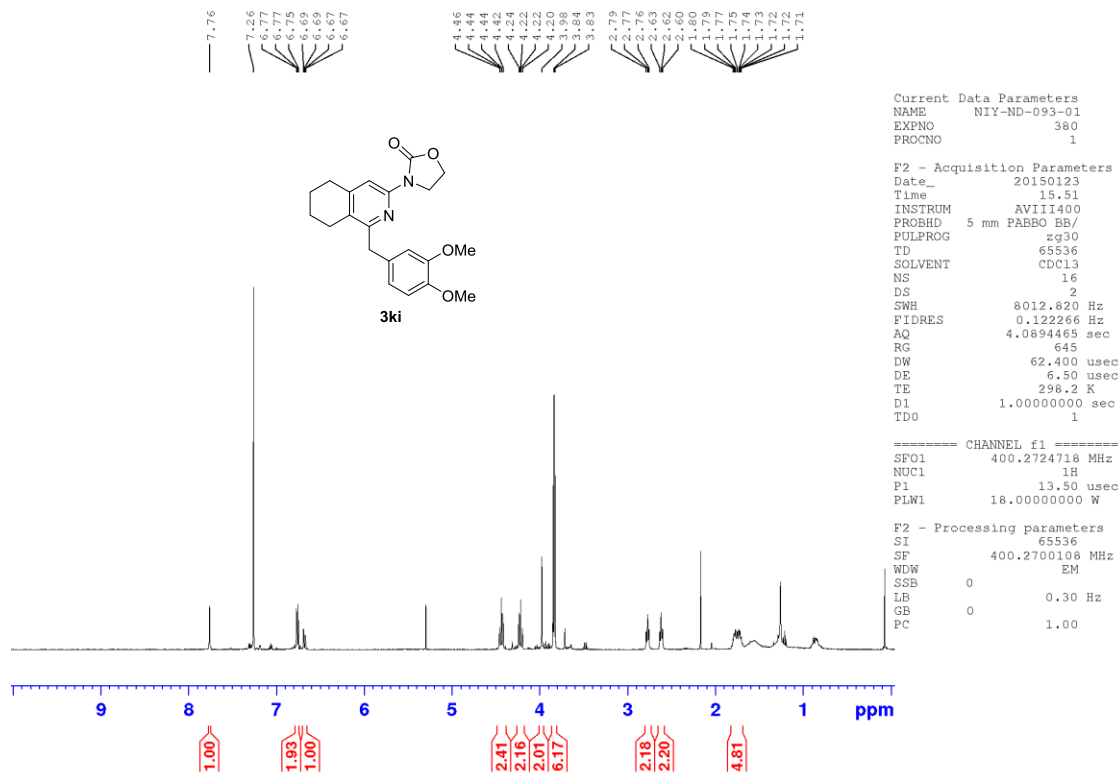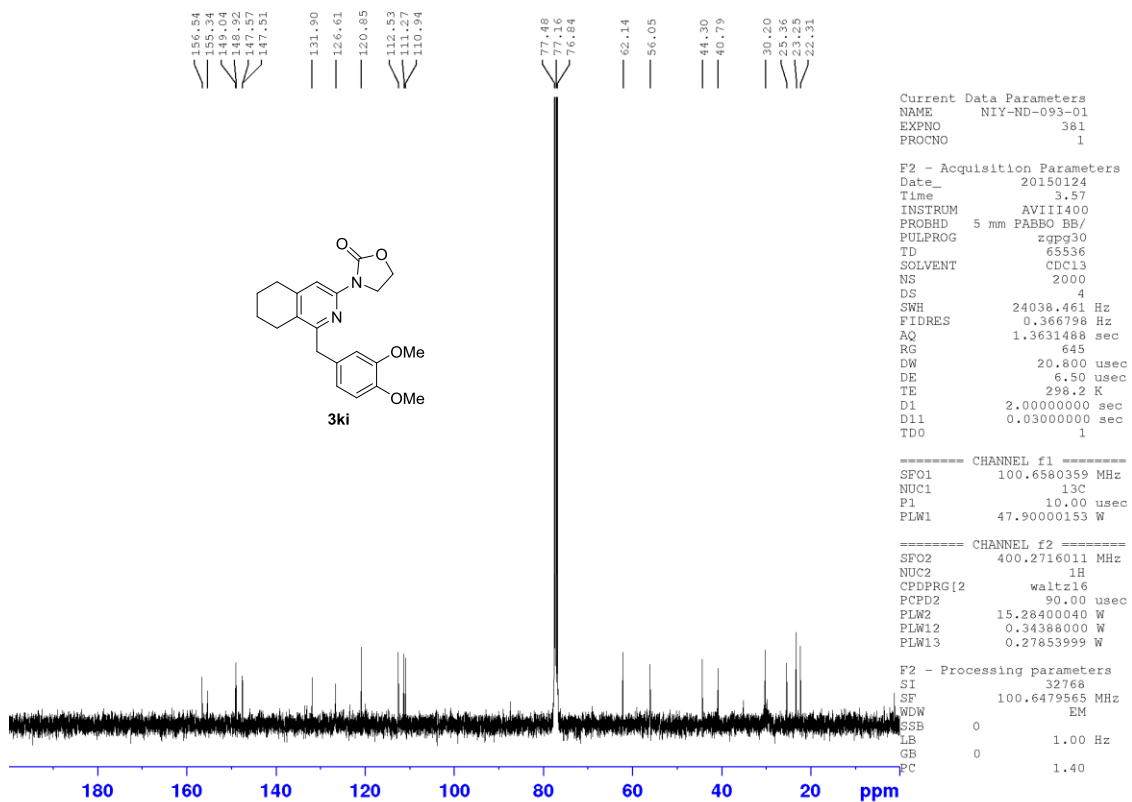

Supplementary Figure 39. <sup>1</sup>H NMR and <sup>13</sup>C NMR spectra of substrate **3ki**

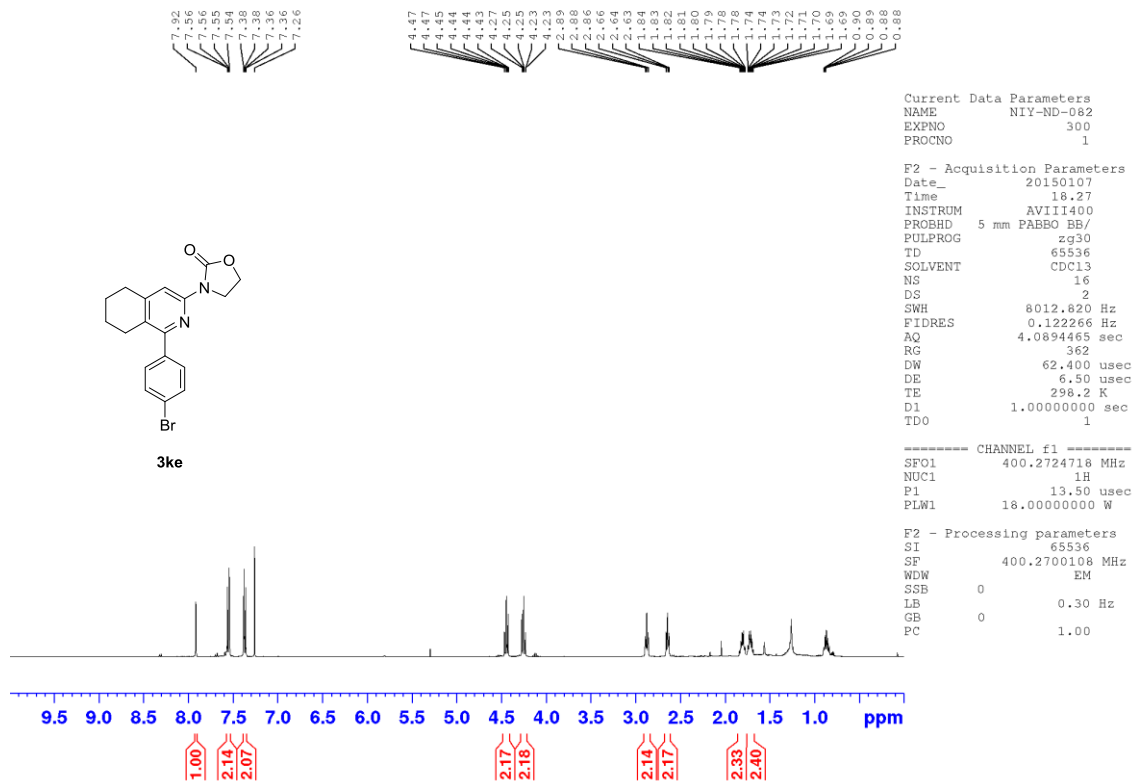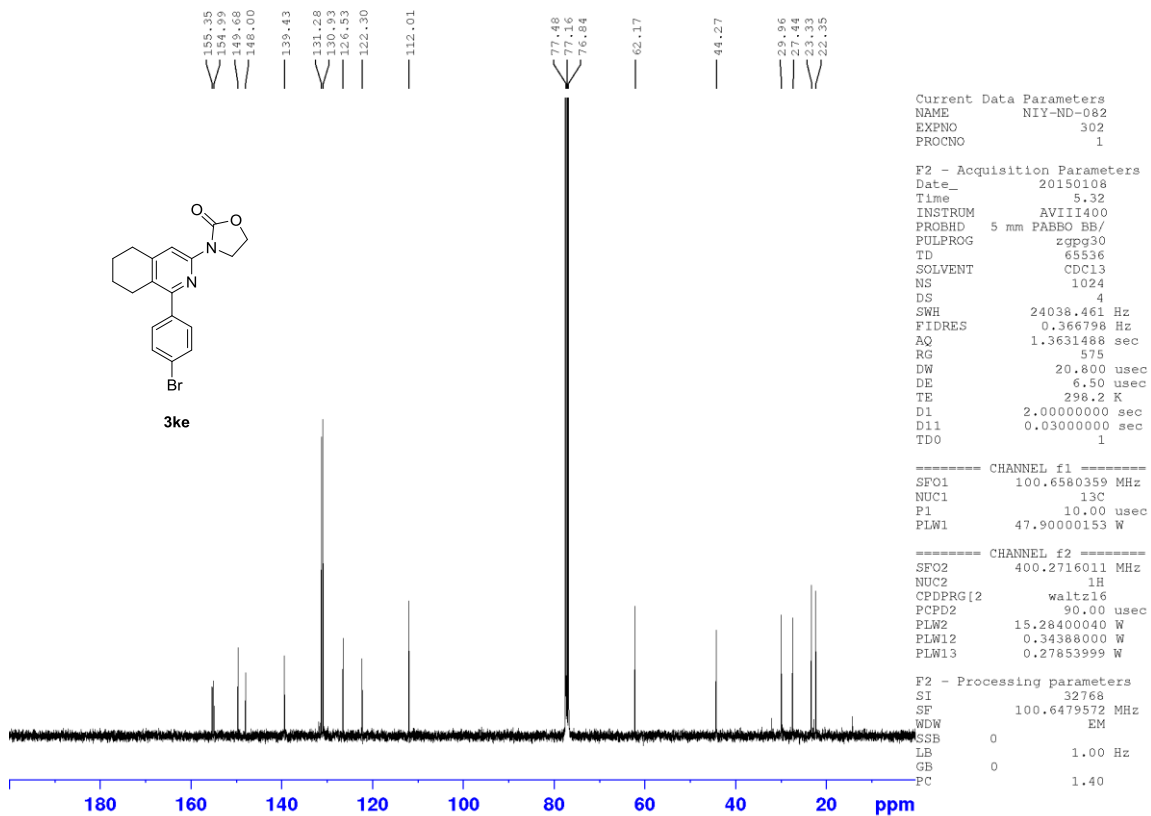

Supplementary Figure 40. <sup>1</sup>H NMR and <sup>13</sup>C NMR spectra of substrate 3ke



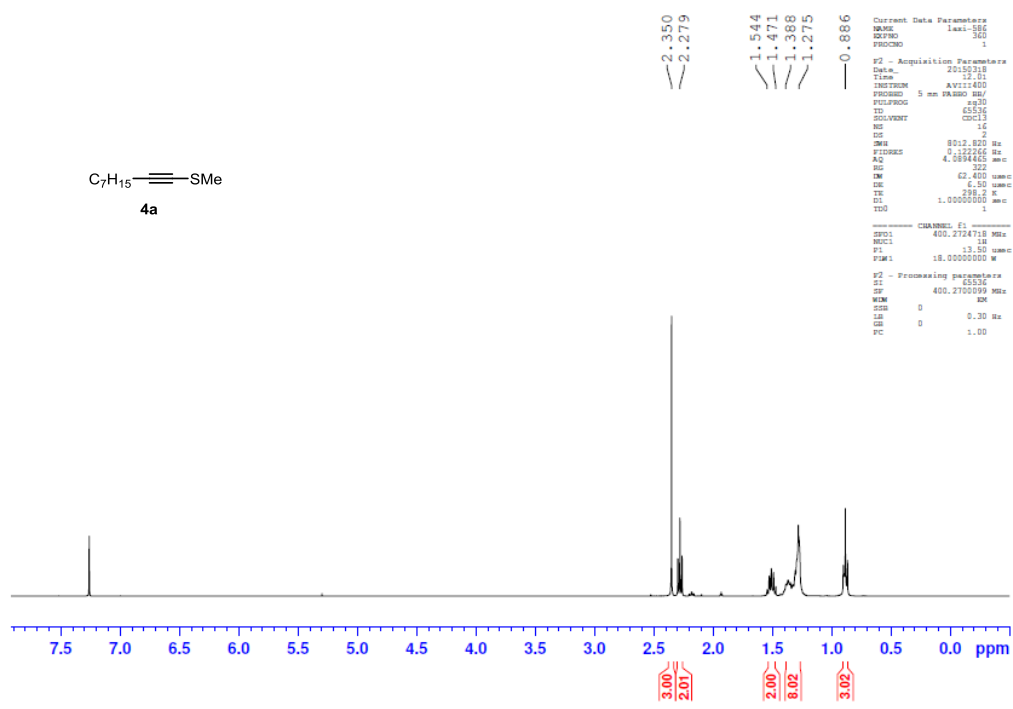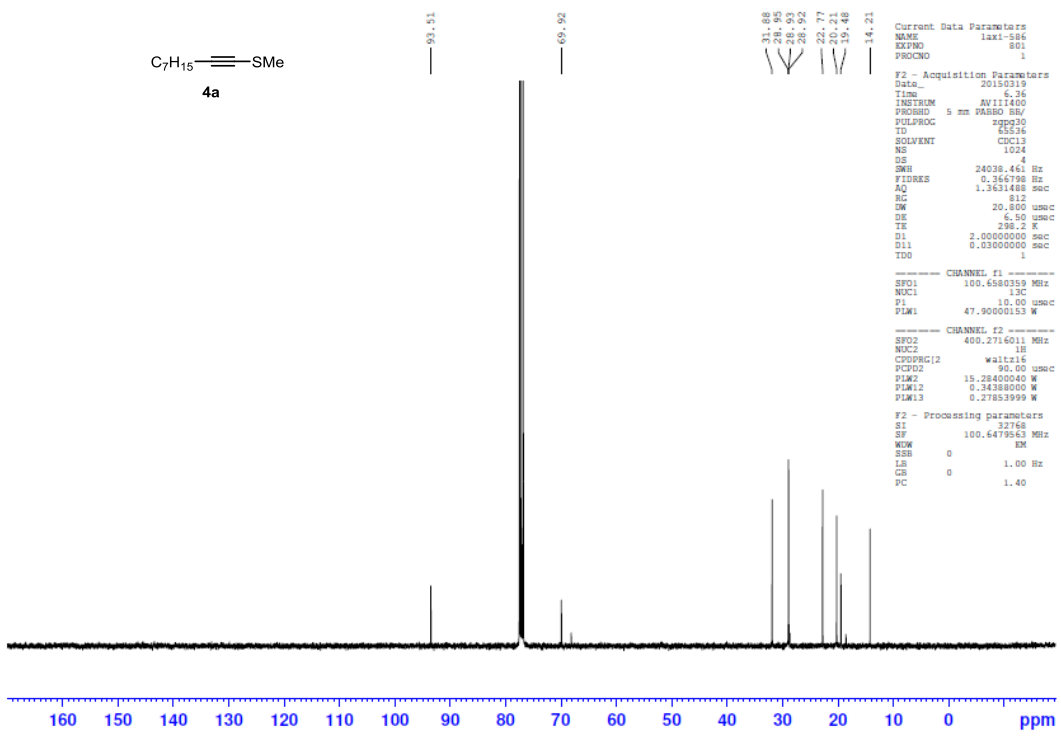

Supplementary Figure 41. <sup>1</sup>H NMR and <sup>13</sup>C NMR spectra of substrate **4a**

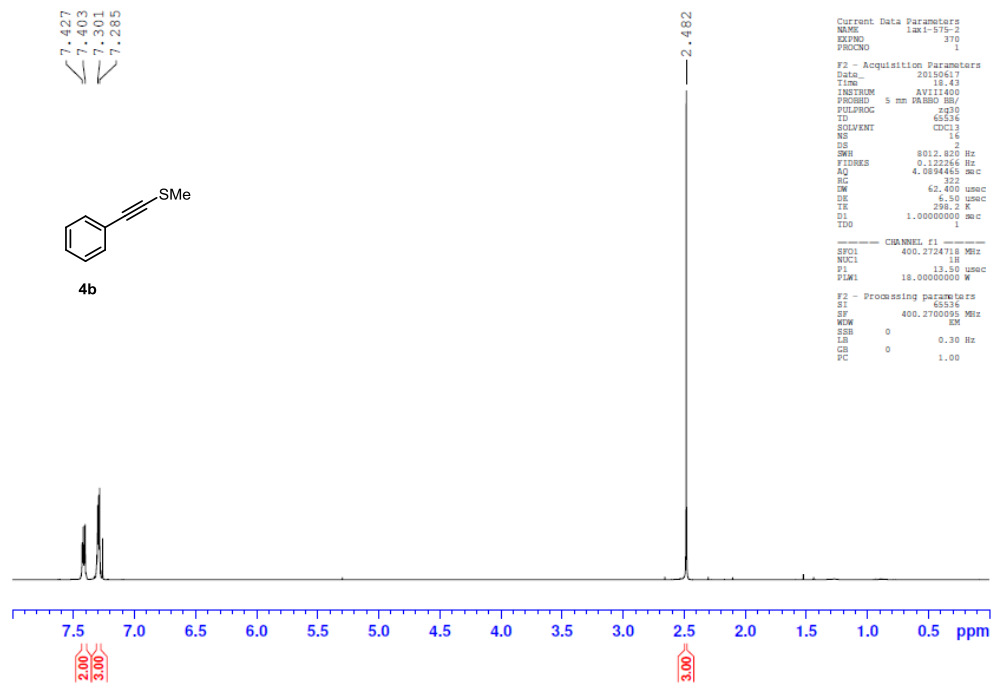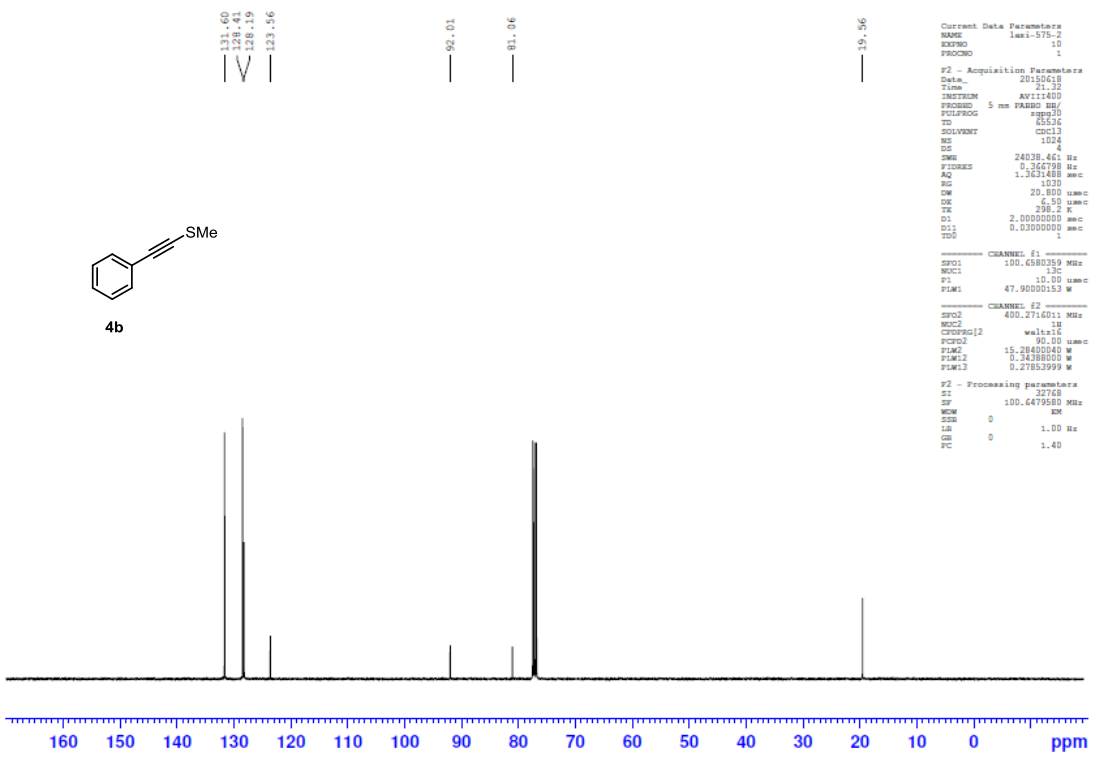

Supplementary Figure 42. <sup>1</sup>H NMR and <sup>13</sup>C NMR spectra of substrate **4b**

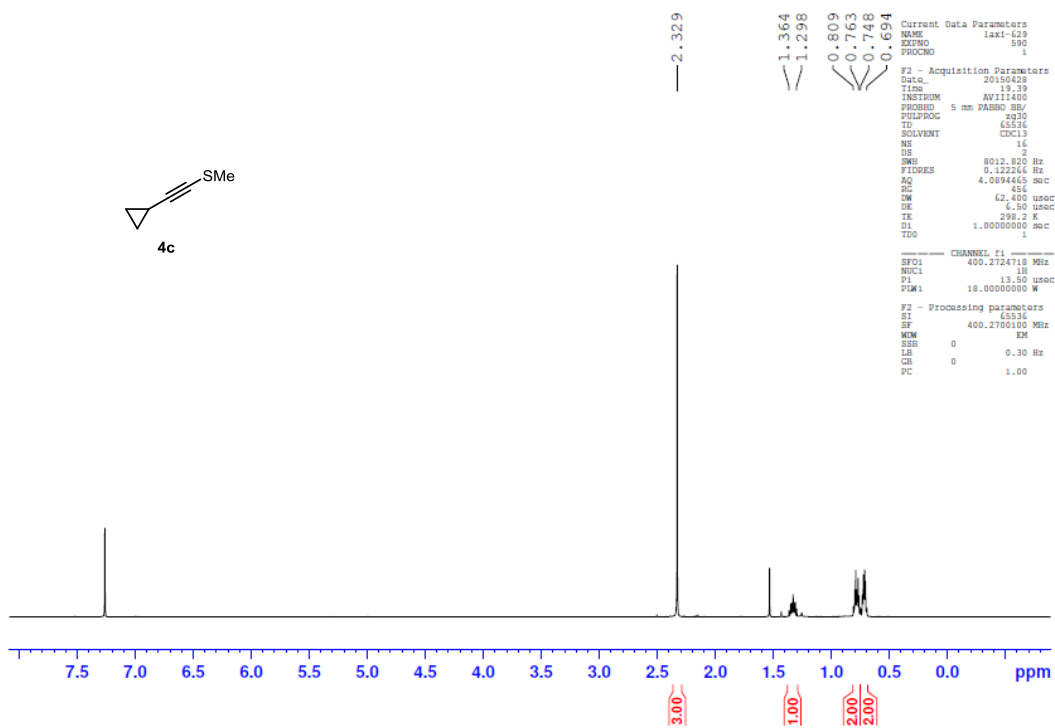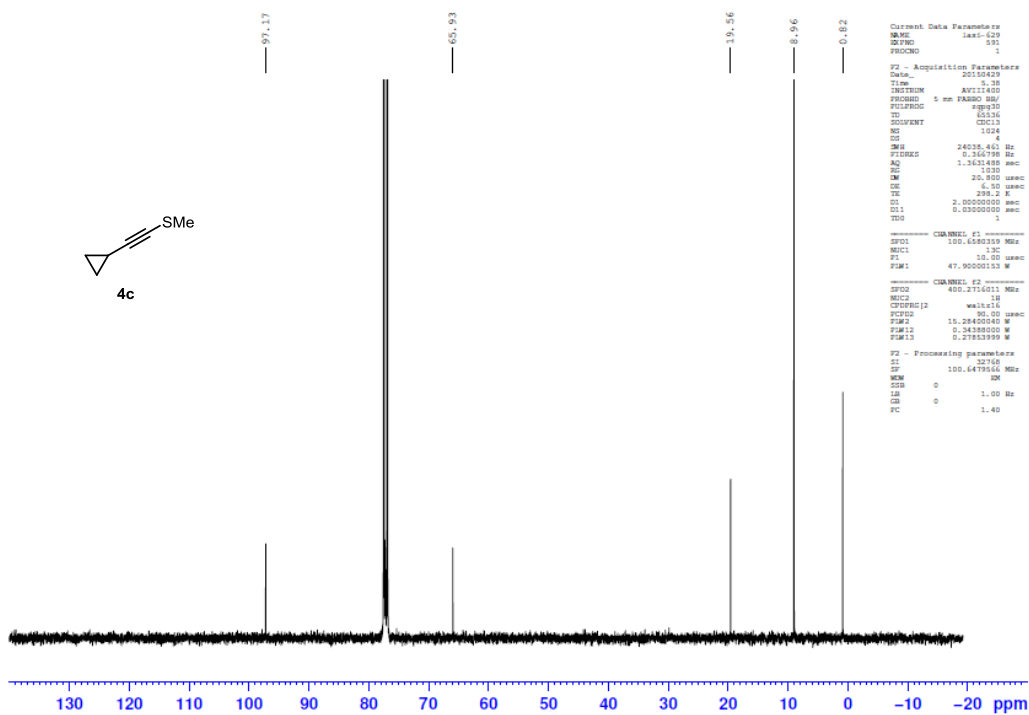

Supplementary Figure 43.  $^1\text{H}$  NMR and  $^{13}\text{C}$  NMR spectra of substrate **4c**

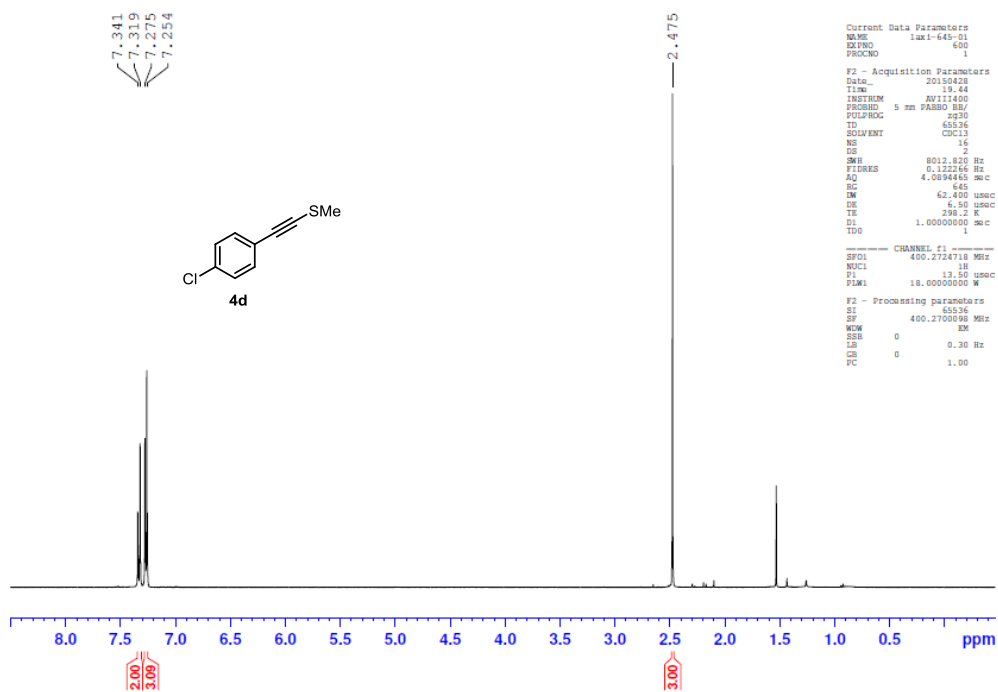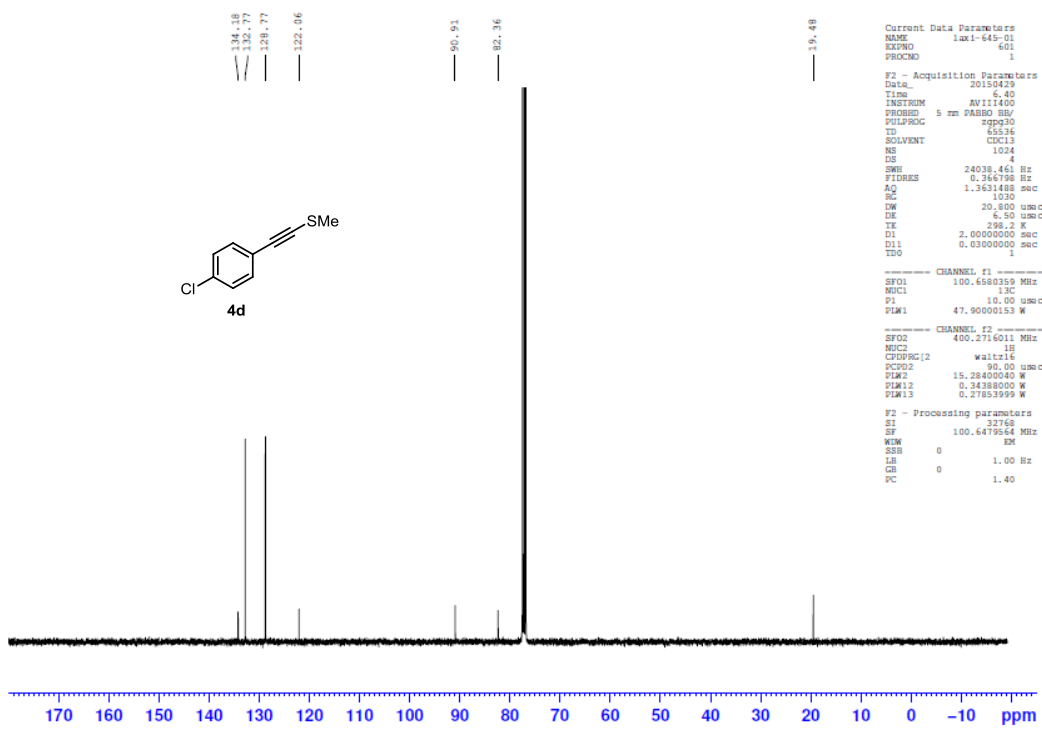

Supplementary Figure 44.  $^1\text{H}$  NMR and  $^{13}\text{C}$  NMR spectra of substrate **4d**

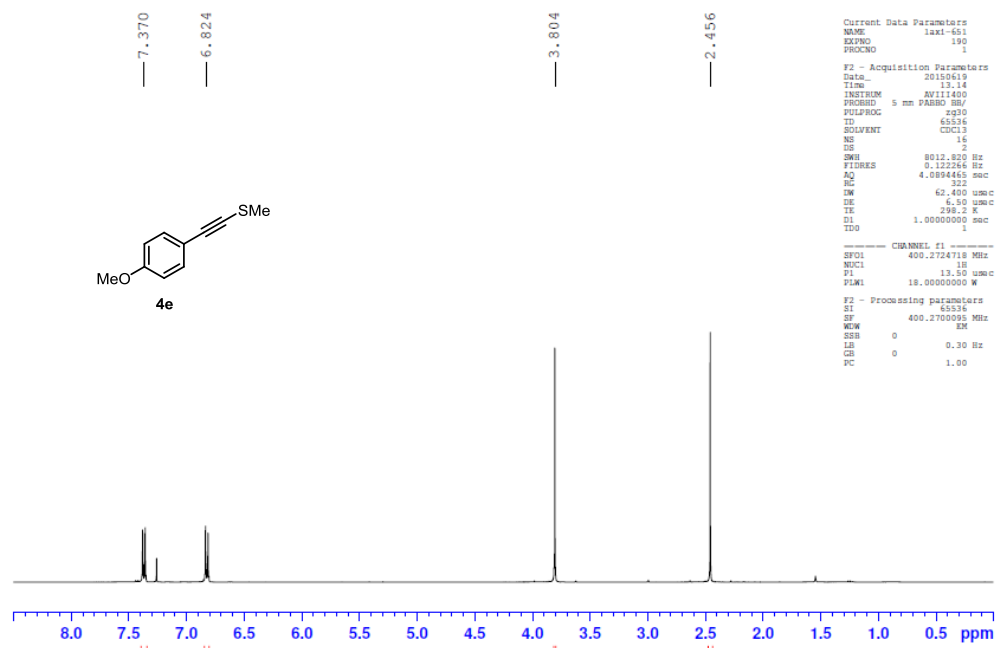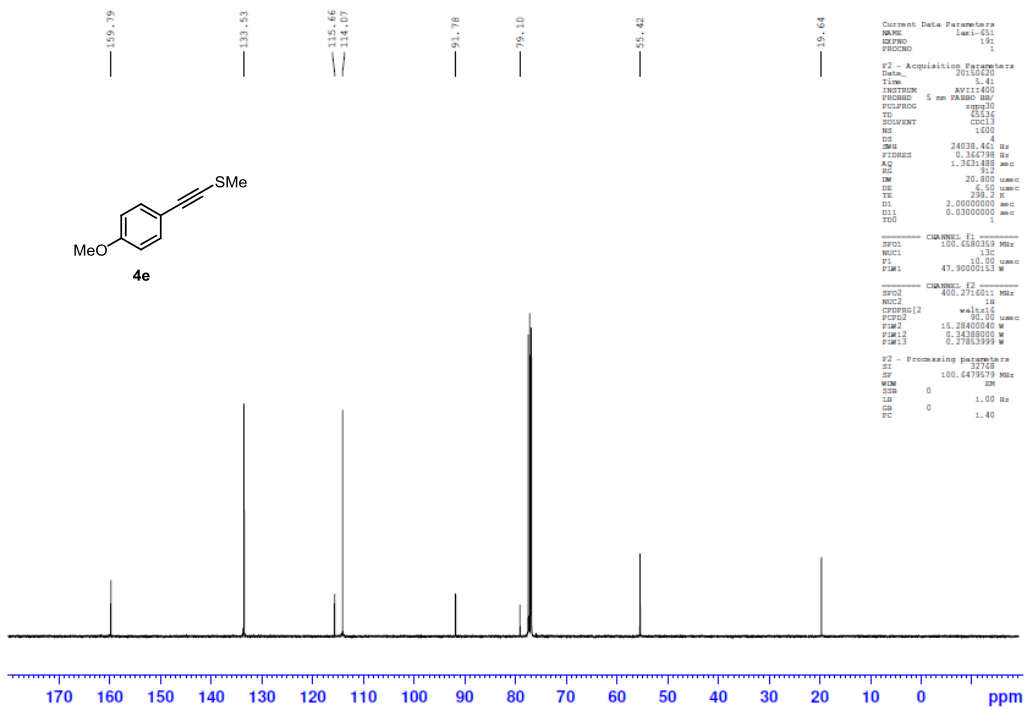

Supplementary Figure 45. <sup>1</sup>H NMR and <sup>13</sup>C NMR spectra of substrate **4e**

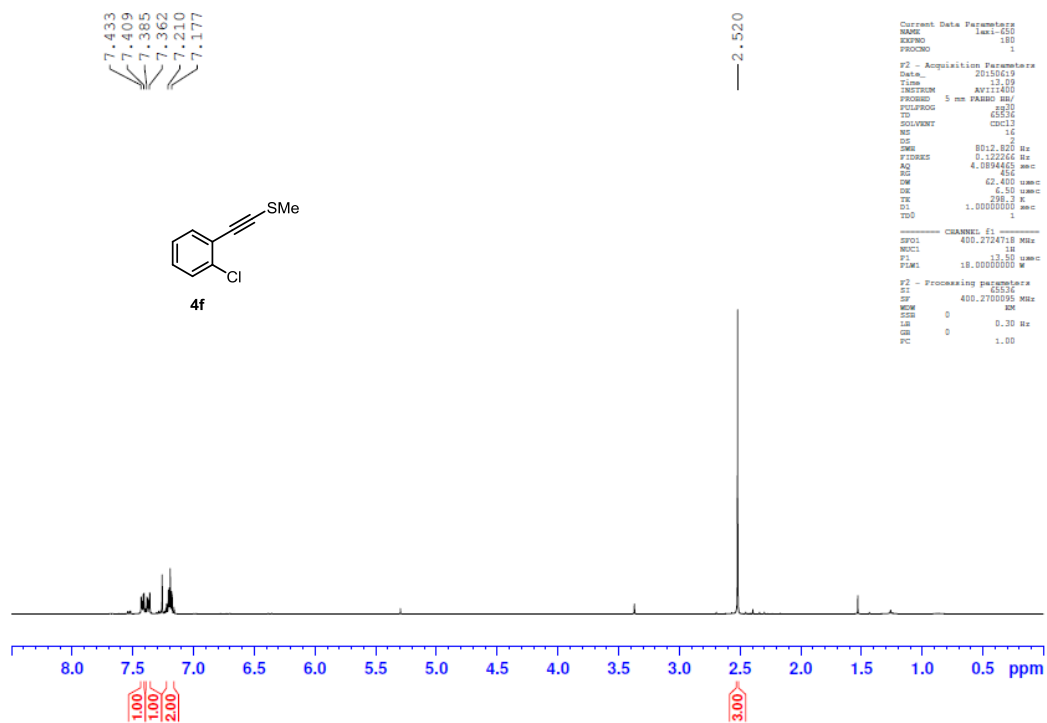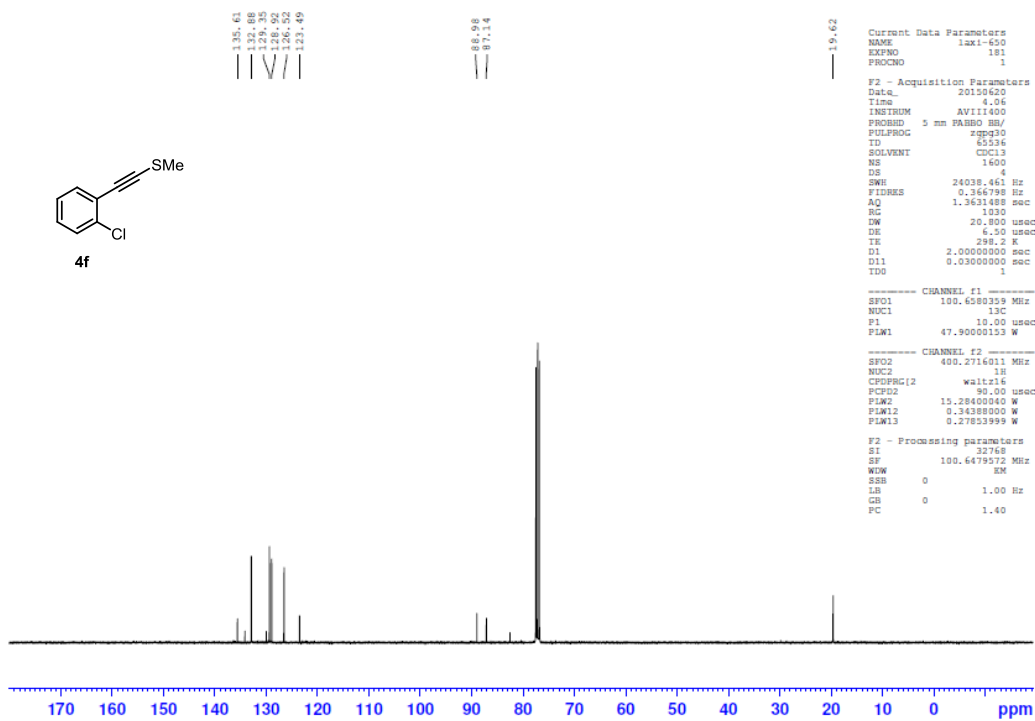

Supplementary Figure 46.  $^1\text{H}$  NMR and  $^{13}\text{C}$  NMR spectra of substrate **4f**

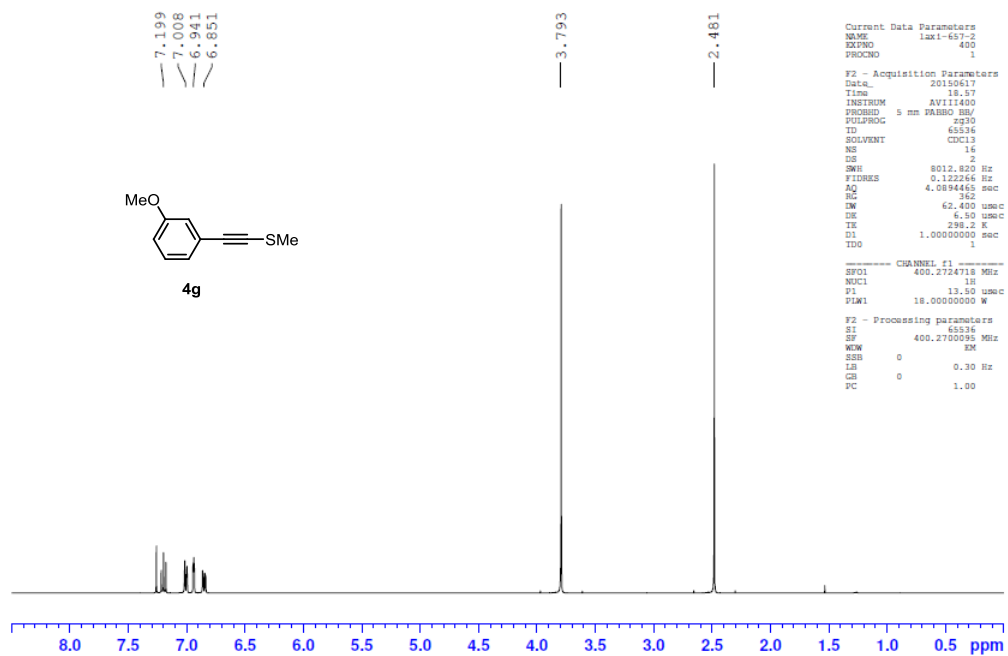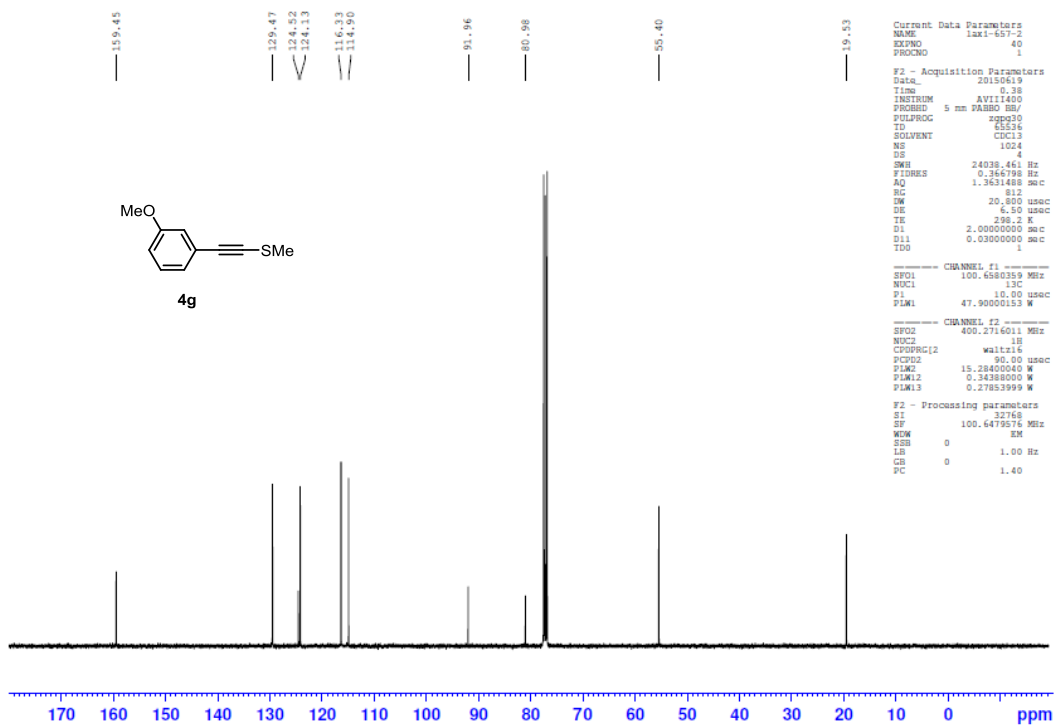

Supplementary Figure 47. <sup>1</sup>H NMR and <sup>13</sup>C NMR spectra of substrate 4g

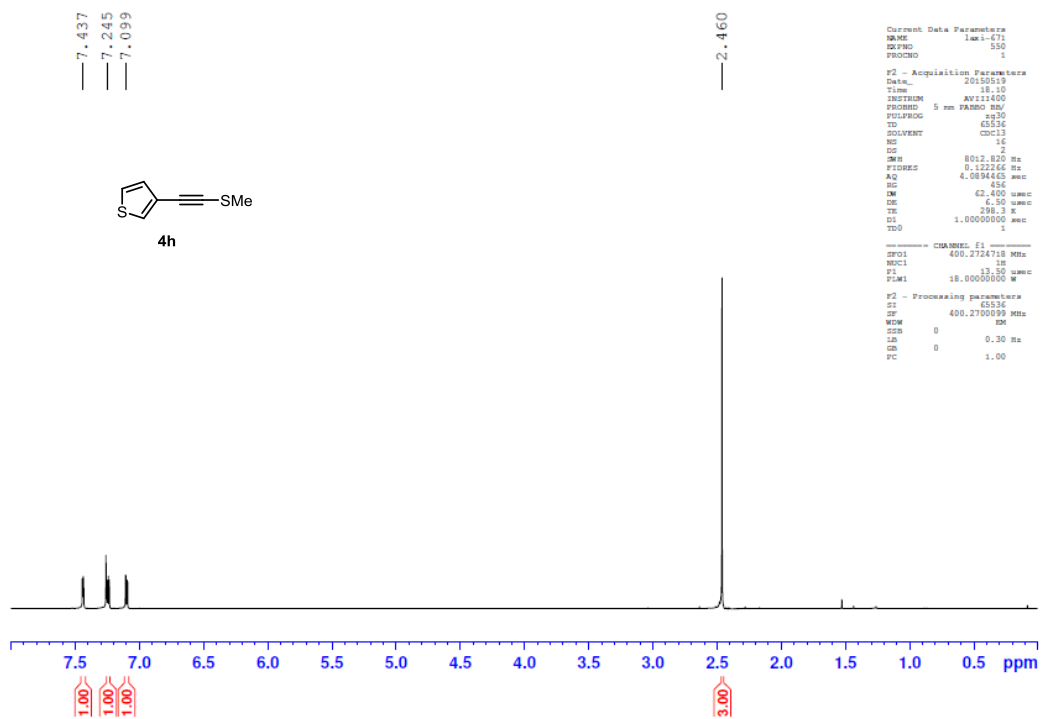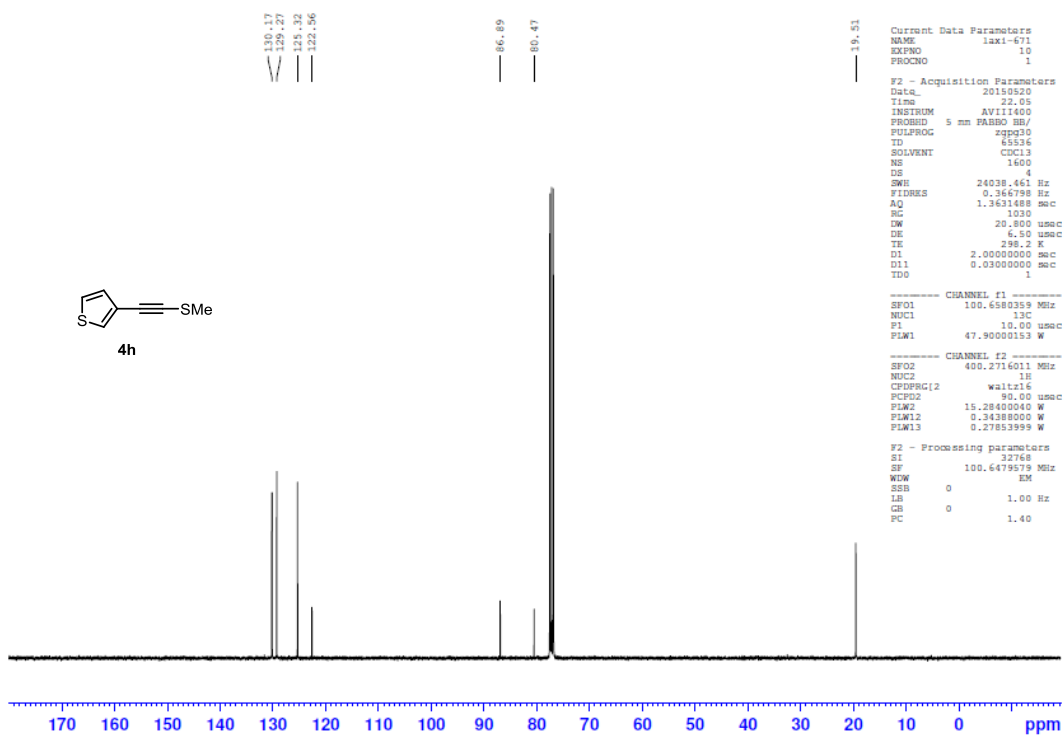

Supplementary Figure 48.  $^1\text{H}$  NMR and  $^{13}\text{C}$  NMR spectra of substrate **4h**



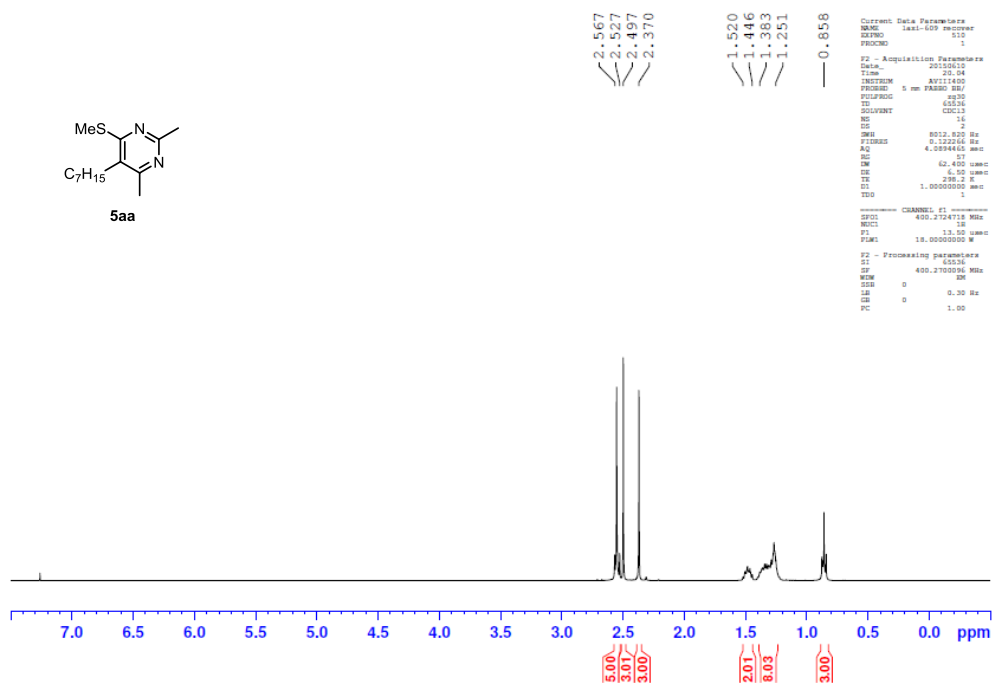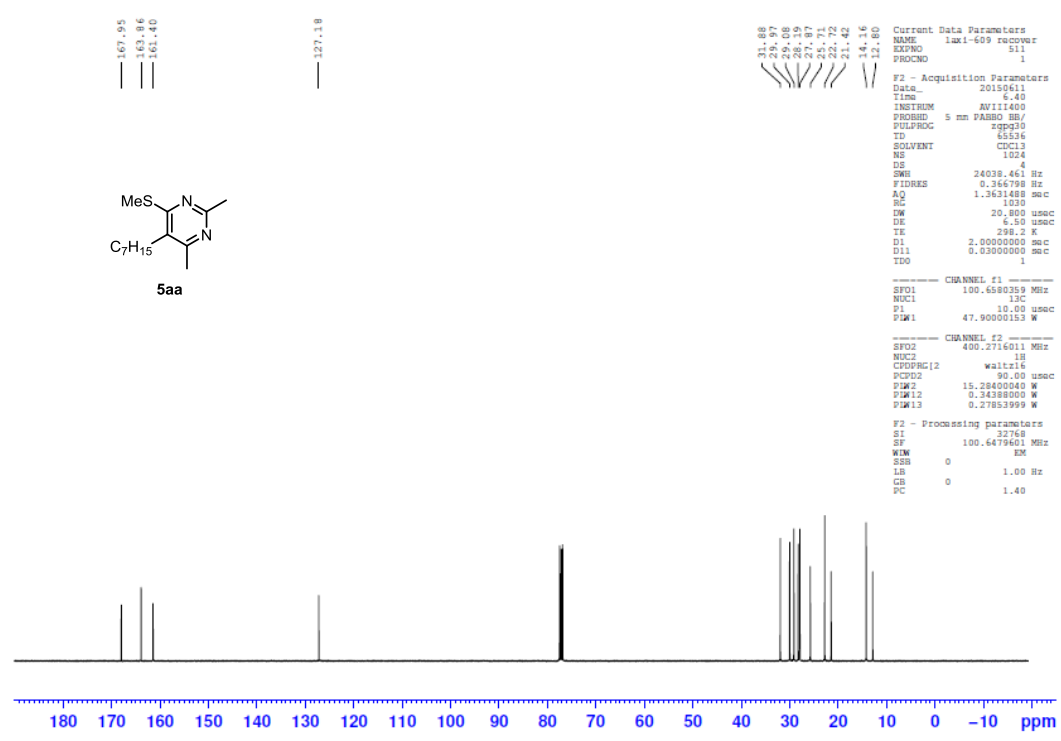

Supplementary Figure 49. <sup>1</sup>H NMR and <sup>13</sup>C NMR spectra of substrate 5aa

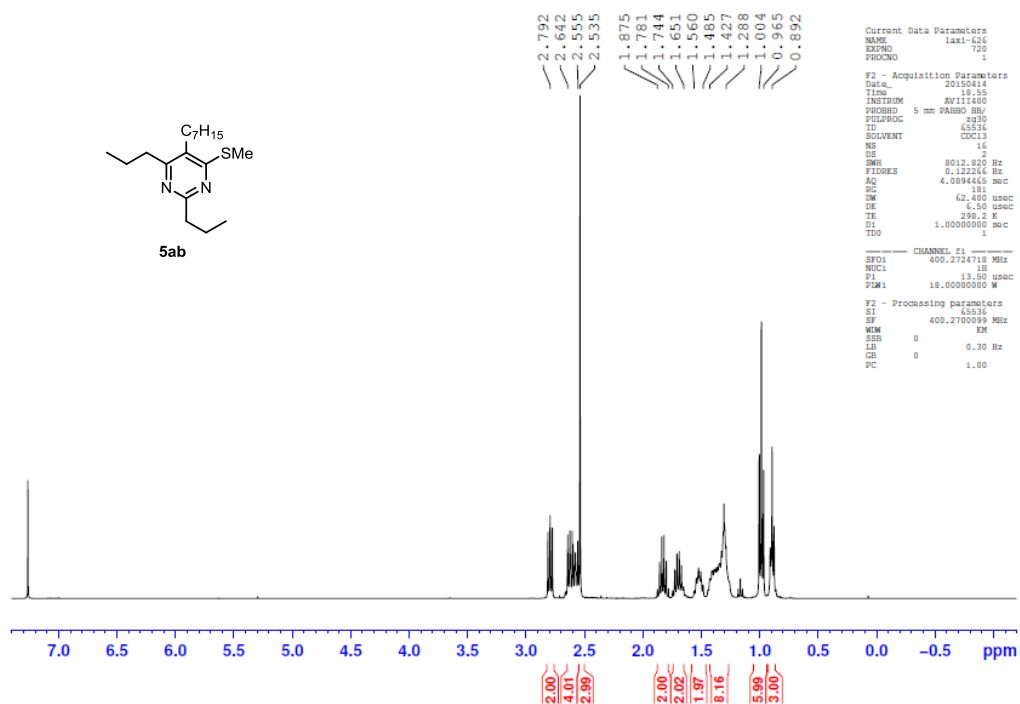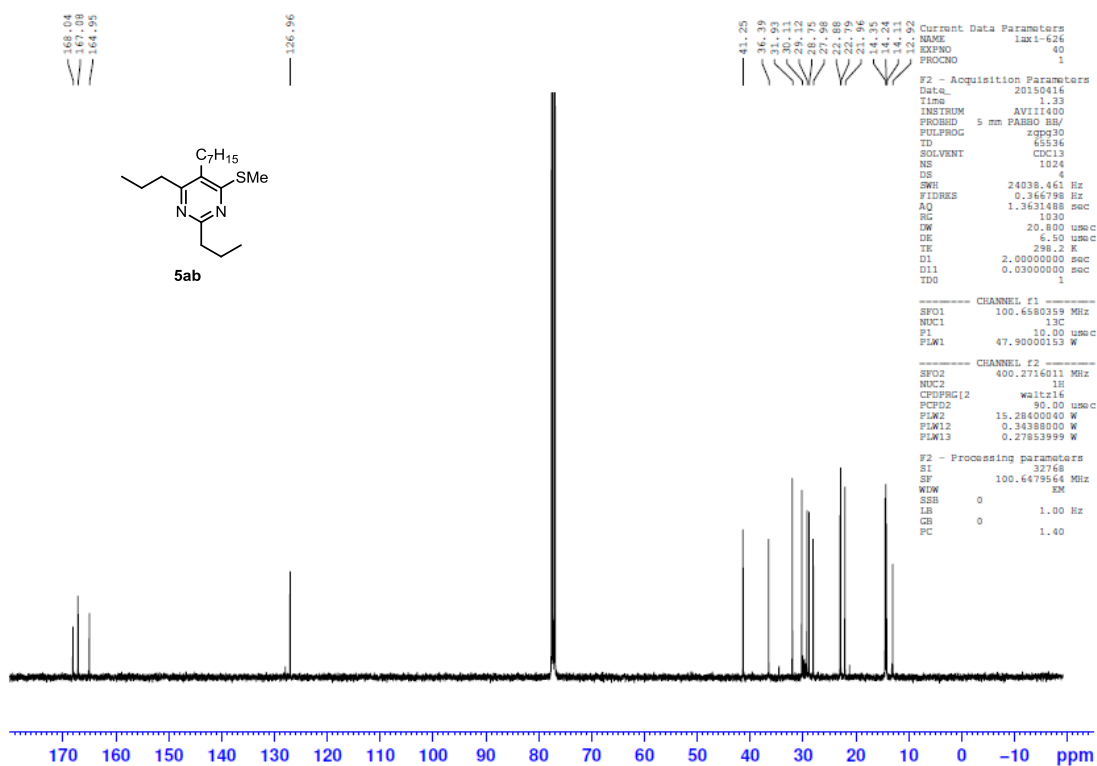

Supplementary Figure 50.  $^1\text{H}$  NMR and  $^{13}\text{C}$  NMR spectra of substrate **5ab**

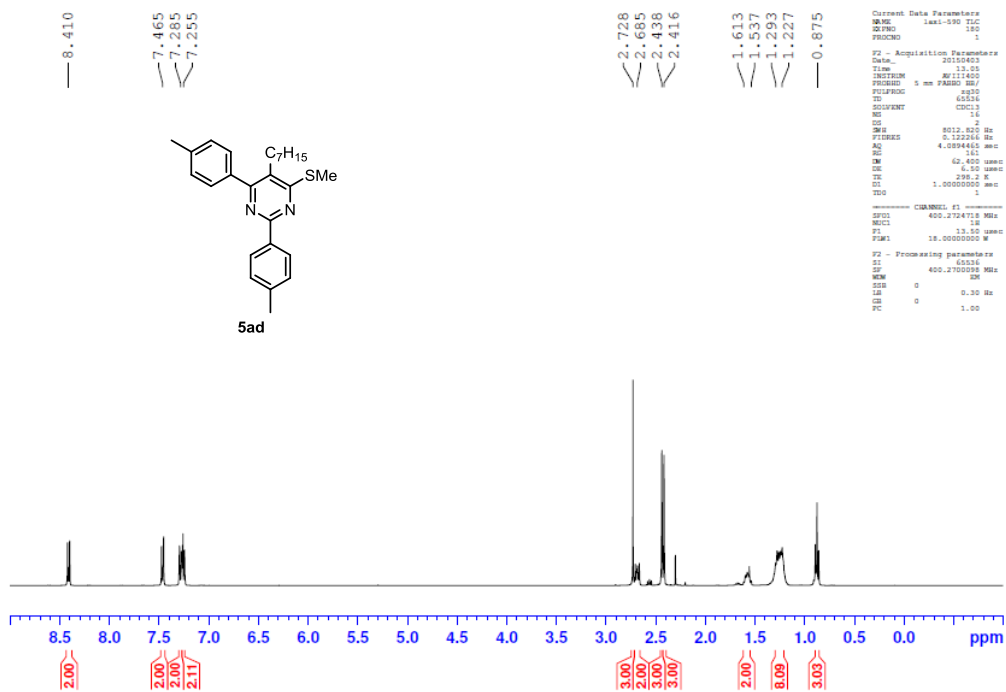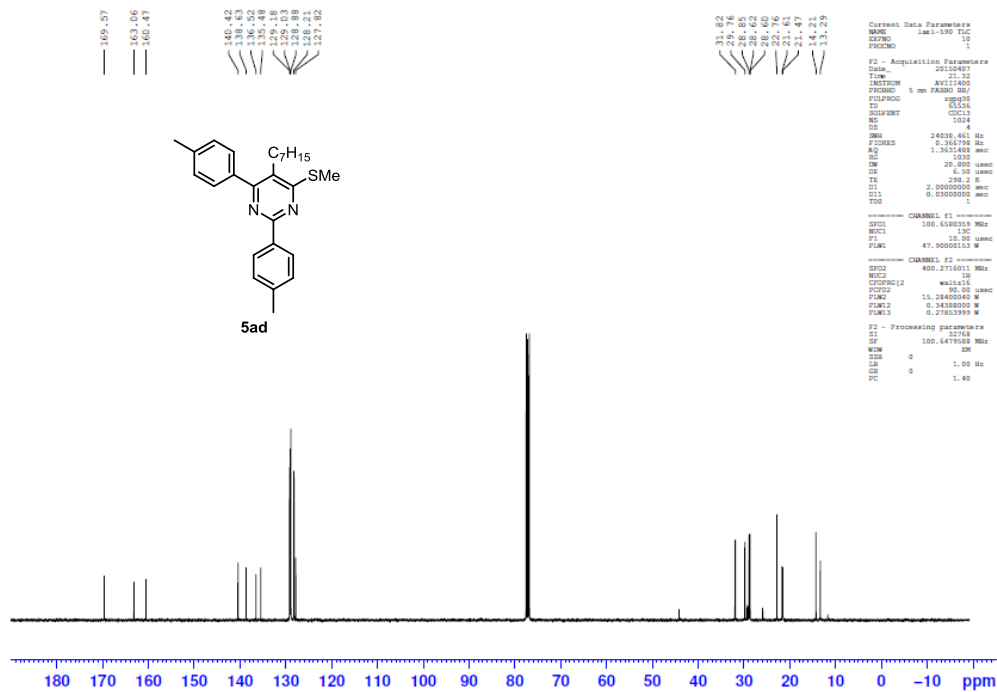

Supplementary Figure S1. <sup>1</sup>H NMR and <sup>13</sup>C NMR spectra of substrate **5ad**

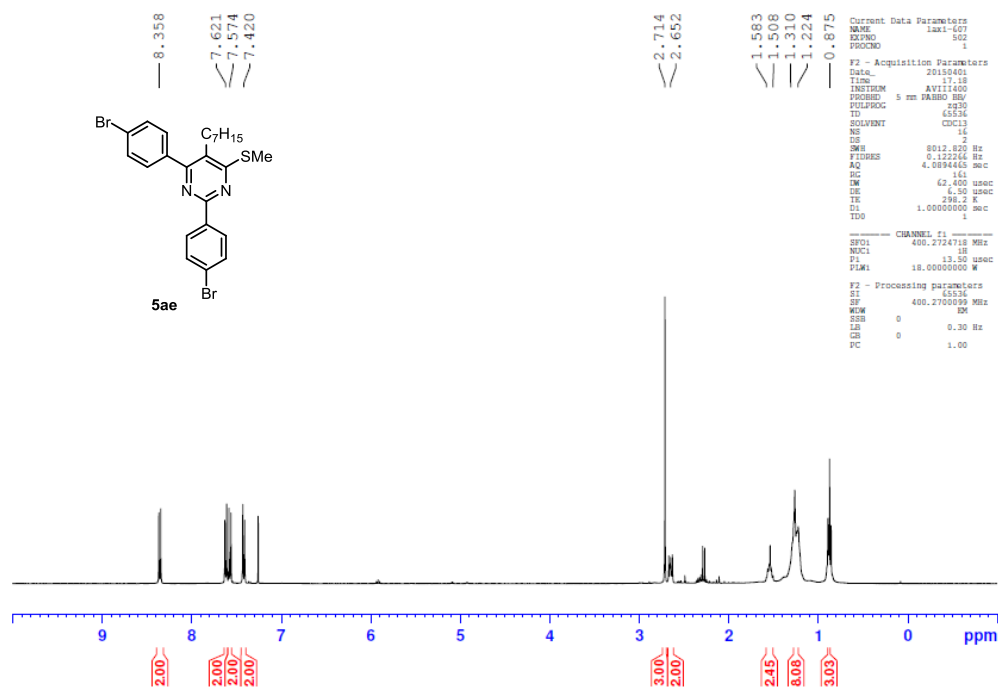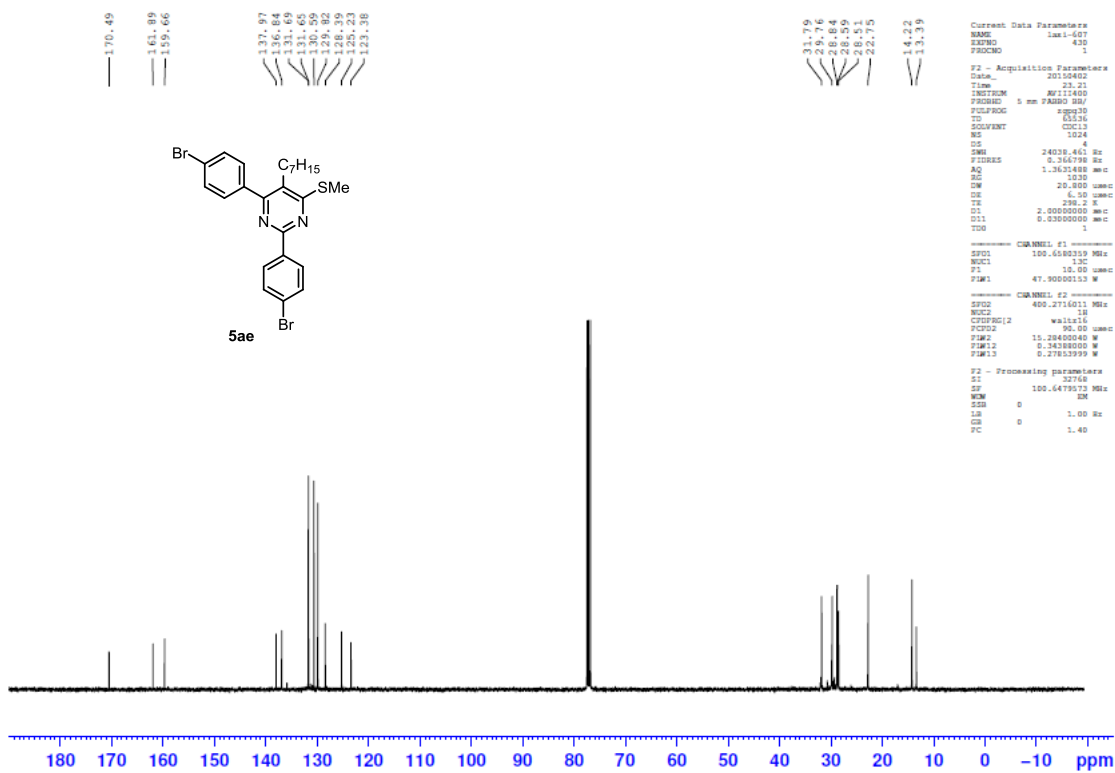

Supplementary Figure 52. <sup>1</sup>H NMR and <sup>13</sup>C NMR spectra of substrate **5ae**

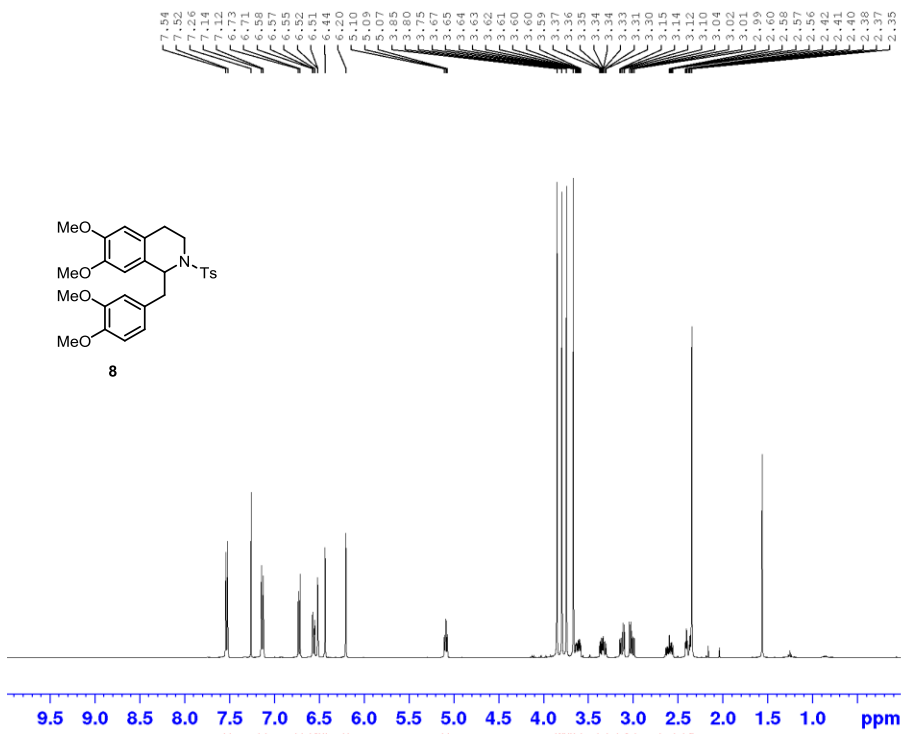

```

Current Data Parameters
NAME      SUNI-NE-Iso-nat
EXPNO    860
PROCNO   1

F2 - Acquisition Parameters
Date_    20150714
Time     19.19
INSTRUM  AVIII400
PROBHD   5 mm PABBO BB/
PULPROG  zg30
TD       65536
SOLVENT  CDCl3
NS       16
DS       2
SWH      8012.820 Hz
FIDRES   0.122266 Hz
AQ       4.0894465 sec
RG       406
DW       62.400 usec
DE       6.50 usec
TE       298.2 K
D1       1.0000000 sec
TDO      1

----- CHANNEL f1 -----
SFO1     400.2724718 MHz
NUC1     1H
P1       13.50 usec
PLW1     18.0000000 W

F2 - Processing parameters
SI       65536
SF       400.2700096 MHz
WDW      EM
SSB      0
LB       0.30 Hz
GB       0
PC       1.00
  
```

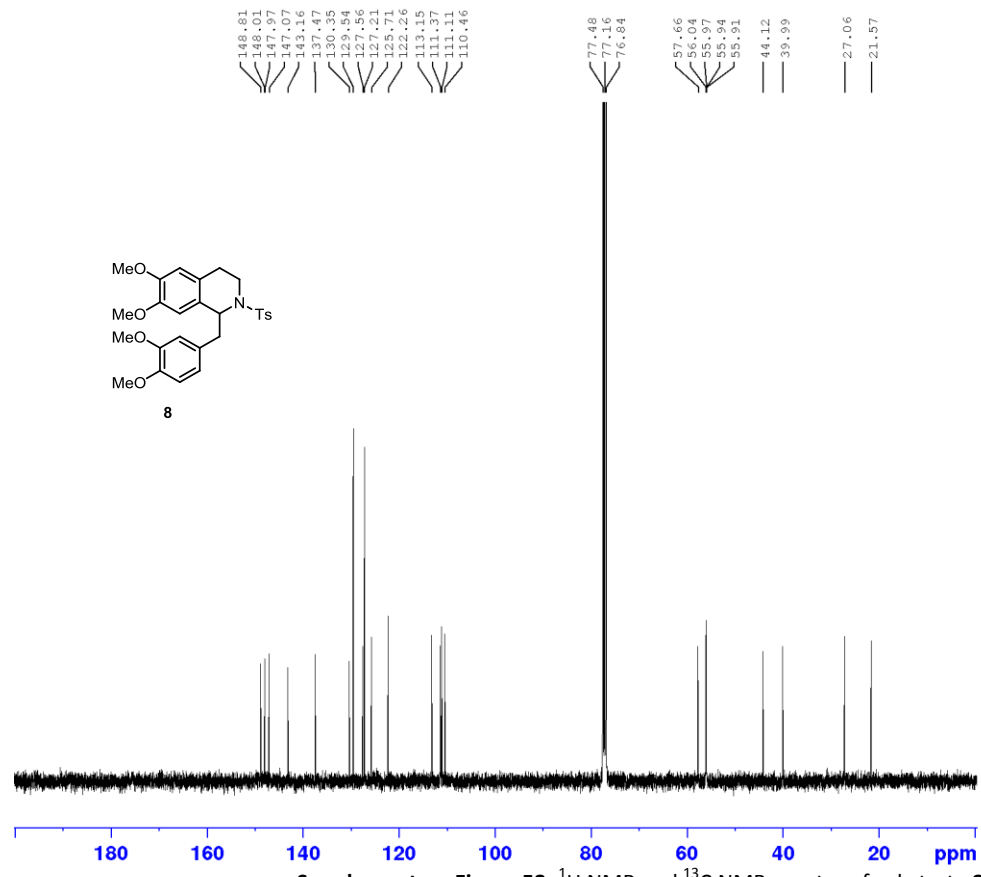

```

Current Data Parameters
NAME      SUNI-NE-Iso-nat
EXPNO    11
PROCNO   1

F2 - Acquisition Parameters
Date_    20150715
Time     21.47
INSTRUM  AVIII400
PROBHD   5 mm PABBO BB/
PULPROG  zgpg30
TD       65536
SOLVENT  CDCl3
NS       1024
DS       4
SWH      24038.461 Hz
FIDRES   0.366798 Hz
AQ       1.3631488 sec
RG       724
DW       20.800 usec
DE       6.50 usec
TE       298.2 K
D1       2.0000000 sec
D11      0.0300000 sec
TDO      1

----- CHANNEL f1 -----
SFO1     100.6580359 MHz
NUC1     13C
P1       10.00 usec
PLW1     47.90000153 W

----- CHANNEL f2 -----
SFO2     400.2716011 MHz
NUC2     1H
CPDPRG[2] waltz16
PCPD2    90.00 usec
PLW2     15.28400040 W
PLW12    0.34388000 W
PLW13    0.27853999 W

F2 - Processing parameters
SI       32768
SF       100.6479580 MHz
WDW      EM
SSB      0
LB       1.00 Hz
GB       0
PC       1.40
  
```

Supplementary Figure S3. <sup>1</sup>H NMR and <sup>13</sup>C NMR spectra of substrate 8

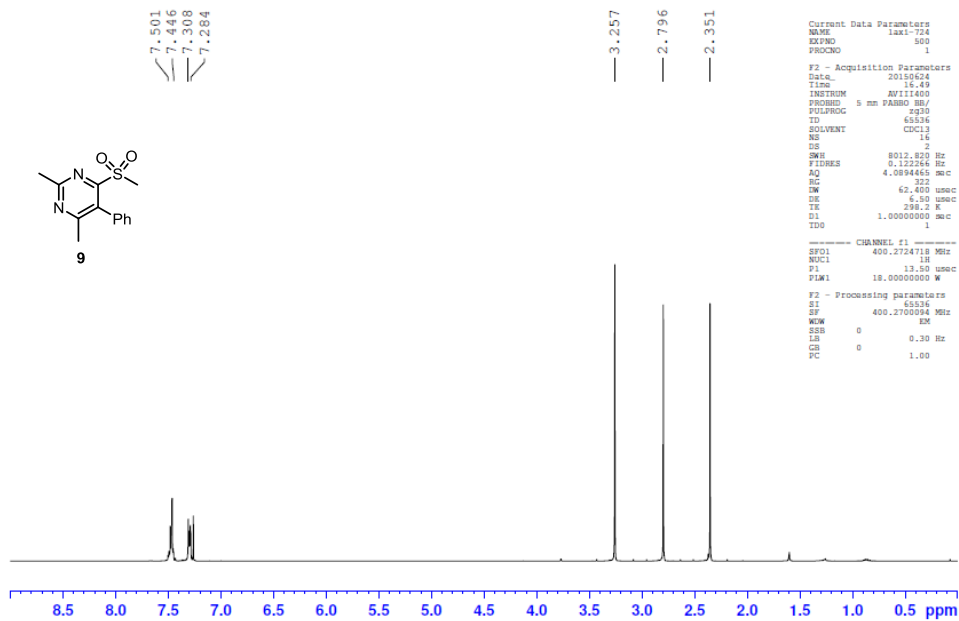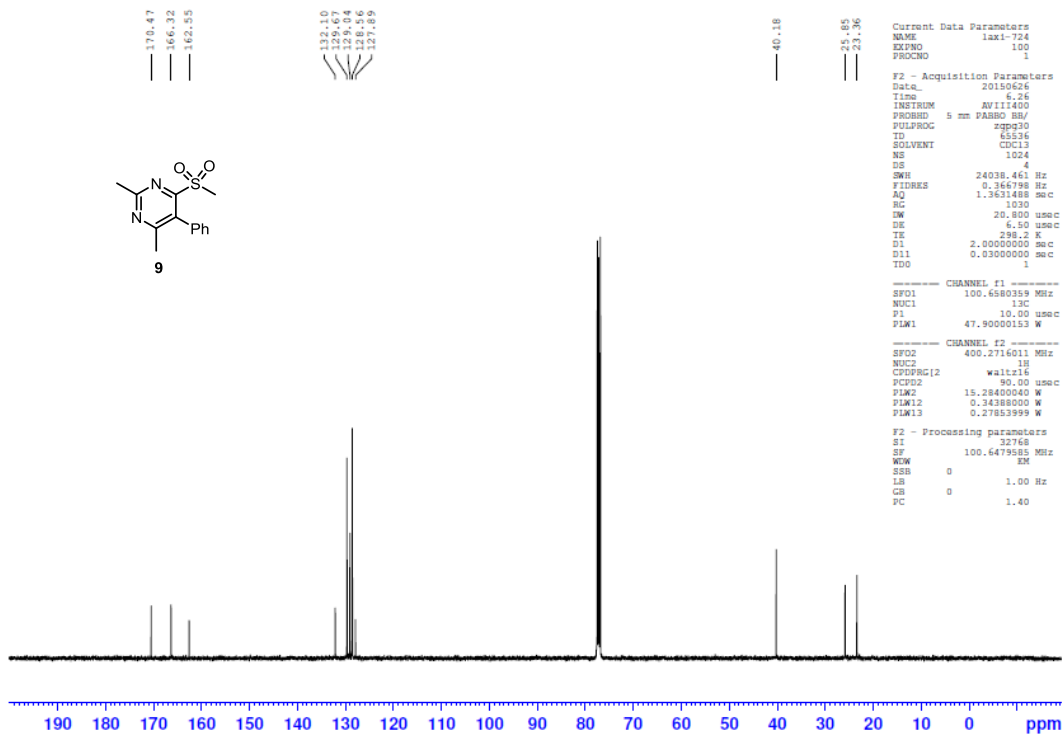

Supplementary Figure 54.  $^1\text{H}$  NMR and  $^{13}\text{C}$  NMR spectra of substrate 9

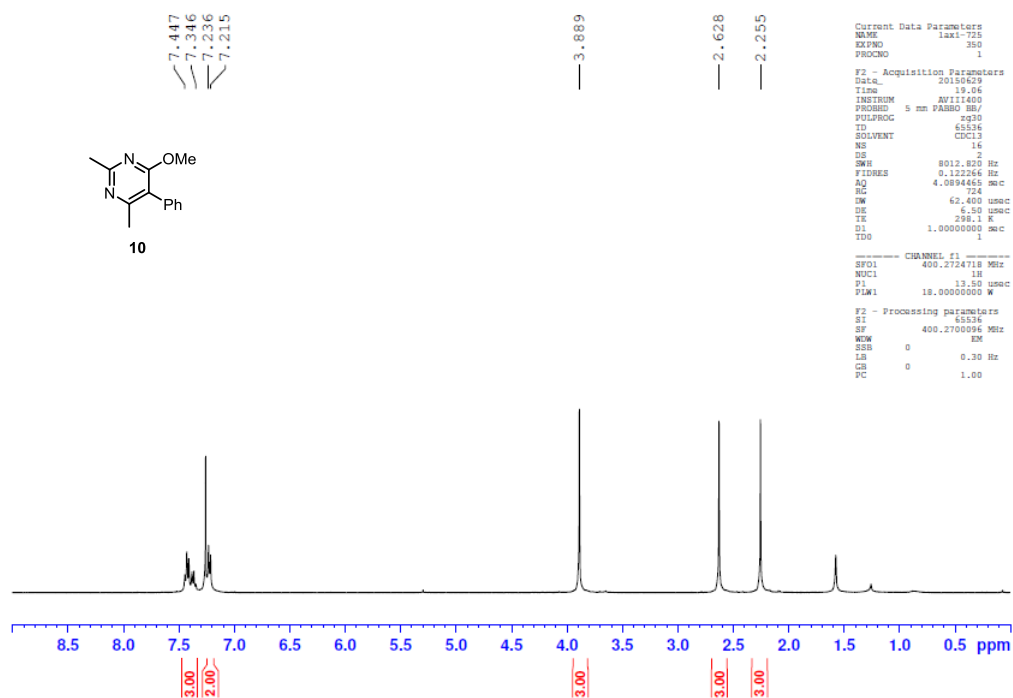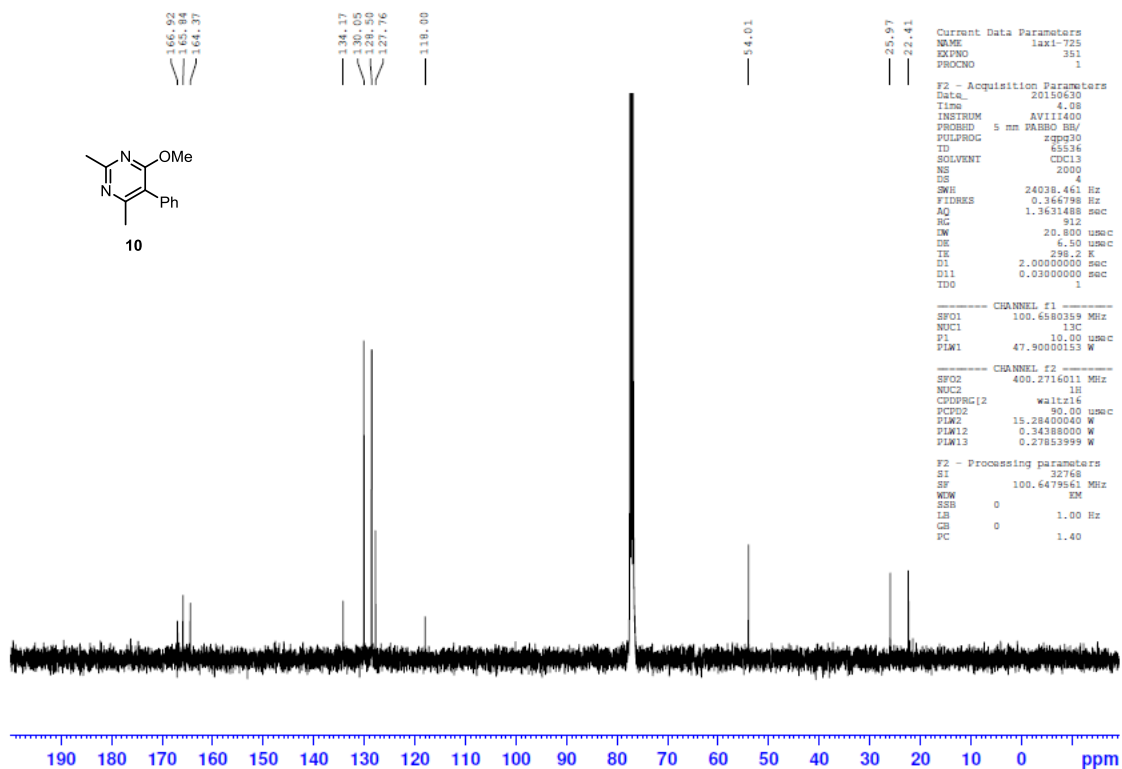

Supplementary Figure S5. <sup>1</sup>H NMR and <sup>13</sup>C NMR spectra of substrate **10**

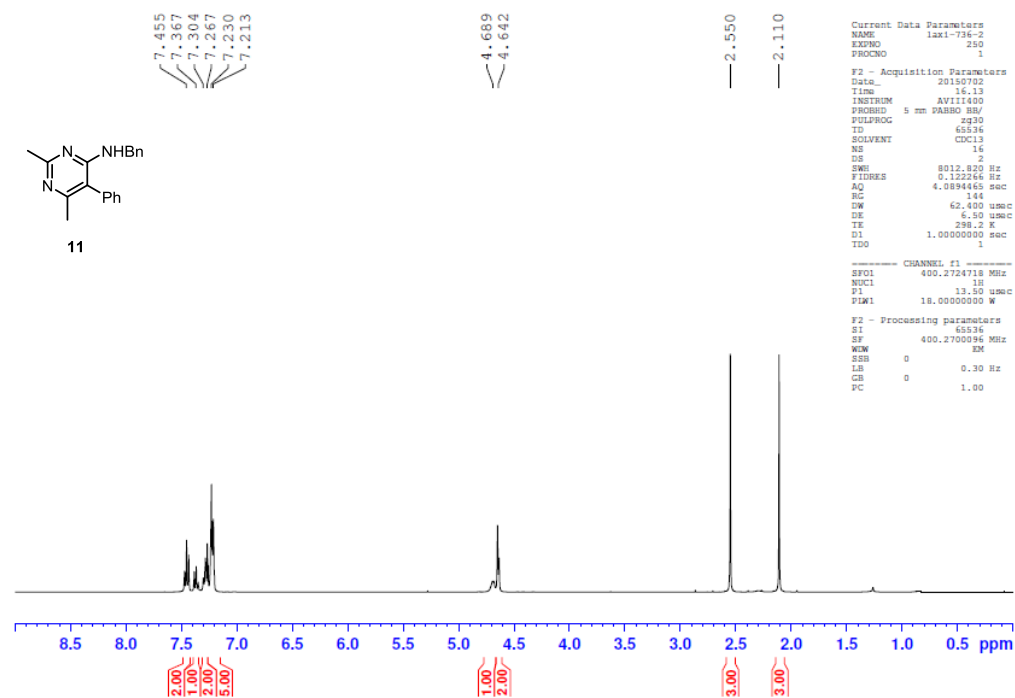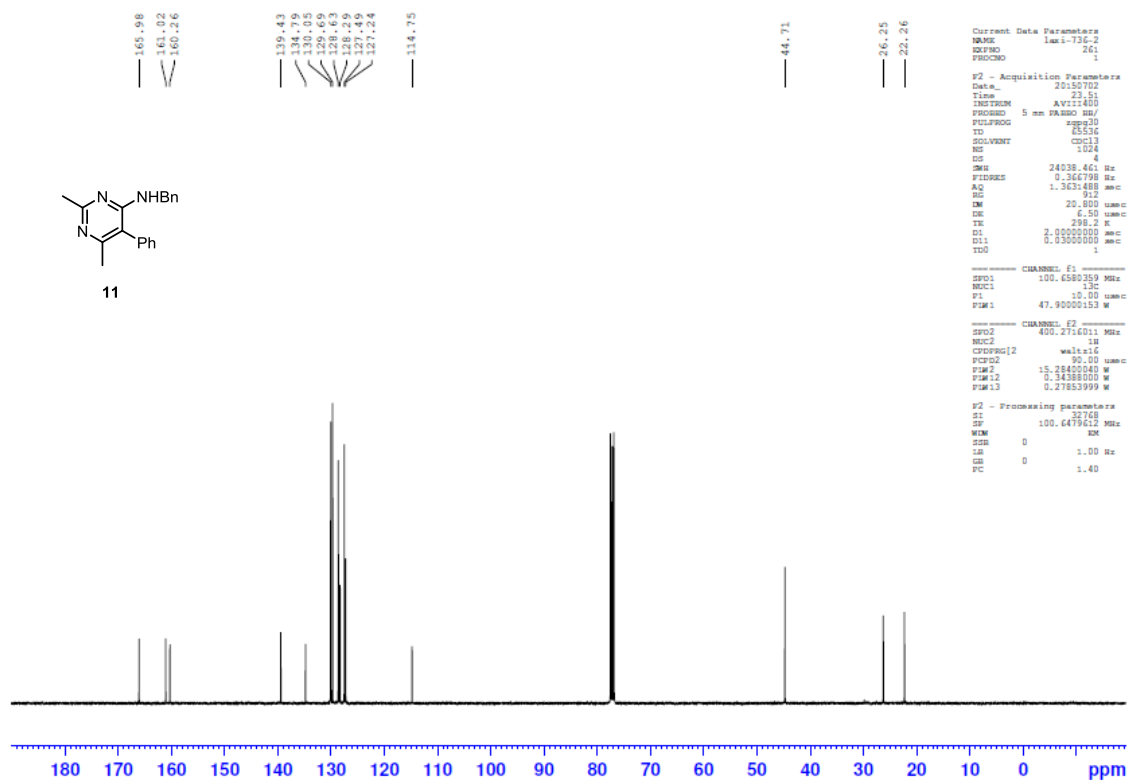

Supplementary Figure S6. <sup>1</sup>H NMR and <sup>13</sup>C NMR spectra of substrate **11**



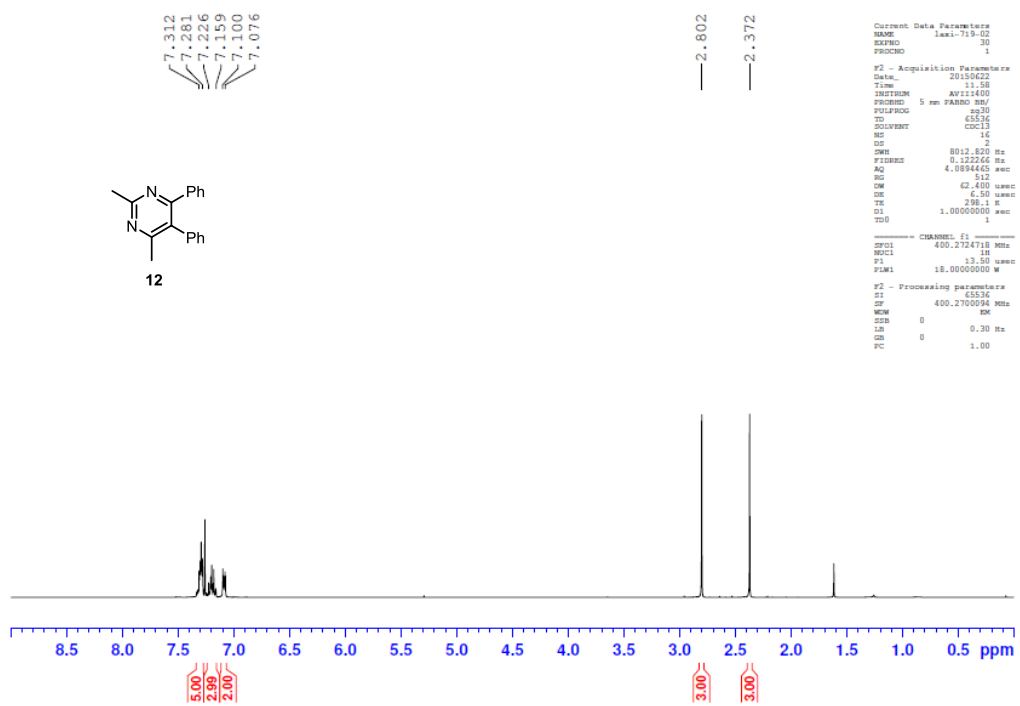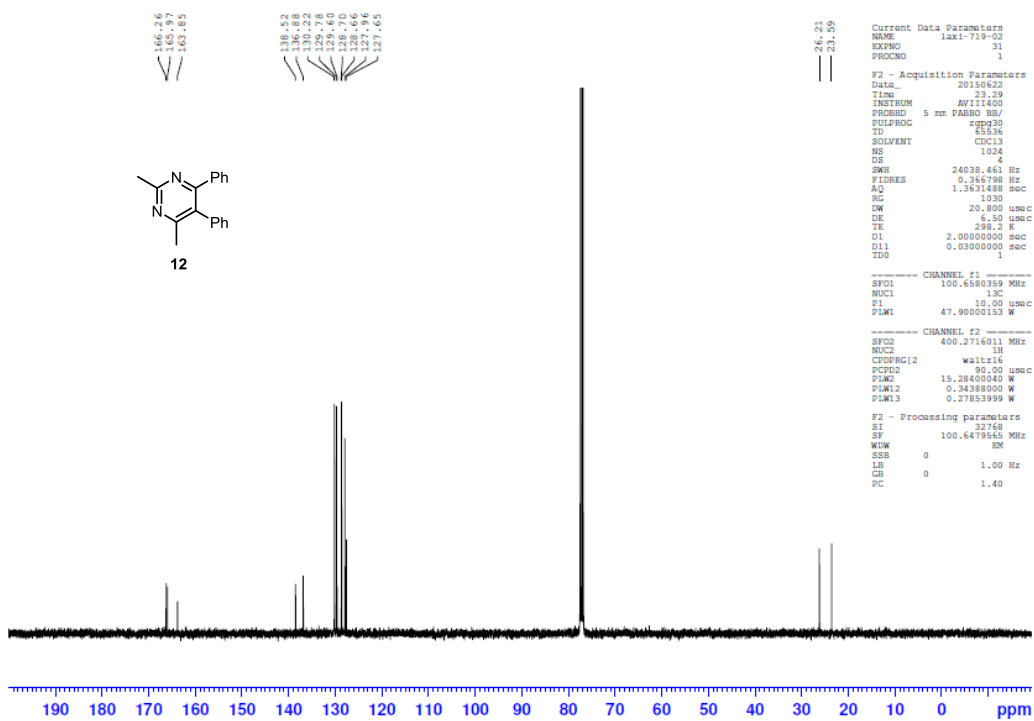

Supplementary Figure S57. <sup>1</sup>H NMR and <sup>13</sup>C NMR spectra of substrate **12**

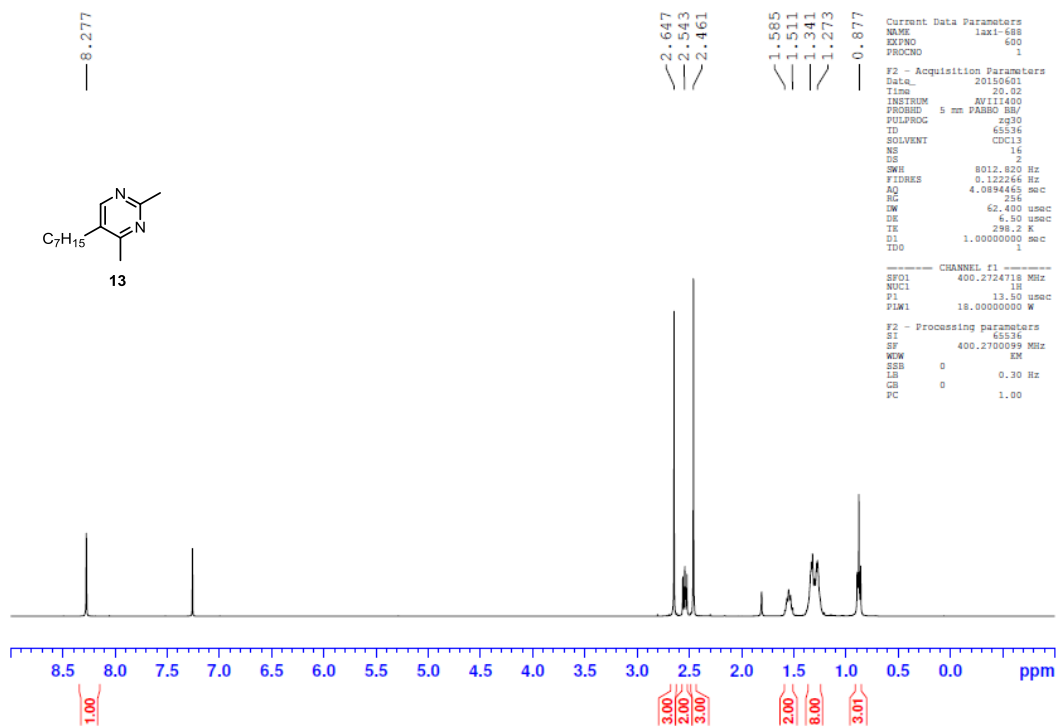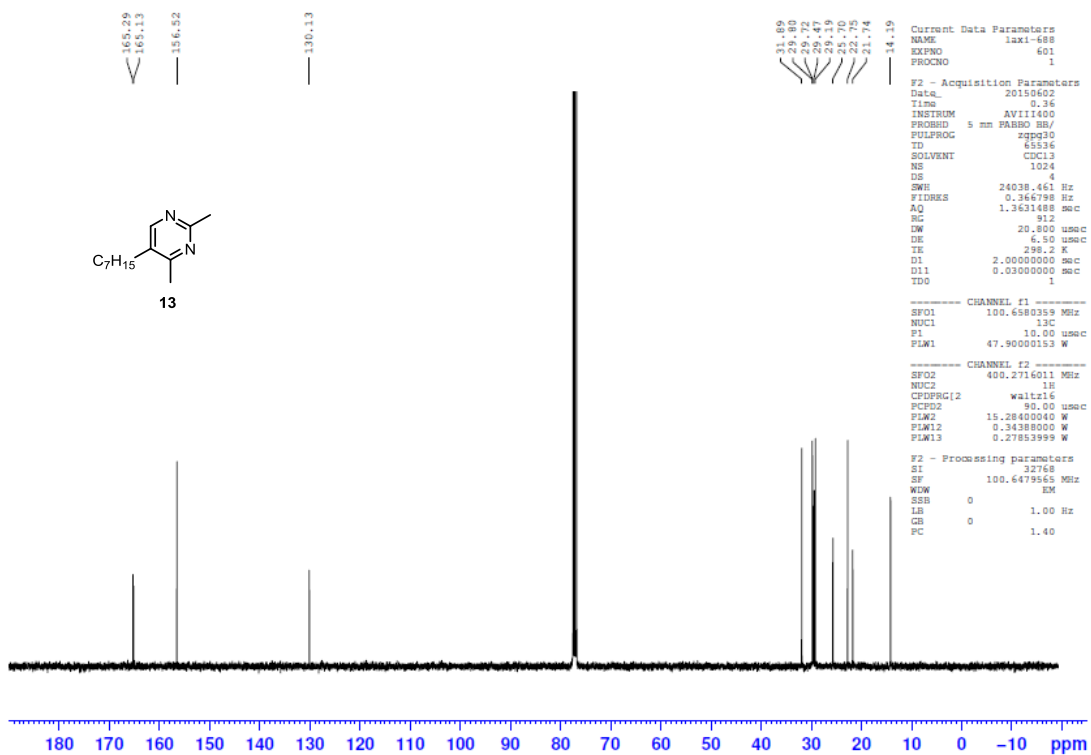

Supplementary Figure 58.  $^1\text{H}$  NMR and  $^{13}\text{C}$  NMR spectra of substrate **13**

# Report

## Sample Information

Sample Name : Laxi-536(Rac) ap  
Sample ID :  
Vial# : 1  
Injection Volume : 8  
Data File : Laxi-536(Rac) ap\_19.02.2015\_1\_005.lcd  
Method File : Run\_Heptan70%\_EtOH30%F1.icm  
Batch File : 19.02.2015\_1.lcb  
Report Format File : REPORTLux\_Hep7\_EtOH3F1.lsr  
Date Acquired : 19.02.2015 13:12:55  
Date Processed : 19.02.2015 13:37:52

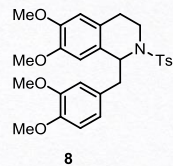

Method Description:  
Column: Lux-3 Cellulose-3  
150x4.6mm Particle Size 3 micrometer  
Solvent System: (n-Heptan+0,1%IPA)/EtOH 7:3  
Flow=1 ml/min T=25°C

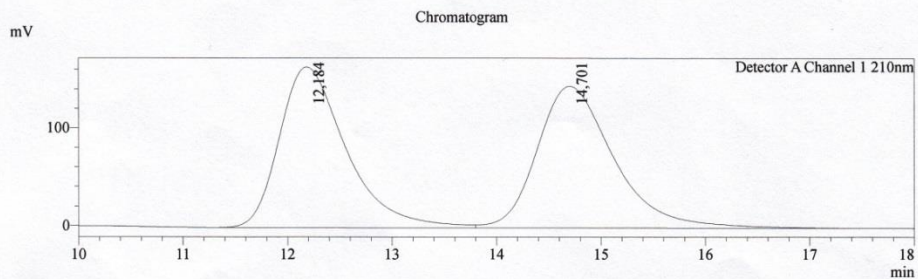

Peak Table

| Peak# | Ret. Time | Area     | Area%   |
|-------|-----------|----------|---------|
| 1     | 12.184    | 7309808  | 49.665  |
| 2     | 14.701    | 7408387  | 50.335  |
| Total |           | 14718196 | 100.000 |

Supplementary Figure 59. HPLC spectra for racemic product 8

# Report

## Sample Information

Sample Name : Laxi-537  
Sample ID :  
Vial# : 3  
Injection Volume : 8  
Data File : Laxi-537\_19.02.2015\_1\_001.lcd  
Method File : Run\_Heptan70%\_EtOH30%F1.lcm  
Batch File : 19.02.2015\_1.lcb  
Report Format File : REPORTLux\_Hep7\_EtOH3F1.lsr  
Date Acquired : 19.02.2015 13:32:57  
Date Processed : 19.02.2015 13:56:21

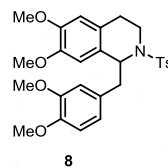

Method Description:  
Column: Lux-3 Cellulose-3  
150x4,6mm Particle Size 3 micrometer  
Solvent System: (n-Heptan+0,1%IPA)/EtOH 7:3  
Flow=1 ml/min T=25°C

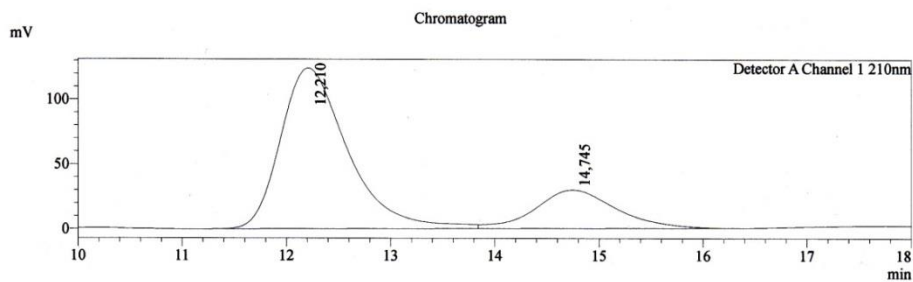

Peak Table

| Peak# | Ret. Time | Area    | Area%   |
|-------|-----------|---------|---------|
| 1     | 12,210    | 5566492 | 77,594  |
| 2     | 14,745    | 1607333 | 22,406  |
| Total |           | 7173825 | 100,000 |

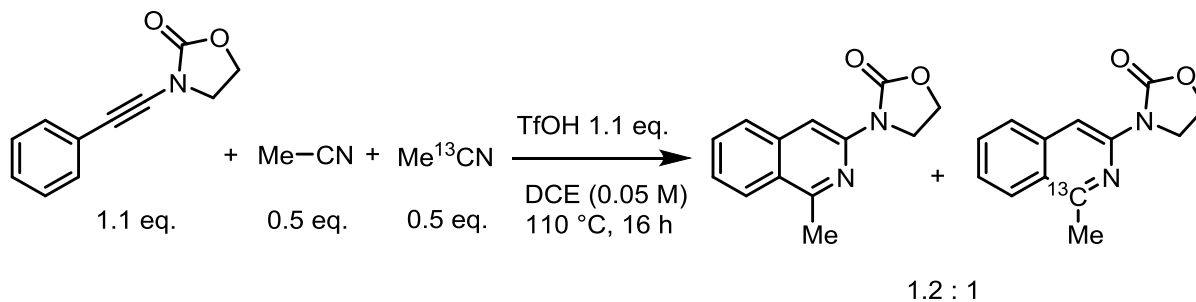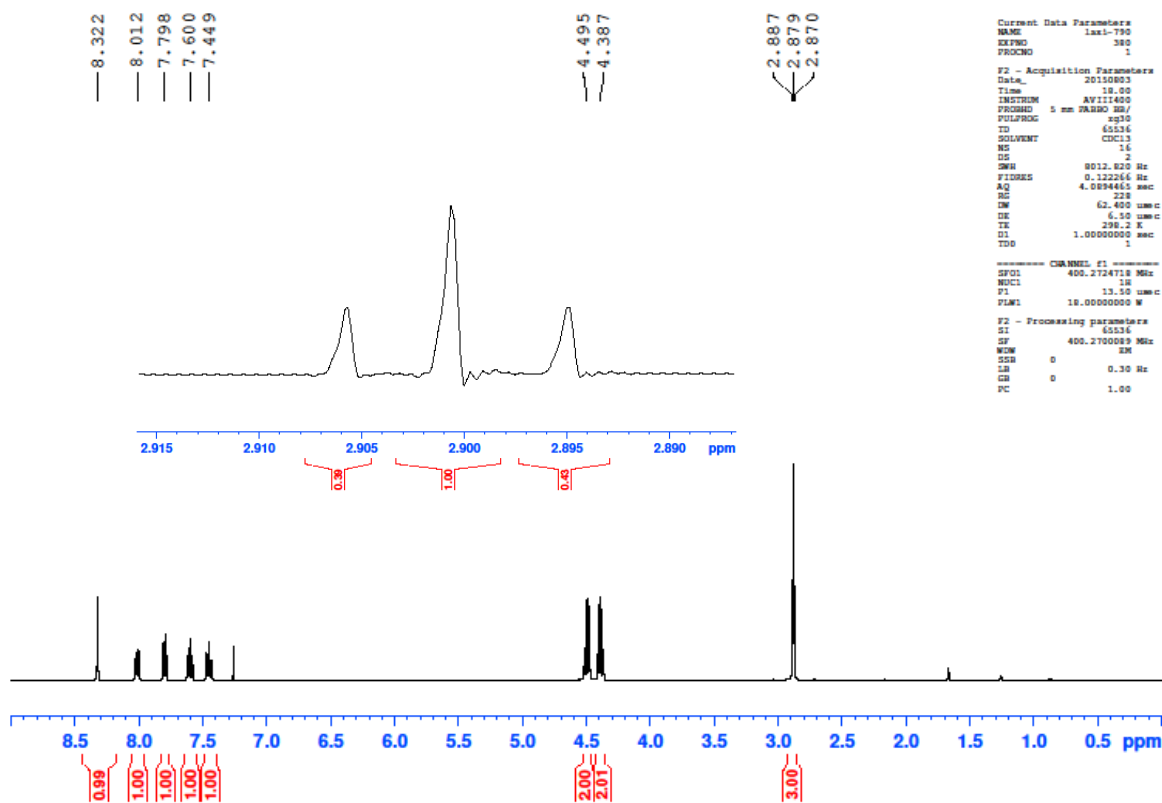

Supplementary Figure 61. Kinetic isotope effect.

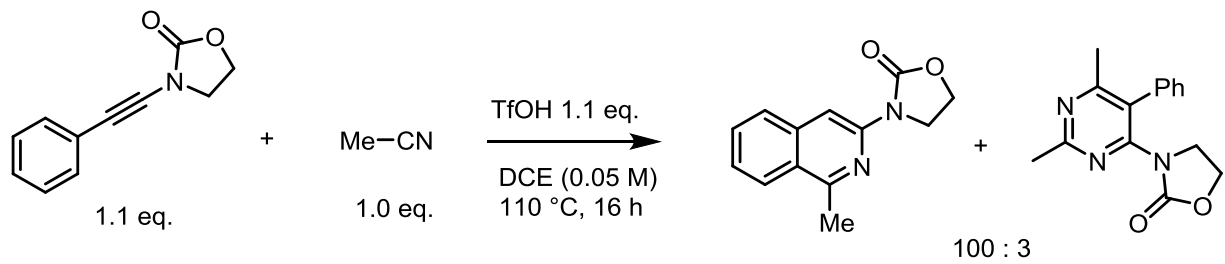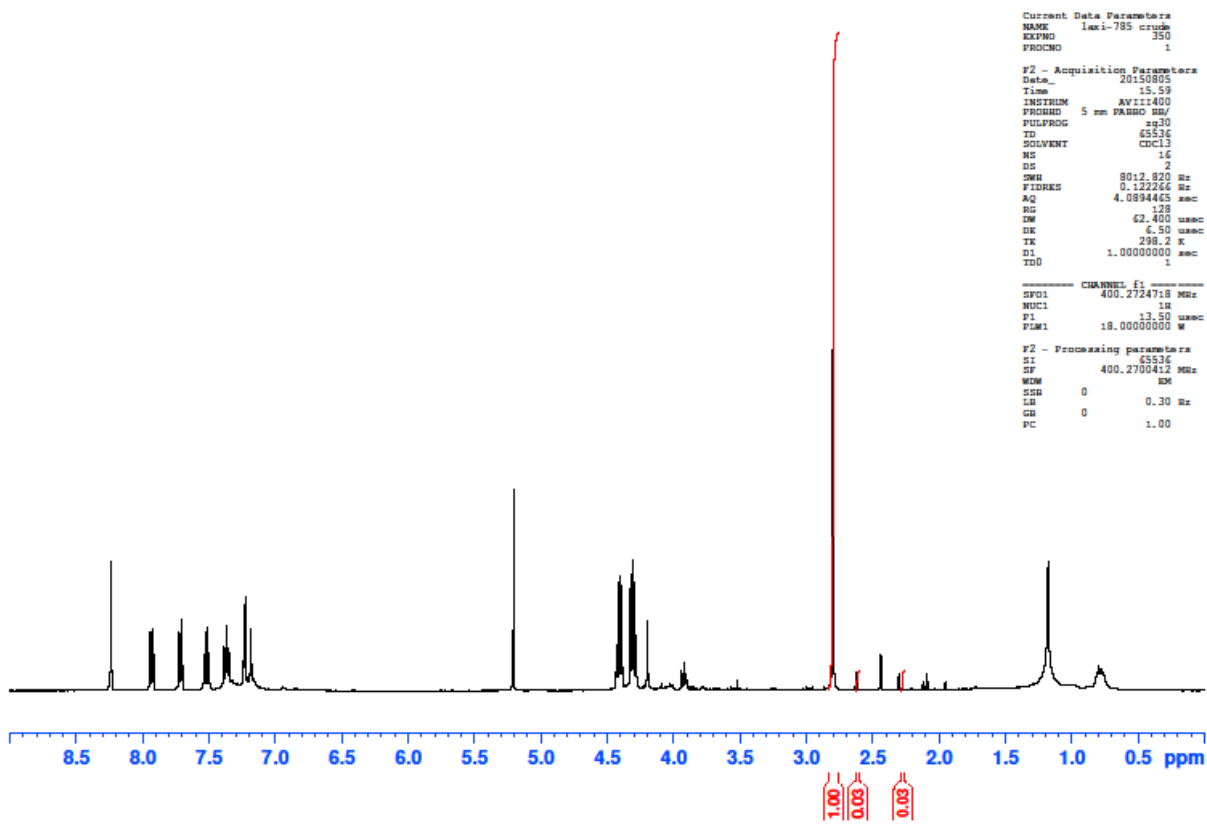

Supplementary Figure 62. Orthogonality in the synthesis of heterocycles (using 1.0 eq. of MeCN).

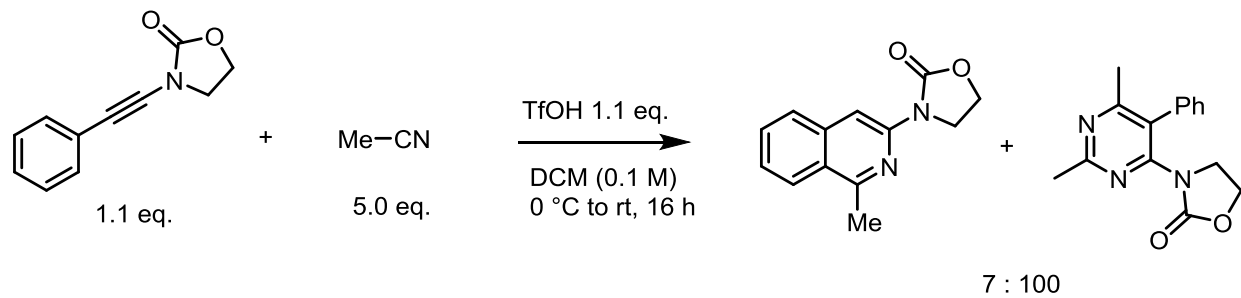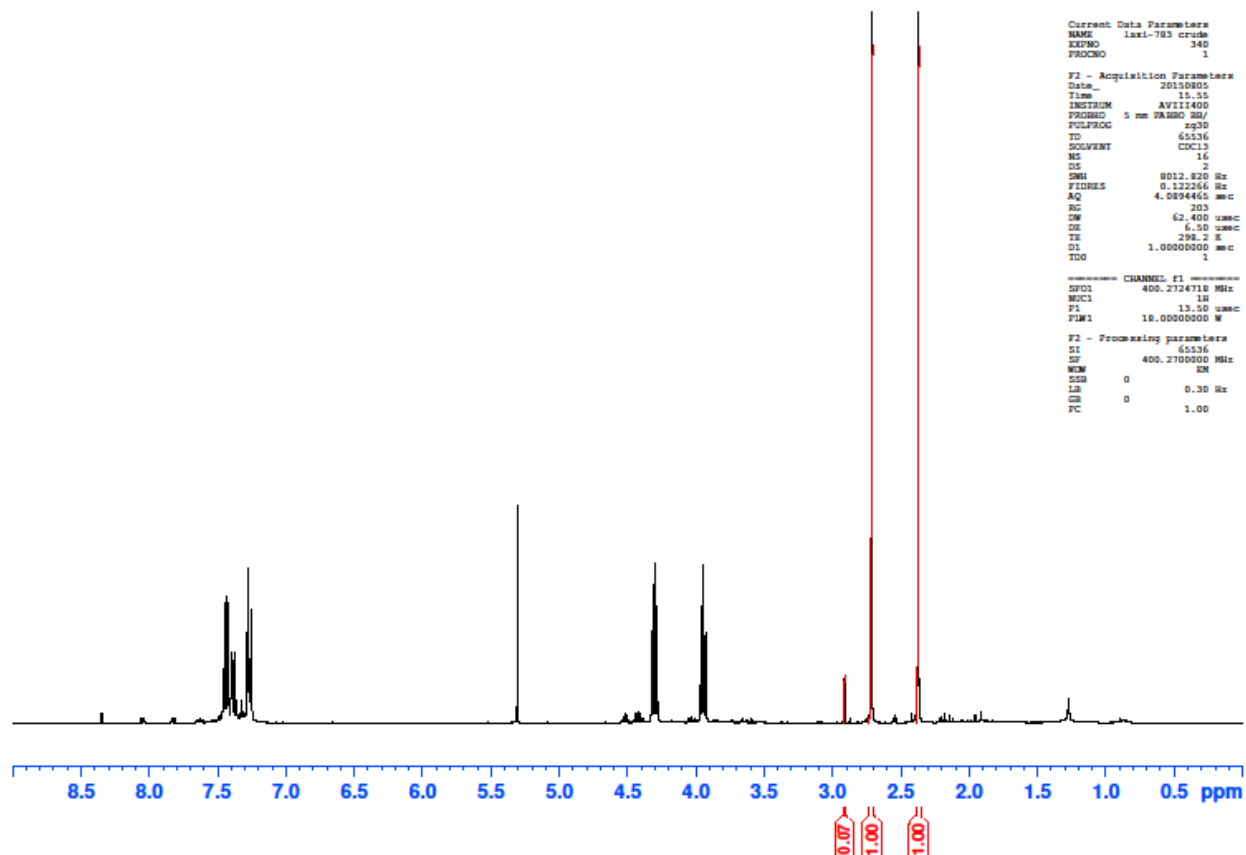

Supplementary Figure 63. Orthogonality in the synthesis of heterocycles (using 5.0 eq. of MeCN).

**2,4-bis(4-bromophenyl)-5-heptyl-6-(methylthio)pyrimidine.**

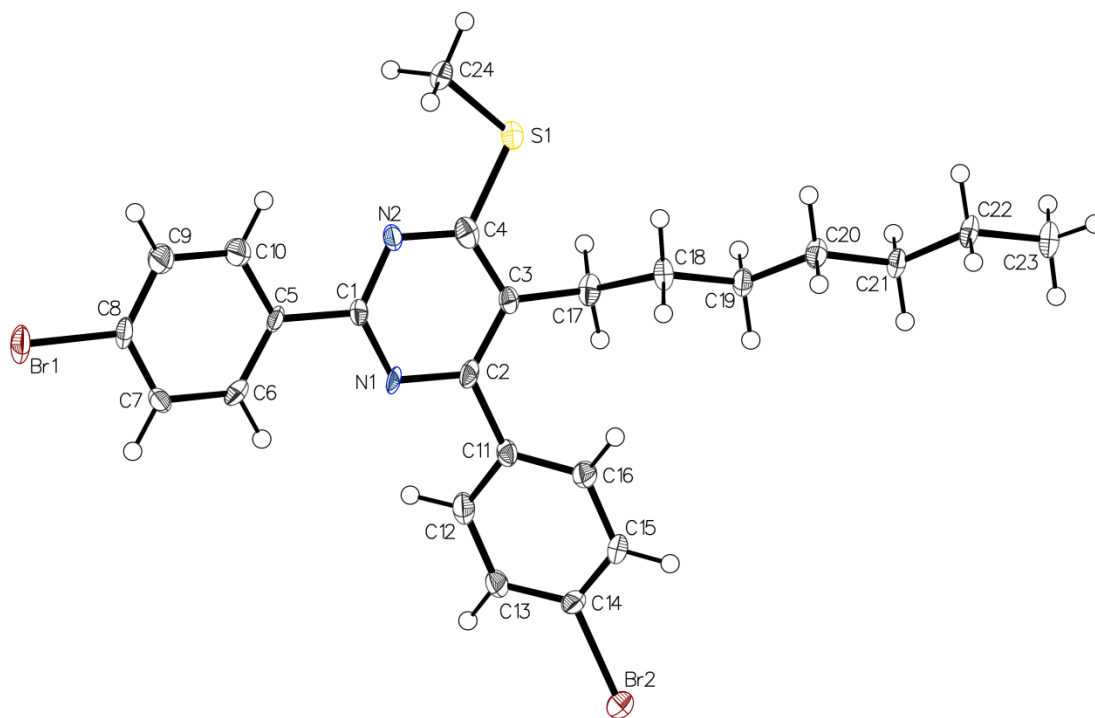

**Supplementary Figure 64.** Asymmetric Unit of [Iaxi607], drawn with 50% displacement ellipsoids.



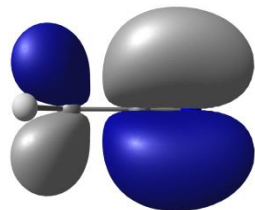

Acetonitrile HOMO

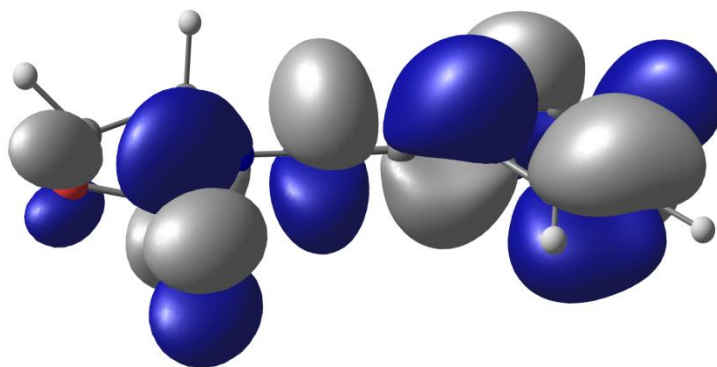

Oxazolidinone derivative LUMO

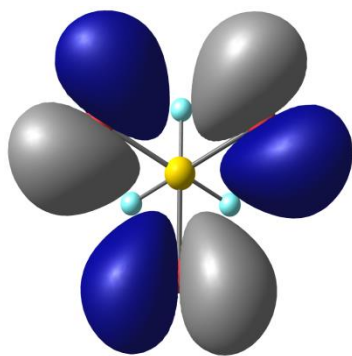

TfO<sup>-</sup> HOMO

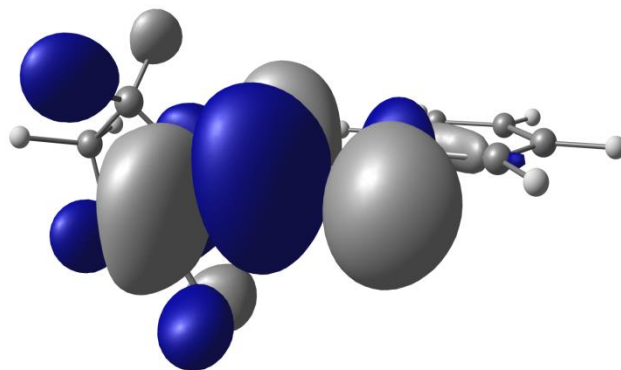

Protonated oxazolidinone derivative LUMO

**Supplementary Figure 65.** HOMO and LUMO orbital shapes for acetonitrile, TfO<sup>-</sup> anion, and neutral and protonated oxazolidinone derivatives.

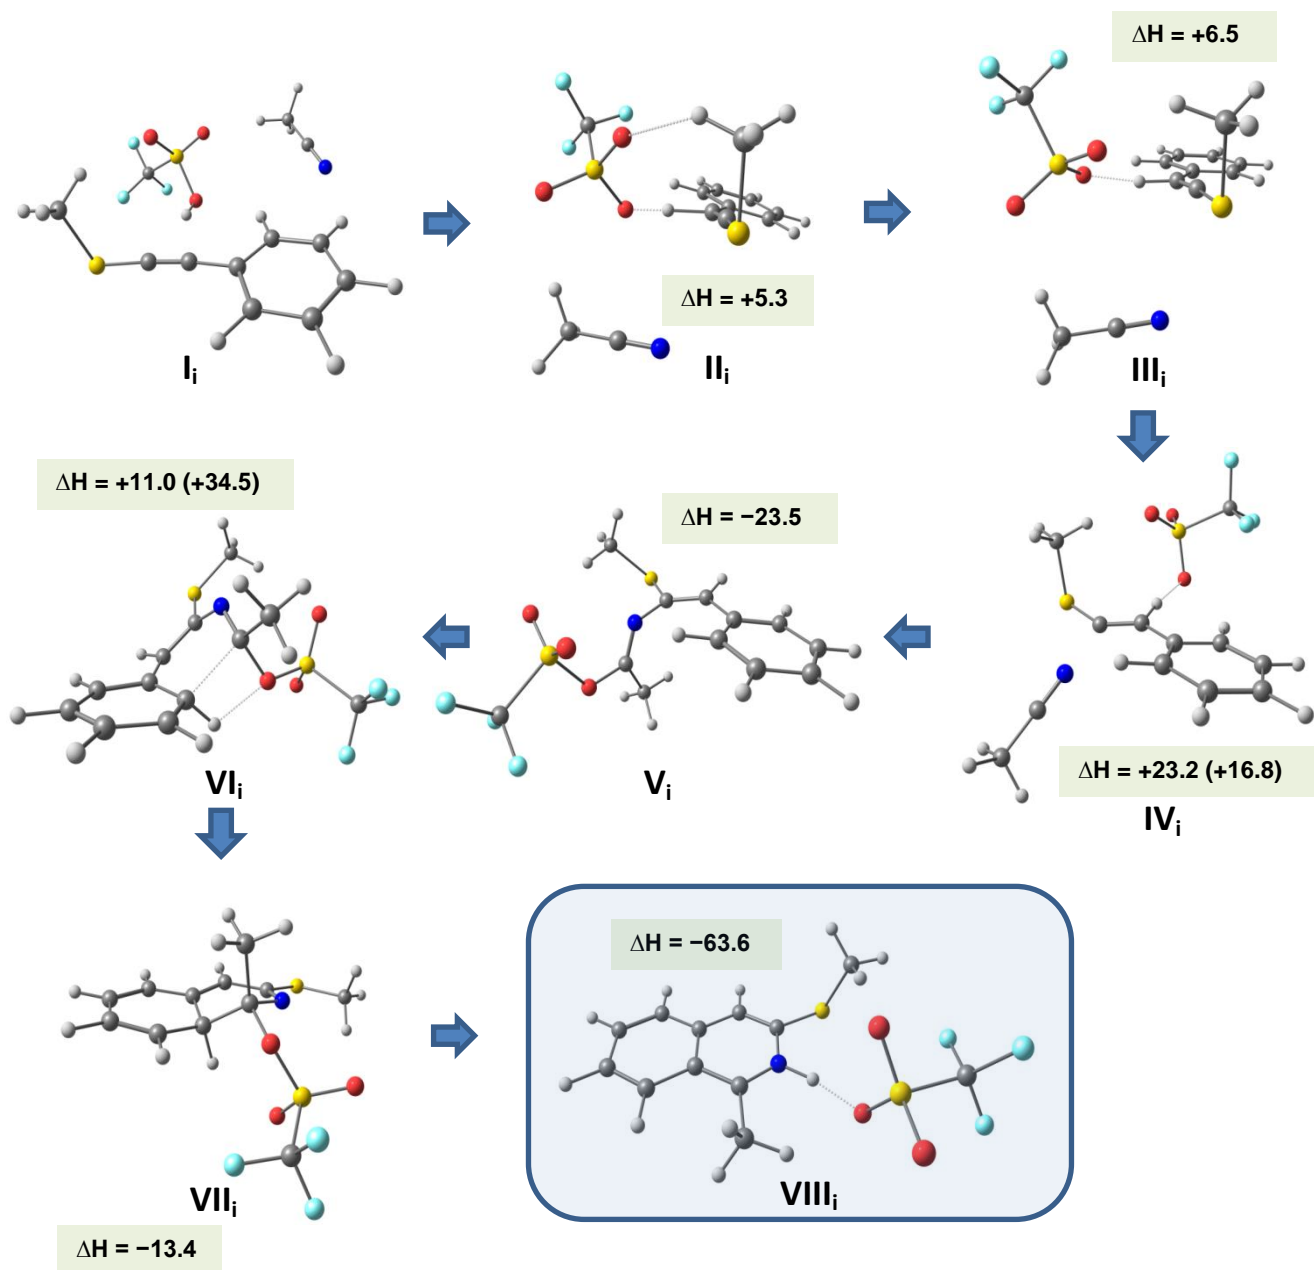

**Supplementary Figure 66.** Proposed mechanism for the isoquinoline scaffold formation in the case of the methylthio derivative. Values, in  $\text{Kcal mol}^{-1}$ , are always referred to the starting materials (preassociation complex). In parenthesis, for transition states, the relative values with respect to the intermediate from which they are formed.

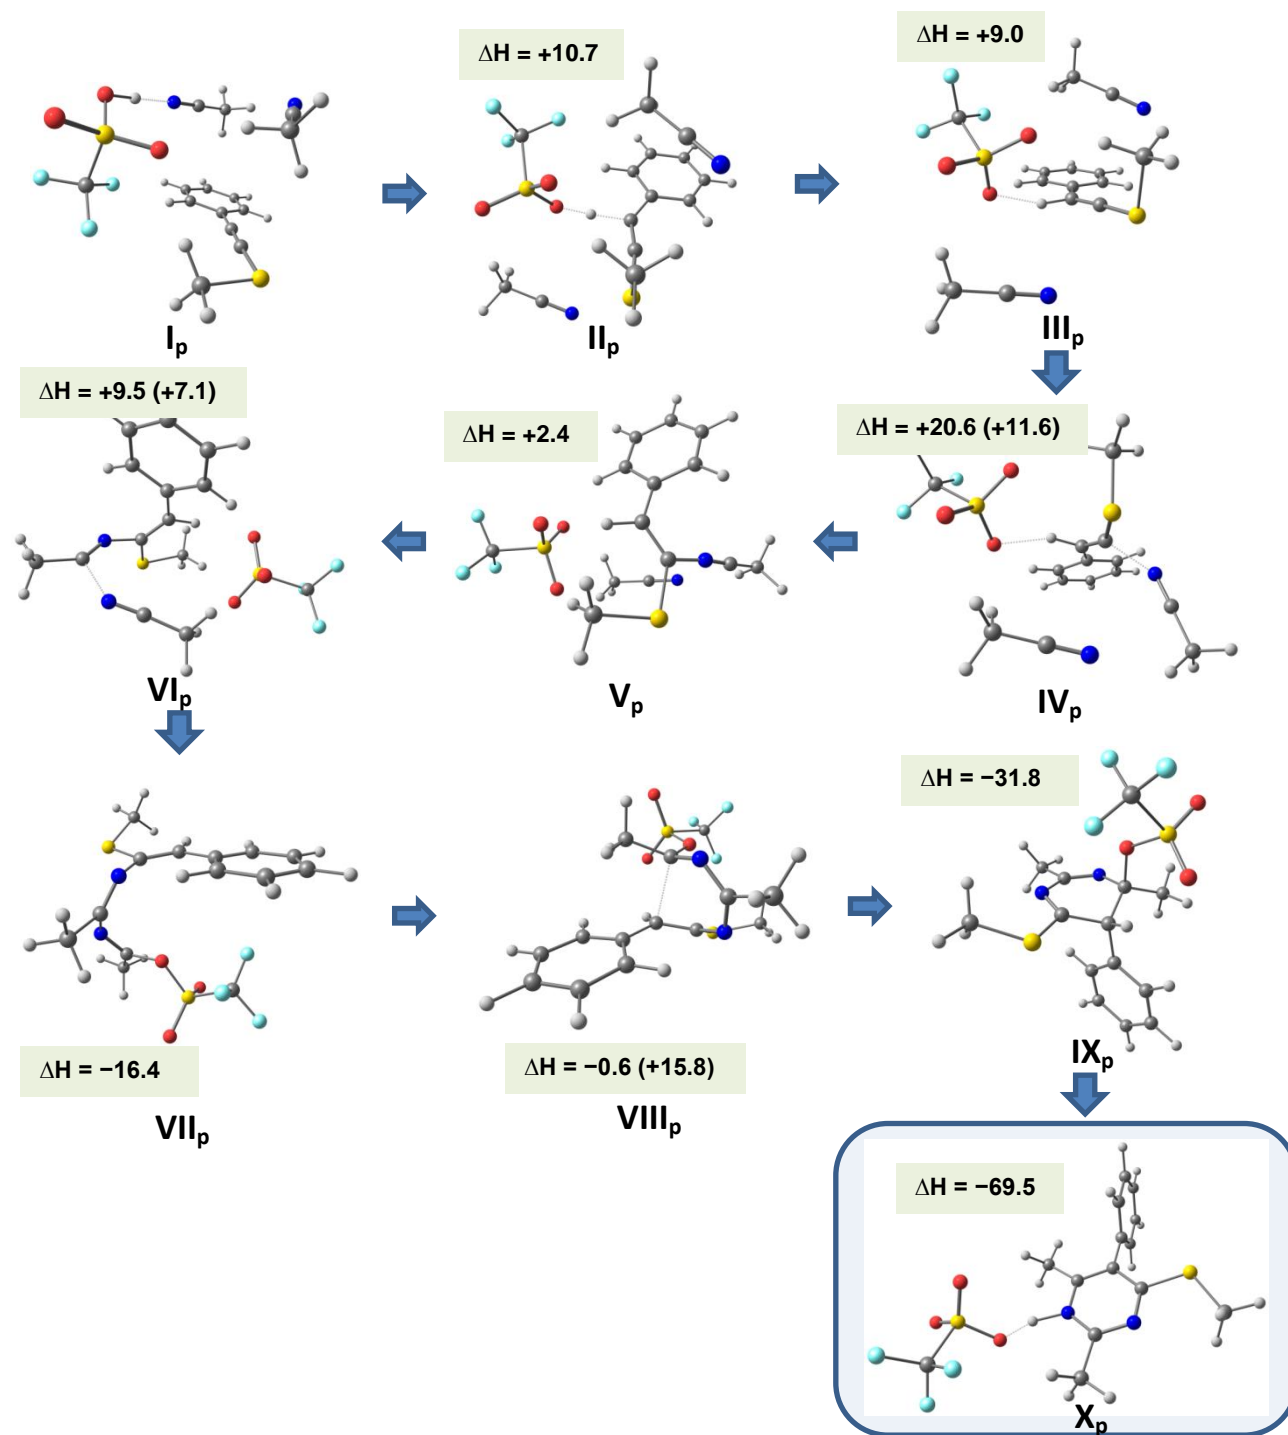

**Supplementary Figure 67.** Proposed mechanism for the pyrimidine scaffold formation in the case of the methylthio derivative. Values, in Kcal mol<sup>-1</sup>, are always referred to the starting materials (preassociation complex). In parenthesis, for transition states, the relative values with respect to the intermediate from which they are formed.

**Supplementary Table 1.** Optimization of the synthesis of isoquinoline 3aa.<sup>[a]</sup>

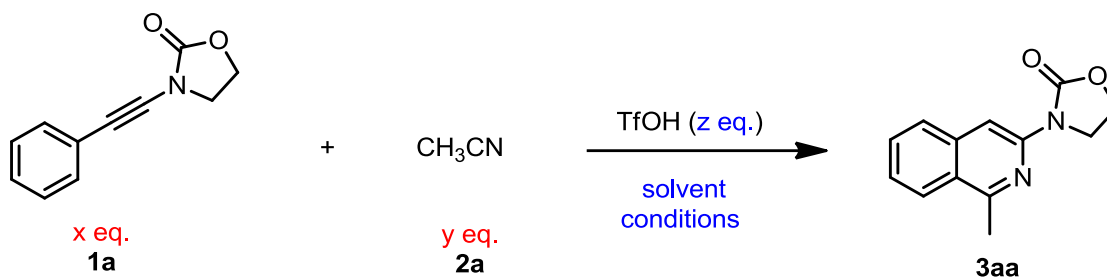

| Entry     | x          | y          | z          | Solvent             | Conditions         | Yield <sup>[b]</sup>     |
|-----------|------------|------------|------------|---------------------|--------------------|--------------------------|
| 1         | 1.0        | 5.0        | 1.0        | DCM (0.4 M)         | rt, 24 h           | 13%                      |
| 2         | 1.0        | 5.0        | 1.0        | DCE (0.4 M)         | 85 °C, 16 h        | 26%                      |
| 3         | 1.0        | 2.0        | 1.0        | DCE (0.4 M)         | 80 °C, 16 h        | 42%                      |
| 4         | 1.0        | 2.0        | 1.0        | neat                | 80 °C, 16 h        | 10%                      |
| 5         | 1.1        | 1.0        | 1.1        | DCE (0.4 M)         | 80 °C, 16 h        | 50%                      |
| 6         | 1.1        | 1.0        | 1.1        | DCE (0.1 M)         | 110 °C, 16 h       | 78%                      |
| 7         | 1.1        | 1.0        | 0.2        | DCE (0.1 M)         | 110 °C, 16 h       | 12%                      |
| 8         | 1.1        | 1.0        | 1.1        | DCE (0.05 M)        | 110 °C, 16 h       | 85%                      |
| 9         | 1.1        | 1.0        | 1.1        | DCE (0.05 M)        | 110 °C, 16 h       | 60% <sup>[c]</sup>       |
| <b>10</b> | <b>1.1</b> | <b>1.0</b> | <b>1.1</b> | <b>DCE (0.05 M)</b> | <b>120 °C, 1 h</b> | <b>89%<sup>[d]</sup></b> |

[a] All reactions were conducted in 0.2 mmol scale. [b] Yield of isolated product. [c] HNTf<sub>2</sub> was used instead of TfOH. [d] Microwave irradiation for 1 h. DCM = dichloromethane, DCE = 1, 2-dichloroethane.

**Supplementary Table 2.** Optimization of the synthesis of pyrimidine **5aa**.<sup>[a]</sup>

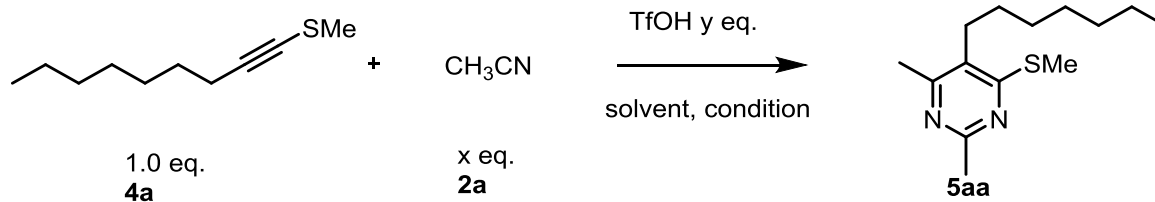

| Entry | X   | Y   | Solvent                    | condition    | Yield (%) <sup>[b]</sup> |
|-------|-----|-----|----------------------------|--------------|--------------------------|
| 1     | 2.1 | 1.0 | DCE, 0.05 M                | 110 °C, 12 h | 36                       |
| 2     | 2.1 | 1.0 | DCE, 0.05 M                | 50 °C, 24 h  | 36                       |
| 3     | 2.1 | 1.0 | DCM, 0.05 M                | rt, 24 h     | 46                       |
| 4     | -   | 1.0 | CH <sub>3</sub> CN, 0.05 M | rt, 24 h     | 67                       |
| 5     | -   | 0.2 | CH <sub>3</sub> CN, 0.05 M | rt, 24 h     | 10                       |
| 6     | -   | 1.0 | CH <sub>3</sub> CN, 0.1 M  | 80 °C, 16 h  | 73                       |
| 7     | -   | 1.0 | CH <sub>3</sub> CN, 0.1 M  | rt, 16 h     | 73                       |
| 8     | 5.0 | 1.0 | DCM, 0.1 M                 | rt, 16 h     | 71                       |

[a] All reactions were conducted in 0.2 mmol scale. [b] Yield of isolated product. DCM = dichloromethane, DCE = 1, 2-dichloroethane.

**Supplementary Table 3.** Experimental parameter and CCDC-Code.

| Sample  | Machine | Source | Temp.   | Detector Distance | Time/Frame | #Frames | Frame width | CCDC    |
|---------|---------|--------|---------|-------------------|------------|---------|-------------|---------|
|         | Bruker  |        | [K]     | [mm]              | [s]        |         | [°]         |         |
| Laxi607 | D8      | Mo     | 100 (2) | 35                | 20         | 3528    | 0.4         | 1423496 |

**Supplementary Table 4.** Sample and crystal data of [laxi607].

|                                                |                                                                  |                                                 |                         |    |
|------------------------------------------------|------------------------------------------------------------------|-------------------------------------------------|-------------------------|----|
| <b>Chemical formula</b>                        | C <sub>24</sub> H <sub>26</sub> Br <sub>2</sub> N <sub>2</sub> S | <b>Crystal system</b>                           | orthorhombic            |    |
| <b>Formula weight [g/mol]</b>                  | 534.35                                                           | <b>Space group</b>                              | <i>Pna2<sub>1</sub></i> |    |
| <b>Temperature [K]</b>                         | 100                                                              | <b>Z</b>                                        | 4                       |    |
| <b>Measurement method</b>                      | \Φ and \ω scans                                                  | <b>Volume [Å<sup>3</sup>]</b>                   | 2276.7(5)               |    |
| <b>Radiation (Wavelength [Å])</b>              | MoKα (λ = 0.71073)                                               | <b>Unit cell dimensions and [°]</b>             | 20.254(3)               | 90 |
| <b>Crystal size [mm<sup>3</sup>]</b>           | 0.536 × 0.114 × 0.058                                            |                                                 | 24.972(3)               | 90 |
| <b>Crystal habit</b>                           | clear colorless block                                            |                                                 | 4.5015(6)               | 90 |
| <b>Density (calculated) [g/cm<sup>3</sup>]</b> | 1.559                                                            | <b>Absorption coefficient [mm<sup>-1</sup>]</b> | 3.666                   |    |
| <b>Abs. correction Tmin</b>                    | 0.5168                                                           | <b>Abs. correction Tmax</b>                     | 0.746                   |    |
| <b>Abs. correction type</b>                    | multi-scan                                                       | <b>F(000) [e<sup>-</sup>]</b>                   | 1080                    |    |

**Supplementary Table 5.** Data collection and structure refinement of [laxi607].

|                                                       |                                        |                                            |                                             |                           |
|-------------------------------------------------------|----------------------------------------|--------------------------------------------|---------------------------------------------|---------------------------|
| <b>Index ranges</b>                                   | -24 ≤ h ≤ 24, -30 ≤ k ≤ 30, -4 ≤ l ≤ 5 | <b>Theta range for data collection [°]</b> | 3.832 to 50.696                             |                           |
| <b>Reflections number</b>                             | 22002                                  | <b>Data / restraints / parameters</b>      | 3953/1/264                                  |                           |
| <b>Refinement method</b>                              | Least squares                          | <b>Final R indices</b>                     | all data                                    | R1 = 0.0487, wR2 = 0.0769 |
| <b>Function minimized</b>                             | $\sum w(F_o^2 - F_c^2)^2$              |                                            | l > 2σ(l)                                   | R1 = 0.0362, wR2 = 0.0734 |
| <b>Goodness-of-fit on F<sup>2</sup></b>               | 1.024                                  | <b>Weighting scheme</b>                    | $w=1/[\sigma^2(F_o^2)+(0.0391P)^2+0.8315P]$ |                           |
| <b>Largest diff. peak and hole [e Å<sup>-3</sup>]</b> | 0.47/-0.41                             |                                            | where $P=(F_o^2+2F_c^2)/3$                  |                           |

## Supplementary method

### General information

All reactions were carried out in flame-dried glassware under an atmosphere of argon. All solvents were distilled from appropriate drying agents prior to use. All reagents were used as received from commercial suppliers unless otherwise stated. Neat infra-red spectra were recorded using a Perkin-Elmer Spectrum 100 FT-IR spectrometer. Wavelengths ( $\nu$ ) are reported in  $\text{cm}^{-1}$ . Mass spectra were obtained using a Finnigan MAT 8200 (70 eV) or an Agilent 5973 (70 eV) spectrometer, using electrospray ionization (ESI). Accurate mass determinations were obtained on a Bruker APEX III FT-MS (7 T magnet). All  $^1\text{H-NMR}$  and  $^{13}\text{C-NMR}$  experiments were recorded using Bruker AV-400 spectrometers. Chemical shifts ( $\delta$ ) are quoted in ppm and coupling constants ( $J$ ) are quoted in Hz. Reaction progress was monitored by thin layer chromatography (TLC) performed on aluminum plates coated with kieselgel F254 with 0.2 mm thickness. Visualization was achieved by a combination of ultraviolet light (254 nm) and potassium permanganate. Flash column chromatography was performed using silica gel 60 (230-400 mesh, Merck and co.).

### General procedure for the synthesis of starting materials

#### General procedure A:

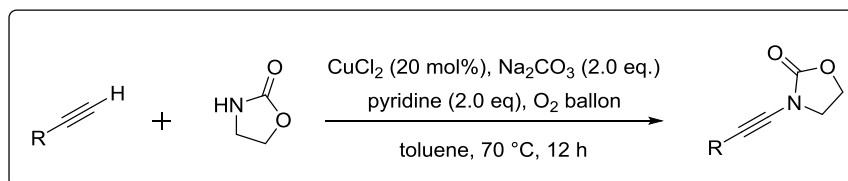

To a flask were added CuCl<sub>2</sub> (20 mol%), 2-oxazolidone or sulfonamide (5.0 eq.) and Na<sub>2</sub>CO<sub>3</sub> (2.0 eq.). The reaction flask was purged with oxygen for 15 min. A solution of pyridine (2.0 eq.) in dry toluene (0.2 M) was added. A balloon filled with oxygen was connected to the flask and the flask was heated at 70 °C. After 15 min, a solution of alkyne (1.0 eq.) in dry toluene (0.2 M) was added over 4 h using syringe pump. After this addition, the mixture was allowed to stir at 70 °C for another 12 h and was then cooled to rt. The reaction mixture was concentrated under reduced pressure and the residue was purified by flash chromatography on silica gel with hexane/ethyl acetate.

### General procedure B:

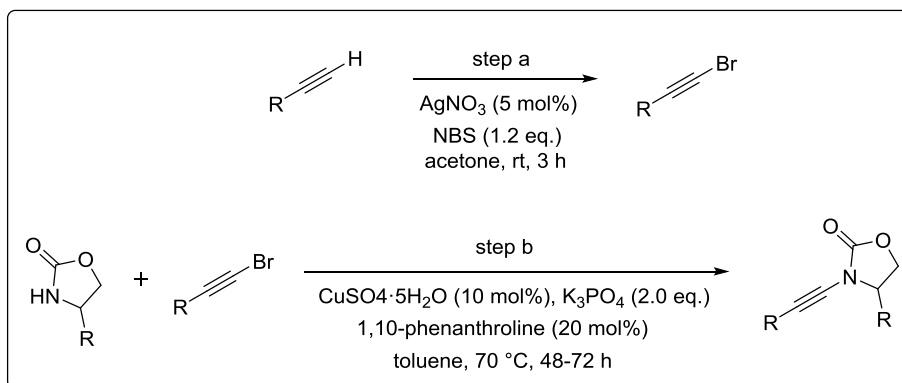

*Step a, synthesis of alkyne bromide:* A solution of alkyne (1.0 eq.), *N*-bromosuccinimide (1.2 eq.), and silver nitrate (5 mol%) in acetone (0.3 M) was stirred at room temperature for 3 h. Acetone was then removed on a rotary evaporator. The resulting product was dissolved in pentane, and the solution was passed through a short silica gel column. The reaction mixture was then concentrated under reduced pressure giving alkyne bromide as a light yellow liquid.

*Step b, cross coupling of oxazolidinone with alkyne bromide:* Alkyne bromide (1.0 eq.) obtained from step a, oxazolidinone (1.2 eq.),  $K_3PO_4$  (2.0 eq.),  $CuSO_4 \cdot 5H_2O$  (10 mol%), 1,10-phenanthroline (20 mol%) in toluene (0.5 M) was heated at  $80^\circ C$  for 48 h. After cooling to room temperature, the reaction mixture was concentrated under reduced pressure and the residue was purified by flash chromatography on silica gel.

### General procedure C:

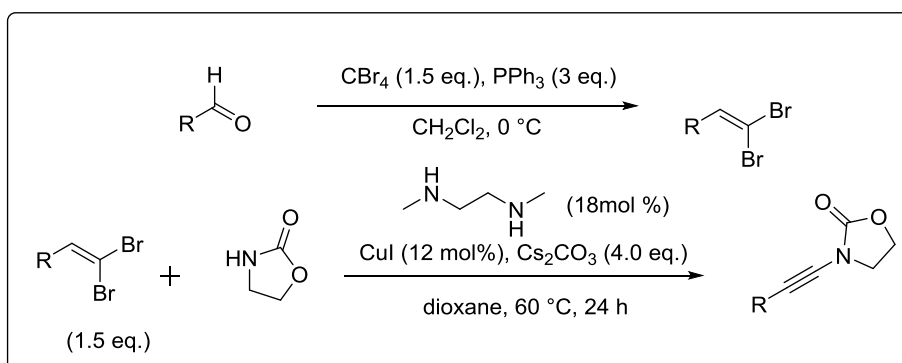

*Step a, synthesis of 1,1-dibromoalkene:* A round-bottomed flask was charged with aldehydes (10 mmol),  $CBr_4$  (15 mmol) and  $CH_2Cl_2$  (80 mL). Then the flask was placed in an ice-water bath. A solution of  $PPh_3$  (30



mmol) in  $\text{CH}_2\text{Cl}_2$  (70 mL) was added through dropping funnel in 15 min. TLC analysis was performed until the spot of carbonyl compound disappeared. In general, the reaction finished in 15 minutes and white precipitate formed. Then petroleum ether (100 mL) was added and more precipitate would form. The precipitate was filtrated off, and washed with petroleum ether or ethyl ether. After solvent evaporated off in vacuum, the product was isolated by silicagel chromatography.

*Step b, cross coupling of oxazolidinone:* A 15 mL pressure tube was charged with oxazolidinone (1.6 mmol), 1,1-dibromo-1-alkene (2.4 mmol),  $\text{Cs}_2\text{CO}_3$  (2.1 g, 6.4 mmol), and copper(I) iodide (38 mg, 0.2 mmol). The tube was fitted with a rubber septum, evacuated under high vacuum and backfilled with argon. Dry and degassed 1,4-dioxane or DMF (3 mL) and *N,N'*-dimethylethylenediamine (30  $\mu\text{L}$ , 0.3 mmol) were next added, the rubber septa was replaced by Teflon-coated screw cap and the light blue-green suspension was heated at the temperature. The brownish suspension was cooled to rt. When the reaction was run in 1,4-dioxane, the crude reaction mixture was filtered over a plug of silica gel (washed with EtOAc), and concentrated. When the reaction was run in DMF, the crude reaction mixture was diluted with water, extracted with diethyl ether and the combined organic layers were washed with brine, dried over  $\text{MgSO}_4$ , filtered and concentrated. The crude residue was in both cases purified by flash chromatography over silica gel.

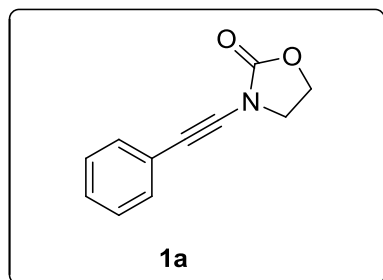

### **3-(phenylethynyl)oxazolidin-2-one (1a)**

**General procedure B** was performed with phenyl acetylene (1.13 g, 10 mmol) and 2-oxazolidone (1.05 g, 12 mmol). Purification by flash column chromatography (hexane/ethyl acetate = 1/1) afforded the title compound (1.5 g, 83%) as white solid.

IR (neat)  $\nu_{\text{max}}$ : 2986, 2918, 2259, 1760, 1701, 1477, 1420, 1198, 1164, 1083, 1032, 970, 748, 693, 625;

$^1\text{H-NMR}$  (400 MHz,  $\text{CDCl}_3$ ):  $\delta$  7.46-7.42 (m, 2H), 7.32-7.28 (m, 3H), 4.50-4.46 (m, 2H), 4.02-3.98 (m, 2H);

$^{13}\text{C}$ -NMR (100 MHz,  $\text{CDCl}_3$ ):  $\delta$  156.0, 131.7 (2C), 128.4 (2C), 128.3, 122.3, 79.1, 71.3, 63.2, 47.2;

HRMS (ESI+): exact mass calculated for  $[\text{M}+\text{Na}]^+$  ( $\text{C}_{11}\text{H}_9\text{NaNO}_2$ ) requires  $m/z$  210.0633, found  $m/z$  210.0518.

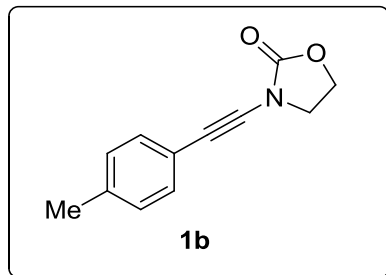

### 3-(p-tolylethynyl)oxazolidin-2-one (1b)

**General procedure B** was performed with 4-dimethylphenyl acetylene (1.16 mg, 10 mmol) and 2-oxazolidone (1.04 g, 12 mmol). Purification by flash column chromatography (hexane/ethyl acetate = 1/1) afforded the title compound (1.5 g, 75%) as white solid.

IR (neat)  $\nu_{\text{max}}$ : 2986, 2915, 2260, 1756, 1604, 1476, 1415, 1339, 1215, 1164, 1090, 1030, 970, 840, 746, 706;

$^1\text{H}$ -NMR (400 MHz,  $\text{CDCl}_3$ ):  $\delta$  7.33 (d,  $J$  = 8.0, 0.9 Hz, 2H), 7.11 (d,  $J$  = 8.0 Hz, 2H), 4.49-4.45 (m, 2H), 4.01-3.97 (m, 2H), 2.34 (s, 3H);

$^{13}\text{C}$ -NMR (100 MHz,  $\text{CDCl}_3$ ):  $\delta$  156.1, 138.5, 131.8 (2C), 129.2 (2C), 119.2, 78.4, 71.4, 63.1, 47.2, 21.5;

HRMS (ESI+): exact mass calculated for  $[\text{M}+\text{Na}]^+$  ( $\text{C}_{12}\text{H}_{11}\text{NaNO}_2$ ) requires  $m/z$  224.0790, found  $m/z$  224.0673.

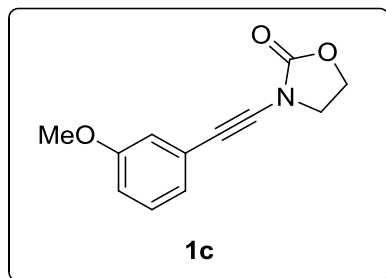

### 3-(3-methoxyphenyl)ethynyl)oxazolidin-2-one (1c)

**General procedure B** was performed with 3',4'-dimethoxyphenyl acetylene (500 mg, 3.8mmol) and 2-oxazolidone (394 mg, 4.4 mmol). Purification by flash column chromatography (hexane/ethyl acetate = 1/1) afforded the title compound (500 mg, 61%) as white solid.

IR (neat)  $\nu_{\max}$ : 2920, 2255, 1761, 1600, 1576, 1477, 1453, 1428, 1407, 1249, 1201, 1144, 1091, 1036, 972, 783, 748, 712, 688, 628;

$^1\text{H-NMR}$  (400 MHz,  $\text{CDCl}_3$ ):  $\delta$  7.21 (t,  $J = 7.9$ , 1H), 7.03 (dt,  $J = 7.6$ , 1.3 Hz, 1H), 6.97 (dd,  $J = 2.6$ , 1.3 Hz, 1H), 6.86 (ddd,  $J = 8.3$ , 2.6, 0.95 Hz, 1H), 4.51-4.47 (m, 2H), 4.03-3.99 (m, 2H), 3.80 (s, 3H);

$^{13}\text{C-NMR}$  (100 MHz,  $\text{CDCl}_3$ ):  $\delta$  159.5, 156.0, 129.5, 124.2, 123.4, 116.4, 115.0, 78.9, 71.4, 63.2, 55.5, 47.2;

HRMS (ESI+): exact mass calculated for  $[\text{M}+\text{Na}]^+$  ( $\text{C}_{12}\text{H}_{11}\text{NaNO}_3$ ) requires  $m/z$  240.0739, found  $m/z$  240.0624.

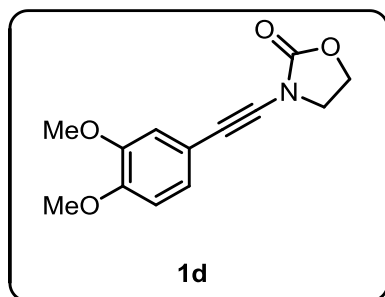

### 3-((3,4-dimethoxyphenyl)ethynyl)oxazolidin-2-one (1d)

**General procedure A** was performed with 3',4'-dimethoxyphenyl acetylene (162 mg, 1 mmol) and 2-oxazolidone (435 mg, 5 mmol). Purification by flash column chromatography (hexane/ethyl acetate = 1/1) afforded the title compound (175 mg, 59%) as white solid.

IR (neat)  $\nu_{\max}$ : 2934, 2255, 1768, 1516, 1423, 1401, 1235, 1137, 1024, 749;

$^1\text{H-NMR}$  (400 MHz,  $\text{CDCl}_3$ ):  $\delta$  7.05 (dd,  $J = 8.3$ , 1.9 Hz, 1H), 6.96 (d,  $J = 1.8$  Hz, 1H), 6.80 (d,  $J = 8.4$  Hz, 1H), 4.46-4.50 (m, 2H), 4.02-3.98 (m, 2H), 3.88 (s, 3H), 3.87 (s, 3H);

$^{13}\text{C-NMR}$  (100 MHz,  $\text{CDCl}_3$ ):  $\delta$  156.1, 149.7, 148.8, 125.4, 114.9, 114.4, 111.1, 77.6, 71.3, 63.1, 56.1, 56.0, 47.3;

HRMS (ESI+): exact mass calculated for  $[M+Na]^+$  ( $C_{13}H_{13}NaNO_4$ ) requires  $m/z$  270.0742, found  $m/z$  270.0743.

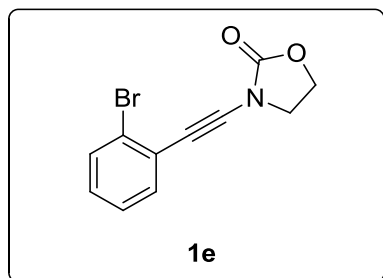

### 3-((2-bromophenyl)ethynyl)oxazolidin-2-one (**1e**)

**General procedure C** was performed with 2-dimethoxyphenyl acetylene (1 g, 8 mmol) and 2-oxazolidone (1.05 g, 20 mmol). Purification by flash column chromatography (hexane/ethyl acetate = 1/1) afforded the title compound (570 mg, 57%) as white solid.

IR (neat)  $\nu_{\max}$ : 2921, 2852, 2257, 1758, 1634, 1478, 1408, 1252, 1198, 1119, 1088, 1028, 971, 749, 624;

$^1\text{H-NMR}$  (400 MHz,  $\text{CDCl}_3$ ):  $\delta$  7.53 (dd,  $J = 8.1, 0.95$  Hz, 1H), 7.42 (dd,  $J = 7.8, 1.7$  Hz, 1H), 7.21 (td,  $J = 7.6, 1.2$  Hz, 1H), 7.11 (td,  $J = 7.8, 1.7$  Hz, 1H), 4.47-4.43 (m, 2H), 4.01-3.97 (m, 2H);

$^{13}\text{C-NMR}$  (100 MHz,  $\text{CDCl}_3$ ):  $\delta$  155.6, 132.9, 132.3, 129.2, 127.0, 124.9, 124.5, 83.5, 70.2, 63.3, 46.9;

HRMS (ESI+): exact mass calculated for  $[M+Na]^+$  ( $C_{11}H_8BrNaNO_2$ ) requires  $m/z$  287.9738, found  $m/z$  287.9640.

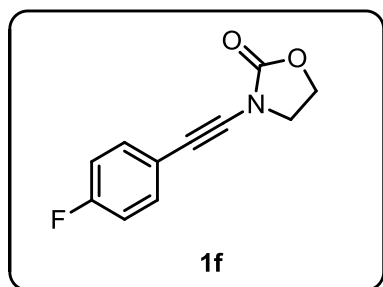

### 3-((4-fluorophenyl)ethynyl)oxazolidin-2-one (**1f**)

**General procedure A** was performed with 1-Ethynyl-4-fluorobenzene (240 mg, 2 mmol) and 2-oxazolidone (871 mg, 10 mmol). Purification by flash column chromatography (DCM to DCM/Methanol = 100/1) afforded the title compound (244 mg, 59%) as white solid.

IR (neat)  $\nu_{\text{max}}$ : 2910, 2267, 1754, 1469, 1423, 1216, 1165, 1090, 834;

$^1\text{H-NMR}$  (400 MHz,  $\text{CDCl}_3$ ):  $\delta$  7.44-7.41 (m, 2H), 7.03-6.98 (m, 2H), 4.51-4.47 (m, 2H), 4.02-3.98 (m, 2H);

$^{13}\text{C-NMR}$  (100 MHz,  $\text{CDCl}_3$ ):  $\delta$  162.7 (d,  $J_{\text{F-C}} = 249$  Hz), 156.0, 133.8 (d,  $J_{\text{F-C}} = 8.1$  Hz, 2C), 118.4 (d,  $J_{\text{F-C}} = 3.7$  Hz), 115.8 (d,  $J_{\text{F-C}} = 22$  Hz, 2C), 78.7, 70.3, 63.2, 47.2;

HRMS (ESI+): exact mass calculated for  $[\text{M}+\text{Na}]^+$  ( $\text{C}_{11}\text{H}_8\text{FNaNO}_2$ ) requires  $m/z$  228.0437, found  $m/z$  228.0424.

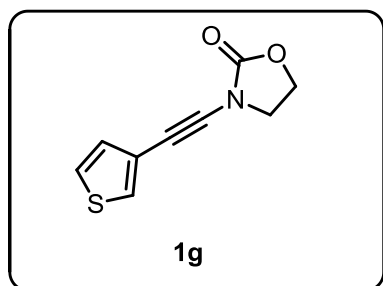

### 3-(thiophen-2-ylethynyl)oxazolidin-2-one (**1g**)

**General procedure A** was performed with 3-Ethynylthiophene (216 mg, 2 mmol) and 2-oxazolidone (871 mg, 10 mmol). Purification by flash column chromatography (DCM to DCM/Methanol =100/1) afforded the title compound (236 mg, 61%) as white solid.

IR (neat)  $\nu_{\text{max}}$ : 3107, 2919, 2256, 1775, 1477, 1436, 1198, 1085, 973, 784;

$^1\text{H-NMR}$  (400 MHz,  $\text{CDCl}_3$ ):  $\delta$  7.46 (s, 1H), 7.26 (m, 1H), 7.11 (d,  $J = 4.9$  Hz, 1H), 4.48 (m, 2H), 3.99 (m, 2H);

$^{13}\text{C-NMR}$  (100 MHz,  $\text{CDCl}_3$ ):  $\delta$  156.0, 130.2, 129.3, 125.4, 121.1, 78.5, 66.5, 63.2, 47.2;

HRMS (ESI+): exact mass calculated for  $[\text{M}+\text{Na}]^+$  ( $\text{C}_9\text{H}_7\text{NaNO}_2\text{S}$ ) requires  $m/z$  216.0095, found  $m/z$  216.0091.

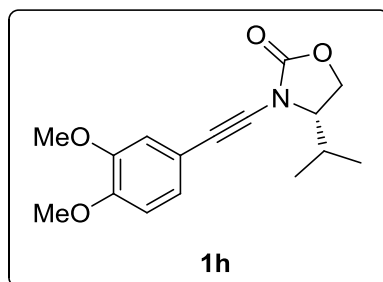

### (S)-3-((3,4-dimethoxyphenyl)ethynyl)-4-isopropylloxazolidin-2-one (1h)

**General procedure B** was performed with 3',4'-dimethoxyphenyl acetylene (162 mg, 1 mmol) and (S)-4-isopropyl 2-oxazolidone (155 mg, 1.2 mmol). Purification by flash column chromatography (hexane/ethyl acetate = 1/1) afforded the title compound (100 mg, 35%) as white solid.

IR (neat)  $\nu_{\max}$ : 2961, 2838, 2252, 1770, 1596, 1489, 1463, 1421, 1320, 1262, 1237, 1198, 1137, 1087, 1023, 854, 810, 764, 617;

$^1\text{H-NMR}$  (400 MHz,  $\text{CDCl}_3$ ):  $\delta$  7.04 (dd,  $J = 8.3, 1.9$  Hz, 1H), 6.95 (d,  $J = 1.9$  Hz, 2H), 6.79 (d,  $J = 8.3$  Hz, 1H), 4.41 (t,  $J = 8.3$  Hz, 1H), 4.21-4.17 (m, 1H), 4.05-4.01 (m, 1H), 3.88 (s, 3H), 3.87 (s, 3H), 1.04-1.01 (m, 6H);

$^{13}\text{C-NMR}$  (100 MHz,  $\text{CDCl}_3$ ):  $\delta$  156.2, 149.7, 148.8, 125.3, 114.8, 114.6, 111.1, 77.07, 72.3, 64.9, 62.3, 56.1, 56.0, 29.4, 17.4, 15.4;

HRMS (ESI+): exact mass calculated for  $[\text{M}+\text{Na}]^+$  ( $\text{C}_{16}\text{H}_{19}\text{NaNO}_4$ ) requires  $m/z$  312.1314, found  $m/z$  312.1210.

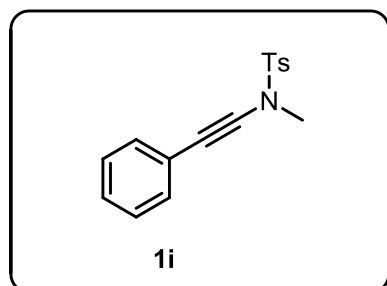

### N,4-dimethyl-N-(phenylethynyl)benzenesulfonamide (1i)

**General procedure A** was performed with phenyl acetylene (204 mg, 2 mmol) and N-methyl-p-toluenesulfonamide (1.85 g, 10 mmol). Purification by flash column chromatography (DCM to DCM/Methanol =100/1) afforded the title compound (348 mg, 61%) as white solid.

IR (neat)  $\nu_{\max}$ : 3059, 2929, 2234, 1597, 1365, 1158, 1089, 964, 755;

$^1\text{H-NMR}$  (400 MHz,  $\text{CDCl}_3$ ):  $\delta$  7.84 (d,  $J = 8.3$  Hz, 2H), 7.38-7.35 (m, 4H), 7.30-7.28 (m, 3H), 3.16 (s, 3H), 2.46 (s, 3H);

$^{13}\text{C-NMR}$  (100 MHz,  $\text{CDCl}_3$ ):  $\delta$  144.9, 133.5 (2C), 131.6 (2C), 130.0 (2C), 128.4 (2C), 128.0, 128.0, 122.9, 84.1, 69.2, 39.5, 21.8;

HRMS (ESI+): exact mass calculated for  $[M+Na]^+$  ( $C_{16}H_{15}NaNO_2S$ ) requires  $m/z$  308.0721, found  $m/z$  308.0712.

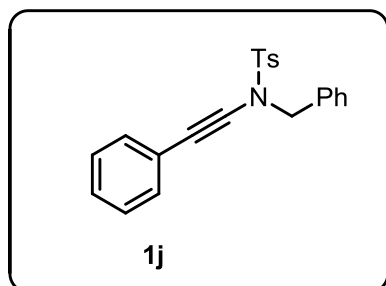

### N,4-dimethyl-N-(phenylethynyl)benzenesulfonamide (1j)

**General procedure A** was performed with phenyl acetylene (306 mg, 3 mmol) and N-benzyl-p-toluenesulfonamide (3.92 g, 15 mmol). Purification by flash column chromatography (DCM to DCM/Methanol =100/1) afforded the title compound (629 mg, 58%) as white solid.

IR (neat)  $\nu_{max}$ : 3032, 1699, 1597, 1453, 1352, 1164, 1087, 697;

$^1H$ -NMR (400 MHz,  $CDCl_3$ ):  $\delta$  7.80 (d,  $J = 8.3$  Hz, 2H), 7.34-7.30 (m, 7H), 7.24 (s, 5H), 4.59 (s, 2H), 2.45 (s, 3H);

$^{13}C$ -NMR (100 MHz,  $CDCl_3$ ):  $\delta$  144.8, 134.9, 134.6, 131.3, 129.9, 129.0, 128.7, 128.5, 128.3, 127.9, 127.8, 123.0, 82.9, 71.6, 55.9, 21.8;

HRMS (ESI+): exact mass calculated for  $[M+Na]^+$  ( $C_{22}H_{19}NaNO_2S$ ) requires  $m/z$  384.1034, found  $m/z$  384.1030.

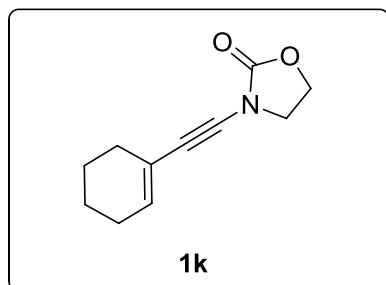

### 3-(cyclohex-1-en-1-ylethynyl)oxazolidin-2-one (1k)

**General procedure A** was performed with cyclohexyl acetylene (1 g, 1 mmol) and 2-oxazolidone (435 mg, 5 mmol). Purification by flash column chromatography (hexane/ethyl acetate = 1/1) afforded the title compound (1.2 g, 67%) as white solid.

IR (neat)  $\nu_{\text{max}}$ : 2931, 2851, 2248, 1760, 1699, 1479, 1419, 1326, 1200, 1140, 1071, 1034, 919, 749, 658;

$^1\text{H-NMR}$  (400 MHz,  $\text{CDCl}_3$ ):  $\delta$  6.13-6.10 (m, 1H), 4.45-4.40 (m, 2H), 3.92-3.88 (m, 2H), 2.14-2.06 (m, 4H), 1.66-1.55 (m, 4H);

$^{13}\text{C-NMR}$  (100 MHz,  $\text{CDCl}_3$ ):  $\delta$  156.2, 135.6, 119.7, 76.6, 72.9, 63.0, 47.3, 29.5, 25.8, 22.5, 21.6;

HRMS (ESI+): exact mass calculated for  $[\text{M}+\text{Na}]^+$  ( $\text{C}_{11}\text{H}_{13}\text{NaNO}_2$ ) requires  $m/z$  214.0946, found  $m/z$  214.0830.

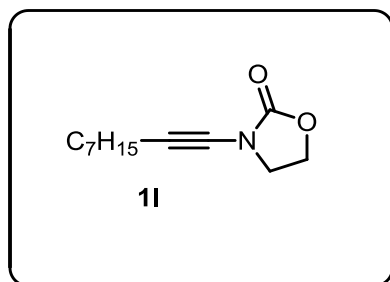

### **3-(non-1-yn-1-yl)oxazolidin-2-one (1I)**

**General procedure A** was performed with 1-nonyne (373 mg, 3 mmol) and 2-oxazolidone (1306 mg, 15 mmol). Purification by flash column chromatography (hexane/ethyl acetate = 7/3) afforded the title compound (330 mg, 37%) as yellowish oil.

IR (neat)  $\nu_{\text{max}}$ : 2924, 2855, 2268, 1763, 1412, 1196, 1109, 1034, 749;

$^1\text{H-NMR}$  (400 MHz,  $\text{CDCl}_3$ ):  $\delta$  4.42-4.38 (m, 2H), 3.88-3.84 (m, 2H), 2.29 (t,  $J = 7.2$  Hz, 2H), 1.55-1.49 (m, 2H), 1.41-1.35 (m, 2H), 1.32-1.26 (m, 6H), 0.88 (t,  $J = 7.0$  Hz, 3H);

$^{13}\text{C-NMR}$  (100 MHz,  $\text{CDCl}_3$ ):  $\delta$  156.7, 71.4, 70.2, 62.9, 47.2, 31.9, 29.0 (3C), 22.8, 18.6, 14.2;

HRMS (ESI+): exact mass calculated for  $[\text{M}+\text{Na}]^+$  ( $\text{C}_{12}\text{H}_{19}\text{NaNO}_2$ ) requires  $m/z$  232.1313, found  $m/z$  232.1302.



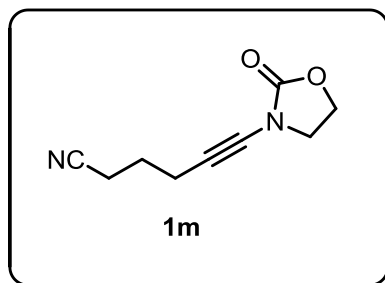

### 6-(2-oxazolidin-3-yl)hex-5-ynenitrile (1m)

**General procedure A** was performed with 5-cyano-1-pentyne (466 mg, 5 mmol) and 2-oxazolidone (2177 mg, 25 mmol). Purification by flash column chromatography (hexane/ethyl acetate = 1/1) afforded the title compound (330 mg, 37%) as yellowish oil.

IR (neat)  $\nu_{\max}$ : 2920, 2270, 2248, 1760, 1478, 1414, 1303, 1201, 1113, 1033, 973, 750;

$^1\text{H-NMR}$  (400 MHz,  $\text{CDCl}_3$ ):  $\delta$  4.44-4.40 (m, 2H), 3.90-3.86 (m, 2H), 2.53-2.49 (m, 4H), 1.93-1.86 (m, 2H);

$^{13}\text{C-NMR}$  (100 MHz,  $\text{CDCl}_3$ ):  $\delta$  156.6, 119.3, 72.1, 68.5, 63.0, 46.9, 24.7, 17.8, 16.3;

HRMS (ESI+): exact mass calculated for  $[\text{M}+\text{Na}]^+$  ( $\text{C}_9\text{H}_{10}\text{NaN}_2\text{O}_2$ ) requires  $m/z$  201.0640, found  $m/z$  201.0638.

### General procedure for the synthesis of isoquinolines

Under Argon atmosphere, mixture of ynamide (0.22 mmol, 1.1 eq.) and nitrile (0.2 mmol, 1.0 eq.) in dichloroethane (4 mL) was added dropwise of TfOH (0.22 mmol, 1.1 eq.) at 0 °C. The reaction was warm up immediately to RT for 30 min. Then the reaction was irradiated with microwave at 120 °C for 1 h or reflux at 120 °C for 16 h. The reaction was quenched with  $\text{Na}_2\text{CO}_3$  sat. sol. (5 mL) after cooled to rt, extracted with DCM (3 x 5 mL), dried over  $\text{Na}_2\text{SO}_4$  and the solvent was removed in vacuo. The crude product was purified by column chromatography on silica gel with hexane/ethyl acetate (7/3 or 1/1).

### Characterization of structurally new compounds

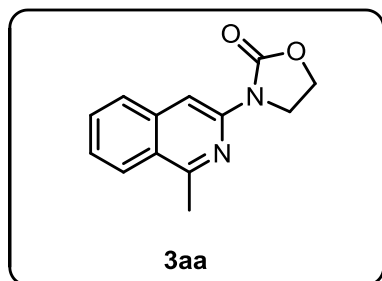

### 3-(1-methylisoquinolin-3-yl)oxazolidin-2-one (3aa)

IR (neat)  $\nu_{\max}$ : 2996, 2928, 1740, 1699, 1388, 1223, 1117, 1040, 750;

$^1\text{H-NMR}$  (400 MHz,  $\text{CDCl}_3$ ):  $\delta$  8.34 (s, 1H), 8.03 (dd,  $J = 8.4, 0.9$  Hz, 1H), 7.81 (d,  $J = 8.4$  Hz, 1H), 7.61 (m, 1H), 7.46 (m, 1H), 4.51 (m, 2H), 4.41 (m, 2H), 2.90 (s, 3H);

$^{13}\text{C-NMR}$  (100 MHz,  $\text{CDCl}_3$ ):  $\delta$  157.6, 155.4, 145.0, 138.0, 130.3, 127.6, 125.7, 125.5, 124.9, 106.0, 62.2, 44.6, 22.2;

HRMS (ESI+): exact mass calculated for  $[\text{M}+\text{Na}]^+$  ( $\text{C}_{13}\text{H}_{12}\text{NaN}_2\text{O}_2$ ) requires  $m/z$  251.0796, found  $m/z$  251.0785.

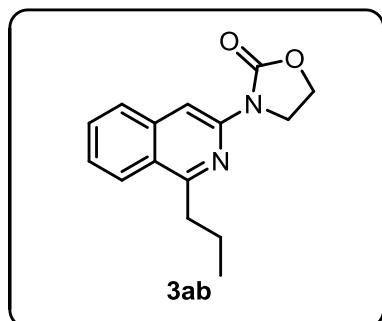

### 3-(1-propylisoquinolin-3-yl)oxazolidin-2-one (3ab)

IR (neat)  $\nu_{\max}$ : 2959, 2925, 1754, 1701, 1568, 1401, 1197, 1033, 754;

$^1\text{H-NMR}$  (400 MHz,  $\text{CDCl}_3$ ):  $\delta$  8.33 (s, 1H), 8.07 (dd,  $J = 8.5, 0.9$  Hz, 1H), 7.81 (d,  $J = 8.3$  Hz, 1H), 7.59 (m, 1H), 7.45 (m, 1H), 4.51 (m, 2H), 4.42 (m, 2H), 3.21 (t,  $J = 7.7$  Hz, 2H), 1.91 (m, 2H), 1.05 (t,  $J = 7.4$  Hz, 3H);

$^{13}\text{C-NMR}$  (100 MHz,  $\text{CDCl}_3$ ):  $\delta$  160.9, 155.4, 145.0, 138.3, 130.1, 127.8, 125.6, 125.1, 124.4, 105.8, 62.2, 44.6, 36.7, 22.2, 14.3;

HRMS (ESI+): exact mass calculated for  $[M+Na]^+$  ( $C_{15}H_{16}NaN_2O_2$ ) requires  $m/z$  279.1109, found  $m/z$  279.1100.

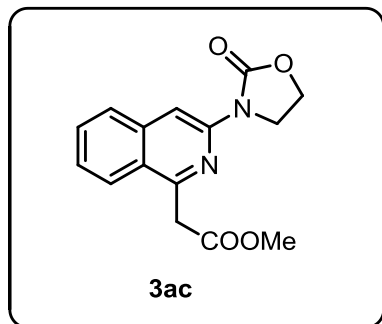

**methyl 2-(3-(2-oxooxazolidin-3-yl)isoquinolin-1-yl)acetate (3ac)**

IR (neat)  $\nu_{max}$ : 2922, 2853, 1739, 1589, 1430, 1247, 1118, 752;

$^1H$ -NMR (400 MHz,  $CDCl_3$ ):  $\delta$  8.44 (s, 1H), 7.96 (dd,  $J$  = 8.5, 0.8 Hz, 1H), 7.84 (d,  $J$  = 8.5 Hz, 1H), 7.63 (m, 1H), 7.48 (m, 1H), 4.51 (m, 2H), 4.38 (m, 2H), 4.29 (s, 2H), 3.73 (s, 3H);

$^{13}C$ -NMR (100 MHz,  $CDCl_3$ ):  $\delta$  170.8, 155.3, 153.1, 145.0, 138.5, 130.6, 127.8, 126.3, 124.8, 124.6, 107.3, 62.2, 52.3, 44.5, 41.7;

HRMS (ESI+): exact mass calculated for  $[M+Na]^+$  ( $C_{15}H_{14}NaN_2O_2$ ) requires  $m/z$  309.0851, found  $m/z$  309.0843.

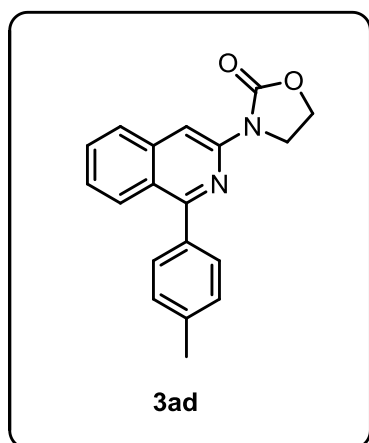

**3-(1-(p-tolyl)isoquinolin-3-yl)oxazolidin-2-one (3ad)**

IR (neat)  $\nu_{max}$ : 3029, 2971, 2919, 1755, 1620, 1586, 1557, 1480, 1446, 1422, 1405, 1389, 1364, 1227, 1185, 1134, 115, 1050, 1033, 879, 854, 829, 752, 725, 693, 621

$^1\text{H-NMR}$  (400 MHz,  $\text{CDCl}_3$ ):  $\delta$  8.48 (s, 1H), 8.07 (dd,  $J = 8.5, 0.9$  Hz, 1H), 7.88 (d,  $J = 8.4$  Hz, 1H), 7.63 (m, 3H), 7.41 (m, 1H), 7.35 (dd,  $J = 7.8, 0.6$  Hz, 2H), 4.51 (m, 2H), 4.44 (m, 2H), 2.48 (s, 3H);

$^{13}\text{C-NMR}$  (100 MHz,  $\text{CDCl}_3$ ):  $\delta$  159.1, 155.5, 145.3, 139.1, 138.9, 136.5, 130.3, 130.1 (2C), 129.2 (2C), 127.5, 127.4, 125.9, 124.1, 106.8, 62.3, 44.6, 21.5;

HRMS (ESI+): exact mass calculated for  $[\text{M}+\text{Na}]^+$  ( $\text{C}_{19}\text{H}_{16}\text{N}_2\text{NaO}_2$ ) requires  $m/z$  327.1109, found  $m/z$  327.1112.

### 3-(1-(4-bromophenyl)isoquinolin-3-yl)oxazolidin-2-one (3ae)

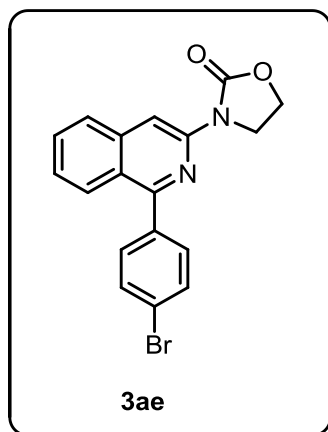

IR (neat)  $\nu_{\text{max}}$ : 1753, 1621, 1586, 1404, 1226, 1117, 1012, 853;

$^1\text{H-NMR}$  (400 MHz,  $\text{CDCl}_3$ ):  $\delta$  8.52 (s, 1H), 7.99 (dd,  $J = 8.6, 0.9$  Hz, 1H), 7.90 (d,  $J = 8.4$  Hz, 1H), 7.66 (m, 3H), 7.60 (m, 2H), 7.43 (m, 1H), 4.52 (m, 2H), 4.42 (m, 2H);

$^{13}\text{C-NMR}$  (100 MHz,  $\text{CDCl}_3$ ):  $\delta$  157.8, 155.4, 145.3, 139.2, 138.2, 131.8 (2C), 131.7 (2C), 130.5, 127.6, 126.9, 126.2, 123.8, 123.4, 107.3, 62.3, 44.6;

HRMS (ESI+): exact mass calculated for  $[\text{M}+\text{Na}]^+$  ( $\text{C}_{18}\text{H}_{13}\text{BrN}_2\text{NaO}_2$ ) requires  $m/z$  391.0058, found  $m/z$  391.0056.

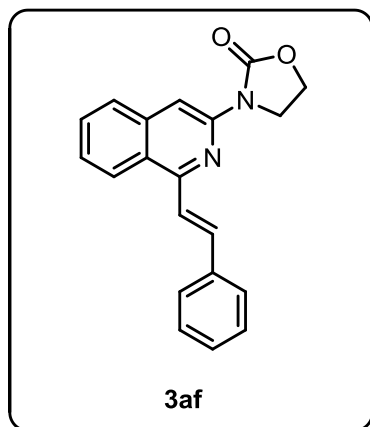

**(E)-3-(1-styrylisoquinolin-3-yl)oxazolidin-2-one (3af)**

IR (neat)  $\nu_{\max}$ : 2920, 2853, 1745, 1579, 1553, 1445, 1400, 1115, 743, 690;

$^1\text{H-NMR}$  (400 MHz,  $\text{CDCl}_3$ ):  $\delta$  8.42 (s, 1H), 8.25 (dd,  $J = 8.6, 0.7$  Hz, 1H), 7.92 (s, 2H), 7.81 (d,  $J = 8.4$  Hz, 1H), 7.67 (m, 2H), 7.60 (m, 1H), 7.50-7.41 (m, 3H), 7.35 (m, 1H), 4.57-4.47 (m, 4H);

$^{13}\text{C-NMR}$  (100 MHz,  $\text{CDCl}_3$ ):  $\delta$  155.4, 152.6, 145.3, 139.0, 136.9, 135.9, 130.2, 129.0 (2C), 128.9, 127.7, 127.6 (2C), 125.9, 124.2, 124.1, 122.4, 107.2, 62.2, 44.5;

HRMS (ESI+): exact mass calculated for  $[\text{M}+\text{Na}]^+$  ( $\text{C}_{20}\text{H}_{16}\text{N}_2\text{NaO}_2$ ) requires  $m/z$  339.1109, found  $m/z$  339.1103.

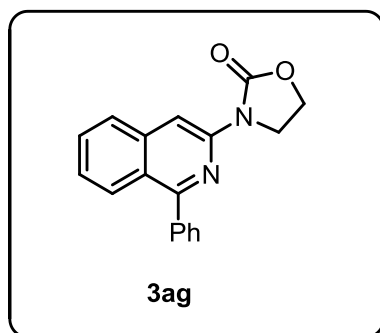

**3-(1-phenylisoquinolin-3-yl)oxazolidin-2-one (3ag)**

IR (neat)  $\nu_{\max}$ : 3058, 2917, 1748, 1620, 1401, 1244, 1116, 1050, 752;

$^1\text{H-NMR}$  (400 MHz,  $\text{CDCl}_3$ ):  $\delta$  8.50 (s, 1H), 8.05 (dd,  $J = 8.6, 0.9$  Hz, 1H), 7.89 (d,  $J = 8.4$  Hz, 1H), 7.71 (m, 2H), 7.63 (m, 1H), 7.52 (m, 3H), 7.41 (m, 1H), 4.51 (m, 2H), 4.44 (m, 2H);

$^{13}\text{C-NMR}$  (100 MHz,  $\text{CDCl}_3$ ):  $\delta$  159.0, 155.5, 145.3, 139.3, 139.1, 130.3, 130.2 (2C), 128.9, 128.4 (2C), 127.5, 127.4, 126.0, 124.0, 107.0, 62.2, 44.6;

HRMS (ESI+): exact mass calculated for  $[M+Na]^+$  ( $C_{18}H_{14}N_2NaO_2$ ) requires  $m/z$  313.0953, found  $m/z$  313.0947.

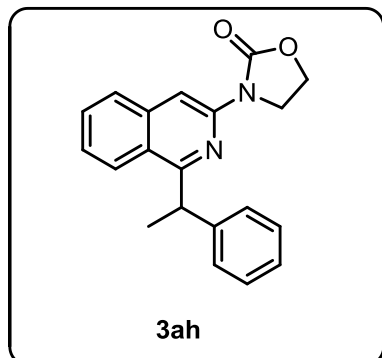

**3-(1-(1-phenylethyl)isoquinolin-3-yl)oxazolidin-2-one (3ah)**

IR (neat)  $\nu_{\max}$ : 2970, 2924, 1752, 1589, 1425, 1400, 1246, 1118, 751;

$^1\text{H-NMR}$  (400 MHz,  $\text{CDCl}_3$ ):  $\delta$  8.37 (s, 1H), 8.12 (d,  $J = 8.6$  Hz, 1H), 7.79 (d,  $J = 8.3$  Hz, 1H), 7.54 (m, 1H), 7.38 (m, 1H), 7.32 (m, 2H), 7.26 (m, 2H), 7.17 (m, 1H), 5.05 (q, 1H), 4.55-4.43 (m, 4H), 1.80 (d,  $J = 7.0$  Hz, 3H);

$^{13}\text{C-NMR}$  (100 MHz,  $\text{CDCl}_3$ ):  $\delta$  161.9, 155.4, 145.6, 144.8, 138.7, 130.0, 128.6 (2C), 127.8, 127.7 (2C), 126.4, 125.8, 125.0, 124.0, 106.1, 62.2, 44.6, 42.9, 21.9;

HRMS (ESI+): exact mass calculated for  $[M+Na]^+$  ( $C_{20}H_{18}N_2NaO_2$ ) requires  $m/z$  341.1266, found  $m/z$  341.1262.

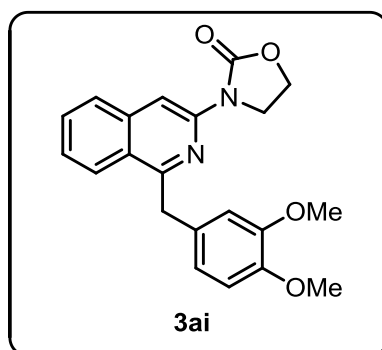

**3-(1-(3,4-dimethoxybenzyl)isoquinolin-3-yl)oxazolidin-2-one (3ai)**

IR (neat)  $\nu_{\max}$ : 2921, 2834, 1749, 1587, 1511, 1423, 1400, 1232, 1115, 1027, 750;

$^1\text{H-NMR}$  (400 MHz,  $\text{CDCl}_3$ ):  $\delta$  8.38 (s, 1H), 8.09 (dd,  $J = 8.5, 0.8$  Hz, 1H), 7.81 (d,  $J = 8.4$  Hz, 1H), 7.58 (m, 1H), 7.42 (m, 1H), 6.83 (s, 1H), 6.76 (s, 1H), 6.76 (s, 1H), 4.53 (s, 2H), 4.49 (m, 2H), 4.34 (m, 2H), 3.82 (s, 3H), 3.81 (s, 3H);

$^{13}\text{C-NMR}$  (100 MHz,  $\text{CDCl}_3$ ):  $\delta$  159.1, 155.4, 149.0, 147.7, 145.0, 138.6, 131.9, 130.2, 127.8, 125.9, 125.4, 124.4, 121.0, 112.4, 111.3, 106.4, 62.2, 56.0 (2C), 44.5, 41.0;

HRMS (ESI+): exact mass calculated for  $[\text{M}+\text{Na}]^+$  ( $\text{C}_{21}\text{H}_{20}\text{N}_2\text{NaO}_4$ ) requires  $m/z$  387.1321, found  $m/z$  387.1316.

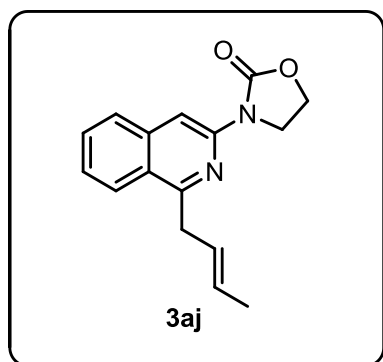

**3-(1-(but-2-en-1-yl)isoquinolin-3-yl)oxazolidin-2-one (3aj)**

IR (neat)  $\nu_{\text{max}}$ : 2920, 1749, 1587, 1425, 1401, 1117, 750;

$^1\text{H-NMR}$  (400 MHz,  $\text{CDCl}_3$ ):  $\delta$  8.35 (s, 1H), 8.08 (d,  $J = 8.8$  Hz, 1H), 7.82 (d,  $J = 8.2$  Hz, 1H), 7.60 (m, 1H), 7.45 (m, 1H), 5.84-5.76 (m, 1H), 5.63-5.55 (m, 1H), 4.54-4.50 (m, 2H), 4.46-4.41 (m, 2H), 3.95 (dt,  $J = 6.9, 1.3$  Hz, 2H), 1.68 (dt,  $J = 6.9, 1.5$  Hz, 3H);

$^{13}\text{C-NMR}$  (100 MHz,  $\text{CDCl}_3$ ):  $\delta$  159.4, 155.4, 145.1, 138.4, 130.2, 128.0, 127.8, 127.3, 125.7, 125.4, 124.3, 106.2, 62.2, 44.6, 38.8, 18.1;

HRMS (ESI+): exact mass calculated for  $[\text{M}+\text{Na}]^+$  ( $\text{C}_{16}\text{H}_{16}\text{N}_2\text{NaO}_2$ ) requires  $m/z$  291.1109, found  $m/z$  291.1104.

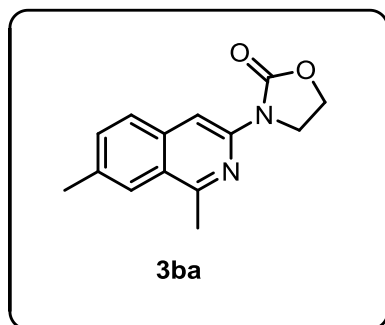

### 3-(1,7-dimethylisoquinolin-3-yl)oxazolidin-2-one (3ba)

IR (neat)  $\nu_{\max}$ : 2996, 2918, 1740, 1591, 1568, 1444, 1410, 1392, 1326, 1287, 1247, 1224, 1204, 1187, 1118, 1055, 1042, 868, 807, 755, 716;

$^1\text{H-NMR}$  (400 MHz,  $\text{CDCl}_3$ ):  $\delta$  8.28 (s, 1H), 7.78 (bs, 1H), 7.72 (d,  $J = 8.5$  Hz, 1H), 7.45 (dd,  $J = 8.5, 1.6$  Hz, 1H), 4.52-4.43 (m, 2H), 4.27-4.23 (m, 2H), 2.87 (s, 3H), 2.53 (s, 3H);

$^{13}\text{C-NMR}$  (100 MHz,  $\text{CDCl}_3$ ):  $\delta$  156.7, 155.4, 144.4, 136.2, 135.5, 132.6, 127.4, 125.0, 124.3, 106.0, 62.2, 44.6, 22.2, 22.1;

HRMS (ESI<sup>+</sup>): exact mass calculated for  $[\text{M}+\text{H}]^+$  ( $\text{C}_{14}\text{H}_{15}\text{N}_2\text{O}_2$ ) requires  $m/z$  243.1055, found  $m/z$  243.1055.

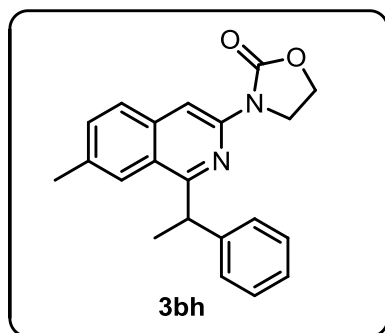

### 3-(7-methyl-1-(1-phenylethyl)isoquinolin-3-yl)oxazolidin-2-one (3bh)

IR (neat)  $\nu_{\max}$ : 2971, 2924, 1753, 1592, 1586, 1565, 1481, 1432, 1406, 1225, 1120, 1088, 1048, 872, 756, 703;

$^1\text{H-NMR}$  (400 MHz,  $\text{CDCl}_3$ ):  $\delta$  8.32 (bs, 1H), 7.88 (bs, 1H), 7.71 (d,  $J = 8.4$  Hz, 1H), 7.40 (dd,  $J = 8.5, 1.5$  Hz, 1H), 7.34-7.31 (m, 2H), 7.27-7.23 (m, 2H), 7.18-7.14 (m, 1H), 5.03 (q,  $J = 8.4$  Hz, 1H); 4.56-4.39 (m, 4H), 2.46 (bs, 3H), 1.78 (d,  $J = 7.0$  Hz, 3H)



$^{13}\text{C}$ -NMR (100 MHz,  $\text{CDCl}_3$ ):  $\delta$  161.1, 155.4, 145.6, 144.2, 137.0, 135.5, 132.4, 128.6 (2C), 127.8, 127.7 (2C), 126.4, 124.2, 123.7, 106.1, 62.2, 44.6, 42.7, 22.2, 22.0;

HRMS (ESI+): exact mass calculated for  $[\text{M}+\text{Na}]^+$  ( $\text{C}_{21}\text{H}_{20}\text{N}_2\text{NaO}_2$ ) requires  $m/z$  355.1525, found  $m/z$  355.1411.

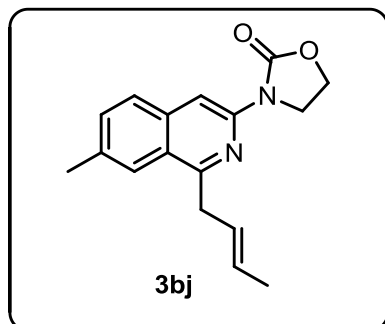

**(E)-3-(1-(but-2-en-1-yl)-7-methylisoquinolin-3-yl)oxazolidin-2-one (3bj)**

IR (neat)  $\nu_{\text{max}}$ : 2987, 1754, 1422, 1264, 1147, 1044, 896, 731, 703;

$^1\text{H}$ -NMR (400 MHz,  $\text{CDCl}_3$ ):  $\delta$  8.30 (s, 1H), 7.82 (bs, 1H), 7.72 (d,  $J = 8.5$  Hz, 1H), 7.44 (dd,  $J = 8.5, 1.7$  Hz, 1H), 5.85-5.77 (m, 1H), 5.65-5.54 (m, 1H), 4.53-4.47 (m, 2H), 4.43-4.39 (m, 2H), 3.91 (dt,  $J = 6.4, 1.3$  Hz, 2H), 2.52 (s, 3H), 1.69 (dq,  $J = 6.4, 1.4$  Hz, 3H);

$^{13}\text{C}$ -NMR (100 MHz,  $\text{CDCl}_3$ ):  $\delta$  158.5, 155.4, 144.5, 140.8, 136.7, 135.5, 132.5, 128.1, 127.6, 127.2, 124.5, 106.1, 62.2, 44.2, 38.7, 22.1, 18.2;

HRMS (ESI+): exact mass calculated for  $[\text{M}+\text{Na}]^+$  ( $\text{C}_{17}\text{H}_{18}\text{N}_2\text{NaO}_2$ ) requires  $m/z$  305.1368, found  $m/z$  305.1272.

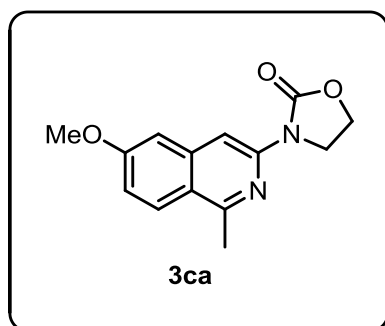

**3-(6-methoxy-1-methylisoquinolin-3-yl)oxazolidin-2-one (3ca)**

IR (neat)  $\nu_{\text{max}}$ : 2990, 2920, 1754, 1619, 1575, 1414, 1390, 1244, 1218, 1120, 1073, 1058, 895, 815, 754, 708, 6197;

$^1\text{H-NMR}$  (400 MHz,  $\text{CDCl}_3$ ):  $\delta$  8.24 (s, 1H), 7.91 (d,  $J = 8.7$ , 1H), 7.09-7.06 (m, 2H), 4.52-4.49 (m, 2H), 4.41-4.37 (m, 2H), 3.92 (s, 3H), 3.83 (bs, 3H);

$^{13}\text{C-NMR}$  (100 MHz,  $\text{CDCl}_3$ ):  $\delta$  160.9, 156.8, 155.4, 145.6, 140.2, 127.3, 120.6, 118.9, 105.4, 104.8, 62.2, 55.6, 44.6, 22.2;

HRMS (ESI+): exact mass calculated for  $[\text{M}+\text{Na}]^+$  ( $\text{C}_{14}\text{H}_{14}\text{N}_2\text{NaO}_3$ ) requires  $m/z$  281.1004, found  $m/z$  281.0907.

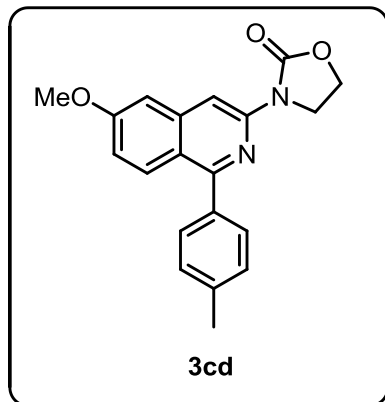

### **3-(6-methoxy-1-(p-tolyl)isoquinolin-3-yl)oxazolidin-2-one (3cd)**

IR (neat)  $\nu_{\text{max}}$ : 2995, 2921, 1745, 1621, 1592, 1560, 1463, 1424, 1227, 1164, 1118, 1050, 1023, 874, 833, 755, 713, 631;

$^1\text{H-NMR}$  (400 MHz,  $\text{CDCl}_3$ ):  $\delta$  8.28 (bs, 1H), 7.85 (d,  $J = 9.3$ , 1H), 7.48 (d,  $J = 8.3$  Hz, 2H), 7.23 (d,  $J = 7.8$  Hz, 2H), 7.04 (d,  $J = 2.5$  Hz, 1H), 6.92 (dd,  $J = 9.3$ , 2.5 Hz, 1H), 4.43-4.38 (m, 2H), 4.35-4.31 (m, 2H), 3.84 (s, 3H), 2.36 (s, 3H);

$^{13}\text{C-NMR}$  (100 MHz,  $\text{CDCl}_3$ ):  $\delta$  160.9, 158.5, 155.5, 145.9, 141.3, 138.8, 136.6, 130.0 (2C), 129.2 (2C), 129.1, 119.9, 119.2, 106.0, 104.6, 62.3, 55.6, 44.6, 21.5;

HRMS (ESI+): exact mass calculated for  $[\text{M}+\text{H}]^+$  ( $\text{C}_{20}\text{H}_{19}\text{N}_2\text{O}_3$ ) requires  $m/z$  335.1317, found  $m/z$  335.1385.

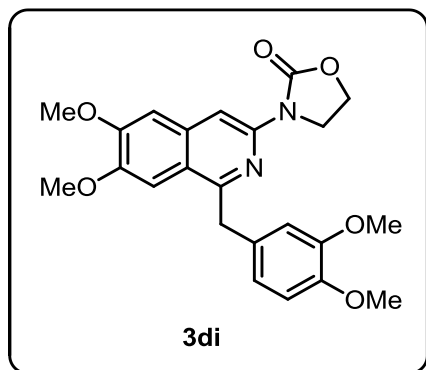

**3-(1-(3,4-dimethoxybenzyl)-6,7-dimethoxyisoquinolin-3-yl)oxazolidin-2-one (3di)**

IR (neat)  $\nu_{\max}$ : 2932, 1754, 1511, 1422, 1256, 1214, 1158, 1121, 996, 758;

$^1\text{H-NMR}$  (400 MHz,  $\text{CDCl}_3$ ):  $\delta$  8.24 (s, 1H), 7.24 (s, 1H), 6.81 (s, 1H), 6.76 (s, 1H), 6.76 (s, 1H), 4.48 (m, 2H), 4.44 (s, 2H), 4.32 (t, 2H), 3.97 (s, 3H), 3.89 (s, 3H), 3.82 (s, 3H), 3.79 (s, 3H);

$^{13}\text{C-NMR}$  (100 MHz,  $\text{CDCl}_3$ ):  $\delta$  156.2, 155.4, 153.0, 149.2, 149.0, 147.7, 144.3, 135.6, 132.1, 120.8, 120.1, 112.3, 111.3, 105.6, 105.5, 103.6, 62.2, 56.1, 56.0 (2C), 55.9, 44.5, 41.5;

HRMS (ESI+): exact mass calculated for  $[\text{M}+\text{Na}]^+$  ( $\text{C}_{23}\text{H}_{24}\text{N}_2\text{NaO}_6$ ) requires  $m/z$  447.1532, found  $m/z$  447.1531.

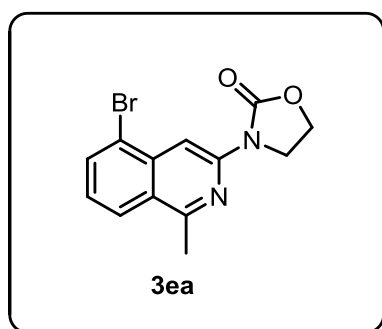

**3-(5-bromo-1-methylisoquinolin-3-yl)oxazolidin-2-one (3ea)**

IR (neat)  $\nu_{\max}$ : 2970, 2922, 1750, 1612, 1581, 1480, 1439, 1417, 1390, 1320, 1229, 1200, 1087, 1048, 864, 747, 633;

$^1\text{H-NMR}$  (400 MHz,  $\text{CDCl}_3$ ):  $\delta$  8.71 (s, 1H), 8.01 (dt,  $J = 8.5, 0.9$  Hz, 1H), 7.91 (dd,  $J = 7.4, 0.9$  Hz, 1H), 7.30 (dd,  $J = 8.5, 7.4$  Hz, 1H), 4.55-4.50 (m, 2H), 4.43-4.39 (m, 2H), 2.91 (s, 3H);

$^{13}\text{C}$ -NMR (100 MHz,  $\text{CDCl}_3$ ):  $\delta$  158.3, 146.3, 137.3, 134.2, 128.3, 125.9, 125.8, 125.2, 122.6, 105.3, 62.1, 44.6, 22.5;

HRMS (ESI+): exact mass calculated for  $[\text{M}+\text{Na}]^+$  ( $\text{C}_{13}\text{H}_{11}\text{BrNaN}_2\text{O}_2$ ) requires  $m/z$  307.0004, found  $m/z$  307.0078.

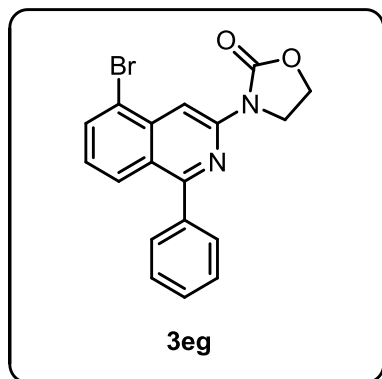

**3-(5-bromo-1-phenylisoquinolin-3-yl)oxazolidin-2-one (3eg)**

IR (neat)  $\nu_{\text{max}}$ : 2988, 2916, 1755, 1610, 1578, 1479, 1439, 1420, 1389, 1322, 1229, 1135, 1122, 1048, 1030, 868, 751, 703, 647;

$^1\text{H}$ -NMR (400 MHz,  $\text{CDCl}_3$ ):  $\delta$  8.89 (s, 1H), 8.01 (d,  $J = 8.5$  Hz, 1H), 7.93 (d,  $J = 7.4$  Hz, 2H), 7.69-7.66 (m, 2H), 7.54-7.53 (m, 3H), 4.55-4.51 (m, 2H), 4.46-4.42 (m, 2H);

$^{13}\text{C}$ -NMR (100 MHz,  $\text{CDCl}_3$ ):  $\delta$  159.9, 155.3, 146.6, 139.0 (2C), 138.3, 134.2 (2C), 130.3, 129.2, 128.5, 127.3, 125.9, 125.1, 122.3, 106.3, 62.2, 44.5;

HRMS (ESI+): exact mass calculated for  $[\text{M}+\text{Na}]^+$  ( $\text{C}_{18}\text{H}_{13}\text{BrNaN}_2\text{O}_2$ ) requires  $m/z$  391.0160, found  $m/z$  391.0048.

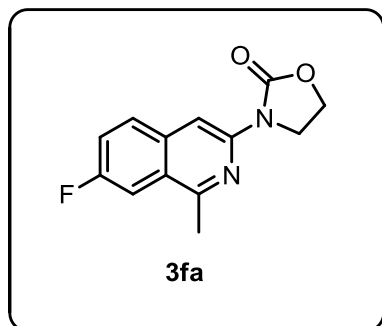

**3-(7-fluoro-1-methylisoquinolin-3-yl)oxazolidin-2-one (3fa)**

IR (neat)  $\nu_{\max}$ : 2994, 2970, 2921, 1752, 1589, 1482, 1444, 1411, 1371, 1242, 1183, 1133, 1117, 1067, 1044, 965, 930, 871, 756, 716;

$^1\text{H-NMR}$  (400 MHz,  $\text{CDCl}_3$ ):  $\delta$  8.35 (s, 1H), 7.83-7.80 (m, 1H), 7.62 (d,  $J = 9.9, 2.5$  Hz, 1H), 7.41 (td,  $J = 8.6, 2.5$  Hz, 1H), 4.54-4.50 (m, 2H), 4.42-4.37 (m, 2H), 2.85 (s, 3H);

$^{13}\text{C-NMR}$  (100 MHz,  $\text{CDCl}_3$ ):  $\delta$  161.3, 158.8, 156.8 (d,  $J_{\text{F-C}} = 5.9$  Hz), 155.4, 144.8 (d,  $J_{\text{F-C}} = 2.8$  Hz), 130.1 (d,  $J_{\text{F-C}} = 8.3$  Hz), 125.2 (d,  $J_{\text{F-C}} = 7.9$  Hz), 121.0 (d,  $J_{\text{F-C}} = 25.5$  Hz), 108.8 (d,  $J_{\text{F-C}} = 21.0$  Hz), 105.9 (d,  $J_{\text{F-C}} = 1.2$  Hz), 62.2, 44.6, 22.3;

HRMS (ESI+): exact mass calculated for  $[\text{M}+\text{Na}]^+$  ( $\text{C}_{13}\text{H}_{11}\text{FN}_2\text{NaO}_2$ ) requires  $m/z$  269.0805, found  $m/z$  269.0690.

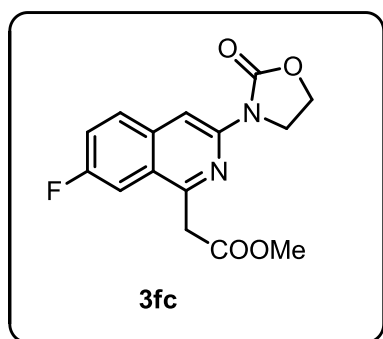

**methyl 2-(7-fluoro-3-(2-oxooxazolidin-3-yl)isoquinolin-1-yl)acetate (3fc)**

IR (neat)  $\nu_{\max}$ : 3094, 2995, 2850, 1752, 1590, 1482, 1440, 1409, 1341, 1244, 1175, 1118, 1060, 930, 875, 820, 756, 716;

$^1\text{H-NMR}$  (400 MHz,  $\text{CDCl}_3$ ):  $\delta$  8.47 (s, 1H), 7.88-7.84 (m, 1H), 7.57 (dd,  $J = 9.7, 2.0$  Hz, 1H), 7.43 (td,  $J = 8.6$  (2.4 Hz, 1H), 4.54-4.50 (m, 2H), 4.40-4.35 (m, 2H), 4.23 (s, 2H), 3.74 (s, 3H) ;

$^{13}\text{C-NMR}$  (100 MHz,  $\text{CDCl}_3$ ):  $\delta$  170.5, 161.6, 159.1, 155.3, (d,  $J_{\text{F-C}} = 6.4$  Hz), 144.9, 135.6, 130.3 (d,  $J_{\text{F-C}} = 8.7$  Hz), 125.0, 121.5 (d,  $J_{\text{F-C}} = 25.8$  Hz), 108.3 (d,  $J_{\text{F-C}} = 21.7$  Hz), 107.3, 62.3, 52.5, 44.5, 41.7;

HRMS (ESI+): exact mass calculated for  $[\text{M}+\text{Na}]^+$  ( $\text{C}_{15}\text{H}_{13}\text{FN}_2\text{NaO}_2$ ) requires  $m/z$  327.0859, found  $m/z$  327.0746.

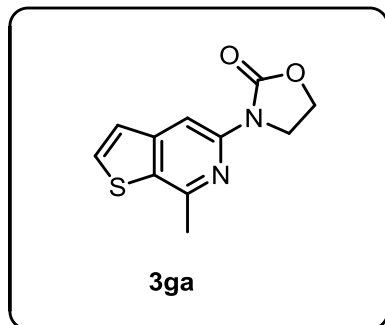

**3-(7-methylthieno[2,3-c]pyridin-5-yl)oxazolidin-2-one (3ga)**

IR (neat)  $\nu_{\text{max}}$ : 2992, 2920, 1745, 1582, 1558, 1480, 1416, 1378, 1306, 1232, 1198, 1103, 1085, 1044, 859, 821, 753, 728;

$^1\text{H-NMR}$  (400 MHz,  $\text{CDCl}_3$ ):  $\delta$  8.41 (s, 1H), 7.63 (d,  $J = 5.4$  Hz 1H), 7.34 (d,  $J = 5.4$  Hz 1H), 4.52-4.47 (m, 2H), 4.38-4.34 (m, 2H), 2.71 (s, 3H);

$^{13}\text{C-NMR}$  (100 MHz,  $\text{CDCl}_3$ ):  $\delta$  155.4, 150.8, 147.3, 146.6, 132.2, 131.2, 124.2, 104.3, 62.1, 44.9, 23.4;

HRMS (ESI+): exact mass calculated for  $[\text{M}+\text{H}]^+$  ( $\text{C}_{11}\text{H}_{11}\text{N}_2\text{O}_2\text{S}$ ) requires  $m/z$  235.0463, found  $m/z$  235.0534.

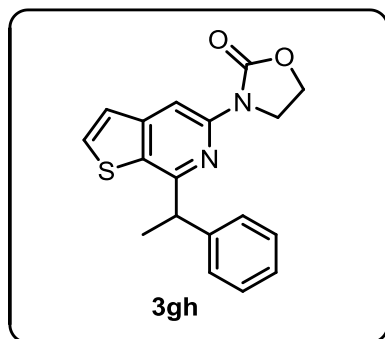

**3-(7-(1-phenylethyl)thieno[2,3-c]pyridin-5-yl)oxazolidin-2-one (3gh)**

IR (neat)  $\nu_{\text{max}}$ : 3026, 2971, 2925, 1753, 1581, 1555, 1480, 1416, 1372, 1230, 1197, 1100, 863, 756, 732, 701;

$^1\text{H-NMR}$  (400 MHz,  $\text{CDCl}_3$ ):  $\delta$  8.51 (s, 1H), 7.66 (d,  $J = 5.4$  Hz, 1H), 7.48 (m, d,  $J = 7.4$  Hz, 2H), 7.40-7.34 (m, 3H), 7.30-7.26 (m, 1H), 4.64-4.50 (m, 5H), 1.87 (d,  $J = 6.9$  Hz, 3H);

$^{13}\text{C-NMR}$  (100 MHz,  $\text{CDCl}_3$ ):  $\delta$  156.3, 155.4, 147.8, 146.5, 144.0, 132.3, 130.5, 128.5 (2C), 128.0 (2C), 126.8, 124.0, 104.5, 62.2, 46.7, 44.9, 20.7;

HRMS (ESI+): exact mass calculated for  $[M+H]^+$  ( $C_{18}H_{17}N_2O_2S$ ) requires  $m/z$  325.0932, found  $m/z$  325.1007.

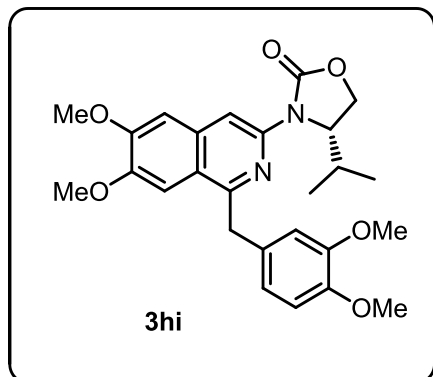

**3-(1-(3,4-dimethoxybenzyl)-6,7-dimethoxyisoquinolin-3-yl)-4-isopropylloxazolidin-2-one (3hi)**

IR (neat)  $\nu_{\max}$ : 3005, 2970, 1755, 1594, 1573, 1511, 1422, 1368, 1231, 1215, 1160, 1049, 874, 763;

$^1H$ -NMR (400 MHz,  $CDCl_3$ ):  $\delta$  8.19 (s, 1H), 7.28 (s, 1H), 7.09 (s, 1H), 6.79 (s, 1H), 6.79 (s, 1H), 6.76 (br s, 1H), 4.86 (dt,  $J = 8.8, 3.6$  Hz, 1H), 4.49 (d,  $J = 15.2$  Hz, 1H), 4.40 (d,  $J = 20.8$  Hz, 1H), 4.38 (dd,  $J = 9.0, 3.3$  Hz, 1H), 4.26 (dd,  $J = 9.0, 3.9$  Hz, 1H), 3.99 (s, 3H), 3.93 (s, 3H), 3.84 (s, 3H), 3.78 (s, 3H); 2.37-2.28 (m, 1H), 1.33 (d,  $J = 7.1$  Hz, 3H), 1.18 (d,  $J = 7.0$  Hz, 3H);

$^{13}C$ -NMR (100 MHz,  $CDCl_3$ ):  $\delta$  156.3, 155.9, 153.0, 149.4, 149.1, 147.7, 143.9, 135.7, 132.0, 121.2, 120.2, 112.5, .111.4, 107.6, 105.7, 103.6, 63.1, 59.3, 56.2, 56.1, 56.0, 55.9, 41.5, 28.5, 18.0, 14.6;

HRMS (ESI+): exact mass calculated for  $[M+H]^+$  ( $C_{26}H_{31}N_2O_6$ ) requires  $m/z$  467.1743, found  $m/z$  467.2104, found  $m/z$  467.2181.

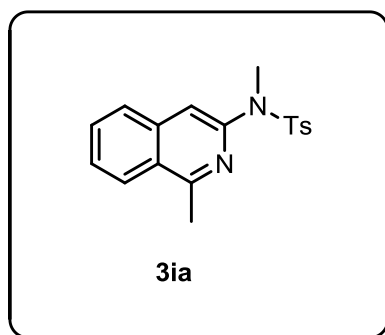

**N,4-dimethyl-N-(1-methylisoquinolin-3-yl)benzenesulfonamide (3ia)**

IR (neat)  $\nu_{\max}$ : 2957, 2853, 1626, 1588, 1375, 1176;

$^1\text{H-NMR}$  (400 MHz,  $\text{CDCl}_3$ ):  $\delta$  8.04 (d,  $J = 8.6$ , 1H), 7.83 (d,  $J = 8.4$  Hz, 1H), 7.77 (s, 1H), 7.67-7.63 (m, 1H), 7.56-7.52 (m, 3H), 7.20 (d,  $J = 8.2$  Hz, 2H), 3.54 (s, 3H), 2.78 (s, 3H), 2.39 (s, 3H);

$^{13}\text{C-NMR}$  (100 MHz,  $\text{CDCl}_3$ ):  $\delta$  158.0, 147.5, 143.5, 137.6, 135.4, 130.3, 129.4 (2C), 128.0 (2C), 127.8, 126.9, 126.1, 125.5, 115.1, 36.2, 22.0, 21.7;

HRMS (ESI+): exact mass calculated for  $[\text{M}+\text{Na}]^+$  ( $\text{C}_{18}\text{H}_{18}\text{N}_2\text{NaO}_2\text{S}$ ) requires  $m/z$  349.0987, found  $m/z$  349.0986.

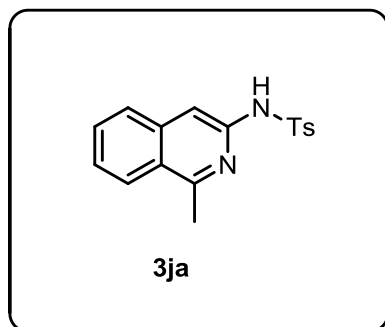

#### 4-methyl-N-(1-methylisoquinolin-3-yl)benzenesulfonamide (3ja)

IR (neat)  $\nu_{\text{max}}$ : 2922, 2853, 1663, 1623, 1445, 1371, 1155, 1090, 746, 661;

$^1\text{H-NMR}$  (400 MHz,  $\text{CDCl}_3$ ):  $\delta$  7.98 (dd,  $J = 8.4$ , 0.9 Hz, 1H), 7.81 (d,  $J = 8.3$  Hz, 2H), 7.73 (d,  $J = 8.2$  Hz, 1H), 7.60 (m, 1H), 7.54 (s, 1H), 7.44 (m, 1H), 7.21 (d,  $J = 8.0$  Hz, 2H), 2.80 (s, 3H), 2.33 (s, 3H);

$^{13}\text{C-NMR}$  (100 MHz,  $\text{CDCl}_3$ ):  $\delta$  159.1, 144.4, 144.1, 138.0, 136.7, 130.7, 129.8 (2C), 127.5 (2C), 127.2, 125.9, 125.7, 125.3, 104.8, 21.9, 21.6;

HRMS (ESI+): exact mass calculated for  $[\text{M}+\text{H}]^+$  ( $\text{C}_{17}\text{H}_{17}\text{N}_2\text{O}_2\text{S}$ ) requires  $m/z$  313.1011, found  $m/z$  313.1001.

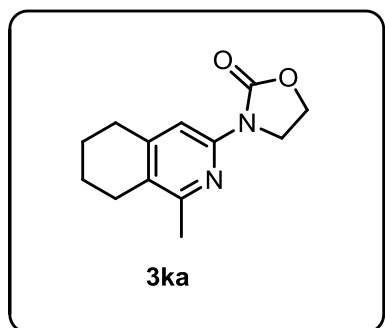

#### 3-(1-methyl-5,6,7,8-tetrahydroisoquinolin-3-yl)oxazolidin-2-one (3ka)



IR (neat)  $\nu_{\max}$ : 2922, 2858, 1741, 1594, 1572, 1458, 1424, 1399, 1231, 1205, 1118, 1059, 1043, 980, 902, 756;

$^1\text{H-NMR}$  (400 MHz,  $\text{CDCl}_3$ ):  $\delta$  7.71 (s, 1H), 4.46-4.42 (m, 2H), 4.28-4.23 (m, 2H), 2.76 (t,  $J = 2.6$  Hz, 2H), 2.58 (t,  $J = 2.6$  Hz, 2H), 2.35 (s, 3H), 1.87-1.81 (m, 2H), 1.78-1.72 (m, 2H);

$^{13}\text{C-NMR}$  (100 MHz,  $\text{CDCl}_3$ ):  $\delta$  155.4, 154.9, 148.2, 147.4, 126.5, 110.5, 62.1, 44.3, 30.1, 25.8, 23.3, 22.4, 22.0;

HRMS (ESI+): exact mass calculated for  $[\text{M}+\text{H}]^+$  ( $\text{C}_{13}\text{H}_{17}\text{N}_2\text{O}_2$ ) requires  $m/z$  233.1212, found  $m/z$  233.1280.

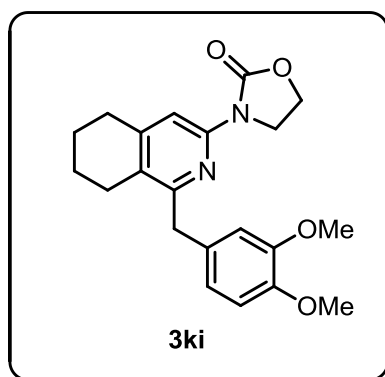

**3-(1-(3,4-dimethoxybenzyl)-5,6,7,8-tetrahydroisoquinolin-3-yl)oxazolidin-2-one (3ki)**

IR (neat)  $\nu_{\max}$ : 2995, 2927, 2856, 1755, 1592, 1566, 1513, 1453, 1404, 1320, 1232, 1140, 1114, 1029, 758;

$^1\text{H-NMR}$  (400 MHz,  $\text{CDCl}_3$ ):  $\delta$  7.76 (s, 1H), 6.77-6.75 (m, 2H), 6.68 (dd,  $J = 8.2, 1.9$  Hz, 1H), 4.46-4.42 (m, 2H), 4.24-4.20 (m, 2H), 3.98 (m, 2H), 3.84 (s, 3H), 3.83 (s, 3H), 2.77 (t,  $J = 6.2$  Hz, 2H), 2.62 (t,  $J = 6.2$  Hz, 2H), 1.80-1.71 (m, 4H);

$^{13}\text{C-NMR}$  (100 MHz,  $\text{CDCl}_3$ ):  $\delta$  156.5, 155.3, 149.0, 148.9, 147.6, 147.5, 131.9, 126.6, 120.9, 112.5, 111.3, 110.9, 62.1, 56.1 (2C), 44.3, 40.8, 30.2, 25.4, 23.2, 22.3;

HRMS (ESI+): exact mass calculated for  $[\text{M}+\text{Na}]^+$  ( $\text{C}_{21}\text{H}_{24}\text{N}_2\text{NaO}_4$ ) requires  $m/z$  391.1174, found  $m/z$  391.1624.

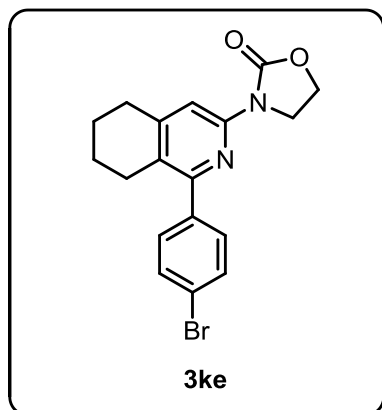

### 3-(1-(4-bromophenyl)-5,6,7,8-tetrahydroisoquinolin-3-yl)oxazolidin-2-one (3ke)

IR (neat)  $\nu_{\text{max}}$ : 2923, 2853, 1758, 1460, 1511, 1377, 1400, 1264, 736, 706;

$^1\text{H-NMR}$  (400 MHz,  $\text{CDCl}_3$ ):  $\delta$  7.92 (s, 1H), 7.55 (d,  $J = 8.5$  Hz, 2H), 7.37 (d,  $J = 8.5$  Hz, 2H), 4.47-4.43 (m, 2H), 4.27-4.23 (m, 2H), 2.88 (t,  $J = 6.3$  Hz, 2H), 2.64 (t,  $J = 6.3$  Hz, 2H), 1.84-1.78 (m, 2H), 1.74-1.69 (m, 2H);

$^{13}\text{C-NMR}$  (100 MHz,  $\text{CDCl}_3$ ):  $\delta$  155.4, 155.0, 149.7, 148.0, 139.4, 131.3 (2C), 130.9 (2C), 126.5, 122.3, 112.0, 62.2, 44.3, 30.0, 27.4, 23.3, 22.4

HRMS (ESI+): exact mass calculated for  $[\text{M}+\text{Na}]^+$  ( $\text{C}_{18}\text{H}_{17}\text{N}_2\text{BrNaO}_2$ ) requires  $m/z$  395.0473, found  $m/z$  395.0377.

### General procedure for the synthesis of thioalkynes

In a dry argon-flushed Schlenk flask, alkyne (5 mmol) was dissolved in THF (5 mL). The solution was cooled to  $-78$  °C and  $n\text{BuLi}$  (5.5 mmol, 3.44 mL, 1.6 M in hexane) was added dropwise. After 10 min of stirring at  $-78$  °C, dimethyl disulfide (565 mg, 6 mmol) was added and the solution was allowed to warm to room temperature and stirred for 1 h. The reaction mixture was quenched with saturated aqueous  $\text{NH}_4\text{Cl}$ -solution and extracted with EtOAc (3 x 5 mL). The combined organic layers were dried over  $\text{Na}_2\text{SO}_4$  and the solvent was removed in vacuo. The crude product was purified by column chromatography ( $\text{Al}_2\text{O}_3$  neutral, pentane).

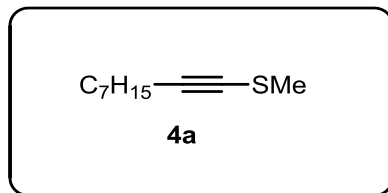

#### methyl(non-1-yn-1-yl)sulfane (4a)

General procedure was performed with 1-nonyne (621 mg, 5 mmol) and nBuLi (5.5 mmol, 3.44 mL, 1.6 M in hexane) and dimethyl disulfide (565 mg, 6 mmol). Purification by column chromatography with Al<sub>2</sub>O<sub>3</sub> (pentane) afforded the title compound (340 mg, 40%) as colourless oil.

IR (neat)  $\nu_{\text{max}}$ : 2927, 2856, 1462, 1433, 1276, 976, 765;

<sup>1</sup>H-NMR (400 MHz, CDCl<sub>3</sub>):  $\delta$  2.35 (s, 3H), 2.28 (t,  $J$  = 7.1 Hz, 2H), 1.54-1.47 (m, 2H), 1.39-1.27 (m, 8H), 0.89 (t,  $J$  = 7.0 Hz, 3H);

<sup>13</sup>C-NMR (100 MHz, CDCl<sub>3</sub>):  $\delta$  93.5, 69.9, 31.9, 29.0, 28.9 (2C), 22.8, 20.2, 19.5, 14.2;

HRMS (ESI+): exact mass calculated for M<sup>+</sup> (C<sub>10</sub>H<sub>18</sub>S) requires  $m/z$  170.1129, found  $m/z$  170.1123.

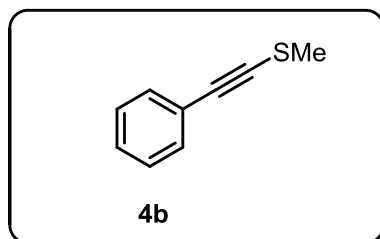

#### methyl(phenylethynyl)sulfane (4b)

General procedure was performed with phenylacetylene (511 mg, 5 mmol) and nBuLi (5.5 mmol, 3.44 mL, 1.6 M in hexane) and dimethyl disulfide (565 mg, 6 mmol). Purification by column chromatography with Al<sub>2</sub>O<sub>3</sub> (pentane) afforded the title compound (578 mg, 78%) as colourless oil.

IR (neat)  $\nu_{\text{max}}$ : 2926, 2167, 1486, 1440, 1313, 977, 690;

<sup>1</sup>H-NMR (400 MHz, CDCl<sub>3</sub>):  $\delta$  7.43-7.40 (m, 2H), 7.30-7.28 (m, 3H), 2.48 (s, 3H);

<sup>13</sup>C-NMR (100 MHz, CDCl<sub>3</sub>):  $\delta$  131.6 (2C), 128.4 (2C), 128.2, 123.6, 92.0, 81.1, 19.6;

HRMS (ESI+): exact mass calculated for  $M^+$  ( $C_9H_8S$ ) requires  $m/z$  148.0347, found  $m/z$  148.0338.

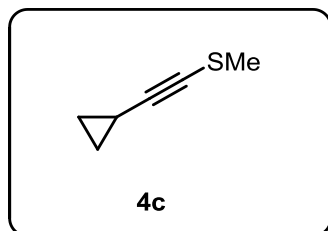

#### **(cyclopropylethynyl)(methyl)sulfane (4c)**

General procedure was performed with cyclopropylacetylene (132 mg, 2 mmol) and *n*BuLi (2.2 mmol, 1.38 mL, 1.6 M in hexane) and dimethyl disulfide (283 mg, 3 mmol). Purification by column chromatography with  $Al_2O_3$  (pentane) afforded the title compound (117 mg, 52%) as colourless oil.

IR (neat)  $\nu_{max}$ : 2925, 2854, 2363, 2337, 1460, 1276, 914, 755;

$^1H$ -NMR (400 MHz,  $CDCl_3$ ):  $\delta$  2.33 (s, 3H), 1.36-1.30 (m, 1H), 0.81-0.76 (m, 2H), 0.75-0.69 (m, 2H);

$^{13}C$ -NMR (100 MHz,  $CDCl_3$ ):  $\delta$  97.2, 65.9, 19.6, 8.96 (2C), 0.82;

HRMS (ESI+): exact mass calculated for  $M^+$  ( $C_6H_8S$ ) requires  $m/z$  112.0347, found  $m/z$  112.0344.

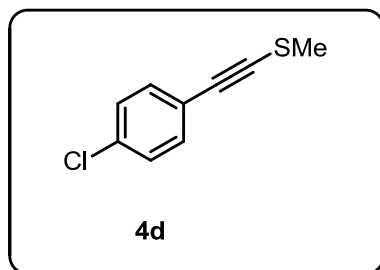

#### **((4-chlorophenyl)ethynyl)(methyl)sulfane (4d)**

General procedure was performed with 1-chloro-4-ethynylbenzene (273 mg, 2 mmol) and *n*BuLi (2.2 mmol, 1.38 mL, 1.6 M in hexane) and dimethyl disulfide (283 mg, 3 mmol). Purification by column chromatography with  $Al_2O_3$  (pentane) afforded the title compound (219 mg, 60%) as colourless oil.

IR (neat)  $\nu_{max}$ : 2926, 2853, 2167, 1490, 1313, 1100, 1014, 830;

$^1H$ -NMR (400 MHz,  $CDCl_3$ ):  $\delta$  7.34-7.32 (m, 2H), 7.27-7.25 (m, 2H, overlap with  $CHCl_3$ ), 2.48 (s, 3H);

$^{13}\text{C}$ -NMR (100 MHz,  $\text{CDCl}_3$ ):  $\delta$  134.2, 132.8 (2C), 128.8 (2C), 122.1, 90.9, 82.4, 19.5;

HRMS (ESI+): exact mass calculated for  $\text{M}^+$  ( $\text{C}_9\text{H}_7\text{S}$ ) requires  $m/z$  181.9957, found  $m/z$  181.9952.

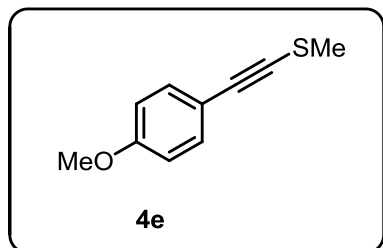

#### **((4-methoxyphenyl)ethynyl)(methyl)sulfane (4e)**

General procedure was performed with 4-ethynylanisole (132 mg, 2 mmol) and  $n\text{BuLi}$  (2.2 mmol, 1.38 mL, 1.6 M in hexane) and dimethyl disulfide (283 mg, 3 mmol). Purification by column chromatography with  $\text{Al}_2\text{O}_3$  (pentane) afforded the title compound (143 mg, 40%) as colourless oil.

IR (neat)  $\nu_{\text{max}}$ : 3003, 2928, 2836, 1604, 1506, 1289, 1249, 1172, 1032, 832, 750;

$^1\text{H}$ -NMR (400 MHz,  $\text{CDCl}_3$ ):  $\delta$  7.37 (d,  $J = 8.9$  Hz, 2H), 6.82 (d,  $J = 8.9$  Hz, 2H), 3.80 (s, 3H), 2.46 (s, 3H);

$^{13}\text{C}$ -NMR (100 MHz,  $\text{CDCl}_3$ ):  $\delta$  159.8, 133.5 (2C), 115.7, 114.1 (2C), 91.8, 79.1, 55.4, 19.6;

HRMS (ESI+): exact mass calculated for  $\text{M}^+$  ( $\text{C}_{10}\text{H}_{10}\text{OS}$ ) requires  $m/z$  178.0452, found  $m/z$  178.0446.

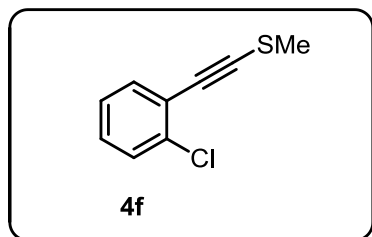

#### **((2-chlorophenyl)ethynyl)(methyl)sulfane (4f)**

General procedure was performed with 1-chloro-2-ethynylbenzene (273 mg, 2 mmol) and  $n\text{BuLi}$  (2.2 mmol, 1.38 mL, 1.6 M in hexane) and dimethyl disulfide (283 mg, 3 mmol). Purification by column chromatography with  $\text{Al}_2\text{O}_3$  (pentane) afforded the title compound (219 mg, 60%) as colourless oil.

IR (neat)  $\nu_{\text{max}}$ : 3067, 2927, 2171, 1469, 1434, 1313, 1261, 1059, 750;

$^1\text{H-NMR}$  (400 MHz,  $\text{CDCl}_3$ ):  $\delta$  7.43-7.41 (m, 1H), 7.39-7.36 (m, 1H), 7.21-7.18 (m, 2H), 2.52 (s, 3H);

$^{13}\text{C-NMR}$  (100 MHz,  $\text{CDCl}_3$ ):  $\delta$  135.6, 132.9, 129.4, 128.9, 126.5, 123.5, 89.0, 87.1, 19.6;

HRMS (ESI+): exact mass calculated for  $\text{M}^+$  ( $\text{C}_9\text{H}_7\text{ClS}$ ) requires  $m/z$  181.9957, found  $m/z$  183.9952.

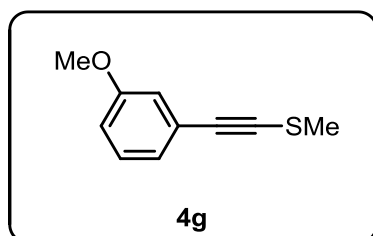

#### **((3-methoxyphenyl)ethynyl)(methyl)sulfane (4g)**

General procedure was performed with 3-ethynylanisole (132 mg, 2 mmol) and  $n\text{BuLi}$  (2.2 mmol, 1.38 mL, 1.6 M in hexane) and dimethyl disulfide (283 mg, 3 mmol). Purification by column chromatography with  $\text{Al}_2\text{O}_3$  (pentane) afforded the title compound (125 mg, 35%) as colourless oil.

IR (neat)  $\nu_{\text{max}}$ : 3001, 2928, 2834, 2162, 1598, 1575, 1285, 1158, 1044, 777;

$^1\text{H-NMR}$  (400 MHz,  $\text{CDCl}_3$ ):  $\delta$  7.20 (t,  $J = 8.0$  Hz, 1H), 7.01 (dt,  $J = 7.7, 1.2$  Hz, 1H), 6.94 (dd,  $J = 1.5, 1.1$  Hz, 1H), 6.85 (ddd,  $J = 8.3, 2.7, 1.0$  Hz, 1H), 3.79 (s, 3H), 2.48 (s, 3H);

$^{13}\text{C-NMR}$  (100 MHz,  $\text{CDCl}_3$ ):  $\delta$  159.5, 129.5, 124.5, 124.1, 116.3, 114.9, 92.0, 81.0, 55.4, 19.5;

HRMS (ESI+): exact mass calculated for  $\text{M}^+$  ( $\text{C}_{10}\text{H}_{10}\text{OS}$ ) requires  $m/z$  178.0452, found  $m/z$  178.0444.

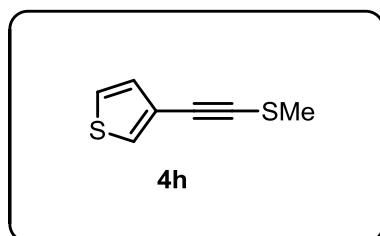

#### **3-((methylthio)ethynyl)thiophene (4h)**

General procedure was performed with 3-Ethynylthiophene (216 mg, 2 mmol) and nBuLi (2.2 mmol, 1.38 mL, 1.6 M in hexane) and dimethyl disulfide (283 mg, 3 mmol). Purification by column chromatography with Al<sub>2</sub>O<sub>3</sub> (pentane) afforded the title compound (170 mg, 55%) as colourless oil.

IR (neat)  $\nu_{\max}$ : 3105, 2925, 2163, 1432, 1354, 1311, 976, 785;

<sup>1</sup>H-NMR (400 MHz, CDCl<sub>3</sub>):  $\delta$  7.44 (dd,  $J$  = 2.9, 1.1 Hz, 1H), 7.24 (dd,  $J$  = 5.0, 2.9 Hz, 1H), 7.10 (dd,  $J$  = 5.0, 1.1 Hz, 1H), 2.46 (s, 3H);

<sup>13</sup>C-NMR (100 MHz, CDCl<sub>3</sub>):  $\delta$  130.2, 129.3, 125.3, 122.6, 86.9, 80.5, 19.5;

HRMS (ESI+): exact mass calculated for M<sup>+</sup> (C<sub>7</sub>H<sub>6</sub>S<sub>2</sub>) requires  $m/z$  153.9911, found  $m/z$  153.9904.

### General procedure for the synthesis of pyrimidines with methyl(non-1-yn-1-yl)sulfane.

Under Argon, TfOH (0.20 mmol, 1.0 eq.) was slowly added to a cold (0 °C) solution of thio-alkyne (0.2 mmol, 1.0 eq) and nitrile (1.0 mmol, 5.0 eq.) in DCM (2 mL). The result mixture was warm up to rt and stirred for 16 h at ambient temperature. The reaction was quenched with NaHCO<sub>3</sub> sat. sol. (5 mL) after cooled to rt, extracted with DCM (3 x 5 mL), dried over Na<sub>2</sub>SO<sub>4</sub>. 4-Dimethylaminopyridine (12.2 mg, 0.1 mmol) was added before the filtration. Then the solvent was removed in vacuo. After obtain the crude proton nmr, the crude product was purified by column chromatography on silica gel with hexane/ethyl acetate (20:1 or 5:1).

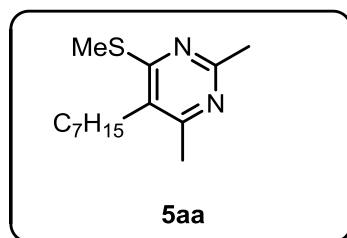

#### 5-heptyl-2,4-dimethyl-6-(methylthio)pyrimidine (5aa)

IR (neat)  $\nu_{\max}$ : 2924, 2854, 1530, 1407, 1357, 1157, 854;

<sup>1</sup>H-NMR (400 MHz, CDCl<sub>3</sub>):  $\delta$  2.57-2.53 (m, 5H), 2.50 (s, 3H), 2.37 (s, 3H), 1.52-1.45 (m, 2H), 1.38-1.25 (m, 8H), 0.86 (t,  $J$  = 7.1 Hz, 3H);

$^{13}\text{C}$ -NMR (100 MHz,  $\text{CDCl}_3$ ):  $\delta$  167.9, 163.9, 161.4, 127.2, 31.9, 30.0, 29.1, 28.2, 27.9, 25.7, 22.7, 21.4, 14.2, 12.8;

HRMS (ESI<sup>+</sup>): exact mass calculated for  $[\text{M}+\text{H}]^+$  ( $\text{C}_{14}\text{H}_{25}\text{N}_2\text{S}$ ) requires  $m/z$  253.1738, found  $m/z$  253.1722.

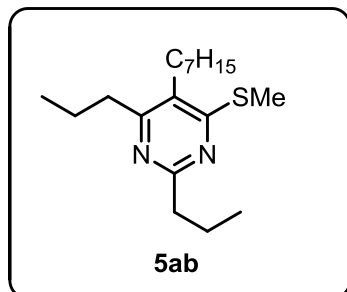

**5-heptyl-4-(methylthio)-2,6-dipropylpyrimidine (5ab)**

IR (neat)  $\nu_{\text{max}}$ : 2959, 2927, 2349, 1550, 1464, 1403, 750;

$^1\text{H}$ -NMR (400 MHz,  $\text{CDCl}_3$ ):  $\delta$  2.79 (t,  $J = 7.7$  Hz, 2H), 2.64-2.55 (m, 4H), 2.54 (s, 3H), 1.87-1.78 (m, 2H), 1.74-1.65 (m, 2H), 1.56-1.48 (m, 2H), 1.43-1.29 (m, 8H), 1.00-0.96 (m, 6H), 0.89 (t,  $J = 6.9$  Hz, 3H);

$^{13}\text{C}$ -NMR (100 MHz,  $\text{CDCl}_3$ ):  $\delta$  168.0, 167.1, 164.9, 127.0, 41.2, 36.4, 31.9, 30.1, 29.1, 28.7, 28.0, 22.9, 22.8, 22.0, 14.3, 14.2, 14.1, 12.9;

HRMS (ESI<sup>+</sup>): exact mass calculated for  $[\text{M}+\text{H}]^+$  ( $\text{C}_{18}\text{H}_{33}\text{N}_2\text{S}$ ) requires  $m/z$  309.2364, found  $m/z$  309.2356.

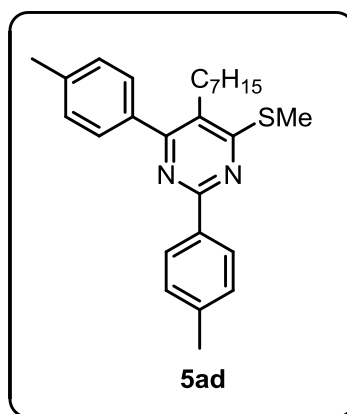

**5-heptyl-4-(methylthio)-2,6-di-p-tolylpyrimidine (5ad)**

IR (neat)  $\nu_{\text{max}}$ : 2924, 2854, 1525, 1504, 1390, 1172, 767;



$^1\text{H-NMR}$  (400 MHz,  $\text{CDCl}_3$ ):  $\delta$  8.41 (d,  $J = 8.2$  Hz, 2H), 7.47 (d,  $J = 8.1$  Hz, 2H), 7.29 (d,  $J = 7.9$  Hz, 2H), 7.26 (d,  $J = 8.0$  Hz, 2H), 2.73 (s, 3H), 2.69 (t,  $J = 8.3$  Hz, 2H), 2.44 (s, 3H), 2.42 (s, 3H), 1.61-1.54 (m, 2H), 1.29-1.23 (br, 8H), 0.87 (t,  $J = 7.1$  Hz, 3H);

$^{13}\text{C-NMR}$  (100 MHz,  $\text{CDCl}_3$ ):  $\delta$  169.6, 163.1, 160.5, 140.4, 138.6, 136.5, 135.5, 129.2 (2C), 129.0 (2C), 128.9 (2C), 128.2 (2C), 127.8, 31.8, 29.8, 28.8, 28.6 (2C), 22.8, 21.6, 21.5, 14.2, 13.3;

HRMS (ESI+): exact mass calculated for  $[\text{M}+\text{H}]^+$  ( $\text{C}_{26}\text{H}_{33}\text{N}_2\text{S}$ ) requires  $m/z$  405.2364, found  $m/z$  405.2370.

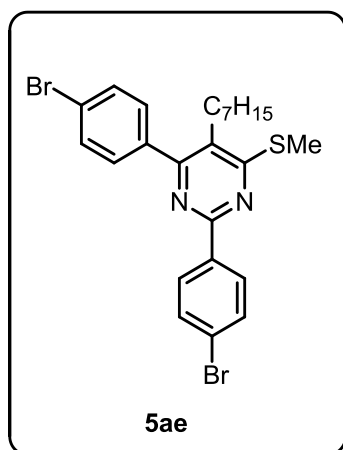

### 2,4-bis(4-bromophenyl)-5-heptyl-6-(methylthio)pyrimidine (5ae)

IR (neat)  $\nu_{\text{max}}$ : 2925, 2854, 1522, 1486, 1389, 1011, 803;

$^1\text{H-NMR}$  (400 MHz,  $\text{CDCl}_3$ ):  $\delta$  8.36 (d,  $J = 8.7$  Hz, 2H), 7.62 (d,  $J = 8.5$  Hz, 2H), 7.57 (d,  $J = 8.7$  Hz, 2H), 7.42 (d,  $J = 8.6$  Hz, 2H), 2.71 (s, 3H), 2.65 (t,  $J = 8.2$  Hz, 2H), 1.58-1.51 (m, 2H), 1.31-1.22 (br, 8H), 0.88 (t,  $J = 7.1$  Hz, 3H);

$^{13}\text{C-NMR}$  (100 MHz,  $\text{CDCl}_3$ ):  $\delta$  170.5, 161.9, 159.7, 138.0, 136.8, 131.7 (2C), 131.6 (2C), 130.6 (2C), 129.8 (2C), 128.4, 125.2, 123.4, 31.8, 29.8, 28.8, 28.6, 28.5, 22.7, 14.2, 13.4;

HRMS (ESI+): exact mass calculated for  $[\text{M}+\text{H}]^+$  ( $\text{C}_{24}\text{H}_{27}\text{Br}_2\text{N}_2\text{S}$ ) requires  $m/z$  533.0262, found  $m/z$  533.0235.

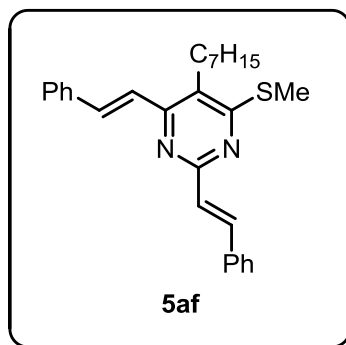

**5-heptyl-4-(methylthio)-2,6-di((E)-styryl)pyrimidine (5af)**

IR (neat)  $\nu_{\max}$ : 2924, 2854, 1633, 1449, 1394, 971, 744;

$^1\text{H-NMR}$  (400 MHz,  $\text{CDCl}_3$ ):  $\delta$  8.09 (d,  $J = 15.6$  Hz, 1H), 8.01 (d,  $J = 15.9$  Hz, 1H), 7.64 (m, 4H), 7.43-7.38 (m, 4H), 7.36-7.31 (m, 2H), 7.27 (d,  $J = 15.5$  Hz, 1H), 7.23 (d,  $J = 15.9$  Hz, 1H), 2.78 (t,  $J = 8.2$  Hz, 2H), 2.66 (s, 3H), 1.67-1.59 (m, 2H), 1.50-1.31 (br, 8H), 0.90 (t,  $J = 6.9$  Hz, 3H);

$^{13}\text{C-NMR}$  (100 MHz,  $\text{CDCl}_3$ ):  $\delta$  169.5, 160.7, 156.5, 137.4, 136.9, 136.7 (2C), 129.1 (2C), 128.9 (2C), 128.8 (2C), 128.5 (2C), 127.8 (2C), 127.7, 127.0, 122.4, 31.9, 29.9, 29.2, 29.1, 27.7, 22.8, 14.2, 13.2;

HRMS (ESI<sup>+</sup>): exact mass calculated for  $[\text{M}+\text{H}]^+$  ( $\text{C}_{28}\text{H}_{33}\text{N}_2\text{S}$ ) requires  $m/z$  429.2364, found  $m/z$  429.2355.

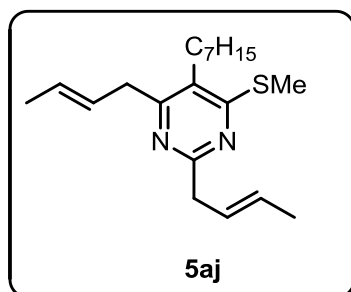

**2,4-di((E)-but-2-en-1-yl)-5-heptyl-6-(methylthio)pyrimidine (5aj)**

IR (neat)  $\nu_{\max}$ : 2926, 2854, 2337, 1536, 1276, 966, 750;

$^1\text{H-NMR}$  (400 MHz,  $\text{CDCl}_3$ ):  $\delta$  5.84-5.78 (m, 1H), 5.63-5.56 (m, 2H), 5.52-5.43 (m, 1H), 3.55 (dd,  $J = 6.8, 1.2$  Hz, 2H), 3.39 (dd,  $J = 6.2, 1.3$  Hz, 2H), 2.59-2.54 (m, 2+3H), 1.70 (dd,  $J = 6.4, 1.4$  Hz, 3H), 1.66 (dd,  $J = 6.3, 1.4$  Hz, 3H), 1.55-1.47 (m, 2H), 1.41-1.26 (br, 8H), 0.89 (t,  $J = 6.9$  Hz, 3H);

$^{13}\text{C-NMR}$  (100 MHz,  $\text{CDCl}_3$ ):  $\delta$  168.7, 165.9, 163.4, 127.9, 127.6, 127.5, 127.3, 127.0, 42.7, 38.3, 31.9, 30.1, 29.1, 28.4, 27.9, 22.8, 18.2, 18.1, 14.2, 12.9;

HRMS (ESI+): exact mass calculated for  $[M+H]^+$  ( $C_{20}H_{33}N_2S$ ) requires  $m/z$  333.2364, found  $m/z$  333.2344.

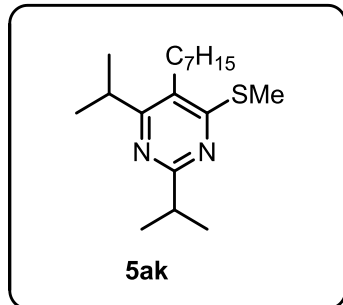

**5-heptyl-2,4-diisopropyl-6-(methylthio)pyrimidine (5ak)**

IR (neat)  $\nu_{\max}$ : 2960, 2925, 1540, 1467, 1400, 1161, 806;

$^1H$ -NMR (400 MHz,  $CDCl_3$ ):  $\delta$  3.13-3.07 (m, 2H), 2.60-2.56 (m, 2H), 2.55 (s, 3H), 1.55-1.48 (m, 2H), 1.45-1.30 (m, 8+6H), 1.22 (d,  $J = 6.7$  Hz, 6H), 0.90 (t,  $J = 7.0$  Hz, 3H);

$^{13}C$ -NMR (100 MHz,  $CDCl_3$ ):  $\delta$  171.2, 169.5, 167.5, 125.7, 37.4, 32.0, 30.6, 30.2, 29.2 (2C), 27.7, 22.8, 22.1 (2C), 21.9 (2C), 14.3, 12.9;

HRMS (ESI+): exact mass calculated for  $[M+H]^+$  ( $C_{18}H_{33}N_2S$ ) requires  $m/z$  309.2364, found  $m/z$  309.2357.

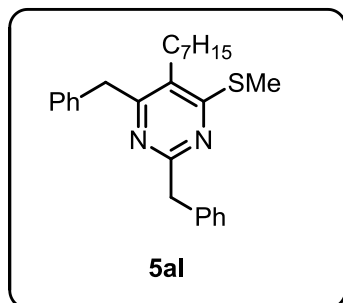

**2,4-dibenzyl-5-heptyl-6-(methylthio)pyrimidine (5al)**

IR (neat)  $\nu_{\max}$ : 2925, 2854, 2328, 1535, 1392, 1276, 750;

$^1H$ -NMR (400 MHz,  $CDCl_3$ ):  $\delta$  7.41 (d,  $J = 7.4$  Hz, 2H), 7.30 (t,  $J = 7.3$  Hz, 2H), 7.24-7.17 (m, 6H), 4.19 (s, 2H), 4.06 (s, 2H), 2.54 (t,  $J = 8.6$  Hz, 2H), 2.47 (s, 3H), 1.33-1.25 (m, 10H), 0.90 (t,  $J = 7.2$  Hz, 3H);

$^{13}C$ -NMR (100 MHz,  $CDCl_3$ ):  $\delta$  169.3, 165.6, 163.2, 139.0, 138.6, 129.6 (2C), 128.8 (2C), 128.5 (2C), 128.3 (2C), 128.1, 126.5, 126.4, 45.8, 41.0, 31.9, 30.1, 29.0, 28.2, 28.1, 22.8, 14.2, 13.0;

HRMS (ESI+): exact mass calculated for  $[M+H]^+$  ( $C_{26}H_{33}N_2S$ ) requires  $m/z$  405.2364, found  $m/z$  405.2359.

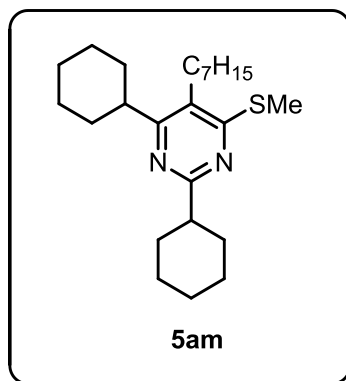

**2,4-dicyclohexyl-5-heptyl-6-(methylthio)pyrimidine (5am)**

IR (neat)  $\nu_{\max}$ : 2923, 2851, 1533, 1449, 1401, 1098, 871;

$^1\text{H-NMR}$  (400 MHz,  $\text{CDCl}_3$ ):  $\delta$  2.77-2.70 (m, 2H), 2.59-2.55 (m, 2H), 2.54 (s, 3H), 2.02-1.99 (br, 2H), 1.83-1.70 (m, 8H), 1.64-1.60 (m, 4H), 1.53-1.27 (m, 16H), 0.90 (t,  $J = 6.9$  Hz, 3H);

$^{13}\text{C-NMR}$  (100 MHz,  $\text{CDCl}_3$ ):  $\delta$  170.2, 168.6, 167.3, 125.9, 47.1, 41.4, 32.0 (2C), 31.9 (2C), 30.0 (2C), 29.2, 29.1, 27.7, 26.7 (2C), 26.4 (2C), 26.1 (2C), 22.8, 14.3, 12.9;

HRMS (ESI<sup>+</sup>): exact mass calculated for  $[\text{M}+\text{H}]^+$  ( $\text{C}_{24}\text{H}_{41}\text{N}_2\text{S}$ ) requires  $m/z$  389.2990, found  $m/z$  389.2990.

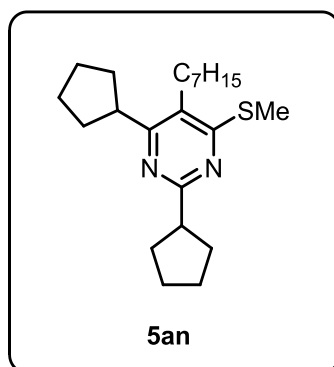

**2,4-dicyclopentyl-5-heptyl-6-(methylthio)pyrimidine (5an)**

IR (neat)  $\nu_{\max}$ : 2924, 2856, 1534, 1463, 1405, 1097, 930;

$^1\text{H-NMR}$  (400 MHz,  $\text{CDCl}_3$ ):  $\delta$  3.27-3.19 (m, 2H), 2.60 (t,  $J = 8.1$  Hz, 2H), 2.53 (s, 3H), 2.03-1.91 (m, 2H), 1.90-1.84 (br, 6H), 1.82-1.77 (m, 2H), 1.69-1.63 (m, 4H), 1.53-1.47 (m, 2H), 1.42-1.29 (br, 10H), 0.91-0.88 (m, 3H);

$^{13}\text{C}$ -NMR (100 MHz,  $\text{CDCl}_3$ ):  $\delta$  170.5, 168.3, 167.2, 126.4, 48.6, 42.1, 33.5 (2C), 32.9 (2C), 32.0, 30.1, 29.2 (2C), 27.9, 26.5 (2C), 26.1 (2C), 22.8, 14.3, 12.9;

HRMS (ESI<sup>+</sup>): exact mass calculated for  $[\text{M}+\text{H}]^+$  ( $\text{C}_{22}\text{H}_{37}\text{N}_2\text{S}$ ) requires  $m/z$  361.2677, found  $m/z$  361.2673.

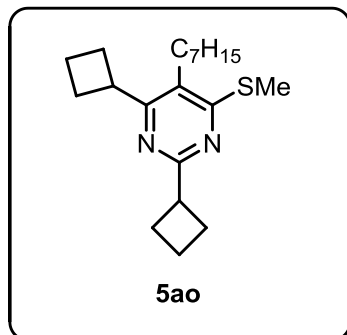

#### 2,4-dicyclobutyl-5-heptyl-6-(methylthio)pyrimidine (5ao)

IR (neat)  $\nu_{\text{max}}$ : 2928, 2856, 1534, 1410, 1307, 1098, 750;

$^1\text{H}$ -NMR (400 MHz,  $\text{CDCl}_3$ ):  $\delta$  3.75-3.66 (m, 2H), 2.57 (s, 3H), 2.55-2.46 (m, 6H), 2.38-2.29 (m, 2H), 2.24-2.16 (m, 2H), 2.07-2.00 (m, 2H), 1.98-1.88 (m, 2H), 1.50-1.29 (br, 10H), 0.90 (t,  $J = 7.0$  Hz, 3H);

$^{13}\text{C}$ -NMR (100 MHz,  $\text{CDCl}_3$ ):  $\delta$  169.1, 167.3, 166.1, 126.3, 43.4, 38.2, 32.0, 30.2, 29.2, 28.8, 28.0 (2C), 27.8, 27.6 (2C), 22.8, 18.6, 18.5, 14.3, 12.9;

HRMS (ESI<sup>+</sup>): exact mass calculated for  $[\text{M}+\text{H}]^+$  ( $\text{C}_{20}\text{H}_{33}\text{N}_2\text{S}$ ) requires  $m/z$  333.2364, found  $m/z$  333.2361.

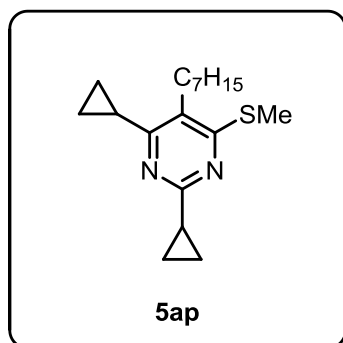

#### 2,4-dicyclopropyl-5-heptyl-6-(methylthio)pyrimidine (5ap)

IR (neat)  $\nu_{\text{max}}$ : 2924, 2853, 1535, 1430, 1310, 919;

$^1\text{H}$ -NMR (400 MHz,  $\text{CDCl}_3$ ):  $\delta$  2.68 (t,  $J = 8.2$  Hz, 2H), 2.49 (s, 3H), 2.08-1.94 (m, 2H), 1.60-1.53 (m, 2H), 1.43-1.28 (br, 8H), 1.14-1.10 (m, 2H), 1.05-1.01 (m, 2H), 0.94-0.87 (m, 7H);

$^{13}\text{C}$ -NMR (100 MHz,  $\text{CDCl}_3$ ):  $\delta$  167.5, 166.6, 165.1, 126.2, 32.0, 30.0, 29.2, 28.8, 27.7, 22.8, 17.9, 14.2, 12.8, 12.7, 9.9 (2C), 9.8 (2C);

HRMS (ESI+): exact mass calculated for  $[\text{M}+\text{H}]^+$  ( $\text{C}_{18}\text{H}_{29}\text{N}_2\text{S}$ ) requires  $m/z$  305.2051, found  $m/z$  305.2045.

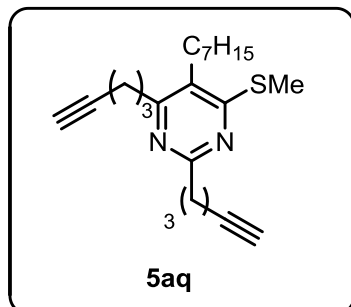

### 5-heptyl-4-(methylthio)-2,6-di(pent-4-yn-1-yl)pyrimidine (5a q)

IR (neat)  $\nu_{\text{max}}$ : 2925, 2853, 2330, 1633, 1555, 1390, 1276, 750;

$^1\text{H}$ -NMR (400 MHz,  $\text{CDCl}_3$ ):  $\delta$  2.93 (t,  $J = 7.3$  Hz, 2H), 2.78 (t,  $J = 7.8$  Hz, 2H), 2.60 (t,  $J = 8.1$  Hz, 2H), 2.54 (s, 3H), 2.29 (qd,  $J = 6.6, 2.2$  Hz, 4H), 2.10-2.02 (m, 2H), 1.99-1.89 (m, 4H), 1.55-1.49 (m, 2H), 1.43-1.29 (br, 8H), 0.89 (t,  $J = 6.9$  Hz, 3H);

$^{13}\text{C}$ -NMR (100 MHz,  $\text{CDCl}_3$ ):  $\delta$  168.4, 166.2, 164.0, 127.5, 84.5, 84.2, 69.0, 68.6, 37.9, 32.8, 32.0, 30.1, 29.1, 28.6, 27.9, 27.7, 27.1, 22.8, 18.4, 18.3, 14.2, 13.0;

HRMS (ESI+): exact mass calculated for  $[\text{M}+\text{H}]^+$  ( $\text{C}_{22}\text{H}_{33}\text{N}_2\text{S}$ ) requires  $m/z$  357.2364, found  $m/z$  357.2345.

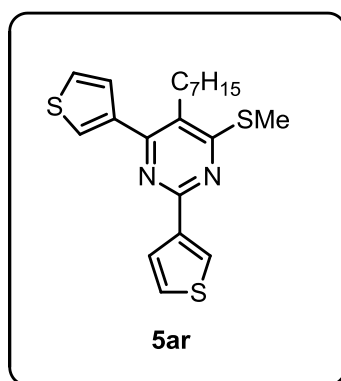

### 5-heptyl-4-(methylthio)-2,6-di(thiophen-3-yl)pyrimidine (5a r)

IR (neat)  $\nu_{\text{max}}$ : 2923, 2852, 1517, 1430, 1343, 1086, 846, 776;

$^1\text{H-NMR}$  (400 MHz,  $\text{CDCl}_3$ ):  $\delta$  8.28 (dd,  $J = 3.2, 1.0$  Hz, 1H), 7.93 (dd,  $J = 5.0, 1.0$  Hz, 1H), 7.68 (dd,  $J = 3.1, 1.2$  Hz, 1H), 7.49 (dd,  $J = 5.0, 1.2$  Hz, 1H), 7.41 (dd,  $J = 3.0, 2.1$  Hz, 1H), 7.34 (dd,  $J = 3.1, 1.9$  Hz, 1H), 2.77 (t,  $J = 8.5$  Hz, 2H), 2.68 (s, 3H), 1.67-1.60 (m, 2H), 1.38-1.29 (br, 8H), 0.90 (t,  $J = 7.0$  Hz, 3H);

$^{13}\text{C-NMR}$  (100 MHz,  $\text{CDCl}_3$ ):  $\delta$  170.1, 157.9, 157.5, 142.1, 140.0, 128.9, 127.7, 127.3 (2C), 126.3, 125.7, 125.6, 31.9, 29.9, 29.0, 28.8, 28.5, 22.8, 14.2, 13.3;

HRMS (ESI+): exact mass calculated for  $[\text{M}+\text{H}]^+$  ( $\text{C}_{20}\text{H}_{25}\text{N}_2\text{S}_3$ ) requires  $m/z$  389.1180, found  $m/z$  389.1179.

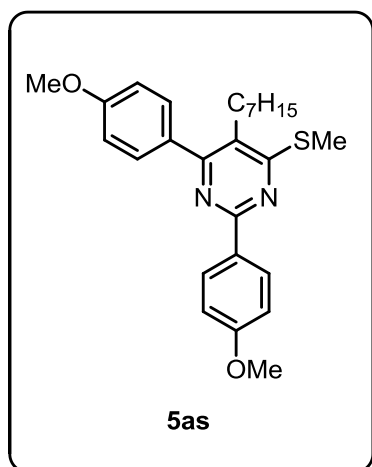

**5-heptyl-2,4-bis(4-methoxyphenyl)-6-(methylthio)pyrimidine (5as)**

IR (neat)  $\nu_{\text{max}}$ : 2925, 2853, 1607, 1503, 1390, 1247, 1163, 1031, 875;

$^1\text{H-NMR}$  (400 MHz,  $\text{CDCl}_3$ ):  $\delta$  8.47 (d,  $J = 8.9$  Hz, 2H), 7.54 (d,  $J = 8.8$  Hz, 2H), 7.01-6.96 (m, 4H), 3.88 (s, 3H), 3.87 (s, 3H), 2.71 (s, 3H), 2.70-2.67 (m, 2H), 1.61-1.54 (m, 2H), 1.30-1.18 (br, 8H), 0.87 (t,  $J = 7.1$  Hz, 3H);

$^{13}\text{C-NMR}$  (100 MHz,  $\text{CDCl}_3$ ):  $\delta$  169.5, 162.5, 161.6, 160.2 (2C), 131.9, 130.9, 130.4 (2C), 129.8 (2C), 127.2, 113.8 (4C), 55.5 (2C), 31.8, 29.8, 28.9, 28.6 (2C), 22.8, 14.2, 13.3;

HRMS (ESI+): exact mass calculated for  $[\text{M}+\text{H}]^+$  ( $\text{C}_{26}\text{H}_{33}\text{N}_2\text{O}_2\text{S}$ ) requires  $m/z$  437.2263, found  $m/z$  437.2261.

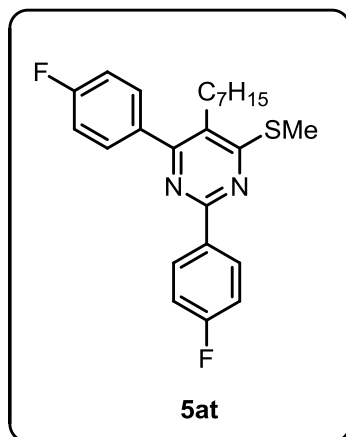

**2,4-bis(4-fluorophenyl)-5-heptyl-6-(methylthio)pyrimidine (5at)**

IR (neat)  $\nu_{\max}$ : 2927, 2856, 1603, 1504, 1390, 1226, 878;

$^1\text{H-NMR}$  (400 MHz,  $\text{CDCl}_3$ ):  $\delta$  8.52-8.48 (m, 2H), 7.56-7.52 (m, 2H), 7.20-7.10 (m, 4H), 2.72 (s, 3H), 2.67 (t,  $J = 8.2$  Hz, 2H), 1.59-1.51 (m, 2H), 1.29-1.21 (br, 8H), 0.87 (t,  $J = 7.1$  Hz, 3H);

$^{13}\text{C-NMR}$  (100 MHz,  $\text{CDCl}_3$ ):  $\delta$  170.3, 165.2 (d,  $J_{\text{F-C}} = 144.1$  Hz), 162.7 (d,  $J_{\text{F-C}} = 142.4$  Hz), 162.0, 159.6, 135.2 (d,  $J_{\text{F-C}} = 3.7$  Hz), 134.1 (d,  $J_{\text{F-C}} = 3.0$  Hz), 130.8 (d,  $J_{\text{F-C}} = 8.1$  Hz, 2C), 130.3 (d,  $J_{\text{F-C}} = 8.1$  Hz, 2C), 128.0, 115.5 ( $J_{\text{F-C}} = 3.6$  Hz, 2C), 115.3 ( $J_{\text{F-C}} = 3.6$  Hz, 2C), 31.8, 29.8, 28.8, 28.6, 28.5, 22.7, 14.2, 13.4;

HRMS (ESI<sup>+</sup>): exact mass calculated for  $[\text{M}+\text{H}]^+$  ( $\text{C}_{24}\text{H}_{27}\text{F}_2\text{N}_2\text{S}$ ) requires  $m/z$  413.1863, found  $m/z$  413.1860.

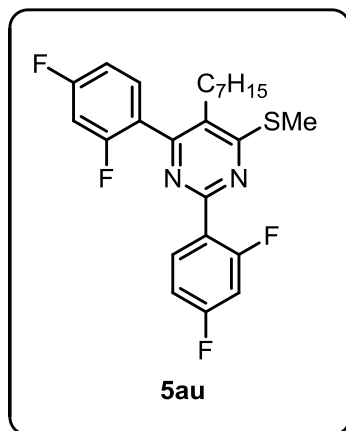

**2,4-bis(2,4-difluorophenyl)-5-heptyl-6-(methylthio)pyrimidine (5au)**

IR (neat)  $\nu_{\max}$ : 2927, 2856, 1600, 1502, 1389, 1267, 1142, 968, 850;



$^1\text{H-NMR}$  (400 MHz,  $\text{CDCl}_3$ ):  $\delta$  8.17-8.11 (m, 1H), 7.42-7.36 (m, 1H), 7.01 (td,  $J = 8.3, 2.3$  Hz, 1H), 6.97-6.88 (m, 3H), 2.67 (s, 3H), 2.56 (t,  $J = 8.2$  Hz, 2H), 1.49-1.42 (m, 2H), 1.26-1.15 (br, 8H), 0.85 (t,  $J = 7.2$  Hz, 3H);

$^{13}\text{C-NMR}$  (100 MHz,  $\text{CDCl}_3$ ):  $\delta$  170.4, 165.0 (dd,  $J_{\text{F-C}} = 57.2, 12$  Hz), 162.8 (td,  $J_{\text{F-C}} = 32.9, 11.8$  Hz), 160.8 (dd,  $J_{\text{F-C}} = 27.9, 12.5$  Hz), 158.9 (d,  $J_{\text{F-C}} = 2.6$  Hz), 158.5 (d,  $J_{\text{F-C}} = 12.5$  Hz), 157.7, 133.2 (dd,  $J_{\text{F-C}} = 10.3, 3.0$  Hz), 132.1 (dd,  $J_{\text{F-C}} = 9.6, 5.1$  Hz), 129.9, 123.0 (dd,  $J_{\text{F-C}} = 5.8, 3.7$  Hz), 122.9 (m), 111.9 (dd,  $J_{\text{F-C}} = 21.3, 3.7$  Hz), 111.4 (dd,  $J_{\text{F-C}} = 21.3, 4.4$  Hz), 105.1 (t,  $J_{\text{F-C}} = 25.6$  Hz), 104.4 (t,  $J_{\text{F-C}} = 25.7$  Hz), 31.7, 29.7, 28.8, 28.6, 27.9, 22.7, 14.2, 13.3;

HRMS (ESI+): exact mass calculated for  $[\text{M}+\text{H}]^+$  ( $\text{C}_{24}\text{H}_{25}\text{F}_4\text{N}_2\text{S}$ ) requires  $m/z$  449.1675, found  $m/z$  449.1667.

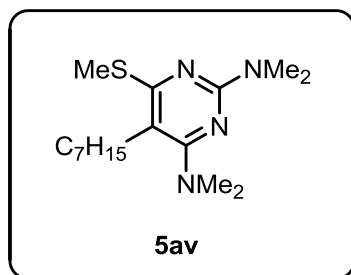

### 2,4-di(dimethylamino)-5-heptyl-6-(methylthio)pyrimidine (5av)

IR (neat)  $\nu_{\text{max}}$ : 2922, 2851, 1550, 1517, 1377, 1136, 970, 795;

$^1\text{H-NMR}$  (400 MHz,  $\text{CDCl}_3$ ):  $\delta$  3.13 (s, 6H), 2.92 (s, 6H), 2.53-2.49 (m+s, 5H), 1.55 (br, 2H), 1.33-1.29 (br, 8H), 0.90-0.87 (br, 3H);

$^{13}\text{C-NMR}$  (100 MHz,  $\text{CDCl}_3$ ):  $\delta$  167.7, 165.3, 159.0, 106.6, 41.5 (2C), 36.8 (2C), 32.1, 30.1, 29.2, 28.8, 28.1, 22.8, 14.3, 13.3;

HRMS (ESI+): exact mass calculated for  $[\text{M}+\text{H}]^+$  ( $\text{C}_{16}\text{H}_{31}\text{N}_4\text{S}$ ) requires  $m/z$  311.2269, found  $m/z$  311.2261.

### General procedure for the synthesis of pyrimidines with acetonitrile

Under Argon, TfOH (0.20 mmol, 1.0 eq.) was slowly added to a cold (0 °C) solution of thio-alkyne (0.2 mmol, 1.0 eq) in acetonitrile (2 mL). The result mixture was warm up to rt and stirred for 16 h at ambient temperature. The reaction was quenched with  $\text{NaHCO}_3$  sat. sol. (5 mL) after cooled to rt, extracted with DCM (3 x 5 mL), dried over  $\text{Na}_2\text{SO}_4$ . 4-Dimethylaminopyridine (12.2 mg, 0.1 mmol) was

added before the filtration. Then the solvent was removed in vacuo. After obtain the crude proton nmr, the crude product was purified by column chromatography on silica gel with hexane/ethyl acetate (5:1).

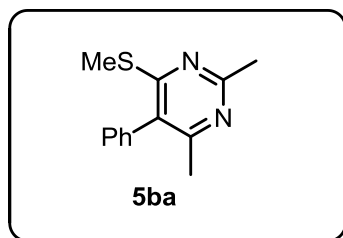

### 2,4-dimethyl-6-(methylthio)-5-phenylpyrimidine (5ba)

IR (neat)  $\nu_{\max}$ : 2925, 2851, 1528, 1404, 1360, 1230, 1006, 859, 659;

$^1\text{H-NMR}$  (400 MHz,  $\text{CDCl}_3$ ):  $\delta$  7.48-7.40 (m, 3H), 7.22-7.20 (m, 2H), 2.68 (s, 3H), 2.45 (s, 3H), 2.18 (s, 3H);

$^{13}\text{C-NMR}$  (100 MHz,  $\text{CDCl}_3$ ):  $\delta$  168.8, 165.6, 161.4, 135.5, 129.6 (2C), 129.1 (2C), 129.0, 128.5, 26.1, 22.4, 13.2;

HRMS (ESI+): exact mass calculated for  $[\text{M}+\text{H}]^+$  ( $\text{C}_{13}\text{H}_{15}\text{N}_2\text{S}$ ) requires  $m/z$  231.0956, found  $m/z$  231.0945.

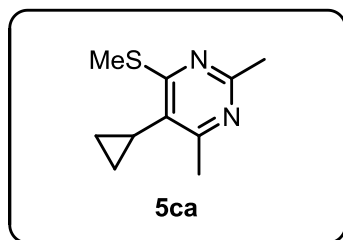

### 5-cyclopropyl-2,4-dimethyl-6-(methylthio)pyrimidine (5ca)

IR (neat)  $\nu_{\max}$ : 2926, 2854, 1530, 1418, 1276, 859;

$^1\text{H-NMR}$  (400 MHz,  $\text{CDCl}_3$ ):  $\delta$  2.58 (s, 3H), 2.52 (s, 3H), 2.51 (s, 3H), 1.60-1.54 (m, 1H), 1.09-1.04 (m, 2H), 0.63-0.59 (m, 2H);

$^{13}\text{C-NMR}$  (100 MHz,  $\text{CDCl}_3$ ):  $\delta$  170.7, 164.2, 163.8, 126.7, 25.8, 22.4, 12.9, 9.3, 8.7 (2C);

HRMS (ESI+): exact mass calculated for  $[\text{M}+\text{H}]^+$  ( $\text{C}_{10}\text{H}_{15}\text{N}_2\text{S}$ ) requires  $m/z$  195.0956, found  $m/z$  195.0952.

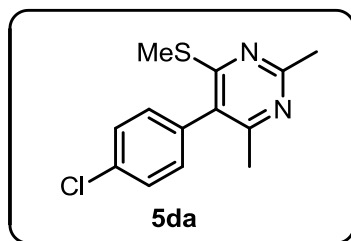

**5-(4-chlorophenyl)-2,4-dimethyl-6-(methylthio)pyrimidine (5da)**

IR (neat)  $\nu_{\max}$ : 2968, 1531, 1408, 1090, 826;

$^1\text{H-NMR}$  (400 MHz,  $\text{CDCl}_3$ ):  $\delta$  7.44 (dt,  $J = 8.5, 2.0$  Hz, 2H), 7.15 (dt,  $J = 8.5, 2.0$  Hz, 2H), 2.68 (s, 3H), 2.46 (s, 3H), 2.17 (s, 3H);

$^{13}\text{C-NMR}$  (100 MHz,  $\text{CDCl}_3$ ):  $\delta$  168.9, 165.9, 161.4, 134.7, 133.8, 131.1 (2C), 129.4 (2C), 127.9, 26.1, 22.3, 13.2;

HRMS (ESI+): exact mass calculated for  $[\text{M}+\text{H}]^+$  ( $\text{C}_{13}\text{H}_{14}\text{ClN}_2\text{S}$ ) requires  $m/z$  265.0566, found  $m/z$  265.0562.

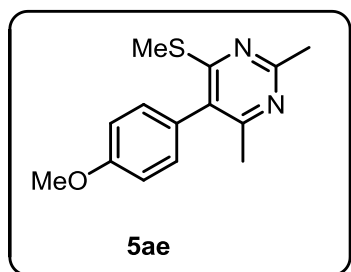

**5-(4-methoxyphenyl)-2,4-dimethyl-6-(methylthio)pyrimidine (5ae)**

IR (neat)  $\nu_{\max}$ : 2926, 2835, 1531, 1408, 1247, 830;

$^1\text{H-NMR}$  (400 MHz,  $\text{CDCl}_3$ ):  $\delta$  7.13 (dt,  $J = 8.8, 2.2$  Hz, 2H), 6.99 (dt,  $J = 8.8, 2.2$  Hz, 2H), 3.86 (s, 3H), 2.67 (s, 3H), 2.45 (s, 3H), 2.19 (s, 3H);

$^{13}\text{C-NMR}$  (100 MHz,  $\text{CDCl}_3$ ):  $\delta$  169.2, 165.4, 161.7, 159.8, 130.8 (2C), 128.7, 127.5, 114.5 (2C), 55.4, 26.1, 22.4, 13.3;

HRMS (ESI+): exact mass calculated for  $[\text{M}+\text{H}]^+$  ( $\text{C}_{14}\text{H}_{17}\text{N}_2\text{OS}$ ) requires  $m/z$  261.1062, found  $m/z$  261.1056.

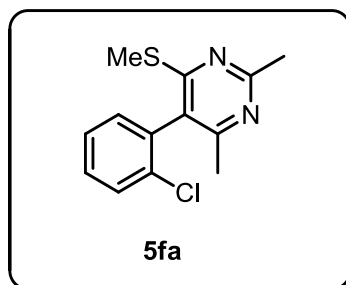

**5-(2-chlorophenyl)-2,4-dimethyl-6-(methylthio)pyrimidine (5fa)**

IR (neat)  $\nu_{\text{max}}$ : 2927, 1534, 1431, 1408, 870, 756;

$^1\text{H-NMR}$  (400 MHz,  $\text{CDCl}_3$ ):  $\delta$  7.54-7.52 (m, 1H), 7.41-7.35 (m, 2H), 7.21-7.19 (m, 1H), 2.70 (s, 3H), 2.48 (s, 3H), 2.15 (s, 3H);

$^{13}\text{C-NMR}$  (100 MHz,  $\text{CDCl}_3$ ):  $\delta$  168.8, 166.3, 162.0, 134.3, 134.2, 131.5, 130.3, 130.2, 127.5, 126.5, 26.2, 22.0, 13.0;

HRMS (ESI+): exact mass calculated for  $[\text{M}+\text{H}]^+$  ( $\text{C}_{13}\text{H}_{14}\text{ClN}_2\text{S}$ ) requires  $m/z$  265.0566, found  $m/z$  265.0563.

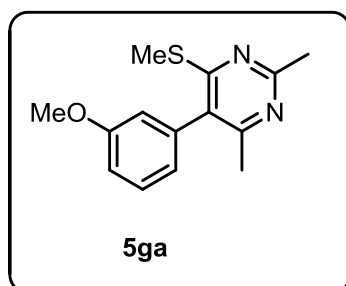

**5-(3-methoxyphenyl)-2,4-dimethyl-6-(methylthio)pyrimidine (5ga)**

IR (neat)  $\nu_{\text{max}}$ : 2926, 2834, 1579, 1532, 1426, 1288, 995, 863;

$^1\text{H-NMR}$  (400 MHz,  $\text{CDCl}_3$ ):  $\delta$  7.38 (t,  $J = 7.9$  Hz, 1H), 6.96 (ddd,  $J = 8.4, 2.7, 0.9$  Hz, 1H), 6.80-6.75 (m, 2H), 3.83 (s, 3H), 2.67 (s, 3H), 2.45 (s, 3H), 2.20 (s, 3H);

$^{13}\text{C-NMR}$  (100 MHz,  $\text{CDCl}_3$ ):  $\delta$  168.7, 165.6, 161.3, 160.1, 136.8, 130.2, 128.9, 121.9, 115.3, 113.9, 55.4, 26.1, 22.4, 13.2;

HRMS (ESI+): exact mass calculated for  $[\text{M}+\text{H}]^+$  ( $\text{C}_{14}\text{H}_{17}\text{N}_2\text{SO}$ ) requires  $m/z$  261.1062, found  $m/z$  261.1056.

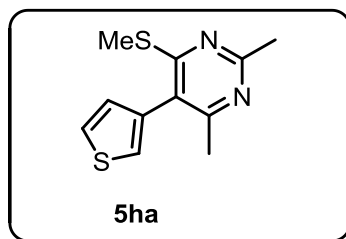

**2,4-dimethyl-6-(methylthio)-5-(thiophen-3-yl)pyrimidine (5ha)**

IR (neat)  $\nu_{\max}$ : 2925, 2854, 1522, 1420, 1346, 1274, 1182, 854, 787;

$^1\text{H-NMR}$  (400 MHz,  $\text{CDCl}_3$ ):  $\delta$  7.45 (dd,  $J = 4.9, 3.0$  Hz, 1H), 7.24 (dd,  $J = 2.9, 1.3$  Hz, 1H), 7.00 (dd,  $J = 4.9, 1.2$  Hz, 1H), 2.66 (s, 3H), 2.46 (s, 3H), 2.23 (s, 3H);

$^{13}\text{C-NMR}$  (100 MHz,  $\text{CDCl}_3$ ):  $\delta$  169.5, 165.6, 162.1, 134.9, 128.5, 126.4, 125.2, 124.4, 26.1, 22.4, 13.2;

HRMS (ESI+): exact mass calculated for  $[\text{M}+\text{H}]^+$  ( $\text{C}_{11}\text{H}_{13}\text{N}_2\text{S}_2$ ) requires  $m/z$  237.0520, found  $m/z$  237.0511.

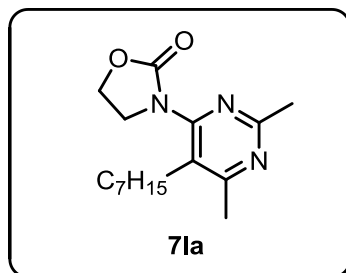

**3-(5-heptyl-2,6-dimethylpyrimidin-4-yl)oxazolidin-2-one (7la)**

IR (neat)  $\nu_{\max}$ : 2924, 2855, 1765, 1568, 1398, 1213, 1037, 761;

$^1\text{H-NMR}$  (400 MHz,  $\text{CDCl}_3$ ):  $\delta$  4.49 (t,  $J = 8.1$  Hz, 2H), 4.16 (t,  $J = 8.1$  Hz, 2H), 2.67 (t,  $J = 8.0$  Hz, 2H), 2.56 (s, 3H), 2.51 (s, 3H), 1.46-1.39 (m, 2H), 1.28-1.23 (br, 8H), 0.84 (t,  $J = 7.1$  Hz, 3H);

$^{13}\text{C-NMR}$  (100 MHz,  $\text{CDCl}_3$ ):  $\delta$  168.6, 164.5, 156.1, 155.8, 125.7, 63.0, 45.9, 31.8, 29.7, 29.1, 29.0, 27.0, 25.3, 22.7, 22.4, 14.1;

HRMS (ESI+): exact mass calculated for  $[\text{M}+\text{Na}]^+$  ( $\text{C}_{16}\text{H}_{25}\text{N}_3\text{NaO}_2$ ) requires  $m/z$  314.1844, found  $m/z$  314.1835.

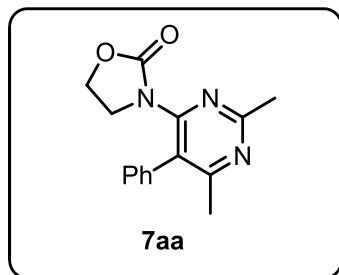

**3-(2,6-dimethyl-5-phenylpyrimidin-4-yl)oxazolidin-2-one (7aa)**

IR (neat)  $\nu_{\max}$ : 2919, 2853, 1775, 1569, 1410, 1262, 1082, 758;

$^1\text{H-NMR}$  (400 MHz,  $\text{CDCl}_3$ ):  $\delta$  7.45-7.37 (m, 3H), 7.27-7.24 (m, 2H, overlapping with solvent), 4.30 (t,  $J = 8.1$  Hz, 2H), 3.94 (t,  $J = 7.4$  Hz, 2H), 2.71 (s, 3H), 2.36 (s, 3H);

$^{13}\text{C-NMR}$  (100 MHz,  $\text{CDCl}_3$ ):  $\delta$  168.1, 166.5, 156.0, 154.8, 134.7, 129.5 (2C), 128.7 (2C), 128.2, 126.7, 62.7, 45.8, 25.8, 23.3;

HRMS (ESI+): exact mass calculated for  $[\text{M}+\text{Na}]^+$  ( $\text{C}_{15}\text{H}_{15}\text{N}_3\text{NaO}_2$ ) requires  $m/z$  292.1062, found  $m/z$  292.1056.

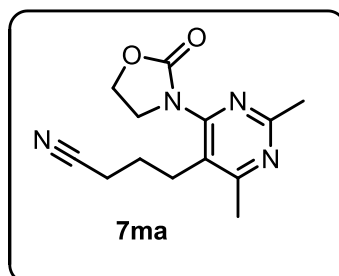

**4-(2,4-dimethyl-6-(2-oxooxazolidin-3-yl)pyrimidin-5-yl)butanenitrile (7ma)**

IR (neat)  $\nu_{\max}$ : 3398, 2926, 2246, 1760, 1569, 1401, 1222, 1035, 761;

$^1\text{H-NMR}$  (400 MHz,  $\text{CDCl}_3$ ):  $\delta$  4.53 (t,  $J = 8.1$  Hz, 2H), 4.21 (t,  $J = 7.52$  Hz, 2H), 2.84 (t,  $J = 8.0$  Hz, 2H), 2.58 (s, 3H), 2.54 (s, 3H), 2.35 (t,  $J = 6.8$  Hz, 2H), 1.96-1.89 (m, 2H);

$^{13}\text{C-NMR}$  (100 MHz,  $\text{CDCl}_3$ ):  $\delta$  168.6, 165.3, 156.5, 156.1, 122.8, 119.3, 63.2, 45.9, 26.3, 25.4, 24.3, 22.5, 17.3;

HRMS (ESI+): exact mass calculated for  $[\text{M}+\text{Na}]^+$  ( $\text{C}_{13}\text{H}_{16}\text{N}_4\text{NaO}_2$ ) requires  $m/z$  283.1171, found  $m/z$  283.1166.

## Further manipulation of isoquinoline and pyrimidine products.

Compound **3di** (212 mg, 0.5 mmol) was dissolved in AcOH (10 mL). The solution was submitted to a pre-set H-Cube reactor cyclically (H<sub>2</sub> 100 bar, 40 °C) and was analyzed by TLC. After completely consuming of the starting material (1 h), the reactor was rinsed in succession by AcOH (10 mL) and Methonal (10 mL). Combined solution was evaporated under vacuum. The crude product was protected by TsCl in DCM, with triethylamine as the base. After filtration, the residue was purified by flash column chromatography (Hexane/ethyl acetate = 1:1) on silica gel to afford compound *rac*-**8-Ts** (246 mg, 99%).

Compound **3hi** (117 mg, 0.25 mmol) was dissolved in AcOH (10 mL). The solution was submitted to a pre-set H-Cube reactor cyclically (H<sub>2</sub> 100 bar, 40 °C) and was analyzed by TLC. After completely consuming of the starting material (1 h), the reactor was rinsed in succession by AcOH (10 mL) and Methonal (10 mL). Combined solution was evaporated under vacuum. The crude product was protected by TsCl in DCM, with triethylamine as the base. After filtration, the residue was purified by flash column chromatography (Hexane/ethyl acetate = 1:1) on silica gel to afford compound (*S*)-**8-Ts** (74 mg, 60%).

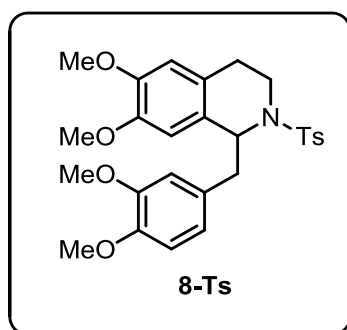

### 1-(3,4-dimethoxybenzyl)-6,7-dimethoxy-2-tosyl-1,2,3,4-tetrahydroisoquinoline (**8**)

IR (neat)  $\nu_{\max}$ : 3622, 2935, 2834, 1513, 1462, 1317, 1229, 1153, 1091, 1025, 973, 810, 72.9;

<sup>1</sup>H-NMR (400 MHz, CDCl<sub>3</sub>):  $\delta$  7.53 (d,  $J$  = 8.3 Hz, 2H), 7.14 (d,  $J$  = 18.0 Hz, 2H), 6.72 (d,  $J$  = 1 Hz, 1H), 6.56 (dd,  $J$  = 8.0, 1.9 Hz, 1H), 6.51 (d,  $J$  = 1.9 Hz, 1H), 6.44 (s, 1H), 6.20 (s, 1H), 5.09 (t,  $J$  = 6.5 Hz, 1H), 3.85 (s, 3H), 3.80 (s, 3H), 3.75 (s, 3H), 3.67 (s, 3H), 3.62 (ddd,  $J$  = 13.4, 5.9, 3.8 Hz, 1H), 3.34 (ddd,  $J$  = 14.9, 10.3, 4.7 Hz, 1H), 3.13 (dd,  $J$  = 13.5, 5.8 Hz, 1H), 3.02 (dd,  $J$  = 13.5, 7.1 Hz, 1H), 2.60 (ddd,  $J$  = 16.3, 10.3, 6.1 Hz, 1H), 2.39 (dt,  $J$  = 16.2, 4.3 Hz, 1H), 2.35 (s, 3H);

<sup>13</sup>C-NMR (100 MHz, CDCl<sub>3</sub>):  $\delta$  148.8, 148.0, 147.9, 147.0, 143.2, 137.5, 130.3, 129.5 (2C), 127.6, 127.2 (2C), 125.7, 122.3, 113.2, 111.4, 111.1, 110.5, 57.7, 56.0, 56.0, 55.9, 55.9, 44.1, 40.0, 27.1, 21.6;

HRMS (ESI<sup>+</sup>): exact mass calculated for [M+Na]<sup>+</sup> (C<sub>27</sub>H<sub>31</sub>NNaO<sub>6</sub>S) requires  $m/z$  520.1770, found  $m/z$  520.1767.

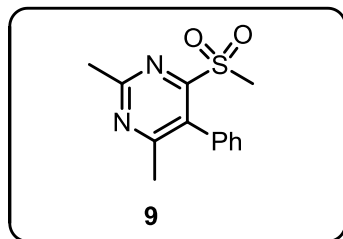

### 2,4-dimethyl-6-(methylsulfonyl)-5-phenylpyrimidine (**9**)

To a solution of **5ba** (23 mg, 0.1 mmol) in DCM (3 mL) was slowly added 3-chloroperoxybenzoic acid (70% purity) (51.8 mg, 0.21 mmol). The resulting mixture was stirred at room temperature for 5 h before quenching with 5 mL Na<sub>2</sub>S<sub>2</sub>O<sub>3</sub> (5%) solution. The layers were shaken and separated. The aqueous phase was extracted with DCM (2X5 mL). The combined organic layers were washed with saturated NaHCO<sub>3</sub> solution (5 mL) and dried over MgSO<sub>4</sub>. The solvent was removed under vacuum. The crude product was purified by flash column chromatography (Hexane/ethyl acetate = 1:1) on silica gel to afford the title compound (25.7 mg, 98%) as white solid.

IR (neat)  $\nu_{\max}$ : 2929, 2363, 2339, 1561, 1412, 1310, 1130, 748;

<sup>1</sup>H-NMR (400 MHz, CDCl<sub>3</sub>):  $\delta$  7.50-7.45 (m, 3H), 7.31-7.28 (m, 2H), 3.26 (s, 3H), 2.80 (s, 3H), 2.35 (s, 3H);

<sup>13</sup>C-NMR (100 MHz, CDCl<sub>3</sub>):  $\delta$  170.5, 166.3, 162.5, 132.1, 129.7 (2C), 129.0, 128.6 (2C), 127.9, 40.2, 25.9, 23.4;

HRMS (ESI<sup>+</sup>): exact mass calculated for [M+Na]<sup>+</sup> (C<sub>13</sub>H<sub>14</sub>N<sub>2</sub>SNaO<sub>2</sub>) requires  $m/z$  285.0674, found  $m/z$  285.0662.

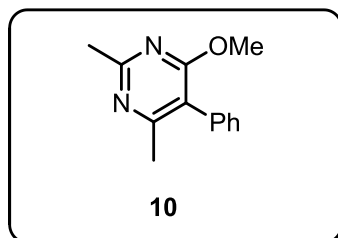

### 4-methoxy-2,6-dimethyl-5-phenylpyrimidine (**10**)

To a solution of sodium methoxide (21.6 mg, 0.4 mmol) in methanol (2 mL) was added **9** (26.2 mg, 0.1 mmol). The resulting mixture was heated to reflux for 24 h. The solvent was removed under vacuum. The residue was diluted with water (5 mL) and then extracted with DCM (3X5 mL). The combined organic layers were dried over MgSO<sub>4</sub>. The solvent was removed under vacuum. The crude product was



purified by flash column chromatography (Hexane/ethyl acetate = 1:1) on silica gel to afford the title compound (18.6 mg, 87%) as white solid.

IR (neat)  $\nu_{\text{max}}$ : 2952, 2926, 1574, 1551, 1418, 1389, 1096, 701;

$^1\text{H-NMR}$  (400 MHz,  $\text{CDCl}_3$ ):  $\delta$  7.45-7.35 (m, 3H), 7.24-7.22 (m, 2H), 3.89 (s, 3H), 2.63 (s, 3H), 2.26 (s, 3H);

$^{13}\text{C-NMR}$  (100 MHz,  $\text{CDCl}_3$ ):  $\delta$  166.9, 165.8, 164.4, 134.2, 130.1 (2C), 128.5 (2C), 127.8, 118.0, 54.0, 26.0, 22.4;

HRMS (ESI+): exact mass calculated for  $[\text{M}+\text{H}]^+$  ( $\text{C}_{13}\text{H}_{15}\text{N}_2\text{O}$ ) requires  $m/z$  215.1184, found  $m/z$  215.1178.

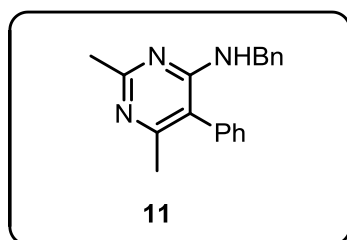

#### **N-benzyl-2,6-dimethyl-5-phenylpyrimidin-4-amine (11)**

Compound **9** (26.2 mg, 0.1 mmol) was mixed with benzyl amine (0.44 mL, 4 mmol) under Argon. The mixture was stirred at 110 °C for 12 h. The result mixture was transferred to a column with silica gel (Hexane/ethyl acetate = 5:7) to afford the title compound (27.8 mg, 96%) as white solid.

IR (neat)  $\nu_{\text{max}}$ : 3432, 2921, 2852, 1564, 1498, 1431, 1139, 699;

$^1\text{H-NMR}$  (400 MHz,  $\text{CDCl}_3$ ):  $\delta$  7.45 (t,  $J = 7.6$  Hz, 2H), 7.37 (tt,  $J = 7.4, 1.3$  Hz, 1H), 7.30-7.27 (m, 2H), 7.23-7.21 (m, 5H), 4.69 (br, 1H), 4.64 (d,  $J = 5.6$  Hz, 2H), 2.55 (s, 3H), 2.11 (s, 3H);

$^{13}\text{C-NMR}$  (100 MHz,  $\text{CDCl}_3$ ):  $\delta$  166.0, 161.0, 160.3, 139.4, 134.8, 130.1 (2C), 129.7 (2C), 128.6 (2C), 128.3, 127.5 (2C), 127.2, 114.8, 44.7, 26.3, 22.3;

HRMS (ESI+): exact mass calculated for  $[\text{M}+\text{H}]^+$  ( $\text{C}_{19}\text{H}_{20}\text{N}_3$ ) requires  $m/z$  290.1657, found  $m/z$  290.1653.

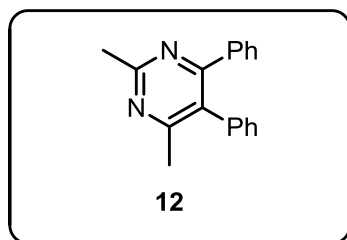

### 2,4-dimethyl-5,6-diphenylpyrimidine (12)

To a solution of compound **9** (26.2 mg, 0.1 mmol) in THF (2 mL) was added 0.1 mL (0.2 mmol) phenylmagnesium chloride solution (2 mol/L in THF). The resulting mixture was refluxed for 24 h before quenching with saturated  $\text{NH}_4\text{Cl}$  (5 mL) at rt. The mixture was extracted with MTBE (3X10 mL). The combined organic layers were dried over  $\text{MgSO}_4$ . The solvent was removed under vacuum. The crude product was purified by flash column chromatography (Hexane/ethyl acetate = 1:1) on silica gel to afford the title compound (18.5 mg, 71%) as white solid.

IR (neat)  $\nu_{\text{max}}$ : 2923, 2853, 1533, 1407, 1177, 993, 755;

$^1\text{H-NMR}$  (400 MHz,  $\text{CDCl}_3$ ):  $\delta$  7.31-7.28 (m, 5H), 7.23-7.16 (m, 3H), 7.10-7.08 (m, 2H), 2.80 (s, 3H), 2.37 (s, 3H);

$^{13}\text{C-NMR}$  (100 MHz,  $\text{CDCl}_3$ ):  $\delta$  166.3, 166.0, 163.9, 138.5, 136.9, 130.2 (2C), 129.8 (2C), 129.6 (2C), 128.7 (2C), 128.0 (2C), 127.7, 26.2, 23.6;

HRMS (ESI+): exact mass calculated for  $[\text{M}+\text{H}]^+$  ( $\text{C}_{18}\text{H}_{17}\text{N}_2$ ) requires  $m/z$  261.1392, found  $m/z$  261.1380.

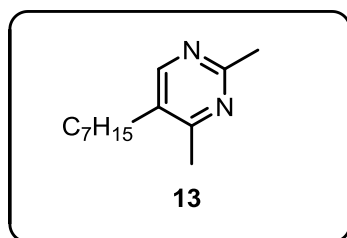

### 5-heptyl-2,4-dimethylpyrimidine (13)

To a solution of **5aa** (23.8 mg, 0.1 mmol) in acetone (2 mL) was added an excess of Raney 2800 Ni (washed with acetone three times *just prior to use*; Caution! Raney Ni is pyrophoric if allowed to dry out). The resulting mixture was stirred vigorously at room temperature for 6 h under an atmosphere of  $\text{H}_2$  (balloon). The mixture was diluted with ethyl acetate and filtrated. The Raney Ni was washed with ethyl acetate. The combined solution was concentrated and purified by flash column chromatography (Hexane/ethyl acetate = 5:1) on silica gel to afford the title compound (17.9 mg, 87%) as colorless oil.

IR (neat)  $\nu_{\text{max}}$ : 2925, 2855, 1582, 1552, 1437, 1030, 936;

$^1\text{H-NMR}$  (400 MHz,  $\text{CDCl}_3$ ):  $\delta$  8.28 (s, 1H), 2.65 (s, 3H), 2.54 (t,  $J = 7.9$  Hz, 2H), 2.46 (s, 3H), 1.59-1.51 (m, 2H), 1.34-1.27 (br, 8H), 0.88 (t,  $J = 7.0$  Hz, 3H);

$^{13}\text{C}$ -NMR (100 MHz,  $\text{CDCl}_3$ ):  $\delta$  165.3, 165.1, 156.5, 130.1, 31.9, 29.8, 29.7, 29.5, 29.2, 25.7, 22.8, 21.7, 14.2;

HRMS (ESI+): exact mass calculated for  $[\text{M}+\text{H}]^+$  ( $\text{C}_{13}\text{H}_{23}\text{N}_2$ ) requires  $m/z$  207.1861, found  $m/z$  207.1851

### Kinetic isotope effect.

Under Argon atmosphere, mixture of **1a** (0.22 mmol, 1.1 eq.) and  $\text{CH}_3\text{CN}$  (0.1 mmol, 1.0 eq.) and  $\text{CH}_3^{13}\text{CN}$  (0.1 mmol, 1.0 eq.) in dichloroethane (4 mL) was added dropwise of TfOH (0.22 mmol, 1.1 eq.) at 0 °C. The reaction was warm up immediately to RT for 30 min. Then the reaction refluxed at 115 °C for 16 h. The reaction was quenched with  $\text{Na}_2\text{CO}_3$  sat. sol. (5 mL) after cooled to rt, extracted with DCM (3 x 5 mL), dried over  $\text{Na}_2\text{SO}_4$  and the solvent was removed in vacuo. The crude product was purified by column chromatography on silica gel with hexane/ethyl acetate (7/3). The result was shown in Supplementary Figure 61.

### Crystal data of compound 5ae.

The X-ray intensity data were measured on a Bruker D8-Venture equipped with multilayer monochromators, Mo K $\alpha$  INCOATEC micro focus sealed tube and Kryoflex II cooling device. The structure was solved by direct methods and refined by full-matrix least-squares techniques. Non-hydrogen atoms were refined with anisotropic displacement parameters. Hydrogen atoms were inserted at calculated positions and refined with a riding model respectively as rotating systems. The following software were used: Frame integration, *Bruker SAINT software package*<sup>i</sup> using a narrow-frame algorithm, Absorption correction, *SADABS*<sup>ii</sup>, structure solution, *SHELXS-97*<sup>iii</sup>, refinement, *SHELXL-2013*<sup>iv</sup>, *OLEX2*<sup>v</sup>, *SHELXLE*<sup>vi</sup>, molecular diagram, *OLEX2*<sup>vii</sup>. Experimental data and CCDC-Code can be found in Supplementary Table 3. Crystal data, data collection parameters, and structure refinement details are given in Supplementary Tables 4 and 5. Molecular Structure in “Ortep View” is displayed in Supplementary Figure 64.



## Computational details.

DFT calculations were carried out at with the B3LYP functional<sup>viii</sup> and the 6-31G\* basis set,<sup>ix</sup> as implemented in the Gaussian 09 suite.<sup>x</sup> The nature of the optimized structures, intermediates and transition states, was assessed through frequency calculations. Reported energies are enthalpic values at room temperature. 3D structures were generated using the Chemcraft software.<sup>xi</sup> Result was shown in Supplementary Figures 65.

### Cartesian coordinates and energies for all the structures appearing in Supplementary Figures 66 and 67.

Acetonitrile

E = -132.7549284  
H = -132.704747  
G = -132.733302

xyz

|   |              |              |              |
|---|--------------|--------------|--------------|
| 7 | 0.000245000  | 1.440782000  | 0.000000000  |
| 6 | 0.000000000  | 0.280520000  | 0.000000000  |
| 6 | -0.000174000 | -1.180918000 | 0.000000000  |
| 1 | 1.026202000  | -1.561139000 | 0.000000000  |
| 1 | -0.513435000 | -1.560972000 | 0.888906000  |
| 1 | -0.513435000 | -1.560972000 | -0.888906000 |

TfOH

E = -961.9991175  
H = -961.951767  
G = -961.993766

xyz

|    |              |              |              |
|----|--------------|--------------|--------------|
| 16 | 0.852895000  | -0.148471000 | 0.075889000  |
| 6  | -1.008549000 | 0.009452000  | -0.001823000 |
| 9  | -1.543022000 | -0.924677000 | 0.779534000  |
| 9  | -1.361344000 | 1.219398000  | 0.436727000  |
| 9  | -1.424560000 | -0.153419000 | -1.252832000 |
| 8  | 1.260898000  | 0.173359000  | 1.435985000  |
| 8  | 1.215893000  | -1.372425000 | -0.605998000 |
| 8  | 1.256911000  | 1.097896000  | -0.897986000 |

1 1.495691000 1.856471000 -0.330144000

Starting oxazolidinone derivative

E = -629.7321335

H = -629.540830

G = -629.594141

xyz

|   |              |              |              |
|---|--------------|--------------|--------------|
| 6 | 1.973118000  | -0.082504000 | 0.016293000  |
| 6 | 2.635412000  | 1.161405000  | 0.016604000  |
| 6 | 4.026489000  | 1.215518000  | 0.002568000  |
| 6 | 4.781191000  | 0.039934000  | -0.013534000 |
| 6 | 4.132341000  | -1.196977000 | -0.014694000 |
| 6 | 2.741596000  | -1.263027000 | 0.000905000  |
| 6 | 0.548630000  | -0.139514000 | 0.031465000  |
| 6 | -0.663994000 | -0.159848000 | 0.039859000  |
| 7 | -2.007044000 | -0.230331000 | 0.066543000  |
| 6 | -2.841800000 | 0.895613000  | -0.014052000 |
| 8 | -4.131685000 | 0.453500000  | -0.080545000 |
| 6 | -4.187625000 | -0.966839000 | 0.134382000  |
| 6 | -2.759040000 | -1.469103000 | -0.134266000 |
| 8 | -2.513561000 | 2.049727000  | -0.028733000 |
| 1 | 2.047319000  | 2.073783000  | 0.027941000  |
| 1 | 4.523899000  | 2.181743000  | 0.003493000  |
| 1 | 5.866556000  | 0.087500000  | -0.025106000 |
| 1 | 4.712068000  | -2.116181000 | -0.027138000 |
| 1 | 2.237868000  | -2.225048000 | 0.001037000  |
| 1 | -4.929797000 | -1.387065000 | -0.546521000 |
| 1 | -4.496921000 | -1.151120000 | 1.168909000  |
| 1 | -2.625403000 | -1.842404000 | -1.157420000 |
| 1 | -2.442228000 | -2.242652000 | 0.570054000  |

Starting methylthio derivative

E = -745.9020589

H = -745.751504

G = -745.800432

xyz

|   |             |              |              |
|---|-------------|--------------|--------------|
| 6 | 0.999151000 | -0.085889000 | -0.009351000 |
| 6 | 1.835737000 | -1.219207000 | 0.040166000  |
| 6 | 3.219988000 | -1.071288000 | 0.050331000  |
| 6 | 3.796181000 | 0.200878000  | 0.014875000  |

|    |              |              |              |
|----|--------------|--------------|--------------|
| 6  | 2.974790000  | 1.329854000  | -0.032682000 |
| 6  | 1.589374000  | 1.193510000  | -0.046538000 |
| 6  | -0.418232000 | -0.232894000 | -0.021905000 |
| 6  | -1.630251000 | -0.354912000 | -0.031057000 |
| 16 | -3.299247000 | -0.620804000 | -0.055413000 |
| 1  | 1.387591000  | -2.207573000 | 0.069755000  |
| 1  | 3.852252000  | -1.954433000 | 0.087531000  |
| 1  | 4.876947000  | 0.311591000  | 0.024170000  |
| 1  | 3.415331000  | 2.322961000  | -0.060819000 |
| 1  | 0.950832000  | 2.070773000  | -0.085852000 |
| 6  | -3.940175000 | 1.095192000  | 0.108507000  |
| 1  | -3.608001000 | 1.708574000  | -0.731266000 |
| 1  | -3.616107000 | 1.535488000  | 1.053478000  |
| 1  | -5.030278000 | 1.014015000  | 0.095525000  |

#### A) Isoquinoline route

##### A.1) Oxazolidinone derivative pathway

Starting oxazolidinone derivative + acetonitrile + TfOH system (pre-association complex in Scheme X1)

(I)

E = -1724.5233642

H = -1724.230116

G = -1724.323719

xyz

|    |              |              |              |
|----|--------------|--------------|--------------|
| 6  | 3.400951000  | -1.188828000 | 0.045578000  |
| 6  | 4.528559000  | -1.939621000 | 0.366239000  |
| 6  | 5.766091000  | -1.316305000 | 0.545553000  |
| 6  | 5.872314000  | 0.068571000  | 0.397779000  |
| 6  | 4.753040000  | 0.828704000  | 0.068473000  |
| 6  | 3.501915000  | 0.208120000  | -0.110026000 |
| 6  | 2.344881000  | 0.972725000  | -0.443334000 |
| 6  | 1.336602000  | 1.585208000  | -0.720322000 |
| 7  | -1.329736000 | 3.443051000  | 2.277960000  |
| 6  | -1.637903000 | 2.492050000  | 2.867740000  |
| 6  | -2.027413000 | 1.291296000  | 3.600653000  |
| 8  | -2.137536000 | -0.417888000 | 0.776928000  |
| 16 | -2.574801000 | -1.584594000 | 0.009021000  |
| 8  | -3.694625000 | -2.401253000 | 0.437241000  |
| 6  | -1.085296000 | -2.706105000 | -0.100799000 |
| 9  | -0.082246000 | -2.065900000 | -0.710233000 |
| 8  | -2.781562000 | -1.206642000 | -1.519804000 |
| 9  | -0.708517000 | -3.037650000 | 1.136110000  |

|   |              |              |              |
|---|--------------|--------------|--------------|
| 9 | -1.386525000 | -3.807524000 | -0.783528000 |
| 1 | 2.435788000  | -1.666707000 | -0.088838000 |
| 1 | 4.440031000  | -3.016647000 | 0.480286000  |
| 1 | 6.642485000  | -1.906458000 | 0.798705000  |
| 1 | 6.832150000  | 0.559100000  | 0.535426000  |
| 1 | 4.835200000  | 1.904569000  | -0.052843000 |
| 1 | -1.247764000 | 1.019571000  | 4.319211000  |
| 1 | -2.961342000 | 1.467565000  | 4.143482000  |
| 1 | -2.170843000 | 0.468011000  | 2.893868000  |
| 1 | -2.155750000 | -0.450716000 | -1.785727000 |
| 7 | 0.214536000  | 2.270439000  | -1.012701000 |
| 8 | -0.952176000 | 0.560923000  | -2.051863000 |
| 6 | -0.877486000 | 1.707043000  | -1.633382000 |
| 6 | 0.006794000  | 3.698901000  | -0.734409000 |
| 1 | 0.223087000  | 3.922269000  | 0.311535000  |
| 1 | 0.639308000  | 4.306930000  | -1.390293000 |
| 8 | -1.859344000 | 2.613595000  | -1.741303000 |
| 6 | -1.497471000 | 3.832876000  | -1.039662000 |
| 1 | -2.087162000 | 3.882070000  | -0.122943000 |
| 1 | -1.737895000 | 4.671483000  | -1.694237000 |

Protonation TS (II<sub>i</sub>)

E = -1724.5053961

H = -1724.217996

G = -1724.308264

$\bar{u} = -957.2 \text{ cm}^{-1}$

xyz

|    |              |              |              |
|----|--------------|--------------|--------------|
| 6  | 4.274711000  | 1.028340000  | 0.310182000  |
| 6  | 5.588749000  | 0.685505000  | 0.610234000  |
| 6  | 5.900747000  | -0.618408000 | 1.007581000  |
| 6  | 4.892104000  | -1.578423000 | 1.100344000  |
| 6  | 3.573612000  | -1.242705000 | 0.797706000  |
| 6  | 3.250872000  | 0.066158000  | 0.401462000  |
| 6  | 1.869904000  | 0.410583000  | 0.092848000  |
| 6  | 1.142222000  | 1.389920000  | -0.215005000 |
| 7  | -3.279744000 | 2.251239000  | 2.358786000  |
| 6  | -3.625555000 | 1.175970000  | 2.628134000  |
| 6  | -4.054563000 | -0.178092000 | 2.966004000  |
| 8  | 0.337702000  | -1.688050000 | 0.319514000  |
| 16 | -1.197895000 | -1.505413000 | 0.215848000  |
| 8  | -1.903572000 | -2.207754000 | 1.287789000  |
| 6  | -1.572107000 | -2.444559000 | -1.349068000 |
| 9  | -0.908061000 | -1.902958000 | -2.372369000 |
| 8  | -1.552463000 | -0.104396000 | -0.060524000 |



|   |              |              |              |
|---|--------------|--------------|--------------|
| 9 | -1.215718000 | -3.722759000 | -1.217262000 |
| 9 | -2.884477000 | -2.374373000 | -1.590309000 |
| 1 | 4.029974000  | 2.039123000  | -0.003059000 |
| 1 | 6.371585000  | 1.434969000  | 0.533873000  |
| 1 | 6.928010000  | -0.883533000 | 1.241994000  |
| 1 | 5.130636000  | -2.592732000 | 1.407245000  |
| 1 | 2.789057000  | -1.989334000 | 0.869049000  |
| 1 | -5.079961000 | -0.343615000 | 2.620359000  |
| 1 | -3.394447000 | -0.909212000 | 2.485849000  |
| 1 | -4.022516000 | -0.322657000 | 4.050615000  |
| 1 | 0.963198000  | -0.664974000 | 0.163520000  |
| 7 | 0.213427000  | 2.250240000  | -0.489445000 |
| 8 | 0.395470000  | 2.269493000  | -2.835651000 |
| 6 | -0.203559000 | 2.558829000  | -1.843074000 |
| 6 | -0.689981000 | 2.896862000  | 0.486804000  |
| 1 | -0.945163000 | 2.214458000  | 1.293752000  |
| 1 | -0.214934000 | 3.799902000  | 0.882008000  |
| 8 | -1.349758000 | 3.245283000  | -1.759285000 |
| 6 | -1.893303000 | 3.201405000  | -0.411293000 |
| 1 | -2.635617000 | 2.404056000  | -0.366786000 |
| 1 | -2.357121000 | 4.165689000  | -0.209813000 |

Protonated intermediate (III<sub>i</sub>)

E = -1724.5089272

H = -1724.216342

G = -1724.306820

xyz

|    |              |              |              |
|----|--------------|--------------|--------------|
| 6  | -3.552587000 | 0.674244000  | -0.096011000 |
| 6  | -4.871635000 | 0.236371000  | -0.044475000 |
| 6  | -5.234005000 | -0.977388000 | -0.638950000 |
| 6  | -4.271887000 | -1.755510000 | -1.285711000 |
| 6  | -2.948238000 | -1.322941000 | -1.344049000 |
| 6  | -2.580881000 | -0.103625000 | -0.749829000 |
| 6  | -1.174870000 | 0.294473000  | -0.838132000 |
| 6  | -0.530410000 | 1.292278000  | -0.323052000 |
| 7  | -1.346509000 | 0.631469000  | 2.839747000  |
| 6  | -1.406214000 | -0.526559000 | 2.784066000  |
| 6  | -1.471253000 | -1.982258000 | 2.688106000  |
| 8  | 0.760343000  | -1.710077000 | -1.613582000 |
| 16 | 2.074705000  | -1.115066000 | -1.225882000 |
| 8  | 3.225539000  | -1.491280000 | -2.046336000 |
| 6  | 2.404654000  | -1.895076000 | 0.434404000  |
| 9  | 1.476498000  | -1.468133000 | 1.342181000  |
| 8  | 1.957457000  | 0.330584000  | -0.868438000 |

|   |              |              |              |
|---|--------------|--------------|--------------|
| 9 | 2.333059000  | -3.227578000 | 0.385739000  |
| 9 | 3.605780000  | -1.542294000 | 0.906995000  |
| 1 | -3.271460000 | 1.614223000  | 0.369839000  |
| 1 | -5.620066000 | 0.841626000  | 0.458707000  |
| 1 | -6.266425000 | -1.313244000 | -0.598203000 |
| 1 | -4.551207000 | -2.697578000 | -1.748410000 |
| 1 | -2.189596000 | -1.921245000 | -1.840576000 |
| 1 | -0.552974000 | -2.356165000 | 2.226538000  |
| 1 | -1.581441000 | -2.425516000 | 3.682489000  |
| 1 | -2.324344000 | -2.277534000 | 2.069535000  |
| 1 | -0.476662000 | -0.381301000 | -1.388484000 |
| 7 | 0.175591000  | 2.217637000  | 0.172348000  |
| 6 | 0.483691000  | 3.471942000  | -0.559055000 |
| 8 | -0.178477000 | 3.917378000  | -1.441836000 |
| 8 | 1.588667000  | 3.969468000  | -0.012659000 |
| 6 | 2.212246000  | 3.017082000  | 0.898011000  |
| 1 | 2.960285000  | 2.455713000  | 0.334992000  |
| 1 | 2.667274000  | 3.594580000  | 1.701825000  |
| 6 | 1.066626000  | 2.112695000  | 1.355830000  |
| 1 | 0.527601000  | 2.486804000  | 2.228360000  |
| 1 | 1.362477000  | 1.076075000  | 1.494486000  |

Acetonitrile addition TS (IV<sub>i</sub>)

E = -1724.5007738

H = -1724.208782

G = -1724.293165

$\bar{u} = -184.8 \text{ cm}^{-1}$

xyz

|   |              |              |              |
|---|--------------|--------------|--------------|
| 6 | -1.375503000 | 3.186667000  | -0.785623000 |
| 6 | -0.426906000 | 2.286108000  | -1.577761000 |
| 7 | 0.786250000  | 2.359896000  | -0.720939000 |
| 6 | 0.715375000  | 3.555220000  | 0.126331000  |
| 8 | -0.498016000 | 4.079081000  | -0.030368000 |
| 6 | 1.667145000  | 1.439902000  | -0.551968000 |
| 7 | 1.197640000  | 0.682068000  | 1.412301000  |
| 6 | 0.460234000  | 0.435587000  | 2.271084000  |
| 6 | -0.448602000 | 0.099093000  | 3.355685000  |
| 8 | 1.609693000  | 3.959825000  | 0.805902000  |
| 6 | 2.626108000  | 0.667339000  | -1.012783000 |
| 6 | 3.110189000  | -0.655179000 | -0.615976000 |
| 6 | 2.238193000  | -1.657798000 | -0.155983000 |
| 6 | 2.748949000  | -2.910667000 | 0.176717000  |
| 6 | 4.114334000  | -3.176274000 | 0.052687000  |
| 6 | 4.980342000  | -2.188039000 | -0.424532000 |

|    |              |              |              |
|----|--------------|--------------|--------------|
| 6  | 4.479577000  | -0.937001000 | -0.770494000 |
| 8  | -2.151494000 | 0.466907000  | 0.686409000  |
| 16 | -1.778405000 | -0.837123000 | 0.068978000  |
| 6  | -3.408442000 | -1.558117000 | -0.464222000 |
| 9  | -3.228708000 | -2.744551000 | -1.058912000 |
| 8  | -1.016017000 | -0.698565000 | -1.203002000 |
| 8  | -1.226844000 | -1.834875000 | 1.012304000  |
| 9  | -4.214679000 | -1.728741000 | 0.593320000  |
| 9  | -4.019376000 | -0.735703000 | -1.333769000 |
| 1  | 1.171899000  | -1.474496000 | -0.094949000 |
| 1  | 2.067698000  | -3.681821000 | 0.523687000  |
| 1  | 4.503417000  | -4.156813000 | 0.313441000  |
| 1  | 6.041178000  | -2.394798000 | -0.532850000 |
| 1  | 5.149719000  | -0.167485000 | -1.145953000 |
| 1  | 0.046768000  | 0.225329000  | 4.322844000  |
| 1  | -1.331193000 | 0.740732000  | 3.289546000  |
| 1  | -0.774393000 | -0.934748000 | 3.208363000  |
| 1  | 3.146354000  | 1.155948000  | -1.841759000 |
| 1  | -0.769209000 | 1.249491000  | -1.654946000 |
| 1  | -0.170439000 | 2.700459000  | -2.558173000 |
| 1  | -2.008275000 | 3.815525000  | -1.411251000 |
| 1  | -1.965944000 | 2.603835000  | -0.075870000 |

Acetonitrile addition intermediate ( $V_i$ )

E = -1724.5571694

H = -1724.261740

G = -1724.342922

xyz

|   |              |              |              |
|---|--------------|--------------|--------------|
| 6 | 1.231160000  | -2.944949000 | -0.616700000 |
| 7 | 2.091733000  | -1.892518000 | -0.064181000 |
| 6 | 3.384799000  | -2.366919000 | 0.121449000  |
| 8 | 3.385395000  | -3.719230000 | -0.074084000 |
| 6 | 2.036244000  | -4.189939000 | -0.230726000 |
| 6 | 1.710346000  | -0.527377000 | -0.076121000 |
| 7 | 0.305385000  | -0.415012000 | -0.041665000 |
| 6 | -0.304850000 | 0.135772000  | 0.916798000  |
| 6 | 0.181819000  | 0.777248000  | 2.178810000  |
| 8 | 4.380792000  | -1.748681000 | 0.413345000  |
| 6 | 2.582882000  | 0.499744000  | -0.180689000 |
| 6 | 2.285872000  | 1.939453000  | -0.245745000 |
| 6 | 3.236200000  | 2.837959000  | 0.277310000  |
| 6 | 3.035141000  | 4.215690000  | 0.223364000  |
| 6 | 1.881321000  | 4.733880000  | -0.367725000 |
| 6 | 0.939315000  | 3.858152000  | -0.912927000 |

|    |              |              |              |
|----|--------------|--------------|--------------|
| 6  | 1.137012000  | 2.479190000  | -0.858332000 |
| 8  | -1.695974000 | 0.216843000  | 0.852942000  |
| 16 | -2.479894000 | -0.453019000 | -0.467919000 |
| 8  | -2.369310000 | -1.902886000 | -0.447716000 |
| 8  | -2.258639000 | 0.348129000  | -1.658782000 |
| 6  | -4.171813000 | -0.009944000 | 0.211374000  |
| 9  | -5.069230000 | -0.430738000 | -0.677495000 |
| 9  | -4.367705000 | -0.620934000 | 1.375252000  |
| 9  | -4.269981000 | 1.305837000  | 0.364853000  |
| 1  | 4.140182000  | 2.441570000  | 0.733365000  |
| 1  | 3.783504000  | 4.885181000  | 0.639574000  |
| 1  | 1.723545000  | 5.807954000  | -0.415019000 |
| 1  | 0.048903000  | 4.249807000  | -1.398133000 |
| 1  | 0.408918000  | 1.819557000  | -1.319687000 |
| 1  | 1.702250000  | -4.615368000 | 0.722647000  |
| 1  | 2.029334000  | -4.967568000 | -0.996380000 |
| 1  | 0.231611000  | -2.929637000 | -0.181269000 |
| 1  | 1.133032000  | -2.828592000 | -1.703950000 |
| 1  | 3.631311000  | 0.226520000  | -0.203087000 |
| 1  | 0.105544000  | 1.866379000  | 2.085429000  |
| 1  | 1.227310000  | 0.516712000  | 2.350218000  |
| 1  | -0.435506000 | 0.459838000  | 3.023938000  |

Friedel-Crafts-like TS ( $\mathbf{VI}_i$ )

E = -1724.5061238

H = -1724.213000

G = -1724.290197

$\bar{u}$  = -475.6 cm<sup>-1</sup>

xyz

|    |              |              |              |
|----|--------------|--------------|--------------|
| 6  | 1.472923000  | -0.525292000 | 0.141830000  |
| 7  | 0.750238000  | -0.080712000 | 1.193627000  |
| 6  | -0.074438000 | 0.937447000  | 1.065468000  |
| 6  | -0.578557000 | 1.650236000  | 2.290750000  |
| 6  | 2.110333000  | 0.334626000  | -0.765040000 |
| 6  | 2.010159000  | 1.737189000  | -0.642710000 |
| 6  | 3.179853000  | 2.539843000  | -0.788287000 |
| 6  | 3.193327000  | 3.845811000  | -0.358937000 |
| 6  | 2.028215000  | 4.449256000  | 0.194181000  |
| 6  | 0.851154000  | 3.747911000  | 0.228328000  |
| 6  | 0.789013000  | 2.381537000  | -0.211932000 |
| 8  | -1.190452000 | 0.736828000  | 0.076120000  |
| 16 | -2.136766000 | -0.578028000 | 0.266718000  |
| 8  | -2.648056000 | -0.676709000 | 1.628898000  |
| 8  | -1.571106000 | -1.743152000 | -0.403275000 |

|   |              |              |              |
|---|--------------|--------------|--------------|
| 6 | -3.512343000 | 0.075119000  | -0.825055000 |
| 9 | -4.444261000 | -0.873801000 | -0.899858000 |
| 9 | -4.035290000 | 1.175112000  | -0.288098000 |
| 9 | -3.044790000 | 0.344384000  | -2.040345000 |
| 1 | 4.086555000  | 2.075388000  | -1.167047000 |
| 1 | 4.111772000  | 4.423425000  | -0.423565000 |
| 1 | 2.067923000  | 5.481296000  | 0.531289000  |
| 1 | -0.067751000 | 4.237074000  | 0.542117000  |
| 1 | -0.096936000 | 2.133804000  | -0.784428000 |
| 1 | 2.952225000  | -0.081123000 | -1.304052000 |
| 1 | -1.224156000 | 2.487563000  | 2.018356000  |
| 1 | 0.274274000  | 2.024593000  | 2.862298000  |
| 1 | -1.153853000 | 0.955622000  | 2.911692000  |
| 7 | 1.806167000  | -1.877083000 | 0.219436000  |
| 1 | 0.155307000  | -2.834873000 | 1.109976000  |
| 6 | 1.237388000  | -2.750920000 | 1.248817000  |
| 1 | 1.436863000  | -2.363282000 | 2.248724000  |
| 6 | 1.981998000  | -4.062892000 | 0.960141000  |
| 1 | 1.336136000  | -4.942015000 | 0.992796000  |
| 1 | 2.833022000  | -4.213589000 | 1.633125000  |
| 8 | 2.485320000  | -3.924399000 | -0.379837000 |
| 6 | 2.471430000  | -2.619062000 | -0.760735000 |
| 8 | 2.966591000  | -2.228439000 | -1.788957000 |

Friedel-Crafts-like intermediate (VII<sub>i</sub>)

E = -1724.5467269

H = -1724.251001

G = -1724.327946

xyz

|    |              |              |              |
|----|--------------|--------------|--------------|
| 6  | 1.885529000  | -0.098084000 | 0.175875000  |
| 7  | 0.630914000  | -0.352053000 | 0.358861000  |
| 6  | -0.276459000 | 0.751374000  | 0.522793000  |
| 6  | -0.486828000 | 1.073958000  | 2.002820000  |
| 6  | 2.445958000  | 1.249774000  | 0.091526000  |
| 6  | 1.587789000  | 2.279253000  | -0.120144000 |
| 6  | 2.011112000  | 3.660295000  | -0.190677000 |
| 6  | 1.104789000  | 4.666199000  | -0.249630000 |
| 6  | -0.329685000 | 4.405979000  | -0.240618000 |
| 6  | -0.805844000 | 3.149429000  | -0.253411000 |
| 6  | 0.114087000  | 1.960455000  | -0.349712000 |
| 8  | -1.587331000 | 0.331324000  | -0.045860000 |
| 16 | -2.047589000 | -1.228620000 | 0.016135000  |
| 8  | -1.960140000 | -1.775082000 | 1.364987000  |
| 8  | -1.579852000 | -1.977185000 | -1.142012000 |

|   |              |              |              |
|---|--------------|--------------|--------------|
| 6 | -3.848088000 | -0.825587000 | -0.297604000 |
| 9 | -4.517101000 | -1.978655000 | -0.337493000 |
| 9 | -4.329201000 | -0.067200000 | 0.687114000  |
| 9 | -3.987927000 | -0.189331000 | -1.459534000 |
| 1 | 3.076806000  | 3.869600000  | -0.150555000 |
| 1 | 1.443736000  | 5.698343000  | -0.275304000 |
| 1 | -1.009797000 | 5.253281000  | -0.223153000 |
| 1 | -1.873263000 | 2.948790000  | -0.264464000 |
| 1 | 0.036007000  | 1.586312000  | -1.388233000 |
| 1 | 3.514807000  | 1.392090000  | 0.169388000  |
| 1 | -1.286764000 | 1.808101000  | 2.130830000  |
| 1 | 0.437308000  | 1.486469000  | 2.420031000  |
| 1 | -0.745524000 | 0.160350000  | 2.540547000  |
| 7 | 2.713867000  | -1.216765000 | 0.088660000  |
| 1 | 1.475271000  | -2.720801000 | -0.720646000 |
| 6 | 2.141548000  | -2.562619000 | 0.133922000  |
| 1 | 1.553132000  | -2.702747000 | 1.042751000  |
| 6 | 3.413170000  | -3.424159000 | 0.090957000  |
| 1 | 3.347926000  | -4.256579000 | -0.611878000 |
| 1 | 3.691119000  | -3.806957000 | 1.078264000  |
| 8 | 4.459058000  | -2.540487000 | -0.357905000 |
| 6 | 4.063487000  | -1.244153000 | -0.276182000 |
| 8 | 4.802249000  | -0.315146000 | -0.492791000 |

Final N-protonated product (VIII<sub>i</sub>)

E = -1724.6306219

H = -1724.333251

G = -1724.410481

xyz

|   |              |              |              |
|---|--------------|--------------|--------------|
| 6 | -0.418045000 | 3.383891000  | 0.515357000  |
| 7 | -0.243080000 | 2.234994000  | -0.281903000 |
| 6 | 0.856028000  | 2.452985000  | -1.240374000 |
| 6 | 1.624211000  | 3.552018000  | -0.509433000 |
| 8 | 0.617844000  | 4.216578000  | 0.293941000  |
| 6 | -1.125537000 | 1.167601000  | -0.280994000 |
| 7 | -0.633394000 | -0.042170000 | -0.725447000 |
| 6 | -1.351578000 | -1.172828000 | -0.789298000 |
| 6 | -2.701643000 | -1.158069000 | -0.365705000 |
| 6 | -3.243148000 | 0.075338000  | 0.123613000  |
| 6 | -2.436323000 | 1.233089000  | 0.144922000  |
| 6 | -3.522935000 | -2.320210000 | -0.396429000 |
| 6 | -4.825158000 | -2.258992000 | 0.037302000  |
| 6 | -5.363520000 | -1.036898000 | 0.518047000  |
| 6 | -4.595657000 | 0.102502000  | 0.561155000  |

|    |              |              |              |
|----|--------------|--------------|--------------|
| 6  | -0.656811000 | -2.406371000 | -1.292174000 |
| 8  | 1.916638000  | -0.577798000 | -1.331298000 |
| 16 | 2.980027000  | -0.519053000 | -0.246504000 |
| 6  | 2.424190000  | -1.905136000 | 0.868210000  |
| 9  | 2.430819000  | -3.076890000 | 0.212635000  |
| 8  | -1.332315000 | 3.620004000  | 1.267136000  |
| 8  | 4.313602000  | -0.903660000 | -0.706943000 |
| 8  | 2.843616000  | 0.690323000  | 0.588903000  |
| 9  | 3.202489000  | -2.009504000 | 1.945626000  |
| 9  | 1.152777000  | -1.681669000 | 1.282544000  |
| 1  | -5.006203000 | 1.036926000  | 0.932167000  |
| 1  | -6.394863000 | -1.006234000 | 0.857650000  |
| 1  | -5.448139000 | -3.147770000 | 0.014923000  |
| 1  | -3.114149000 | -3.257165000 | -0.758325000 |
| 1  | 0.402889000  | -0.141803000 | -0.945686000 |
| 1  | -2.823288000 | 2.173851000  | 0.509378000  |
| 1  | -1.233330000 | -2.864549000 | -2.102095000 |
| 1  | -0.566361000 | -3.141034000 | -0.484359000 |
| 1  | 0.347910000  | -2.177339000 | -1.649095000 |
| 1  | 0.442459000  | 2.790603000  | -2.199884000 |
| 1  | 1.469429000  | 1.566412000  | -1.387460000 |
| 1  | 2.066109000  | 4.295413000  | -1.173079000 |
| 1  | 2.378113000  | 3.123231000  | 0.155042000  |

## A.2) Methylthio derivative pathway

Starting methylthio derivative + acetonitrile + TfOH system (pre-association complex in Scheme X1) (I<sub>1</sub>)

E = -1840.6784723

H = -1840.426422

G = -1840.516214

xyz

|    |              |              |              |
|----|--------------|--------------|--------------|
| 6  | 2.887992000  | -0.122393000 | 0.248678000  |
| 6  | 4.165660000  | -0.673294000 | 0.182666000  |
| 6  | 5.278347000  | 0.157936000  | 0.036855000  |
| 6  | 5.113643000  | 1.543941000  | -0.044314000 |
| 6  | 3.840628000  | 2.101446000  | 0.018324000  |
| 6  | 2.709565000  | 1.271572000  | 0.166043000  |
| 6  | 1.410095000  | 1.869767000  | 0.227964000  |
| 6  | 0.384686000  | 2.539215000  | 0.250811000  |
| 16 | -1.016241000 | 3.469841000  | 0.400348000  |
| 6  | -1.596808000 | 3.565505000  | -1.346759000 |
| 7  | 2.679713000  | -3.784535000 | 0.201074000  |
| 6  | 1.673005000  | -4.300190000 | -0.058078000 |
| 6  | 0.404505000  | -4.946643000 | -0.384573000 |

|    |              |              |              |
|----|--------------|--------------|--------------|
| 8  | -1.660827000 | 0.072232000  | -1.605564000 |
| 16 | -1.716624000 | -0.825757000 | -0.458886000 |
| 8  | -1.688842000 | -2.271512000 | -0.605137000 |
| 6  | -3.274840000 | -0.422204000 | 0.490446000  |
| 9  | -3.327318000 | 0.887106000  | 0.731745000  |
| 8  | -0.613598000 | -0.415954000 | 0.633702000  |
| 9  | -4.319193000 | -0.780897000 | -0.255753000 |
| 9  | -3.292833000 | -1.092228000 | 1.638725000  |
| 1  | 2.030008000  | -0.776446000 | 0.365218000  |
| 1  | 4.273723000  | -1.751542000 | 0.243458000  |
| 1  | 6.274649000  | -0.273079000 | -0.014107000 |
| 1  | 5.979043000  | 2.191279000  | -0.157409000 |
| 1  | 3.703966000  | 3.176597000  | -0.044900000 |
| 1  | -2.519167000 | 4.151931000  | -1.319088000 |
| 1  | -0.854896000 | 4.075352000  | -1.963723000 |
| 1  | -1.799710000 | 2.564672000  | -1.729857000 |
| 1  | 0.119478000  | -5.640844000 | 0.412376000  |
| 1  | -0.379810000 | -4.191878000 | -0.497455000 |
| 1  | 0.497420000  | -5.506902000 | -1.320407000 |
| 1  | -0.175497000 | 0.455360000  | 0.410133000  |

Protonation TS (II<sub>i</sub>)

E = -1840.6643589

H = -1840.417938

G = -1840.502597

$\bar{u} = -812.7 \text{ cm}^{-1}$

xyz

|    |              |              |              |
|----|--------------|--------------|--------------|
| 6  | -3.889006000 | 0.198729000  | 0.036859000  |
| 6  | -4.959298000 | -0.647498000 | -0.231966000 |
| 6  | -4.727472000 | -1.963771000 | -0.643973000 |
| 6  | -3.419833000 | -2.430223000 | -0.789434000 |
| 6  | -2.341446000 | -1.586150000 | -0.532340000 |
| 6  | -2.567856000 | -0.264530000 | -0.111942000 |
| 6  | -1.436526000 | 0.607850000  | 0.163360000  |
| 6  | -1.133067000 | 1.700281000  | 0.725716000  |
| 16 | -0.484105000 | 3.073707000  | 1.318054000  |
| 6  | 0.048855000  | 2.570222000  | 3.016290000  |
| 7  | 0.202029000  | 3.286964000  | -1.997861000 |
| 6  | 1.065105000  | 2.693783000  | -2.499021000 |
| 6  | 2.154494000  | 1.947805000  | -3.123886000 |
| 8  | 0.789706000  | -0.331869000 | -0.830097000 |
| 16 | 1.997441000  | -0.419571000 | 0.125696000  |
| 8  | 3.248723000  | -0.090429000 | -0.558772000 |
| 6  | 2.061917000  | -2.252657000 | 0.448839000  |



|   |              |              |              |
|---|--------------|--------------|--------------|
| 9 | 0.873792000  | -2.672704000 | 0.914413000  |
| 8 | 1.712090000  | 0.199402000  | 1.427858000  |
| 9 | 2.337157000  | -2.914097000 | -0.677892000 |
| 9 | 3.000992000  | -2.523164000 | 1.357984000  |
| 1 | -4.063050000 | 1.223356000  | 0.351818000  |
| 1 | -5.976156000 | -0.281812000 | -0.120125000 |
| 1 | -5.566133000 | -2.622619000 | -0.851418000 |
| 1 | -3.237373000 | -3.452677000 | -1.107271000 |
| 1 | -1.323312000 | -1.946290000 | -0.636266000 |
| 1 | 0.562439000  | 3.439657000  | 3.434177000  |
| 1 | -0.820500000 | 2.318653000  | 3.625326000  |
| 1 | 0.733014000  | 1.726646000  | 2.918902000  |
| 1 | 2.885428000  | 2.639338000  | -3.554966000 |
| 1 | 2.648366000  | 1.314070000  | -2.380022000 |
| 1 | 1.761409000  | 1.308309000  | -3.920436000 |
| 1 | -0.278542000 | 0.188258000  | -0.288154000 |

Protonated intermediate (III<sub>i</sub>)

E = -1840.6670337

H = -1840.416092

G = -1840.502184

xyz

|    |              |              |              |
|----|--------------|--------------|--------------|
| 6  | 4.016902000  | 0.009873000  | -0.337553000 |
| 6  | 5.171553000  | -0.715637000 | -0.068774000 |
| 6  | 5.101086000  | -1.893624000 | 0.683769000  |
| 6  | 3.872358000  | -2.343563000 | 1.170331000  |
| 6  | 2.710520000  | -1.620450000 | 0.909138000  |
| 6  | 2.776366000  | -0.439093000 | 0.150633000  |
| 6  | 1.530697000  | 0.278726000  | -0.101549000 |
| 6  | 1.212198000  | 1.294032000  | -0.837195000 |
| 16 | 0.662484000  | 2.573616000  | -1.627277000 |
| 6  | 0.022075000  | 1.857314000  | -3.208375000 |
| 7  | 0.163153000  | 3.464228000  | 1.459359000  |
| 6  | -0.774436000 | 3.156770000  | 2.071816000  |
| 6  | -1.955936000 | 2.758698000  | 2.832189000  |
| 8  | -0.780375000 | -0.909637000 | 1.028148000  |
| 16 | -1.973274000 | -0.413539000 | 0.259996000  |
| 8  | -3.038741000 | 0.162116000  | 1.097458000  |
| 6  | -2.707446000 | -1.976836000 | -0.429646000 |
| 9  | -1.813006000 | -2.603501000 | -1.211525000 |
| 8  | -1.594828000 | 0.370621000  | -0.942461000 |
| 9  | -3.063986000 | -2.807241000 | 0.556978000  |
| 9  | -3.789072000 | -1.695265000 | -1.167743000 |
| 1  | 4.069850000  | 0.929085000  | -0.914780000 |

|   |              |              |              |
|---|--------------|--------------|--------------|
| 1 | 6.128988000  | -0.364656000 | -0.442950000 |
| 1 | 6.006399000  | -2.457316000 | 0.891156000  |
| 1 | 3.817683000  | -3.256892000 | 1.755297000  |
| 1 | 1.747254000  | -1.959346000 | 1.279043000  |
| 1 | -0.412275000 | 2.693576000  | -3.761315000 |
| 1 | 0.837913000  | 1.406738000  | -3.775040000 |
| 1 | -0.740037000 | 1.126916000  | -2.931343000 |
| 1 | -2.666446000 | 3.590002000  | 2.883378000  |
| 1 | -2.436720000 | 1.900525000  | 2.345940000  |
| 1 | -1.669049000 | 2.477731000  | 3.850574000  |
| 1 | 0.597518000  | -0.125193000 | 0.407781000  |

Acetonitrile addition TS (IV<sub>i</sub>)

E = -1840.6399379

H = -1840.389398

G = -1840.472378

$\bar{U} = -338.1 \text{ cm}^{-1}$

xyz

|    |              |              |              |
|----|--------------|--------------|--------------|
| 6  | 1.219745000  | 1.461547000  | -0.124347000 |
| 6  | 2.229434000  | 2.028005000  | 0.676994000  |
| 6  | 2.304165000  | 3.408286000  | 0.833904000  |
| 6  | 1.373752000  | 4.241328000  | 0.204381000  |
| 6  | 0.350554000  | 3.687321000  | -0.566823000 |
| 6  | 0.262569000  | 2.306615000  | -0.722047000 |
| 6  | 1.048875000  | 0.032781000  | -0.354185000 |
| 6  | 1.782886000  | -1.057893000 | -0.253477000 |
| 7  | 3.624157000  | -0.600122000 | 0.099878000  |
| 6  | 4.753465000  | -0.720086000 | -0.128779000 |
| 6  | 6.174622000  | -0.871474000 | -0.409137000 |
| 16 | 1.690422000  | -2.727637000 | -0.272053000 |
| 6  | 0.894585000  | -3.142873000 | 1.341834000  |
| 8  | -1.624359000 | -1.289571000 | 0.945190000  |
| 16 | -2.431537000 | -1.037084000 | -0.277284000 |
| 8  | -3.359710000 | -2.097682000 | -0.685319000 |
| 8  | -1.615574000 | -0.441084000 | -1.389303000 |
| 6  | -3.519263000 | 0.387813000  | 0.221948000  |
| 9  | -4.330003000 | 0.747754000  | -0.784044000 |
| 9  | -4.275215000 | 0.067603000  | 1.281295000  |
| 9  | -2.769125000 | 1.459329000  | 0.553142000  |
| 1  | 2.930570000  | 1.389693000  | 1.200609000  |
| 1  | 3.080287000  | 3.837328000  | 1.461836000  |
| 1  | 1.436020000  | 5.318459000  | 0.333887000  |
| 1  | -0.389968000 | 4.328808000  | -1.035303000 |
| 1  | -0.550466000 | 1.861329000  | -1.287012000 |

|   |              |              |              |
|---|--------------|--------------|--------------|
| 1 | 0.734663000  | -4.224245000 | 1.308359000  |
| 1 | 1.566674000  | -2.892034000 | 2.164786000  |
| 1 | -0.058862000 | -2.609547000 | 1.400746000  |
| 1 | 6.485978000  | -0.133134000 | -1.154470000 |
| 1 | 6.756225000  | -0.723691000 | 0.506142000  |
| 1 | 6.369756000  | -1.876230000 | -0.797982000 |
| 1 | 0.041765000  | -0.254042000 | -0.751029000 |

Acetonitrile addition intermediate (V<sub>i</sub>)

E = -1840.7184693

H = -1840.463937

G = -1840.541304

xyz

|    |              |              |              |
|----|--------------|--------------|--------------|
| 6  | -1.625387000 | 1.567359000  | -0.010534000 |
| 7  | -0.397174000 | 0.879588000  | -0.022988000 |
| 6  | 0.179373000  | 0.512477000  | 1.036892000  |
| 6  | -0.230662000 | 0.607661000  | 2.474398000  |
| 6  | -2.842861000 | 0.990215000  | -0.111283000 |
| 6  | -3.202119000 | -0.433491000 | -0.154380000 |
| 6  | -4.530480000 | -0.784948000 | 0.157622000  |
| 6  | -4.954259000 | -2.110952000 | 0.127596000  |
| 6  | -4.061179000 | -3.122359000 | -0.231721000 |
| 6  | -2.746430000 | -2.789236000 | -0.565457000 |
| 6  | -2.316117000 | -1.464298000 | -0.527367000 |
| 8  | 1.425756000  | -0.110299000 | 0.942766000  |
| 16 | 2.154967000  | -0.233136000 | -0.559154000 |
| 8  | 2.516684000  | 1.080882000  | -1.063962000 |
| 8  | 1.500478000  | -1.247495000 | -1.367253000 |
| 6  | 3.704588000  | -1.001936000 | 0.166801000  |
| 9  | 4.536333000  | -1.230352000 | -0.847695000 |
| 9  | 4.267205000  | -0.164193000 | 1.031717000  |
| 9  | 3.404625000  | -2.146720000 | 0.771418000  |
| 1  | -5.233530000 | -0.001381000 | 0.431303000  |
| 1  | -5.983330000 | -2.353831000 | 0.379452000  |
| 1  | -4.388661000 | -4.158108000 | -0.260788000 |
| 1  | -2.047977000 | -3.566097000 | -0.865524000 |
| 1  | -1.299042000 | -1.228257000 | -0.818978000 |
| 1  | -3.682967000 | 1.679143000  | -0.143605000 |
| 1  | -0.221061000 | -0.387576000 | 2.930525000  |
| 1  | -1.231699000 | 1.034189000  | 2.547512000  |
| 1  | 0.477361000  | 1.236965000  | 3.023753000  |
| 16 | -1.492931000 | 3.347998000  | 0.148679000  |
| 6  | -0.285518000 | 3.745817000  | -1.177709000 |
| 1  | -0.720718000 | 3.559160000  | -2.162170000 |

|   |              |             |              |
|---|--------------|-------------|--------------|
| 1 | -0.064282000 | 4.811226000 | -1.073789000 |
| 1 | 0.633037000  | 3.168481000 | -1.059693000 |

Friedel-Crafts-like TS (VI<sub>i</sub>)

E = -1840.6607703

H = -1840.408880

G = -1840.481522

$\bar{U} = -496.9 \text{ cm}^{-1}$

xyz

|    |              |              |              |
|----|--------------|--------------|--------------|
| 6  | -1.462355000 | 1.583260000  | -0.167477000 |
| 7  | -0.814231000 | 1.013076000  | 0.853397000  |
| 6  | -0.353992000 | -0.222754000 | 0.770735000  |
| 6  | 0.031535000  | -0.948229000 | 2.031789000  |
| 6  | -2.393684000 | 0.905608000  | -0.975088000 |
| 6  | -2.730947000 | -0.440393000 | -0.726845000 |
| 6  | -4.097285000 | -0.849699000 | -0.744553000 |
| 6  | -4.480767000 | -2.039706000 | -0.174621000 |
| 6  | -3.521328000 | -2.920527000 | 0.403707000  |
| 6  | -2.187231000 | -2.622481000 | 0.320951000  |
| 6  | -1.733754000 | -1.391875000 | -0.272987000 |
| 8  | 0.658792000  | -0.450871000 | -0.314140000 |
| 16 | 2.079103000  | 0.351522000  | -0.321320000 |
| 8  | 2.278559000  | 1.130829000  | 0.894255000  |
| 8  | 2.271933000  | 0.917653000  | -1.644283000 |
| 6  | 3.198669000  | -1.143878000 | -0.198906000 |
| 9  | 4.461847000  | -0.725698000 | -0.249073000 |
| 9  | 2.984478000  | -1.773007000 | 0.959893000  |
| 9  | 2.960513000  | -1.978958000 | -1.207077000 |
| 1  | -4.842812000 | -0.163126000 | -1.137802000 |
| 1  | -5.533878000 | -2.306765000 | -0.143962000 |
| 1  | -3.853496000 | -3.851754000 | 0.854106000  |
| 1  | -1.445100000 | -3.342921000 | 0.655905000  |
| 1  | -0.879814000 | -1.507219000 | -0.931000000 |
| 1  | -3.119726000 | 1.525983000  | -1.495370000 |
| 1  | 0.349421000  | -1.970320000 | 1.817386000  |
| 1  | -0.828033000 | -0.972768000 | 2.705927000  |
| 1  | 0.853557000  | -0.418594000 | 2.525091000  |
| 16 | -1.442405000 | 3.352857000  | -0.291117000 |
| 6  | -0.311075000 | 3.819614000  | 1.064967000  |
| 1  | -0.778617000 | 3.652928000  | 2.036475000  |
| 1  | 0.618894000  | 3.252205000  | 1.000868000  |
| 1  | -0.110472000 | 4.885183000  | 0.927218000  |

Friedel-Crafts-like intermediate (VII<sub>i</sub>)

E = -1840.7022834

H = -1840.447755

G = -1840.519412

xyz

|    |              |              |              |
|----|--------------|--------------|--------------|
| 6  | 0.940393000  | 1.281250000  | -0.149940000 |
| 6  | 0.428733000  | 2.669138000  | 0.131703000  |
| 6  | 1.203264000  | 3.752947000  | -0.047595000 |
| 6  | 2.597030000  | 3.619777000  | -0.453766000 |
| 6  | 3.187761000  | 2.407542000  | -0.591098000 |
| 6  | 2.451611000  | 1.189025000  | -0.337896000 |
| 6  | 3.017102000  | -0.043576000 | -0.301593000 |
| 6  | 2.161725000  | -1.193168000 | -0.003602000 |
| 16 | 2.859801000  | -2.772810000 | -0.398655000 |
| 6  | 1.514701000  | -3.888241000 | 0.126924000  |
| 7  | 0.982116000  | -1.115159000 | 0.508751000  |
| 6  | 0.492660000  | 0.199414000  | 0.855355000  |
| 6  | 0.810464000  | 0.522078000  | 2.315590000  |
| 8  | -1.244068000 | -0.595772000 | -1.585699000 |
| 16 | -1.796386000 | -0.751554000 | -0.243625000 |
| 8  | -2.145826000 | -2.058899000 | 0.287530000  |
| 6  | -3.341589000 | 0.301138000  | -0.159000000 |
| 9  | -3.056448000 | 1.561499000  | -0.499671000 |
| 8  | -0.995931000 | 0.148451000  | 0.844815000  |
| 9  | -4.224559000 | -0.199735000 | -1.022704000 |
| 9  | -3.854396000 | 0.278265000  | 1.068705000  |
| 1  | 0.497029000  | 0.977325000  | -1.115345000 |
| 1  | -0.617759000 | 2.759438000  | 0.408464000  |
| 1  | 0.801084000  | 4.750759000  | 0.105024000  |
| 1  | 3.175740000  | 4.524277000  | -0.621327000 |
| 1  | 4.240748000  | 2.326897000  | -0.848810000 |
| 1  | 1.856809000  | -4.901941000 | -0.094661000 |
| 1  | 1.326869000  | -3.776299000 | 1.195993000  |
| 1  | 0.599279000  | -3.666948000 | -0.423821000 |
| 1  | 0.484015000  | -0.309173000 | 2.944183000  |
| 1  | 1.889994000  | 0.656493000  | 2.431195000  |
| 1  | 0.305349000  | 1.437485000  | 2.635114000  |
| 1  | 4.073485000  | -0.196828000 | -0.501400000 |

Final N-protonated product (**VIII**);

E = -1840.7834835

H = -1840.527750

G = -1840.602810

xyz

|    |              |              |              |
|----|--------------|--------------|--------------|
| 6  | -3.099539000 | -0.733113000 | -0.094875000 |
| 6  | -4.033606000 | -1.791948000 | 0.052482000  |
| 6  | -5.363772000 | -1.517251000 | 0.279976000  |
| 6  | -5.815023000 | -0.178474000 | 0.366284000  |
| 6  | -4.931688000 | 0.869494000  | 0.228390000  |
| 6  | -3.555589000 | 0.619178000  | -0.002220000 |
| 6  | -2.607853000 | 1.669189000  | -0.128450000 |
| 6  | -1.282472000 | 1.391693000  | -0.341137000 |
| 16 | -0.063390000 | 2.665320000  | -0.575852000 |
| 6  | 0.840699000  | 2.603901000  | 1.029437000  |
| 7  | -0.890734000 | 0.072417000  | -0.449330000 |
| 6  | -1.714129000 | -0.969953000 | -0.334954000 |
| 6  | -1.126983000 | -2.345792000 | -0.465943000 |
| 8  | 1.784746000  | -0.528161000 | 1.454121000  |
| 16 | 2.395170000  | -1.055736000 | 0.211390000  |
| 8  | 2.859230000  | -2.445970000 | 0.225926000  |
| 6  | 3.924756000  | -0.026394000 | -0.040172000 |
| 9  | 3.602873000  | 1.279486000  | -0.114280000 |
| 8  | 1.575017000  | -0.691249000 | -1.009650000 |
| 9  | 4.770912000  | -0.191422000 | 0.984162000  |
| 9  | 4.547958000  | -0.371059000 | -1.172010000 |
| 1  | -3.695310000 | -2.820187000 | -0.008218000 |
| 1  | -6.073033000 | -2.331119000 | 0.394972000  |
| 1  | -6.867832000 | 0.020492000  | 0.544365000  |
| 1  | -5.274965000 | 1.897766000  | 0.297170000  |
| 1  | 1.707562000  | 3.254488000  | 0.890742000  |
| 1  | 0.210334000  | 2.995951000  | 1.830522000  |
| 1  | 1.185977000  | 1.591631000  | 1.251265000  |
| 1  | -0.100170000 | -2.300511000 | -0.831148000 |
| 1  | -1.119223000 | -2.845176000 | 0.510502000  |
| 1  | -1.724611000 | -2.955462000 | -1.150374000 |
| 1  | -2.924798000 | 2.702778000  | -0.046911000 |
| 1  | 0.146315000  | -0.144100000 | -0.643132000 |

## B) Pyrimidine route

### B.1) Oxazolidinone derivative pathway

Starting oxazolidinone derivative + 2 acetonitrile + TfOH system (pre-association complex in Scheme X2)

(I<sub>p</sub>)

E = -1857.2847149

H = -1856.939577

G = -1857.045337

xyz

|    |              |              |              |
|----|--------------|--------------|--------------|
| 6  | -3.724721000 | -1.548476000 | 1.804924000  |
| 6  | -2.339872000 | -1.981828000 | 1.690550000  |
| 8  | 1.727408000  | -0.533130000 | 0.915025000  |
| 16 | 2.271635000  | -1.879205000 | 0.735869000  |
| 6  | 1.968361000  | -2.307457000 | -1.055648000 |
| 9  | 2.554160000  | -1.383144000 | -1.827004000 |
| 7  | -1.237271000 | -2.320614000 | 1.605685000  |
| 8  | 3.661523000  | -2.185181000 | 1.016053000  |
| 8  | 1.361751000  | -2.965948000 | 1.446348000  |
| 9  | 2.472776000  | -3.502699000 | -1.342767000 |
| 9  | 0.652560000  | -2.311743000 | -1.300215000 |
| 1  | -4.111927000 | -1.288446000 | 0.814665000  |
| 1  | -4.331462000 | -2.352194000 | 2.233721000  |
| 1  | -3.760060000 | -0.667951000 | 2.456271000  |
| 1  | 0.389534000  | -2.673802000 | 1.508386000  |
| 7  | -2.511111000 | 0.967632000  | 3.508874000  |
| 6  | -1.426740000 | 1.336133000  | 3.319190000  |
| 6  | -0.063903000 | 1.797722000  | 3.075664000  |
| 1  | 0.507501000  | 1.016392000  | 2.562796000  |
| 1  | -0.073735000 | 2.693983000  | 2.446271000  |
| 1  | 0.427692000  | 2.033010000  | 4.025115000  |
| 6  | -2.400615000 | 0.737539000  | -1.427468000 |
| 6  | -3.617511000 | 1.396383000  | -1.159593000 |
| 6  | -4.831091000 | 0.750461000  | -1.383270000 |
| 6  | -4.857538000 | -0.555236000 | -1.882781000 |
| 6  | -3.654652000 | -1.217121000 | -2.148162000 |
| 6  | -2.435303000 | -0.583448000 | -1.919032000 |
| 6  | -1.154780000 | 1.396398000  | -1.215357000 |
| 6  | -0.097628000 | 1.963178000  | -1.035247000 |
| 1  | -3.596779000 | 2.412439000  | -0.778408000 |
| 1  | -5.761025000 | 1.272232000  | -1.173713000 |
| 1  | -5.806748000 | -1.050751000 | -2.067698000 |
| 1  | -3.665617000 | -2.232477000 | -2.535805000 |
| 1  | -1.500788000 | -1.100281000 | -2.111487000 |
| 7  | 1.095226000  | 2.567388000  | -0.899561000 |
| 6  | 1.337055000  | 3.600958000  | 0.011435000  |
| 8  | 0.537469000  | 4.142998000  | 0.732139000  |
| 8  | 2.660187000  | 3.905094000  | -0.033167000 |
| 6  | 3.313941000  | 3.164412000  | -1.082826000 |
| 1  | 3.473051000  | 3.838286000  | -1.931028000 |
| 1  | 4.277470000  | 2.819889000  | -0.704358000 |
| 1  | 2.593548000  | 1.083565000  | -0.910209000 |
| 6  | 2.349499000  | 2.016737000  | -1.424910000 |
| 1  | 2.276125000  | 1.832017000  | -2.499529000 |

Protonation TS (II<sub>p</sub>)

E = -1857.2701564

H = -1856.930098

G = -1857.034182

$\bar{u} = -827.0 \text{ cm}^{-1}$

xyz

|    |              |              |              |
|----|--------------|--------------|--------------|
| 6  | 2.508494000  | 1.375621000  | 1.445954000  |
| 7  | 2.076878000  | 1.611689000  | 0.051732000  |
| 6  | 3.182342000  | 2.023526000  | -0.780842000 |
| 8  | 4.271862000  | 2.079044000  | -0.007859000 |
| 6  | 4.035030000  | 1.552620000  | 1.318644000  |
| 6  | 0.867400000  | 1.480590000  | -0.397045000 |
| 6  | -0.269559000 | 1.144730000  | -0.810802000 |
| 6  | -1.594668000 | 1.686968000  | -1.078499000 |
| 6  | -1.919106000 | 3.010177000  | -0.719561000 |
| 6  | -3.189400000 | 3.516077000  | -0.978622000 |
| 6  | -4.152676000 | 2.715039000  | -1.599852000 |
| 6  | -3.840430000 | 1.402153000  | -1.956409000 |
| 6  | -2.571822000 | 0.887088000  | -1.695205000 |
| 8  | 3.110341000  | 2.303469000  | -1.941161000 |
| 8  | -0.162298000 | -1.459087000 | -1.060945000 |
| 16 | -0.177195000 | -2.246245000 | 0.282765000  |
| 6  | -1.980449000 | -2.697585000 | 0.415124000  |
| 9  | -2.377387000 | -3.366067000 | -0.667791000 |
| 8  | 0.088411000  | -1.371766000 | 1.431911000  |
| 8  | 0.540450000  | -3.510410000 | 0.144370000  |
| 9  | -2.173948000 | -3.451664000 | 1.498292000  |
| 9  | -2.716194000 | -1.578931000 | 0.528329000  |
| 7  | 3.668064000  | -1.120668000 | -0.352869000 |
| 6  | 3.469422000  | -2.066049000 | -0.995219000 |
| 6  | 3.207194000  | -3.258386000 | -1.794546000 |
| 6  | -2.051282000 | 1.001814000  | 2.808475000  |
| 6  | -1.045068000 | 2.059613000  | 2.792913000  |
| 7  | -0.235205000 | 2.891312000  | 2.765144000  |
| 1  | -1.171460000 | 3.627096000  | -0.230779000 |
| 1  | -3.427840000 | 4.538236000  | -0.697871000 |
| 1  | -5.142383000 | 3.114205000  | -1.804254000 |
| 1  | -4.585534000 | 0.775784000  | -2.438784000 |
| 1  | -2.331194000 | -0.134389000 | -1.970901000 |
| 1  | 4.056216000  | -3.946564000 | -1.736073000 |
| 1  | 2.308741000  | -3.751019000 | -1.411130000 |
| 1  | 3.047454000  | -2.980425000 | -2.840934000 |
| 1  | -0.142243000 | -0.285077000 | -0.938817000 |
| 1  | -1.605788000 | 0.070166000  | 2.446232000  |
| 1  | -2.428072000 | 0.851551000  | 3.824990000  |
| 1  | -2.886493000 | 1.271396000  | 2.154792000  |
| 1  | 4.561152000  | 0.601231000  | 1.389599000  |



|   |             |             |             |
|---|-------------|-------------|-------------|
| 1 | 4.440456000 | 2.273900000 | 2.030191000 |
| 1 | 2.033663000 | 2.108463000 | 2.101289000 |
| 1 | 2.225375000 | 0.365020000 | 1.743134000 |

Protonated intermediate (III<sub>p</sub>)

E = -1857.2830051

H = -1856.938022

G = -1857.039039

xyz

|    |              |              |              |
|----|--------------|--------------|--------------|
| 6  | -1.459598000 | 3.340174000  | -0.600699000 |
| 6  | -2.641652000 | 4.056569000  | -0.751918000 |
| 6  | -3.759716000 | 3.453674000  | -1.338053000 |
| 6  | -3.694592000 | 2.127872000  | -1.770535000 |
| 6  | -2.512893000 | 1.403842000  | -1.626612000 |
| 6  | -1.387155000 | 2.007467000  | -1.041868000 |
| 6  | -0.172995000 | 1.201914000  | -0.913087000 |
| 6  | 0.942149000  | 1.421996000  | -0.290435000 |
| 7  | 3.497310000  | -0.850028000 | -1.026112000 |
| 6  | 3.133829000  | -1.806847000 | -1.573465000 |
| 6  | 2.674513000  | -3.014735000 | -2.249978000 |
| 8  | -0.188325000 | -1.711861000 | -1.372426000 |
| 16 | -0.195225000 | -2.307458000 | -0.001664000 |
| 8  | 0.455225000  | -3.623713000 | 0.103075000  |
| 6  | -2.003343000 | -2.646961000 | 0.288024000  |
| 9  | -2.726290000 | -1.520484000 | 0.088384000  |
| 8  | 0.132564000  | -1.330942000 | 1.073543000  |
| 9  | -2.462104000 | -3.586848000 | -0.542031000 |
| 9  | -2.217631000 | -3.047973000 | 1.552538000  |
| 1  | -0.593771000 | 3.807382000  | -0.141066000 |
| 1  | -2.693066000 | 5.086902000  | -0.412211000 |
| 1  | -4.680226000 | 4.018723000  | -1.455555000 |
| 1  | -4.563043000 | 1.656449000  | -2.221285000 |
| 1  | -2.456047000 | 0.366852000  | -1.943279000 |
| 1  | 3.528083000  | -3.574409000 | -2.644788000 |
| 1  | 2.108936000  | -3.627332000 | -1.539973000 |
| 1  | 2.001191000  | -2.743154000 | -3.067613000 |
| 1  | -0.163262000 | 0.181638000  | -1.354096000 |
| 7  | -0.440438000 | 2.184075000  | 2.643380000  |
| 6  | -1.163716000 | 1.285767000  | 2.781153000  |
| 6  | -2.055870000 | 0.142164000  | 2.940901000  |
| 1  | -1.482375000 | -0.780471000 | 2.816187000  |
| 1  | -2.528964000 | 0.163816000  | 3.927397000  |
| 1  | -2.830282000 | 0.161188000  | 2.168856000  |
| 7  | 2.041607000  | 1.460505000  | 0.324348000  |

|   |             |              |              |
|---|-------------|--------------|--------------|
| 6 | 3.275286000 | 2.070583000  | -0.251806000 |
| 8 | 3.294410000 | 2.713440000  | -1.252535000 |
| 8 | 4.259339000 | 1.815166000  | 0.597210000  |
| 6 | 3.879143000 | 0.846264000  | 1.611776000  |
| 1 | 4.258055000 | -0.123027000 | 1.288834000  |
| 1 | 4.346388000 | 1.163254000  | 2.544025000  |
| 1 | 1.945841000 | 1.560433000  | 2.416750000  |
| 6 | 2.345853000 | 0.883015000  | 1.660008000  |
| 1 | 1.869827000 | -0.096300000 | 1.731746000  |

First acetonitrile addition TS ( $\mathbf{IV}_p$ )

E = -1857.2695101

H = -1856.925134

G = -1857.023739

$\bar{u}$  = -225.3  $\text{cm}^{-1}$

xyz

|    |              |              |              |
|----|--------------|--------------|--------------|
| 6  | 2.257182000  | -1.328845000 | -1.081411000 |
| 6  | 3.618171000  | -1.078658000 | -1.323078000 |
| 6  | 4.523491000  | -2.136994000 | -1.356500000 |
| 6  | 4.082848000  | -3.446930000 | -1.150362000 |
| 6  | 2.728071000  | -3.701267000 | -0.923066000 |
| 6  | 1.813096000  | -2.651563000 | -0.900723000 |
| 6  | 1.244183000  | -0.275565000 | -1.058112000 |
| 6  | 1.217381000  | 0.963720000  | -0.622485000 |
| 7  | 2.885661000  | 1.279100000  | 0.453706000  |
| 6  | 3.335494000  | 1.460759000  | 1.506062000  |
| 6  | 3.909305000  | 1.675514000  | 2.825358000  |
| 8  | -1.850677000 | 0.331704000  | -1.149536000 |
| 16 | -2.206317000 | -0.522718000 | 0.015237000  |
| 8  | -2.357655000 | 0.226690000  | 1.289705000  |
| 8  | -1.403568000 | -1.769878000 | 0.121627000  |
| 6  | -3.927306000 | -1.117179000 | -0.366885000 |
| 9  | -4.374941000 | -1.913986000 | 0.615595000  |
| 9  | -4.765535000 | -0.077134000 | -0.485033000 |
| 9  | -3.942121000 | -1.808463000 | -1.514303000 |
| 1  | 3.954113000  | -0.065025000 | -1.511898000 |
| 1  | 5.573276000  | -1.940421000 | -1.556214000 |
| 1  | 4.792922000  | -4.269024000 | -1.180060000 |
| 1  | 2.381772000  | -4.719722000 | -0.771816000 |
| 1  | 0.756370000  | -2.832800000 | -0.723331000 |
| 1  | 4.780749000  | 1.027910000  | 2.962809000  |
| 1  | 4.214540000  | 2.720081000  | 2.939382000  |
| 1  | 3.138165000  | 1.423122000  | 3.561430000  |
| 1  | 0.236071000  | -0.529237000 | -1.407218000 |

|   |              |              |              |
|---|--------------|--------------|--------------|
| 7 | 0.977778000  | 0.454252000  | 3.433115000  |
| 6 | 0.186588000  | -0.395372000 | 3.408636000  |
| 6 | -0.797046000 | -1.471884000 | 3.380414000  |
| 1 | -0.855836000 | -1.888093000 | 2.368684000  |
| 1 | -0.520706000 | -2.249018000 | 4.100262000  |
| 1 | -1.785100000 | -1.072335000 | 3.622400000  |
| 7 | 0.550079000  | 2.071512000  | -0.584646000 |
| 6 | 0.460924000  | 2.975749000  | -1.718210000 |
| 8 | 1.127603000  | 2.912950000  | -2.707730000 |
| 8 | -0.478135000 | 3.880996000  | -1.426419000 |
| 6 | -1.209686000 | 3.503251000  | -0.225648000 |
| 1 | -1.462488000 | 4.422033000  | 0.302894000  |
| 1 | -2.107022000 | 2.963862000  | -0.533783000 |
| 1 | -0.777125000 | 1.776624000  | 1.053269000  |
| 6 | -0.254355000 | 2.586477000  | 0.541825000  |
| 1 | 0.399520000  | 3.130774000  | 1.231786000  |

First acetonitrile addition intermediate ( $V_p$ )

E = -1857.2941386

H = -1856.948276

G = -1857.044628

xyz

|    |              |              |              |
|----|--------------|--------------|--------------|
| 6  | -2.690341000 | 2.314936000  | -1.305508000 |
| 6  | -2.967920000 | 3.678414000  | -1.253720000 |
| 6  | -1.938993000 | 4.593295000  | -1.014953000 |
| 6  | -0.629184000 | 4.138544000  | -0.845628000 |
| 6  | -0.339143000 | 2.777721000  | -0.911137000 |
| 6  | -1.375034000 | 1.845862000  | -1.121552000 |
| 6  | -1.026827000 | 0.425371000  | -1.187909000 |
| 6  | -1.735602000 | -0.609857000 | -0.674766000 |
| 7  | -1.924230000 | 0.274546000  | 3.163569000  |
| 6  | -0.769157000 | 0.364836000  | 3.247913000  |
| 6  | 0.681344000  | 0.470158000  | 3.346757000  |
| 8  | 2.079387000  | 0.086312000  | -1.391285000 |
| 16 | 2.500208000  | 0.139511000  | 0.033343000  |
| 8  | 2.304287000  | 1.453675000  | 0.689942000  |
| 6  | 4.348095000  | -0.065038000 | -0.042516000 |
| 9  | 4.668859000  | -1.231812000 | -0.623613000 |
| 8  | 2.045044000  | -1.031087000 | 0.836190000  |
| 9  | 4.904964000  | 0.927278000  | -0.750442000 |
| 9  | 4.871471000  | -0.051016000 | 1.193192000  |
| 1  | -3.486783000 | 1.614866000  | -1.544321000 |
| 1  | -3.983550000 | 4.029296000  | -1.416133000 |
| 1  | -2.156823000 | 5.657116000  | -0.974806000 |

|   |              |              |              |
|---|--------------|--------------|--------------|
| 1 | 0.175177000  | 4.845880000  | -0.665388000 |
| 1 | 0.676057000  | 2.422501000  | -0.760841000 |
| 1 | 1.154030000  | -0.404944000 | 2.887771000  |
| 1 | 1.042094000  | 1.334391000  | 2.779999000  |
| 1 | 0.980055000  | 0.558098000  | 4.396066000  |
| 1 | -0.053143000 | 0.183530000  | -1.614112000 |
| 7 | -2.842991000 | -0.365424000 | 0.122778000  |
| 6 | -3.699475000 | -0.261592000 | 0.885154000  |
| 6 | -4.787102000 | -0.140326000 | 1.826924000  |
| 1 | -5.441331000 | 0.687303000  | 1.533111000  |
| 1 | -5.356661000 | -1.076211000 | 1.823630000  |
| 1 | -4.350512000 | 0.048241000  | 2.813792000  |
| 7 | -1.385643000 | -1.964336000 | -0.720154000 |
| 6 | -2.318244000 | -3.001356000 | -0.714745000 |
| 8 | -3.515078000 | -2.907324000 | -0.552336000 |
| 8 | -1.664946000 | -4.167191000 | -0.909748000 |
| 6 | -0.234523000 | -3.936873000 | -0.912487000 |
| 1 | 0.158239000  | -4.228776000 | 0.066110000  |
| 1 | 0.205228000  | -4.563608000 | -1.688759000 |
| 1 | 0.081870000  | -2.201757000 | -2.229940000 |
| 6 | -0.069329000 | -2.434143000 | -1.168216000 |
| 1 | 0.734194000  | -1.986443000 | -0.579045000 |

Second acetonitrile addition TS ( $\mathbf{VI}_p$ )

E = -1857.2836703

H = -1856.937896

G = -1857.029689

$\bar{u}$  = -277.8  $\text{cm}^{-1}$

xyz

|   |              |              |              |
|---|--------------|--------------|--------------|
| 6 | -2.163653000 | 1.575377000  | -0.803441000 |
| 6 | -3.536420000 | 1.471288000  | -1.095328000 |
| 6 | -4.387685000 | 2.554249000  | -0.886089000 |
| 6 | -3.885443000 | 3.756518000  | -0.382110000 |
| 6 | -2.522050000 | 3.874697000  | -0.099829000 |
| 6 | -1.663634000 | 2.800142000  | -0.317162000 |
| 6 | -1.203256000 | 0.488607000  | -1.001450000 |
| 6 | -1.385178000 | -0.838158000 | -0.823484000 |
| 7 | -2.596820000 | -1.357432000 | -0.324023000 |
| 6 | -3.180791000 | -1.555777000 | 0.697635000  |
| 6 | -4.415143000 | -2.130463000 | 1.247149000  |
| 7 | -2.304161000 | -0.872578000 | 2.233438000  |
| 6 | -1.177341000 | -0.777231000 | 2.516749000  |
| 6 | 0.206439000  | -0.623675000 | 2.904943000  |
| 8 | 2.256629000  | -0.816719000 | 0.376437000  |

|    |              |              |              |
|----|--------------|--------------|--------------|
| 16 | 2.245412000  | 0.630355000  | 0.037675000  |
| 8  | 1.455951000  | 1.474369000  | 0.976780000  |
| 8  | 1.999655000  | 0.925891000  | -1.397750000 |
| 6  | 4.002577000  | 1.176950000  | 0.309760000  |
| 9  | 4.137168000  | 2.482993000  | 0.043040000  |
| 9  | 4.367501000  | 0.964540000  | 1.583818000  |
| 9  | 4.834853000  | 0.491552000  | -0.488173000 |
| 1  | -3.929829000 | 0.553998000  | -1.524006000 |
| 1  | -5.442967000 | 2.464882000  | -1.130589000 |
| 1  | -4.551344000 | 4.600200000  | -0.222218000 |
| 1  | -2.124364000 | 4.809355000  | 0.285777000  |
| 1  | -0.604274000 | 2.880463000  | -0.087625000 |
| 1  | -4.153648000 | -2.910203000 | 1.968693000  |
| 1  | -4.976967000 | -1.352085000 | 1.770654000  |
| 1  | -5.011133000 | -2.553382000 | 0.434566000  |
| 1  | -0.194732000 | 0.785043000  | -1.283297000 |
| 1  | 0.618822000  | 0.287505000  | 2.442444000  |
| 1  | 0.286633000  | -0.584599000 | 3.996318000  |
| 1  | 0.776890000  | -1.471277000 | 2.510617000  |
| 7  | -0.446011000 | -1.819528000 | -1.153799000 |
| 6  | -0.132549000 | -2.881602000 | -0.313155000 |
| 8  | -0.672164000 | -3.157376000 | 0.739370000  |
| 8  | 0.855149000  | -3.607272000 | -0.868402000 |
| 6  | 1.460782000  | -2.864207000 | -1.953101000 |
| 1  | 2.386420000  | -2.427958000 | -1.575458000 |
| 1  | 1.660526000  | -3.564706000 | -2.765425000 |
| 1  | -0.127573000 | -1.997824000 | -3.232857000 |
| 6  | 0.440175000  | -1.770284000 | -2.322316000 |
| 1  | 0.931446000  | -0.799823000 | -2.411965000 |

Second acetonitrile addition intermediate (**VII<sub>p</sub>**)

E = -1857.3226126

H = -1856.974111

G = -1857.063109

xyz

|   |              |             |              |
|---|--------------|-------------|--------------|
| 6 | 1.083978000  | 3.272536000 | -1.295846000 |
| 6 | 2.363628000  | 3.804262000 | -1.161141000 |
| 6 | 3.049965000  | 3.677976000 | 0.048189000  |
| 6 | 2.438703000  | 3.014828000 | 1.115301000  |
| 6 | 1.161992000  | 2.474158000 | 0.981076000  |
| 6 | 0.454181000  | 2.592722000 | -0.233111000 |
| 6 | -0.896243000 | 2.079528000 | -0.464932000 |
| 6 | -1.675497000 | 1.298033000 | 0.314589000  |
| 7 | -1.357827000 | 0.906511000 | 1.627624000  |

|    |              |              |              |
|----|--------------|--------------|--------------|
| 6  | -1.326000000 | -0.332294000 | 1.960364000  |
| 6  | -1.035834000 | -0.733540000 | 3.381049000  |
| 8  | 1.602194000  | -2.474808000 | -1.834196000 |
| 16 | 1.749498000  | -2.261833000 | -0.404708000 |
| 8  | 0.457193000  | -1.422367000 | 0.212344000  |
| 6  | 2.952510000  | -0.843219000 | -0.137864000 |
| 9  | 4.162864000  | -1.311462000 | -0.440778000 |
| 8  | 2.087837000  | -3.346796000 | 0.504903000  |
| 9  | 2.639117000  | 0.161581000  | -0.937623000 |
| 9  | 2.922297000  | -0.459929000 | 1.132980000  |
| 1  | 0.555661000  | 3.376501000  | -2.240785000 |
| 1  | 2.824490000  | 4.318464000  | -2.000591000 |
| 1  | 4.048782000  | 4.091953000  | 0.158425000  |
| 1  | 2.962376000  | 2.915717000  | 2.063099000  |
| 1  | 0.697730000  | 1.965930000  | 1.817146000  |
| 1  | -1.850256000 | -1.347698000 | 3.781418000  |
| 1  | -0.123172000 | -1.341100000 | 3.420514000  |
| 1  | -0.907036000 | 0.157751000  | 3.997359000  |
| 1  | -1.319250000 | 2.324606000  | -1.434792000 |
| 7  | -1.645961000 | -1.400560000 | 1.106945000  |
| 6  | -0.854511000 | -1.941176000 | 0.288759000  |
| 6  | -1.226724000 | -3.053920000 | -0.636066000 |
| 1  | -1.136031000 | -2.712650000 | -1.671107000 |
| 1  | -0.576989000 | -3.923833000 | -0.492198000 |
| 1  | -2.260173000 | -3.336840000 | -0.435678000 |
| 7  | -2.951537000 | 0.887472000  | -0.174702000 |
| 6  | -3.122683000 | 0.076268000  | -1.284443000 |
| 8  | -2.286334000 | -0.316449000 | -2.063423000 |
| 8  | -4.448734000 | -0.247115000 | -1.387406000 |
| 6  | -5.200045000 | 0.482249000  | -0.401850000 |
| 1  | -5.666411000 | 1.347668000  | -0.886424000 |
| 1  | -5.976881000 | -0.174996000 | -0.006733000 |
| 1  | -4.094205000 | 0.186303000  | 1.472155000  |
| 6  | -4.159069000 | 0.904287000  | 0.644349000  |
| 1  | -4.349199000 | 1.899960000  | 1.054923000  |

Pyrimidine scaffold formation TS (**VIII<sub>p</sub>**)

E = -1857.2918924

H = -1856.945201

G = -1857.029964

$\bar{u}$  = -368.7 cm<sup>-1</sup>

xyz

|   |             |              |              |
|---|-------------|--------------|--------------|
| 6 | 2.830464000 | -0.148698000 | -0.711047000 |
| 6 | 3.266472000 | -1.148084000 | -1.605965000 |

|    |              |              |              |
|----|--------------|--------------|--------------|
| 6  | 4.607929000  | -1.511139000 | -1.693212000 |
| 6  | 5.559171000  | -0.877682000 | -0.891436000 |
| 6  | 5.147289000  | 0.122922000  | -0.008913000 |
| 6  | 3.804115000  | 0.482561000  | 0.087494000  |
| 6  | 1.391719000  | 0.173723000  | -0.704990000 |
| 6  | 0.779959000  | 1.306931000  | -0.127578000 |
| 7  | 1.157727000  | 1.838783000  | 1.047380000  |
| 6  | 1.205700000  | 1.076986000  | 2.124071000  |
| 7  | 0.950306000  | -0.237209000 | 2.117753000  |
| 6  | 0.583362000  | -0.960202000 | 1.096056000  |
| 6  | 1.182654000  | -2.317427000 | 0.851944000  |
| 6  | 1.553199000  | 1.714577000  | 3.435622000  |
| 8  | -0.879155000 | -0.888969000 | 0.871932000  |
| 16 | -1.713469000 | -1.880887000 | -0.107796000 |
| 8  | -1.307082000 | -1.703387000 | -1.501774000 |
| 8  | -1.843223000 | -3.213397000 | 0.463258000  |
| 6  | -3.349165000 | -0.991695000 | 0.115570000  |
| 9  | -3.271910000 | 0.233501000  | -0.406106000 |
| 9  | -4.268351000 | -1.695801000 | -0.544402000 |
| 9  | -3.667206000 | -0.921817000 | 1.399434000  |
| 1  | 2.536772000  | -1.639417000 | -2.246024000 |
| 1  | 4.910174000  | -2.285669000 | -2.393290000 |
| 1  | 6.607128000  | -1.156895000 | -0.956158000 |
| 1  | 5.878387000  | 0.631744000  | 0.614160000  |
| 1  | 3.511581000  | 1.273343000  | 0.767467000  |
| 1  | 2.089548000  | 1.014872000  | 4.080657000  |
| 1  | 2.142423000  | 2.619329000  | 3.270141000  |
| 1  | 0.624071000  | 2.005075000  | 3.941237000  |
| 1  | 0.850266000  | -0.273883000 | -1.532953000 |
| 1  | 0.768641000  | -3.014909000 | 1.589153000  |
| 1  | 0.967992000  | -2.700358000 | -0.147292000 |
| 1  | 2.261676000  | -2.253636000 | 0.989313000  |
| 7  | -0.339280000 | 1.849598000  | -0.740891000 |
| 6  | -1.347925000 | 2.585936000  | -0.079077000 |
| 8  | -1.500964000 | 2.757244000  | 1.097660000  |
| 8  | -2.192036000 | 3.083170000  | -1.028181000 |
| 6  | -1.673701000 | 2.830817000  | -2.344833000 |
| 1  | -2.510074000 | 2.578720000  | -2.998644000 |
| 1  | -1.185214000 | 3.741190000  | -2.709743000 |
| 1  | 0.207290000  | 1.772012000  | -2.784103000 |
| 6  | -0.680445000 | 1.677568000  | -2.154137000 |
| 1  | -1.144320000 | 0.701663000  | -2.329783000 |

Pyrimidine intermediate (**IX<sub>p</sub>**)

E = -1857.3508002

H = -1857.000863

G = -1857.086086

xyz

|    |              |              |              |
|----|--------------|--------------|--------------|
| 6  | 2.263501000  | -0.910002000 | -0.510028000 |
| 6  | 2.579336000  | -1.161274000 | -1.852492000 |
| 6  | 3.829033000  | -1.667319000 | -2.207268000 |
| 6  | 4.787334000  | -1.922036000 | -1.225113000 |
| 6  | 4.487304000  | -1.662196000 | 0.112418000  |
| 6  | 3.235252000  | -1.158768000 | 0.468219000  |
| 6  | 0.864299000  | -0.383080000 | -0.176004000 |
| 6  | 0.896155000  | 0.762752000  | 0.818046000  |
| 7  | 0.794297000  | 0.578568000  | 2.097508000  |
| 6  | 0.577685000  | -0.735786000 | 2.531291000  |
| 7  | 0.158817000  | -1.729656000 | 1.820464000  |
| 6  | -0.078655000 | -1.457327000 | 0.430123000  |
| 6  | -0.161820000 | -2.753751000 | -0.351981000 |
| 6  | 0.838035000  | -0.943180000 | 3.995496000  |
| 8  | -1.498437000 | -0.846889000 | 0.485328000  |
| 16 | -2.219181000 | -0.085563000 | -0.727452000 |
| 8  | -2.103072000 | 1.359623000  | -0.551583000 |
| 8  | -1.928333000 | -0.698786000 | -2.020198000 |
| 6  | -3.964002000 | -0.566039000 | -0.253863000 |
| 9  | -4.251777000 | -0.113850000 | 0.964151000  |
| 9  | -4.791981000 | -0.016076000 | -1.142976000 |
| 9  | -4.091729000 | -1.890564000 | -0.285278000 |
| 1  | 1.845770000  | -0.943411000 | -2.622726000 |
| 1  | 4.055184000  | -1.853139000 | -3.253631000 |
| 1  | 5.763098000  | -2.312807000 | -1.500611000 |
| 1  | 5.228460000  | -1.849519000 | 0.884775000  |
| 1  | 3.025366000  | -0.955688000 | 1.513125000  |
| 1  | 0.675334000  | -1.987126000 | 4.266784000  |
| 1  | 1.863156000  | -0.645109000 | 4.246049000  |
| 1  | 0.170877000  | -0.300361000 | 4.581832000  |
| 1  | 0.440937000  | -0.033913000 | -1.116715000 |
| 1  | -0.933260000 | -3.380407000 | 0.102318000  |
| 1  | -0.398259000 | -2.579455000 | -1.403200000 |
| 1  | 0.795133000  | -3.276141000 | -0.275761000 |
| 7  | 1.024988000  | 2.060023000  | 0.385607000  |
| 6  | 1.195377000  | 2.509494000  | -0.939077000 |
| 8  | 1.374109000  | 1.848448000  | -1.928428000 |
| 8  | 1.155932000  | 3.862300000  | -0.934298000 |
| 6  | 0.734621000  | 4.353709000  | 0.353099000  |
| 1  | 1.329105000  | 5.237936000  | 0.587549000  |
| 1  | -0.322325000 | 4.628538000  | 0.283765000  |
| 1  | 0.150051000  | 3.044622000  | 2.032434000  |
| 6  | 0.964178000  | 3.184164000  | 1.320481000  |
| 1  | 1.903536000  | 3.263134000  | 1.878466000  |



Final N-protonated product ( $X_p$ )

E = -1857.3998465

H = -1857.050274

G = -1857.138442

xyz

|    |              |              |              |
|----|--------------|--------------|--------------|
| 6  | 0.182149000  | 0.663472000  | -0.607254000 |
| 6  | 1.500270000  | 0.335640000  | -0.266968000 |
| 6  | 1.768396000  | -1.052646000 | -0.141607000 |
| 7  | 0.816953000  | -2.000923000 | -0.212601000 |
| 6  | -0.415557000 | -1.631713000 | -0.512482000 |
| 7  | -0.722047000 | -0.339704000 | -0.750627000 |
| 6  | 2.491209000  | 1.394849000  | 0.085966000  |
| 6  | 2.908281000  | 1.518292000  | 1.419032000  |
| 6  | 3.798881000  | 2.526006000  | 1.790431000  |
| 6  | 4.279329000  | 3.421791000  | 0.834733000  |
| 6  | 3.868817000  | 3.304103000  | -0.494793000 |
| 6  | 2.982544000  | 2.295967000  | -0.868599000 |
| 6  | -1.511320000 | -2.646865000 | -0.612865000 |
| 8  | -3.250727000 | 0.034060000  | -1.283762000 |
| 16 | -3.996897000 | 0.849536000  | -0.244414000 |
| 8  | -3.084234000 | 1.348245000  | 0.809050000  |
| 6  | -0.356184000 | 2.048621000  | -0.784347000 |
| 8  | -4.979726000 | 1.777888000  | -0.803103000 |
| 6  | -5.001657000 | -0.457875000 | 0.619684000  |
| 9  | -4.186577000 | -1.388301000 | 1.172276000  |
| 9  | -5.732215000 | 0.079670000  | 1.600782000  |
| 9  | -5.818135000 | -1.082662000 | -0.235890000 |
| 1  | 2.522582000  | 0.833469000  | 2.169805000  |
| 1  | 4.107839000  | 2.615437000  | 2.828145000  |
| 1  | 4.970604000  | 4.208341000  | 1.123923000  |
| 1  | 4.245137000  | 3.993188000  | -1.245325000 |
| 1  | 2.687349000  | 2.189568000  | -1.907802000 |
| 1  | -1.921783000 | -2.664809000 | -1.628475000 |
| 1  | -1.114950000 | -3.630844000 | -0.361451000 |
| 1  | -2.339500000 | -2.388875000 | 0.053433000  |
| 1  | -1.757441000 | -0.106218000 | -0.970677000 |
| 1  | -0.710513000 | 2.181698000  | -1.814003000 |
| 1  | -1.225767000 | 2.182158000  | -0.128174000 |
| 1  | 0.399090000  | 2.802086000  | -0.570002000 |
| 7  | 3.040262000  | -1.544367000 | 0.126041000  |
| 6  | 4.197341000  | -1.170839000 | -0.597628000 |
| 8  | 4.288026000  | -0.334507000 | -1.453479000 |
| 8  | 5.214777000  | -1.974308000 | -0.199580000 |
| 6  | 4.774275000  | -2.846399000 | 0.860145000  |

|   |             |              |             |
|---|-------------|--------------|-------------|
| 1 | 5.247217000 | -3.818571000 | 0.716466000 |
| 1 | 5.088220000 | -2.419341000 | 1.818439000 |
| 6 | 3.250337000 | -2.873699000 | 0.710799000 |
| 1 | 2.907936000 | -3.662121000 | 0.032360000 |
| 1 | 2.722916000 | -2.974399000 | 1.661284000 |

## B.2) Methylthio derivative pathway

Starting methylthio derivative + 2 acetonitrile + TfOH system (pre-association complex in Scheme X2) ( $I_p$ )

E = -1973.4508472

H = -1973.146554

G = -1973.247926

xyz

|    |              |              |              |
|----|--------------|--------------|--------------|
| 6  | -2.650061000 | -2.156783000 | 2.155593000  |
| 6  | -1.223573000 | -2.201585000 | 1.867553000  |
| 8  | 2.017616000  | 0.414509000  | 0.885019000  |
| 16 | 2.977605000  | -0.630185000 | 0.527848000  |
| 6  | 2.692785000  | -0.975285000 | -1.284537000 |
| 9  | 2.823537000  | 0.164311000  | -1.967833000 |
| 7  | -0.089014000 | -2.230490000 | 1.643793000  |
| 8  | 4.405133000  | -0.453623000 | 0.710290000  |
| 8  | 2.553580000  | -2.025158000 | 1.156315000  |
| 9  | 3.573099000  | -1.865276000 | -1.730743000 |
| 9  | 1.454119000  | -1.454323000 | -1.459428000 |
| 1  | -3.213499000 | -2.127205000 | 1.217686000  |
| 1  | -2.941840000 | -3.043184000 | 2.727555000  |
| 1  | -2.860397000 | -1.254087000 | 2.740243000  |
| 1  | 1.556218000  | -2.069407000 | 1.339878000  |
| 7  | -2.088289000 | 0.762680000  | 3.590545000  |
| 6  | -1.164251000 | 1.407860000  | 3.313001000  |
| 6  | 0.000253000  | 2.215609000  | 2.963642000  |
| 1  | 0.762906000  | 1.587704000  | 2.492254000  |
| 1  | -0.284568000 | 2.999614000  | 2.254472000  |
| 1  | 0.419471000  | 2.680175000  | 3.861801000  |
| 6  | -2.696647000 | 0.287116000  | -1.203107000 |
| 6  | -4.090289000 | 0.327351000  | -0.994528000 |
| 6  | -4.860376000 | -0.820909000 | -1.162586000 |
| 6  | -4.261894000 | -2.026168000 | -1.542115000 |
| 6  | -2.879583000 | -2.075496000 | -1.748046000 |
| 6  | -2.099209000 | -0.934009000 | -1.579023000 |
| 6  | -1.901389000 | 1.457952000  | -1.043712000 |
| 6  | -1.208023000 | 2.451949000  | -0.921653000 |
| 16 | -0.300745000 | 3.864710000  | -0.730336000 |
| 1  | -4.555927000 | 1.263719000  | -0.703576000 |

|   |              |              |              |
|---|--------------|--------------|--------------|
| 1 | -5.934083000 | -0.773288000 | -1.001673000 |
| 1 | -4.867789000 | -2.917277000 | -1.681601000 |
| 1 | -2.406041000 | -3.007616000 | -2.044999000 |
| 1 | -1.025717000 | -0.972609000 | -1.730652000 |
| 6 | 1.374075000  | 3.287976000  | -1.233845000 |
| 1 | 1.369765000  | 2.992672000  | -2.284739000 |
| 1 | 1.694454000  | 2.457645000  | -0.603126000 |
| 1 | 2.040076000  | 4.143717000  | -1.094860000 |

Protonation TS ( $\Pi_p$ )

E = -1973.4280992

H = -1973.129540

G = -1973.230069

$\bar{u}$  = -976.7 cm<sup>-1</sup>

xyz

|    |              |              |              |
|----|--------------|--------------|--------------|
| 6  | -2.129130000 | 0.149957000  | -1.147110000 |
| 6  | -3.457478000 | 0.618482000  | -1.120307000 |
| 6  | -4.473369000 | -0.125347000 | -1.710854000 |
| 6  | -4.182766000 | -1.344927000 | -2.330619000 |
| 6  | -2.869989000 | -1.819223000 | -2.356039000 |
| 6  | -1.845103000 | -1.078010000 | -1.770408000 |
| 6  | -1.062159000 | 0.921971000  | -0.531232000 |
| 6  | -0.837572000 | 1.954619000  | 0.157238000  |
| 16 | -0.278263000 | 3.249687000  | 0.984010000  |
| 6  | -0.287681000 | 2.658913000  | 2.737392000  |
| 8  | 1.288209000  | -0.163727000 | -0.857636000 |
| 16 | 2.033202000  | -0.632365000 | 0.417188000  |
| 8  | 1.288369000  | -0.298783000 | 1.640835000  |
| 8  | 3.460857000  | -0.329356000 | 0.340844000  |
| 6  | 1.889786000  | -2.482047000 | 0.244757000  |
| 9  | 2.449115000  | -3.079055000 | 1.298198000  |
| 9  | 0.590621000  | -2.829919000 | 0.190249000  |
| 9  | 2.490578000  | -2.896747000 | -0.870636000 |
| 6  | 3.714933000  | 1.985452000  | -2.253117000 |
| 6  | 2.513722000  | 2.798733000  | -2.080912000 |
| 7  | 1.560214000  | 3.445497000  | -1.938957000 |
| 7  | -3.051392000 | 0.560072000  | 2.953577000  |
| 6  | -2.532290000 | -0.444285000 | 2.689392000  |
| 6  | -1.855287000 | -1.692081000 | 2.347288000  |
| 1  | -3.678995000 | 1.562396000  | -0.632349000 |
| 1  | -5.494405000 | 0.244638000  | -1.685883000 |
| 1  | -4.979094000 | -1.923210000 | -2.791012000 |
| 1  | -2.641213000 | -2.766649000 | -2.835722000 |
| 1  | -0.825313000 | -1.447869000 | -1.784907000 |

|   |              |              |              |
|---|--------------|--------------|--------------|
| 1 | 0.066312000  | 3.505873000  | 3.330468000  |
| 1 | -1.298675000 | 2.373329000  | 3.029809000  |
| 1 | 0.398389000  | 1.814883000  | 2.820456000  |
| 1 | 4.602941000  | 2.625134000  | -2.277590000 |
| 1 | 3.805571000  | 1.271817000  | -1.427987000 |
| 1 | 3.658129000  | 1.427092000  | -3.192860000 |
| 1 | 0.199530000  | 0.399327000  | -0.649260000 |
| 1 | -0.788145000 | -1.500679000 | 2.196876000  |
| 1 | -1.980917000 | -2.424964000 | 3.150465000  |
| 1 | -2.270920000 | -2.104054000 | 1.422504000  |

Protonated intermediate (III<sub>p</sub>)

E = -1973.4347143

H = -1973.132169

G = -1973.228369

xyz

|    |              |              |              |
|----|--------------|--------------|--------------|
| 6  | -3.512405000 | 0.445601000  | -0.928717000 |
| 6  | -4.528454000 | -0.401446000 | -1.355461000 |
| 6  | -4.218289000 | -1.581944000 | -2.040372000 |
| 6  | -2.886999000 | -1.917943000 | -2.294902000 |
| 6  | -1.861216000 | -1.073624000 | -1.875479000 |
| 6  | -2.169945000 | 0.116093000  | -1.191991000 |
| 6  | -1.059897000 | 0.966513000  | -0.772107000 |
| 6  | -0.986826000 | 2.029179000  | -0.031176000 |
| 16 | -0.680412000 | 3.317424000  | 0.858728000  |
| 6  | -0.284281000 | 2.650468000  | 2.540156000  |
| 7  | 1.671458000  | 3.416368000  | -1.591278000 |
| 6  | 2.594212000  | 2.756286000  | -1.839293000 |
| 6  | 3.756371000  | 1.927093000  | -2.144630000 |
| 8  | 1.497372000  | -0.313327000 | -1.145621000 |
| 16 | 2.045208000  | -0.560487000 | 0.229508000  |
| 8  | 3.474541000  | -0.246765000 | 0.380114000  |
| 6  | 1.939674000  | -2.412880000 | 0.377381000  |
| 9  | 0.662713000  | -2.816619000 | 0.195615000  |
| 8  | 1.149249000  | -0.080643000 | 1.315789000  |
| 9  | 2.701635000  | -3.014102000 | -0.541251000 |
| 9  | 2.330272000  | -2.814600000 | 1.593785000  |
| 1  | -3.750370000 | 1.356061000  | -0.387183000 |
| 1  | -5.564046000 | -0.144843000 | -1.152438000 |
| 1  | -5.016741000 | -2.239808000 | -2.372391000 |
| 1  | -2.646312000 | -2.837120000 | -2.820927000 |
| 1  | -0.820428000 | -1.329526000 | -2.049635000 |
| 1  | 0.163675000  | 3.486499000  | 3.082488000  |
| 1  | -1.210145000 | 2.315033000  | 3.009210000  |

|   |              |              |              |
|---|--------------|--------------|--------------|
| 1 | 0.421181000  | 1.826339000  | 2.410045000  |
| 1 | 4.628017000  | 2.558806000  | -2.343270000 |
| 1 | 3.961550000  | 1.258489000  | -1.301701000 |
| 1 | 3.550383000  | 1.310800000  | -3.024776000 |
| 1 | -0.028864000 | 0.638019000  | -1.074671000 |
| 7 | -2.924733000 | 0.581990000  | 2.622778000  |
| 6 | -2.343288000 | -0.420937000 | 2.548439000  |
| 6 | -1.577488000 | -1.658001000 | 2.434385000  |
| 1 | -0.542120000 | -1.413911000 | 2.172954000  |
| 1 | -1.599495000 | -2.207272000 | 3.380763000  |
| 1 | -1.997974000 | -2.290026000 | 1.646263000  |

First acetonitrile addition TS ( $IV_p$ )

E = -1973.4164907

H = -1973.113678

G = -1973.209027

$\bar{u}$  = -312.3  $\text{cm}^{-1}$

xyz

|    |              |              |              |
|----|--------------|--------------|--------------|
| 6  | -1.785141000 | 1.744124000  | -0.204049000 |
| 6  | -3.015438000 | 2.119572000  | -0.774819000 |
| 6  | -3.590627000 | 3.343453000  | -0.445207000 |
| 6  | -2.949724000 | 4.206710000  | 0.448676000  |
| 6  | -1.718019000 | 3.850601000  | 1.002424000  |
| 6  | -1.129692000 | 2.633228000  | 0.670785000  |
| 6  | -1.097569000 | 0.491372000  | -0.494750000 |
| 6  | -1.445346000 | -0.703298000 | -0.929059000 |
| 7  | -3.405593000 | -0.883513000 | -0.763251000 |
| 6  | -4.121230000 | -1.479971000 | -0.069967000 |
| 6  | -4.983327000 | -2.244599000 | 0.815604000  |
| 16 | -0.882126000 | -2.145721000 | -1.529563000 |
| 6  | -0.178190000 | -1.677717000 | -3.168965000 |
| 8  | 2.118988000  | -0.429815000 | -1.410432000 |
| 16 | 2.508348000  | -0.351100000 | 0.017534000  |
| 8  | 2.929597000  | -1.615739000 | 0.648219000  |
| 8  | 1.547311000  | 0.458368000  | 0.839301000  |
| 6  | 4.040512000  | 0.704462000  | 0.006849000  |
| 9  | 4.492336000  | 0.893663000  | 1.255606000  |
| 9  | 5.008296000  | 0.118775000  | -0.711707000 |
| 9  | 3.780555000  | 1.905965000  | -0.533272000 |
| 1  | -3.503636000 | 1.465081000  | -1.487218000 |
| 1  | -4.536582000 | 3.631336000  | -0.895597000 |
| 1  | -3.403588000 | 5.161507000  | 0.700056000  |
| 1  | -1.209665000 | 4.526061000  | 1.684383000  |
| 1  | -0.162935000 | 2.351603000  | 1.078558000  |

|   |              |              |              |
|---|--------------|--------------|--------------|
| 1 | 0.110641000  | -2.620465000 | -3.641224000 |
| 1 | -0.934545000 | -1.173834000 | -3.772717000 |
| 1 | 0.699293000  | -1.057028000 | -2.982085000 |
| 1 | -4.336844000 | -2.700129000 | 1.575683000  |
| 1 | -5.715665000 | -1.586952000 | 1.293753000  |
| 1 | -5.506789000 | -3.023921000 | 0.253469000  |
| 1 | -0.017085000 | 0.480500000  | -0.242075000 |
| 7 | -1.996383000 | -2.645447000 | 2.101487000  |
| 6 | -0.903900000 | -2.380121000 | 2.393906000  |
| 6 | 0.466614000  | -2.033764000 | 2.754895000  |
| 1 | 0.658864000  | -0.976639000 | 2.543105000  |
| 1 | 0.637981000  | -2.240067000 | 3.816120000  |
| 1 | 1.183436000  | -2.597639000 | 2.150332000  |

First acetonitrile addition intermediate ( $V_p$ )

E = -1973.4483976

H = -1973.142696

G = -1973.236618

xyz

|    |              |              |              |
|----|--------------|--------------|--------------|
| 6  | -3.120268000 | -1.781109000 | 0.974671000  |
| 6  | -3.613002000 | -3.016968000 | 0.564519000  |
| 6  | -2.761822000 | -3.940139000 | -0.049144000 |
| 6  | -1.412742000 | -3.627532000 | -0.231567000 |
| 6  | -0.906223000 | -2.400711000 | 0.191489000  |
| 6  | -1.764120000 | -1.450650000 | 0.781561000  |
| 6  | -1.196649000 | -0.170511000 | 1.212831000  |
| 6  | -1.784704000 | 1.049963000  | 1.116668000  |
| 16 | -1.250024000 | 2.649637000  | 1.695498000  |
| 6  | 0.388255000  | 2.264928000  | 2.404622000  |
| 7  | -2.164971000 | 1.537873000  | -2.739430000 |
| 6  | -1.020199000 | 1.396962000  | -2.878605000 |
| 6  | 0.416720000  | 1.221487000  | -3.045401000 |
| 8  | 1.900080000  | -0.602348000 | 1.296057000  |
| 16 | 2.293616000  | -0.130220000 | -0.057393000 |
| 8  | 1.846322000  | -1.004126000 | -1.169356000 |
| 6  | 4.146864000  | -0.298864000 | -0.063732000 |
| 9  | 4.693567000  | 0.449547000  | 0.906870000  |
| 8  | 2.065357000  | 1.324178000  | -0.277790000 |
| 9  | 4.506707000  | -1.575440000 | 0.134041000  |
| 9  | 4.649476000  | 0.104430000  | -1.241628000 |
| 1  | -3.775770000 | -1.091162000 | 1.499935000  |
| 1  | -4.655978000 | -3.268036000 | 0.738994000  |
| 1  | -3.147013000 | -4.904370000 | -0.369695000 |
| 1  | -0.745317000 | -4.344262000 | -0.701300000 |

|   |              |              |              |
|---|--------------|--------------|--------------|
| 1 | 0.139644000  | -2.153341000 | 0.037952000  |
| 1 | 0.729545000  | 3.213498000  | 2.827900000  |
| 1 | 0.303482000  | 1.522684000  | 3.201498000  |
| 1 | 1.073134000  | 1.934349000  | 1.620269000  |
| 1 | 0.958886000  | 1.757514000  | -2.258352000 |
| 1 | 0.690199000  | 0.167926000  | -2.926835000 |
| 1 | 0.725608000  | 1.581822000  | -4.031748000 |
| 1 | -0.171785000 | -0.199404000 | 1.584124000  |
| 7 | -2.959133000 | 1.178128000  | 0.392060000  |
| 6 | -3.841830000 | 1.366157000  | -0.327434000 |
| 6 | -4.942798000 | 1.566220000  | -1.244623000 |
| 1 | -5.595597000 | 0.686736000  | -1.227036000 |
| 1 | -5.516182000 | 2.451540000  | -0.951275000 |
| 1 | -4.508308000 | 1.697952000  | -2.242513000 |

Second acetonitrile addition TS ( $\mathbf{VI}_p$ )

E = -1973.4357521

H = -1973.131391

G = -1973.219696

$\bar{u}$  = -288.7  $\text{cm}^{-1}$

xyz

|    |              |              |              |
|----|--------------|--------------|--------------|
| 6  | 1.781179000  | 1.384418000  | 0.776858000  |
| 6  | 3.143321000  | 1.698779000  | 0.950031000  |
| 6  | 3.621148000  | 2.973161000  | 0.652474000  |
| 6  | 2.749940000  | 3.957396000  | 0.178900000  |
| 6  | 1.393906000  | 3.662044000  | 0.020580000  |
| 6  | 0.906141000  | 2.393302000  | 0.325840000  |
| 6  | 1.214113000  | 0.063641000  | 1.083014000  |
| 6  | 1.813621000  | -1.140704000 | 0.932516000  |
| 7  | 3.077453000  | -1.253342000 | 0.334169000  |
| 6  | 3.590994000  | -1.341503000 | -0.744059000 |
| 6  | 4.911900000  | -1.461003000 | -1.380877000 |
| 16 | 1.235244000  | -2.757782000 | 1.402884000  |
| 6  | -0.323590000 | -2.377436000 | 2.275837000  |
| 7  | 2.401549000  | -1.244236000 | -2.166202000 |
| 6  | 1.254485000  | -1.117802000 | -2.338166000 |
| 6  | -0.147777000 | -0.975896000 | -2.644661000 |
| 8  | -2.129104000 | -1.331579000 | -0.358245000 |
| 16 | -2.370913000 | 0.111870000  | -0.071382000 |
| 8  | -1.884501000 | 1.031920000  | -1.134350000 |
| 8  | -2.023728000 | 0.521282000  | 1.309091000  |
| 6  | -4.222732000 | 0.276860000  | -0.150538000 |
| 9  | -4.593202000 | 1.542237000  | 0.089716000  |
| 9  | -4.671021000 | -0.072826000 | -1.366782000 |

|   |              |              |              |
|---|--------------|--------------|--------------|
| 9 | -4.805940000 | -0.516794000 | 0.759548000  |
| 1 | 3.821471000  | 0.956066000  | 1.360626000  |
| 1 | 4.672224000  | 3.203774000  | 0.806800000  |
| 1 | 3.124009000  | 4.951641000  | -0.050479000 |
| 1 | 0.707427000  | 4.424339000  | -0.337311000 |
| 1 | -0.147246000 | 2.164495000  | 0.196124000  |
| 1 | -0.662641000 | -3.339782000 | 2.668630000  |
| 1 | -0.140202000 | -1.690477000 | 3.105151000  |
| 1 | -1.065888000 | -1.975695000 | 1.583743000  |
| 1 | 4.923015000  | -2.331340000 | -2.043075000 |
| 1 | 5.100166000  | -0.570219000 | -1.988078000 |
| 1 | 5.678097000  | -1.560054000 | -0.608578000 |
| 1 | 0.183046000  | 0.062646000  | 1.431269000  |
| 1 | -0.488658000 | 0.049426000  | -2.439622000 |
| 1 | -0.323828000 | -1.241945000 | -3.692447000 |
| 1 | -0.753059000 | -1.603334000 | -1.973359000 |

Second acetonitrile addition intermediate (**VII<sub>p</sub>**)

E = -1973.4802336

H = -1973.172726

G = -1973.257651

xyz

|    |              |              |              |
|----|--------------|--------------|--------------|
| 6  | -0.633250000 | -3.171459000 | 1.102841000  |
| 6  | 0.322072000  | -4.144552000 | 0.822402000  |
| 6  | 0.905189000  | -4.210047000 | -0.444602000 |
| 6  | 0.515586000  | -3.289183000 | -1.420240000 |
| 6  | -0.432645000 | -2.307724000 | -1.139378000 |
| 6  | -1.032065000 | -2.225472000 | 0.135011000  |
| 6  | -2.056222000 | -1.250331000 | 0.522268000  |
| 6  | -2.518852000 | -0.166615000 | -0.147027000 |
| 16 | -3.878209000 | 0.857654000  | 0.436805000  |
| 6  | -4.679564000 | -0.188211000 | 1.697358000  |
| 7  | -2.072868000 | 0.214283000  | -1.420274000 |
| 6  | -1.464115000 | 1.312774000  | -1.656501000 |
| 6  | -1.052280000 | 1.673483000  | -3.057917000 |
| 8  | 2.309675000  | 1.543279000  | 2.021798000  |
| 16 | 2.261182000  | 1.456493000  | 0.570716000  |
| 8  | 0.696362000  | 1.304696000  | 0.046474000  |
| 6  | 2.739445000  | -0.289026000 | 0.065388000  |
| 9  | 4.049747000  | -0.398693000 | 0.281998000  |
| 8  | 2.964745000  | 2.406400000  | -0.278872000 |
| 9  | 2.079906000  | -1.161273000 | 0.808075000  |
| 9  | 2.477101000  | -0.470973000 | -1.222182000 |
| 1  | -1.084730000 | -3.135320000 | 2.092158000  |



|   |              |              |              |
|---|--------------|--------------|--------------|
| 1 | 0.608285000  | -4.855338000 | 1.593663000  |
| 1 | 1.649583000  | -4.969214000 | -0.669540000 |
| 1 | 0.954540000  | -3.334581000 | -2.414198000 |
| 1 | -0.729286000 | -1.607620000 | -1.910360000 |
| 1 | -5.619745000 | 0.311969000  | 1.945129000  |
| 1 | -4.893646000 | -1.181516000 | 1.294350000  |
| 1 | -4.077596000 | -0.274321000 | 2.606004000  |
| 1 | -1.511661000 | 2.622765000  | -3.355319000 |
| 1 | 0.035387000  | 1.805355000  | -3.111601000 |
| 1 | -1.360876000 | 0.884473000  | -3.745542000 |
| 1 | -2.486637000 | -1.436347000 | 1.501219000  |
| 7 | -1.219807000 | 2.320872000  | -0.706611000 |
| 6 | -0.239698000 | 2.371509000  | 0.077027000  |
| 6 | -0.021725000 | 3.459225000  | 1.081196000  |
| 1 | 0.054576000  | 3.040826000  | 2.089224000  |
| 1 | 0.906989000  | 4.002550000  | 0.872988000  |
| 1 | -0.862300000 | 4.151114000  | 1.026512000  |

Pyrimidine scaffold formation TS (**VIII<sub>p</sub>**)

E = -1973.4531322

H = -1973.147480

G = -1973.228810

$\bar{\nu}$  = -353.2 cm<sup>-1</sup>

xyz

|    |              |              |              |
|----|--------------|--------------|--------------|
| 6  | 2.654983000  | -0.463307000 | -0.664951000 |
| 6  | 2.967693000  | -1.746403000 | -1.160168000 |
| 6  | 4.234219000  | -2.300228000 | -0.992544000 |
| 6  | 5.231306000  | -1.582508000 | -0.329254000 |
| 6  | 4.943583000  | -0.304457000 | 0.154815000  |
| 6  | 3.674976000  | 0.250203000  | -0.005008000 |
| 6  | 1.293183000  | 0.044155000  | -0.908030000 |
| 6  | 0.851517000  | 1.372820000  | -0.780327000 |
| 7  | 1.222862000  | 2.219883000  | 0.193142000  |
| 6  | 1.116875000  | 1.852488000  | 1.462621000  |
| 7  | 0.640965000  | 0.673491000  | 1.861813000  |
| 6  | 0.229990000  | -0.325485000 | 1.122905000  |
| 6  | 0.715271000  | -1.724614000 | 1.388628000  |
| 16 | -0.360509000 | 1.902335000  | -1.959068000 |
| 6  | -1.135622000 | 3.329135000  | -1.125006000 |
| 6  | 1.567566000  | 2.807810000  | 2.530321000  |
| 8  | -1.177098000 | -0.207294000 | 0.782555000  |
| 16 | -2.090279000 | -1.440944000 | 0.202604000  |
| 8  | -1.601916000 | -1.889181000 | -1.094885000 |
| 8  | -2.403114000 | -2.390391000 | 1.261144000  |

|   |              |              |              |
|---|--------------|--------------|--------------|
| 6 | -3.610191000 | -0.374691000 | -0.069258000 |
| 9 | -3.358506000 | 0.579458000  | -0.959986000 |
| 9 | -4.569731000 | -1.176529000 | -0.528516000 |
| 9 | -3.989978000 | 0.170018000  | 1.081911000  |
| 1 | 2.202944000  | -2.307714000 | -1.692196000 |
| 1 | 4.443614000  | -3.291222000 | -1.386741000 |
| 1 | 6.221104000  | -2.010438000 | -0.196565000 |
| 1 | 5.715016000  | 0.270405000  | 0.660951000  |
| 1 | 3.481294000  | 1.252708000  | 0.358102000  |
| 1 | -0.362692000 | 3.950242000  | -0.669214000 |
| 1 | -1.664894000 | 3.891721000  | -1.897625000 |
| 1 | -1.844275000 | 2.991238000  | -0.365291000 |
| 1 | 2.477733000  | 2.425834000  | 3.007726000  |
| 1 | 1.772386000  | 3.789411000  | 2.100357000  |
| 1 | 0.803279000  | 2.888418000  | 3.309969000  |
| 1 | 0.724707000  | -0.556845000 | -1.615114000 |
| 1 | 0.205037000  | -2.097416000 | 2.284719000  |
| 1 | 0.512089000  | -2.407699000 | 0.562109000  |
| 1 | 1.787356000  | -1.695630000 | 1.577894000  |

Pyrimidine intermediate (**IX<sub>p</sub>**)

E = -1973.5059429

H = -1973.197248

G = -1973.278357

xyz

|    |              |              |              |
|----|--------------|--------------|--------------|
| 6  | 0.181679000  | -0.669886000 | 1.099784000  |
| 6  | 0.861322000  | -0.195170000 | -0.216308000 |
| 6  | 0.758185000  | 1.321768000  | -0.254737000 |
| 7  | 0.733579000  | 2.056476000  | 0.802802000  |
| 6  | 0.757986000  | 1.381322000  | 2.041650000  |
| 7  | 0.499617000  | 0.136684000  | 2.251100000  |
| 6  | 2.300922000  | -0.680471000 | -0.385536000 |
| 6  | 2.551450000  | -1.758284000 | -1.246416000 |
| 6  | 3.846134000  | -2.248143000 | -1.418321000 |
| 6  | 4.912311000  | -1.662950000 | -0.734170000 |
| 6  | 4.674299000  | -0.584285000 | 0.119097000  |
| 6  | 3.379182000  | -0.095384000 | 0.291755000  |
| 16 | 0.690289000  | 2.034006000  | -1.855633000 |
| 6  | 0.628825000  | 3.812746000  | -1.453566000 |
| 6  | 1.091981000  | 2.269932000  | 3.204069000  |
| 8  | -1.312328000 | -0.391806000 | 0.930532000  |
| 16 | -2.313117000 | -1.324446000 | 0.081537000  |
| 8  | -1.656574000 | -1.891566000 | -1.096398000 |
| 6  | 0.391576000  | -2.135979000 | 1.440610000  |

|   |              |              |              |
|---|--------------|--------------|--------------|
| 8 | -3.113535000 | -2.161604000 | 0.961319000  |
| 6 | -3.404504000 | 0.073601000  | -0.513803000 |
| 9 | -2.687389000 | 0.923793000  | -1.249481000 |
| 9 | -4.372637000 | -0.454488000 | -1.262823000 |
| 9 | -3.938265000 | 0.715570000  | 0.521368000  |
| 1 | 1.724730000  | -2.216343000 | -1.783732000 |
| 1 | 4.020015000  | -3.084080000 | -2.090350000 |
| 1 | 5.922005000  | -2.041171000 | -0.868234000 |
| 1 | 5.498831000  | -0.117969000 | 0.651567000  |
| 1 | 3.213977000  | 0.751574000  | 0.950182000  |
| 1 | 0.619423000  | 4.339955000  | -2.410317000 |
| 1 | -0.274815000 | 4.041394000  | -0.886800000 |
| 1 | 1.506023000  | 4.098864000  | -0.871176000 |
| 1 | 1.115781000  | 1.693784000  | 4.129948000  |
| 1 | 2.059248000  | 2.760378000  | 3.041127000  |
| 1 | 0.344090000  | 3.067784000  | 3.282345000  |
| 1 | 0.281954000  | -0.610494000 | -1.043690000 |
| 1 | -0.228638000 | -2.387039000 | 2.304366000  |
| 1 | 0.147294000  | -2.791517000 | 0.601443000  |
| 1 | 1.438980000  | -2.287168000 | 1.711688000  |

Final N-protonated product ( $X_p$ )

E = -1973.5660549

H = -1973.257321

G = -1973.341354

xyz

|    |              |              |              |
|----|--------------|--------------|--------------|
| 6  | -0.709864000 | -0.465823000 | -0.603925000 |
| 6  | -1.972518000 | -0.005435000 | -0.239555000 |
| 6  | -2.105371000 | 1.397704000  | -0.067718000 |
| 7  | -1.090077000 | 2.259542000  | -0.244310000 |
| 6  | 0.091507000  | 1.769667000  | -0.586323000 |
| 7  | 0.285322000  | 0.447679000  | -0.766729000 |
| 6  | -3.122748000 | -0.931175000 | -0.019064000 |
| 6  | -3.225061000 | -1.659711000 | 1.175553000  |
| 6  | -4.298386000 | -2.526185000 | 1.381516000  |
| 6  | -5.279158000 | -2.672590000 | 0.398783000  |
| 6  | -5.184771000 | -1.950230000 | -0.792031000 |
| 6  | -4.112920000 | -1.082546000 | -1.001299000 |
| 16 | -3.667768000 | 2.047583000  | 0.412429000  |
| 6  | -3.296438000 | 3.831339000  | 0.542661000  |
| 6  | 1.261593000  | 2.682587000  | -0.786511000 |
| 8  | 2.745546000  | -0.246226000 | -1.318796000 |
| 16 | 3.380876000  | -1.089883000 | -0.229846000 |
| 8  | 2.401306000  | -1.444140000 | 0.822021000  |

|   |              |              |              |
|---|--------------|--------------|--------------|
| 6 | -0.335935000 | -1.896261000 | -0.831631000 |
| 8 | 4.270003000  | -2.140143000 | -0.726675000 |
| 6 | 4.502233000  | 0.141780000  | 0.601199000  |
| 9 | 3.783060000  | 1.190581000  | 1.068526000  |
| 9 | 5.132872000  | -0.415986000 | 1.639040000  |
| 9 | 5.413984000  | 0.617018000  | -0.254372000 |
| 1 | -2.462147000 | -1.546084000 | 1.940894000  |
| 1 | -4.366491000 | -3.086745000 | 2.309423000  |
| 1 | -6.113993000 | -3.348836000 | 0.559898000  |
| 1 | -5.943635000 | -2.063216000 | -1.561072000 |
| 1 | -4.039013000 | -0.523197000 | -1.929930000 |
| 1 | -4.236150000 | 4.297770000  | 0.848532000  |
| 1 | -2.526763000 | 4.012156000  | 1.294049000  |
| 1 | -2.974380000 | 4.232619000  | -0.418915000 |
| 1 | 1.598761000  | 2.646820000  | -1.828650000 |
| 1 | 0.971343000  | 3.702306000  | -0.532835000 |
| 1 | 2.107434000  | 2.363822000  | -0.170532000 |
| 1 | 1.286733000  | 0.108782000  | -0.998130000 |
| 1 | 0.106212000  | -2.013229000 | -1.827795000 |
| 1 | 0.439260000  | -2.183799000 | -0.109789000 |
| 1 | -1.200678000 | -2.552082000 | -0.740272000 |

## Supplementary References

<sup>i</sup> Bruker SAINT V7.68A & V8.32B Copyright © 2005-2015 Bruker AXS

<sup>ii</sup> Sheldrick, G. M. (1996). *SADABS*. University of Göttingen, Germany.

<sup>iii</sup> Sheldrick, G.M. (2008). *Acta Cryst.* A64, 112-122

<sup>iv</sup> Sheldrick, G.M. (2008). *Acta Cryst.* A64, 112-122

<sup>v</sup> Dolomanov, O.V., Bourhis, L.J., Gildea, R.J, Howard, J.A.K. & Puschmann, H. , *OLEX2*, (2009), *J. Appl. Cryst.* 42, 339-341

<sup>vi</sup> C. B. Huebschle, G. M. Sheldrick and B. Dittrich, *ShelXle: a Qt graphical user interface for SHELXL*, *J. Appl. Cryst.*, 44, (2011) 1281-1284

<sup>vii</sup> Dolomanov, O.V., Bourhis, L.J., Gildea, R.J, Howard, J.A.K. & Puschmann, H. , *OLEX2*, (2009), *J. Appl. Cryst.* 42, 339-341

<sup>viii</sup> a) Becke, A. D. (1988). *Phys. Rev. A* 38, 3098–3100. b) Lee, C.; Yang, W.; Parr, R. G. (1988). *Phys. Rev. B* 37, 785–789. c) Becke, A. D. (1993). *J. Chem. Phys.* 98, 5648–5652.

<sup>ix</sup> Frisch, M. J.; Trucks, G. W.; Schlegel, H. B.; Scuseria, G. E.; Robb, M. A.; Cheeseman, J. R.; Scalmani, G.; Barone, V.; Mennucci, B.; Petersson, G. A.; Nakatsuji, H.; Caricato, M.; Li, X.; Hratchian, H. P.; Izmaylov, A. F.; Bloino, J.; Zheng, G.; Sonnenberg, J. L.; Hada, M.; Ehara, M.; Toyota, K.; Fukuda, R.; Hasegawa, J.; Ishida, M.; Nakajima, T.; Honda, Y.; Kitao, O.; Nakai, H.; Vreven, T.; Montgomery, Jr., J. A.; Peralta, J. E.; Ogliaro, F.; Bearpark, M.; Heyd, J. J.; Brothers, E.; Kudin, K. N.; Staroverov, V. N.; Keith, T.; Kobayashi, R.; Normand, J.; Raghavachari, K.; Rendell, A.; Burant, J. C.; Iyengar, S. S.; Tomasi, J.; Cossi, M.; Rega, N.; Millam, N. J.; Klene, M.; Knox, J. E.; Cross, J. B.; Bakken, V.; Adamo, C.; Jaramillo, J.; Gomperts, R.; Stratmann, R. E.; Yazyev, O.; Austin, A. J.; Cammi, R.; Pomelli, C.; Ochterski, J. W.; Martin, R. L.; Morokuma, K.; Zakrzewski, V. G.; Voth, G. A.; Salvador, P.; Dannenberg, J.

---

J.; Dapprich, S.; Daniels, A. D.; Farkas, O.; Foresman, J. B.; Ortiz, J. V.; Cioslowski, J.; Fox, D. J.; Gaussian 09, revision D.01. Gaussian, Inc., Wallingford CT (2013).

<sup>x</sup> Hariharan, P. C.; Pople, J. A. (1974). *Mol. Phys.* 27, 209–214.

<sup>xi</sup> <http://www.chemcraftprog.com>
